# Supplementary material for: Global Proteomic Analysis of Lysine Malonylation in Toxoplasma gondii
Source: Front Microbiol. 2020 Apr 28;11:776. doi: 10.3389/fmicb.2020.00776 (PMC7198775; doi:10.3389/fmicb.2020.00776)
Supplement: TABLE S1 — The identified Kmal sites in T. gondii in Exp.1. [file Table_1.XLSX]

## Sheet: Summary
Header line description of table 1			Table 1. MS/MS spectrum database search analysis summary
Total spectrums	Number of spectrums produced by mass spectrometer
Matched spectrums	Number of spectrums matched with alignment protein		Total spectrums	Matched spectrums	Peptides	Modified peptides	Identified proteins	Identified sites
Peptides	Number of peptides which spectrums hit		31406	3330 (10.6%)	2230	292	203	294
Modified peptides	Total number of modified peptides identified
Identified proteins	Number of proteins detected by spectrum search analysis
Identified sites	Number of modification sites detected by spectrum search analysis
Header line description of worksheet "Quant"
Protein accession	Protein accession number of database used for search
Position	Modification site localization in protein
Amino acid	The amino acid that modification site modified
Protein description	Protein functional description
Gene name	Indicates the name of the gene that code for the protein sequence
Localization probability	Probability of a certain amino acid containing this modification in this peptide
PEP	The maximal posterior error probability for peptides
Score	A simple rule to be used to judge whether a result is significant or not
Modified sequence	Identified peptide sequence marked with modification sites localization probabilities
Charge	Carried charge of peptide
Mass error [ppm]	Parts per million ratio of peptide mass error between the theory and practice
MS/MS Count	Number of spectrum matched with peptide
Header line description of worksheet "pep_quant"
ID	Identified peptide index number
Sequence	Identified peptide amino acid sequence
Length	Identified peptide amino acid length
Modifications	identified peptide with modification markers
Modified sequence	Identified peptide sequence marked with modification sites localization probabilities
Protein accession	Protein accession number of database used for search
Protein description	Protein functional description
Charge	Carried charge of peptide
m/z	Mass-to-charge ratio of peptide
Mass error [ppm]	Parts per million ratio of peptide mass error between the theory and practice
PEP	The maximal posterior error probability for peptides
Score	A simple rule to be used to judge whether a result is significant or not
MS/MS Count	Number of spectrum matched with peptide

## Sheet: Quant
Protein accession	Position	Amino acid	Protein description	Gene name	Localization probability	PEP	Score	Modified sequence	Charge	Mass error [ppm]	MS/MS Count
TGME49_203150-t26_1-p1	762	K	hypothetical protein GN=TGME49_203150	TGME49_203150	1	0.0103408	50.305	PLAGVCTLDK(1)SAR	2	-1.832	1
TGME49_203420-t26_1-p1	1065	K	4'-phosphopantetheinyl transferase domain-containing protein GN=TGME49_203420	TGME49_203420	1	0.000582803	117.53	ASAFLAK(1)R	2	0.55586	2
TGME49_205320-t26_1-p1	362	K	Putative serine-rich adhesin for platelets family protein(predict) GN=TGME49_205320	TGME49_205320	1	0.000143453	48.288	APEK(1)QHLQTVFESQR	3	0.102	1
TGME49_205380-t26_1-p1	385	K	fructose-bisphospatase I GN=TGME49_205380	TGME49_205380	1	0.00057846	57.414	TAELGTPNAGNK(1)R	2	0.84467	1
TGME49_205470-t26_1-p1	924	K	translation elongation factor 2 family protein, putative GN=TGME49_205470	TGME49_205470	1	0.000787608	48.568	GSK(1)MEELVHNIR	3	0.21524	1
TGME49_205700-t26_1-p1	232	K	cyclophilin precursor GN=TGME49_205700	TGME49_205700	1	0.00124597	47.712	PLYYK(1)GCPFHR	3	-0.36695	1
TGME49_206320-t26_1-p1	69	K	Putative transmembrane protein(predict) GN=TGME49_206320	TGME49_206320	1	2.10631e-06	73.928	LTPEDMQTQK(1)DNSGK	2	-1.0749	1
TGME49_206610-t26_1-p1	492	K	pyruvate dehydrogenase complex subunit PDH-E2 GN=TGME49_206610	TGME49_206610	1	0.000108364	43.592	TAAFMK(1)HGQALAR	3	-0.15004	1
TGME49_206610-t26_1-p1	624	K	pyruvate dehydrogenase complex subunit PDH-E2 GN=TGME49_206610	TGME49_206610	0.794846	0.000855585	78.964	K(0.795)NK(0.205)LNLEEVK	3	-0.087188	1
TGME49_206610-t26_1-p1	576	K	pyruvate dehydrogenase complex subunit PDH-E2 GN=TGME49_206610	TGME49_206610	1	0.00610546	46.88	VSPAPPPYLK(1)R	2	0.1311	1
TGME49_207110-t26_1-p1	69	K	hypothetical protein GN=TGME49_207110	TGME49_207110	1	0.00750386	63.292	K(1)VAEIQQRERR	2	1.8852	1
TGME49_207640-t26_1-p1	855	K	isoleucyl-tRNA synthetase family protein GN=TGME49_207640	TGME49_207640	1	0.000969928	64.52	ASALISK(1)GNSMDR	2	-0.048144	2
TGME49_208320-t26_1-p1	342	K	polynucleotide kinase 3 phosphatase GN=TGME49_208320	TGME49_208320	1	0.0289818	51.771	TPK(1)DHSAADLK	2	-0.070447	1
TGME49_208390-t26_1-p1	379	K	Capping protein alpha-like subunit, putative(predict) GN=TGME49_208390	TGME49_208390	1	0.0051935	46.73	HVIEFIK(1)TK	3	-0.078025	1
TGME49_209030-t26_1-p1	114	K	actin ACT1 GN=TGME49_209030	TGME49_209030	1	2.97348e-07	52.898	VAPEEHPVLLTEAPLNPK(1)ANR	3	0.51902	1
TGME49_209030-t26_1-p1	329	K	actin ACT1 GN=TGME49_209030	TGME49_209030	1	0.0271743	72.34	IK(1)VVAPPER	2	0.13365	1
TGME49_209030-t26_1-p1	62	K	actin ACT1 GN=TGME49_209030	TGME49_209030	1	3.45868e-05	78.505	DCYVGDEAQSK(1)R	2	-0.23737	2
TGME49_209210-t26_1-p1	649	K	KH domain-containing protein(predict) GN=TGME49_209210	TGME49_209210	1	0.00736371	43.501	EK(1)AALVTWR	2	0.64229	1
TGME49_209450-t26_1-p1	123	K	TLD protein GN=TGME49_209450	TGME49_209450	1	3.06264e-13	103.79	NLGNLTCSGK(1)GAR	2	0.92772	1
TGME49_209450-t26_1-p1	179	K	TLD protein GN=TGME49_209450	TGME49_209450	1	0.0319963	44.863	VLEEQCK(1)R	2	-1.4155	2
TGME49_209600-t26_1-p1	169	K	Cgd5_3650 protein(predict) GN=TGME49_209600	TGME49_209600	1	0.0259228	40.475	VLPDTENVK(1)K	2	-0.49743	1
TGME49_209910-t26_1-p1	113	K	histone H2Bv GN=TGME49_209910	TGME49_209910	1	3.96051e-06	83.351	HAVSEGTK(1)AVTK	2	0.21306	3
TGME49_211030-t26_1-p1	148	K	hypothetical protein GN=TGME49_211030	TGME49_211030	1	0.0312462	50.102	LTTADEK(1)FVTK	2	0.56982	1
TGME49_211680-t26_1-p1	60	K	protein disulfide isomerase GN=TGME49_211680	TGME49_211680	1	0.00392802	55.261	FYAPWCGHCK(1)R	3	-0.28985	1
TGME49_213350-t26_1-p1	77	K	ribosomal protein RPS15 GN=TGME49_213350	TGME49_213350	1	1.68841e-06	57.788	NCAFGEK(1)PEPVNTHLR	3	2.004	1
TGME49_213350-t26_1-p1	70	K	ribosomal protein RPS15 GN=TGME49_213350	TGME49_213350	0.990116	0.000644717	42.059	K(0.99)NCAFGEK(0.01)PEPVNTHLR	4	0.14	1
TGME49_213350-t26_1-p1	13	K	ribosomal protein RPS15 GN=TGME49_213350	TGME49_213350	1	0.00159801	52.527	ADAGDAAANQPK(1)R	2	0.022054	1
TGME49_213740-t26_1-p1	393	K	Spermine/spermidine synthase family,related protein(predict) GN=TGME49_213740	TGME49_213740	1	0.0056352	44.511	VFEETCDEK(1)K	2	-0.12224	2
TGME49_214290-t26_1-p1	242	K	DJ-1 family protein GN=TGME49_214290	TGME49_214290	1	0.000544334	68.044	LIEVLYNK(1)EQAK	2	0.18241	2
TGME49_216650-t26_1-p1	124	K	S15 sporozoite-expressed protein GN=TGME49_216650	TGME49_216650	1	0.000217907	70.197	RGDCK(1)LGIEGDK	2	-0.61173	3
TGME49_216650-t26_1-p1	360	K	S15 sporozoite-expressed protein GN=TGME49_216650	TGME49_216650	1	2.1343e-13	85.737	HTDNIHFK(1)CSCDAEEK	3	-0.018863	2
TGME49_216860-t26_1-p1	217	K	DEAD (Asp-Glu-Ala-Asp) box polypeptide DDX39 GN=TGME49_216860	TGME49_216860	1	0.00986519	41.695	K(1)DVQNIFMATPK	2	1.8341	1
TGME49_216900-t26_1-p1	356	K	cytokine induced apoptosis inhibitor 1 family protein GN=TGME49_216900	TGME49_216900	1	0.00950629	59.731	K(1)EAEEAAEK	2	0.67509	2
TGME49_217000-t26_1-p1	637	K	hypothetical protein GN=TGME49_217000	TGME49_217000	1	0.00369354	101.35	HIGK(1)LSLQK	2	-0.50959	1
TGME49_217010-t26_1-p1	29	K	GYF domain-containing protein(predict) GN=TGME49_217010	TGME49_217010	1	0.0180962	64.121	VCFK(1)QEQEVR	2	0.12269	1
TGME49_217480-t26_1-p1	121	K	Cgd7_610 protein(predict) GN=TGME49_217480	TGME49_217480	1	0.0057096	51.495	VGAVCAGK(1)QGAESR	2	-0.31988	1
TGME49_217740-t26_1-p1	328	K	3-ketoacyl-(acyl-carrier-protein) reductase GN=TGME49_217740	TGME49_217740	1	0.000125979	78.705	K(1)HAMAQIPANR	2	0.28074	2
TGME49_217740-t26_1-p1	321	K	3-ketoacyl-(acyl-carrier-protein) reductase GN=TGME49_217740	TGME49_217740	1	2.40065e-05	68.044	SAMTDK(1)MPEEAK	2	-0.45732	3
TGME49_217890-t26_1-p1	67	K	alkyl hydroperoxide reductase/ Thiol specific antioxidant/ Mal allergen, putative GN=TGME49_217890	TGME49_217890	1	0.0293377	53.493	LHGEFEK(1)R	3	-0.80349	1
TGME49_218000-t26_1-p1	1022	K	GATA-type domain-containing protein(predict) GN=TGME49_218000	TGME49_218000	1	2.68175e-07	89.507	EK(1)AEAAVHASQK	2	-0.040277	4
TGME49_219310-t26_1-p1	274	K	DnaK family protein GN=TGME49_219310	TGME49_219310	1	0.0185875	78.136	LEDQANK(1)AK	2	0.49991	1
TGME49_219540-t26_1-p1	1146	K	cytosolic tRNA-Ala synthetase GN=TGME49_219540	TGME49_219540	1	0.00748049	85.355	ALLELQK(1)AR	2	-0.19586	1
TGME49_219850-t26_1-p1	206	K	prolyl-tRNA synthetase (ProRS) GN=TGME49_219850	TGME49_219850	1	0.0205271	63.091	GIAK(1)LLSAPR	2	0.38957	1
TGME49_220400-t26_1-p1	35	K	actin depolymerizing factor ADF GN=TGME49_220400	TGME49_220400	1	0.00790156	76.073	IENTK(1)IVVEK	2	0.28373	1
TGME49_222020-t26_1-p1	254	K	phosphoglycerate kinase PGKII GN=TGME49_222020	TGME49_222020	1	2.34141e-09	126.55	TIVCSHLGRPK(1)TEEDR	3	-0.30974	5
TGME49_222020-t26_1-p1	317	K	phosphoglycerate kinase PGKII GN=TGME49_222020	TGME49_222020	1	2.42546e-06	104.17	GETK(1)NDEELSR	2	0.30499	2
TGME49_222840-t26_1-p1	161	K	Ser/Thr phosphatase family protein GN=TGME49_222840	TGME49_222840	1	0.00606874	47.037	K(1)NAEWAEEIGR	2	0.42717	1
TGME49_223050-t26_1-p1	121	K	ribosomal protein RPS20 GN=TGME49_223050	TGME49_223050	1	0.017219	52.527	LMK(1)GGLEGEEQR	2	-2.0278	1
TGME49_224890-t26_1-p1	543	K	AMP-binding enzyme(predict) GN=TGME49_224890	TGME49_224890	1	0.00120044	46.543	VVERPAGK(1)QEINER	3	0.50046	1
TGME49_224960-t26_1-p1	209	K	Preprotein translocase subunit Sec66(predict) GN=TGME49_224960	TGME49_224960	1	2.14071e-05	69.03	AAIQK(1)QECVLQQQK	2	0.68155	1
TGME49_225050-t26_1-p1	322	K	adenosylhomocysteinase, putative GN=TGME49_225050	TGME49_225050	0.88657	0.0176492	40.352	LLQMAK(0.113)K(0.887)K	2	-2.4923	1
TGME49_225930-t26_1-p1	58	K	triose-phosphate isomerase TPI-I GN=TGME49_225930	TGME49_225930	1	0.00370187	56.29	K(1)YHVGLQNCSK	3	-0.16326	1
TGME49_225990-t26_1-p1	378	K	acyl transferase domain-containing protein GN=TGME49_225990	TGME49_225990	1	0.0158695	65.241	K(1)VTPEEAK	2	0.18603	1
TGME49_226400-t26_1-p1	190	K	lipoic acid synthase LIPA GN=TGME49_226400	TGME49_226400	1	0.00346468	57.148	SCGSGK(1)NPELPLK	2	-0.1346	1
TGME49_226410-t26_1-p1	138	K	EF-1 guanine nucleotide exchange domain-containing protein GN=TGME49_226410	TGME49_226410	1	0.00423146	47.68	LLGAPNATK(1)FVDASR	2	1.5611	2
TGME49_226410-t26_1-p1	253	K	EF-1 guanine nucleotide exchange domain-containing protein GN=TGME49_226410	TGME49_226410	1	0.013086	45.368	K(1)VPVAFGLYK	2	1.0135	1
TGME49_226720-t26_1-p1	88	K	translin family protein GN=TGME49_226720	TGME49_226720	1	2.88127e-07	98.105	LAK(1)QAIFALHR	3	-0.87738	1
TGME49_226830-t26_1-p1	766	K	DnaK family protein GN=TGME49_226830	TGME49_226830	1	0.00740049	54.259	AEGIEAVK(1)K	2	0.88835	1
TGME49_226840-t26_1-p1	462	K	JmjC domain-containing protein(predict) GN=TGME49_226840	TGME49_226840	1	0.00459117	45.992	GEK(1)AK(1)QTTGEK	2	-1.391	1
TGME49_226840-t26_1-p1	460	K	JmjC domain-containing protein(predict) GN=TGME49_226840	TGME49_226840	1	0.00459117	45.992	GEK(1)AK(1)QTTGEK	2	-1.391	1
TGME49_226960-t26_1-p1	664	K	phosphofructokinase PFKII GN=TGME49_226960	TGME49_226960	1	0.00973467	63.091	DFFGGACK(1)LQK	2	0.33529	1
TGME49_226960-t26_1-p1	206	K	phosphofructokinase PFKII GN=TGME49_226960	TGME49_226960	1	0.00289026	88.338	HK(1)IETDEQK	2	0.54576	1
TGME49_226960-t26_1-p1	1213	K	phosphofructokinase PFKII GN=TGME49_226960	TGME49_226960	1	6.59135e-11	89.506	GAMK(1)SEACGAAACR	3	-0.013417	6
TGME49_227000-t26_1-p1	791	K	hypothetical protein GN=TGME49_227000	TGME49_227000	1	8e-09	101.2	HLCIQNK(1)GATEK	2	0.019198	3
TGME49_227100-t26_1-p1	70	K	Glutaredoxin domain-containing protein(predict) GN=TGME49_227100	TGME49_227100	1	0.0060804	53.034	EK(1)TGDRPGPR	3	1.1577	2
TGME49_227100-t26_1-p1	20	K	Glutaredoxin domain-containing protein(predict) GN=TGME49_227100	TGME49_227100	1	0.00227425	58.511	LCSVIK(1)SHK	3	-0.97694	1
TGME49_227100-t26_1-p1	14	K	Glutaredoxin domain-containing protein(predict) GN=TGME49_227100	TGME49_227100	1	0.000544197	64.454	CSGEAGEK(1)LCSVIK	2	-0.25223	2
TGME49_227390-t26_1-p1	669	K	SET domain-containing protein(predict) GN=TGME49_227390	TGME49_227390	1	0.00257724	45.891	EK(1)HSAPTLYR	3	-0.63313	1
TGME49_227620-t26_1-p1	110	K	dense granule protein GRA2 GN=TGME49_227620	TGME49_227620	1	0.00594517	65.043	VVAEK(1)GFTAAK	2	0.82738	1
TGME49_227650-t26_1-p1	365	K	microtubule-associated protein RP/EB family, putative GN=TGME49_227650	TGME49_227650	1	2.48538e-09	74.029	TDK(1)TGGACATHAQGSR	3	1.9619	1
TGME49_227970-t26_1-p1	166	K	histone family DNA-binding protein GN=TGME49_227970	TGME49_227970	1	0.0180945	51.771	VSLSK(1)FGSLGLR	2	-0.042498	1
TGME49_228120-t26_1-p1	3789	K	Chloroquine resistance marker(predict) GN=TGME49_228120	TGME49_228120	1	0.00604713	54.276	EK(1)DGAGASGAAGR	2	-0.36396	1
TGME49_228190-t26_1-p1	272	K	eukaryotic initiation factor-3, subunit 5, putative GN=TGME49_228190	TGME49_228190	1	3.27874e-29	144.8	LSDQLNK(1)CGAYVR	2	0.6228	2
TGME49_229140-t26_1-p1	125	K	MaoC family domain-containing protein GN=TGME49_229140	TGME49_229140	1	0.00130752	52.814	K(1)SGALVTVTSDSK	2	0.093822	1
TGME49_231630-t26_1-p1	273	K	alveolin domain containing intermediate filament IMC4 GN=TGME49_231630	TGME49_231630	1	0.000410676	57.62	YK(1)EVPVPVHVQR	3	0.077679	1
TGME49_231640-t26_1-p1	447	K	alveolin domain containing intermediate filament IMC1 GN=TGME49_231640	TGME49_231640	1	0.0115313	57.175	VNADLAEK(1)R	2	-0.30146	1
TGME49_231640-t26_1-p1	173	K	alveolin domain containing intermediate filament IMC1 GN=TGME49_231640	TGME49_231640	1	1.68168e-06	91.812	IETK(1)ENIIQRPK	2	0.62317	1
TGME49_231850-t26_1-p1	213	K	serine-threonine phosophatase 2C (PP2C) GN=TGME49_231850	TGME49_231850	1	1.47907e-05	48.053	NGGSVEYLHNHNNK(1)PFIR	3	-0.6774	2
TGME49_232350-t26_1-p1	120	K	lactate dehydrogenase LDH1 GN=TGME49_232350	TGME49_232350	1	0.0170539	63.816	EIGQNIK(1)K	2	0.2782	1
TGME49_232350-t26_1-p1	94	K	lactate dehydrogenase LDH1 GN=TGME49_232350	TGME49_232350	1	0.0171073	59.294	VPGK(1)PDSEWSR	2	-0.021793	1
TGME49_232660-t26_1-p1	164	K	Hsp70 interacting protein HIP GN=TGME49_232660	TGME49_232660	1	0.00832544	42.031	RADVLLK(1)LK	2	0.16174	1
TGME49_232800-t26_1-p1	91	K	hypothetical protein GN=TGME49_232800	TGME49_232800	1	0.0173019	43.761	K(1)AGAGETLQK	2	-0.29184	1
TGME49_233838-t26_1-p1	895	K	PET112 family, C terminal region domain-containing protein GN=TGME49_233838	TGME49_233838	1	0.00259164	59.728	LSCSGEK(1)DEGETK	2	-0.089416	1
TGME49_234250-t26_1-p1	2082	K	Putative neurofilament triplet protein M(predict) GN=TGME49_234250	TGME49_234250	1	0.00994824	58.885	IFAASK(1)PVIIDK	2	0.63582	1
TGME49_235340-t26_1-p1	703	K	hypothetical protein GN=TGME49_235340	TGME49_235340	1	0.00529032	43.592	VEQPEAVACNPK(1)R	2	0.0055296	1
TGME49_235470-t26_1-p1	11	K	myosin A GN=TGME49_235470	TGME49_235470	1	3.4438e-05	70.197	TTSEELK(1)TATALK	2	0.009484	2
TGME49_235470-t26_1-p1	745	K	myosin A GN=TGME49_235470	TGME49_235470	1	0.011109	49.595	SSK(1)LPSEEYQLGK	2	-0.7883	1
TGME49_236040-t26_1-p1	180	K	fructose-1,6-bisphosphate aldolase GN=TGME49_236040	TGME49_236040	1	2.94724e-08	81.016	VDK(1)GLETLPLTDDEK	2	0.01262	3
TGME49_236040-t26_1-p1	206	K	fructose-1,6-bisphosphate aldolase GN=TGME49_236040	TGME49_236040	1	0.0138766	67.704	K(1)YYEAGAR	2	0.081424	1
TGME49_236040-t26_1-p1	385	K	fructose-1,6-bisphosphate aldolase GN=TGME49_236040	TGME49_236040	1	0.0213085	76.302	AWK(1)GVPENK	2	-0.22661	1
TGME49_236040-t26_1-p1	393	K	fructose-1,6-bisphosphate aldolase GN=TGME49_236040	TGME49_236040	1	3.62874e-05	105.65	AK(1)AQQVLMER	2	0.096222	2
TGME49_236040-t26_1-p1	177	K	fructose-1,6-bisphosphate aldolase GN=TGME49_236040	TGME49_236040	1	0.0117391	57.288	AEGIIPGIK(1)VDK	2	0.64728	2
TGME49_236040-t26_1-p1	111	K	fructose-1,6-bisphosphate aldolase GN=TGME49_236040	TGME49_236040	1	9.78857e-17	118.21	GILAADESTGTIK(1)K	2	-0.68177	2
TGME49_238250-t26_1-p1	59	K	ribosomal protein RPL36 GN=TGME49_238250	TGME49_238250	1	0.00520648	52.172	IIELLK(1)IGTAATTK	2	0.11099	2
TGME49_239620-t26_1-p1	438	K	5'-nucleotidase, C-terminal domain-containing protein GN=TGME49_239620	TGME49_239620	1	0.000493113	58.885	EACSSGVNICIK(1)K	2	-2.0617	2
TGME49_239680-t26_1-p1	573	K	Putative transmembrane protein(predict) GN=TGME49_239680	TGME49_239680	1	0.0210006	59.067	QLQAEVK(1)R	2	1.3666	1
TGME49_239820-t26_1-p1	8	K	D-3-phosphoglycerate dehydrogenase GN=TGME49_239820	TGME49_239820	1	0.00697683	79.148	AEATAQK(1)R	2	-0.31283	1
TGME49_239820-t26_1-p1	404	K	D-3-phosphoglycerate dehydrogenase GN=TGME49_239820	TGME49_239820	1	0.00246178	54.276	CDHIVNFVNVK(1)R	3	0.26382	1
TGME49_240550-t26_1-p1	33	K	copper chaperone COX17-1, putative GN=TGME49_240550	TGME49_240550	1	0.0087594	101.33	VNAAGK(1)R	2	-0.38451	1
TGME49_240600-t26_1-p1	436	K	chaperonin cpn60, putative GN=TGME49_240600	TGME49_240600	1	0.000256176	48.968	TSILTRPEYQPSIK(1)DR	3	-0.010529	1
TGME49_240600-t26_1-p1	483	K	chaperonin cpn60, putative GN=TGME49_240600	TGME49_240600	1	0.000544197	64.454	IMIGASTETEQK(1)EK	2	0.18489	1
TGME49_240600-t26_1-p1	452	K	chaperonin cpn60, putative GN=TGME49_240600	TGME49_240600	1	0.0310829	50.222	ELEVSTSK(1)FDR	2	-0.30021	1
TGME49_240640-t26_1-p1	45	K	casein kinase I GN=TGME49_240640	TGME49_240640	1	0.00104702	51.771	SK(1)HPQLLYESK	3	0.22016	1
TGME49_240810-t26_1-p1	31	K	Putative transporter(predict) GN=TGME49_240810	TGME49_240810	1	2.84938e-36	101.45	LHSCAGGEESSGQCLEK(1)QGAGAR	3	-0.069653	2
TGME49_240890-t26_1-p1	1235	K	6-phosphofructokinase GN=TGME49_240890	TGME49_240890	1	0.00294144	93.839	LTNSAK(1)DIR	2	0.093109	2
TGME49_240890-t26_1-p1	1229	K	6-phosphofructokinase GN=TGME49_240890	TGME49_240890	1	0.000825329	62.94	GGQAGDPK(1)LTNSAK	2	-0.19084	2
TGME49_242330-t26_1-p1	51	K	ribosomal protein RPS5 GN=TGME49_242330	TGME49_242330	1	0.0210862	49.448	K(1)AMCPIVER	2	-2.3583	2
TGME49_242380-t26_1-p1	333	K	fatty acid elongase GN=TGME49_242380	TGME49_242380	1	0.00390402	99.53	GNACQK(1)PVR	2	-0.85147	2
TGME49_242890-t26_1-p1	1757	K	BLM10_mid domain-containing protein (Fragment)(predict) GN=TGME49_242890	TGME49_242890	1	0.00287675	58.885	GGDAEAK(1)GGIAGK	2	0.31623	1
TGME49_243580-t26_1-p1	251	K	Hit family protein involved in cell-cycle regulation, putative GN=TGME49_243580	TGME49_243580	1	0.00196265	56.817	YSGDHLFK(1)QFASAK	2	0.61193	1
TGME49_243600-t26_1-p1	287	K	acetyltransferase, GNAT family protein GN=TGME49_243600	TGME49_243600	1	0.0057096	51.495	CSAQK(1)GAPIGDGER	2	-0.36842	1
TGME49_243600-t26_1-p1	491	K	acetyltransferase, GNAT family protein GN=TGME49_243600	TGME49_243600	1	0.0189983	58.32	LDLTVEK(1)PEAR	2	-1.7198	1
TGME49_244050-t26_1-p1	881	K	PPR repeat protein(predict) GN=TGME49_244050	TGME49_244050	1	1.52269e-07	76.341	HTQAK(1)LLHALGAAR	3	-1.0295	1
TGME49_244560-t26_1-p1	408	K	heat shock protein 90, putative GN=TGME49_244560	TGME49_244560	1	0.0135062	68.224	ALLYIPK(1)R	2	0.77565	3
TGME49_244560-t26_1-p1	490	K	heat shock protein 90, putative GN=TGME49_244560	TGME49_244560	1	0.0147736	66.56	K(1)LSVDALK	2	-0.43431	1
TGME49_244560-t26_1-p1	478	K	heat shock protein 90, putative GN=TGME49_244560	TGME49_244560	1	0.0158393	65.278	ILNVISK(1)K	2	0.16529	1
TGME49_244880-t26_1-p1	2722	K	DNA-directed RNA polymerase I RPA1 GN=TGME49_244880	TGME49_244880	1	0.000172621	61.962	AETAGEQEVTGVK(1)K	2	0.097024	1
TGME49_245460-t26_1-p1	146	K	ribosomal protein RPS8 GN=TGME49_245460	TGME49_245460	1	3.27477e-07	116.55	HTLCLQNK(1)HR	3	-0.78052	1
TGME49_246090-t26_1-p1	691	K	hypothetical protein GN=TGME49_246090	TGME49_246090	1	0.012136	43.164	AK(1)SGPEGCGDSAVSLR	2	0.088009	1
TGME49_246960-t26_1-p1	446	K	Metallo-beta-lactamase domain protein(predict) GN=TGME49_246960	TGME49_246960	1	0.00282468	58.172	MQK(1)ALLDAR	2	0.63557	1
TGME49_248120-t26_1-p1	46	K	Putative RSC6/BAF60A-like with A SWIB domain, related protein(predict) GN=TGME49_248120	TGME49_248120	1	0.00487601	42.633	K(1)PSSASTAANASLR	2	0.18006	1
TGME49_248810-t26_1-p1	76	K	nuclear factor NF7 GN=TGME49_248810	TGME49_248810	1	0.000143386	45.347	VALESSQHCK(1)SSGEEK	3	-0.96348	1
TGME49_249390-t26_1-p1	122	K	glutamate/leucine/phenylalanine/valine dehydrogenase family protein GN=TGME49_249390	TGME49_249390	1	2.57946e-12	69.03	APSAVFHPSTSAPAICFPK(1)R	3	-0.14346	1
TGME49_249390-t26_1-p1	417	K	glutamate/leucine/phenylalanine/valine dehydrogenase family protein GN=TGME49_249390	TGME49_249390	1	0.000805771	62.338	GLHTK(1)EFFSR	3	0.24239	2
TGME49_249390-t26_1-p1	478	K	glutamate/leucine/phenylalanine/valine dehydrogenase family protein GN=TGME49_249390	TGME49_249390	1	0.00904369	46.069	RVELLVK(1)AIR	3	0.38142	1
TGME49_249900-t26_1-p1	14	K	adenine nucleotide translocator, putative GN=TGME49_249900	TGME49_249900	1	0.00904634	40.693	K(1)GNADSQLMNTAK	2	-0.08281	1
TGME49_250770-t26_1-p1	315	K	eukaryotic initiation factor-4A, putative GN=TGME49_250770	TGME49_250770	1	0.0002933	44.238	DFTVSSMHGDMDQK(1)SR	3	-0.049654	1
TGME49_250770-t26_1-p1	174	K	eukaryotic initiation factor-4A, putative GN=TGME49_250770	TGME49_250770	1	0.0141406	67.334	VHDMMEK(1)R	2	0.40377	1
TGME49_251500-t26_1-p1	499	K	eukaryotic initiation factor-3, subunit 3, putative GN=TGME49_251500	TGME49_251500	1	0.0129571	66.299	ESLK(1)QQQLQK	2	0.22282	1
TGME49_251630-t26_1-p1	876	K	slc30a2 protein GN=TGME49_251630	TGME49_251630	1	0.00149603	92.538	K(1)ATVLCQR	2	0.22694	1
TGME49_251680-t26_1-p1	122	K	histamine-releasing factor, putative GN=TGME49_251680	TGME49_251680	1	0.00467408	53.034	FMSGAQALVK(1)K	2	1.0458	1
TGME49_251690-t26_1-p1	87	K	seryl-tRNA synthetase, cytoplasmic, putative GN=TGME49_251690	TGME49_251690	1	0.0323748	93.429	SAELK(1)QR	2	-0.23758	1
TGME49_251690-t26_1-p1	62	K	seryl-tRNA synthetase, cytoplasmic, putative GN=TGME49_251690	TGME49_251690	1	0.000103157	83.692	ELNAVNK(1)EIGQR	2	0.72243	1
TGME49_251690-t26_1-p1	55	K	seryl-tRNA synthetase, cytoplasmic, putative GN=TGME49_251690	TGME49_251690	1	0.00111384	89.679	K(1)ELNAVNK	2	0.33322	1
TGME49_251810-t26_1-p1	69	K	translation initiation factor eIF-5A, putative GN=TGME49_251810	TGME49_251810	1	1.08413e-06	54.898	AHIVGLDIFTGK(1)K	3	0.8929	1
TGME49_251810-t26_1-p1	70	K	translation initiation factor eIF-5A, putative GN=TGME49_251810	TGME49_251810	1	7.91795e-22	91.565	K(1)YEDVCPTSHNMEVPNVK	3	0.60395	1
TGME49_251810-t26_1-p1	41	K	translation initiation factor eIF-5A, putative GN=TGME49_251810	TGME49_251810	1	0.00127643	63.614	GNPCK(1)VVDYSTSK	2	-0.17838	2
TGME49_251870-t26_1-p1	99	K	histone H2Bb GN=TGME49_251870	TGME49_251870	1	0.00122985	48.354	LVLPGELAK(1)HAVSEGTK	2	1.2114	1
TGME49_251870-t26_1-p1	37	K	histone H2Bb GN=TGME49_251870	TGME49_251870	1	0.000195215	63.681	VLK(1)QVHPETGISK	2	0.73096	3
TGME49_251870-t26_1-p1	107	K	histone H2Bb GN=TGME49_251870	TGME49_251870	1	3.96051e-06	83.351	HAVSEGTK(1)AVTK	2	0.21306	3
TGME49_251930-t26_1-p1	339	K	enoyl-acyl carrier reductase ENR GN=TGME49_251930	TGME49_251930	1	8.101e-09	124.07	AASAIGK(1)SGEK	2	0.088725	3
TGME49_253430-t26_1-p1	513	K	asparagine synthetase, putative GN=TGME49_253430	TGME49_253430	1	0.00620359	50.831	NAK(1)LLFPTNTPVTK	2	-0.02916	1
TGME49_254570-t26_1-p1	1584	K	hypothetical protein GN=TGME49_254570	TGME49_254570	1	0.00955659	51.03	AATLAAQEQQK(1)MR	2	0.8319	1
TGME49_256050-t26_1-p1	116	K	signal recognition particle 14kd protein GN=TGME49_256050	TGME49_256050	1	3.50494e-05	44.341	THPTTNCPEAK(1)SSDVIQSPGNK	3	0.020933	1
TGME49_256760-t26_1-p1	211	K	pyruvate kinase PyK1 GN=TGME49_256760	TGME49_256760	1	0.00250841	80.706	K(1)NMNLPNVK	2	0.12253	1
TGME49_256840-t26_1-p1	396	K	Putative transmembrane protein (Fragment)(predict) GN=TGME49_256840	TGME49_256840	1	0.000287962	60.764	ATDAFADAASK(1)TFLK	2	-0.029488	2
TGME49_256990-t26_1-p1	516	K	glycyl-tRNA synthetase GN=TGME49_256990	TGME49_256990	1	0.0270083	60.345	VSK(1)VDLVASR	2	0.38203	2
TGME49_256990-t26_1-p1	513	K	glycyl-tRNA synthetase GN=TGME49_256990	TGME49_256990	1	0.00259164	59.728	SAFDLTSHSK(1)VSK	2	0.52591	1
TGME49_257090-t26_1-p1	225	K	NAC domain-containing protein GN=TGME49_257090	TGME49_257090	1	0.010716	78.149	LQLTLK(1)R	2	-0.30628	1
TGME49_257380-t26_1-p1	80	K	Inhibitor of cysteine protease 1(predict) GN=TGME49_257380	TGME49_257380	1	0.000415855	49.223	VK(1)TVTFTDPPHDK	3	-0.26779	1
TGME49_260440-t26_1-p1	266	K	nuclear factor NF3 GN=TGME49_260440	TGME49_260440	1	0.010317	44.543	SALVDFLK(1)K	2	-1.7023	2
TGME49_260440-t26_1-p1	236	K	nuclear factor NF3 GN=TGME49_260440	TGME49_260440	1	0.000228162	71.558	AVEVAQASNK(1)K	2	-0.44582	1
TGME49_260440-t26_1-p1	226	K	nuclear factor NF3 GN=TGME49_260440	TGME49_260440	1	0.00385314	56.527	K(1)AVEVAQASNK	2	0.16093	1
TGME49_261570-t26_1-p1	216	K	ribosomal protein RPL7A GN=TGME49_261570	TGME49_261570	1	8.37295e-06	86.548	K(1)EDQAELEAQCK	2	0.61936	1
TGME49_261710-t26_1-p1	17	K	ankyrin repeat-containing protein GN=TGME49_261710	TGME49_261710	1	0.0108529	58.079	SVIAGGSIK(1)TIK	2	0.81564	1
TGME49_262690-t26_1-p1	135	K	ribosomal protein RPL27 GN=TGME49_262690	TGME49_262690	1	0.00407474	87.568	VSK(1)DLLFLR	2	0.71622	1
TGME49_263060-t26_1-p1	825	K	Proteasome/cyclosome repeat-containing protein GN=TGME49_263060	TGME49_263060	1	0.000917872	45.614	VIADK(1)HEDVMAR	3	0.25407	1
TGME49_263070-t26_1-p1	296	K	CMGC kinase, CK2 family GN=TGME49_263070	TGME49_263070	1	0.0223978	56.569	LLDVVK(1)DPASR	2	0.26151	2
TGME49_263090-t26_1-p1	142	K	14-3-3 protein GN=TGME49_263090	TGME49_263090	1	2.42894e-17	150.46	ELSK(1)QHMQNK	2	-0.14797	4
TGME49_263090-t26_1-p1	138	K	14-3-3 protein GN=TGME49_263090	TGME49_263090	1	0.000382366	72.898	IISSVEQK(1)ELSK	3	-0.94596	2
TGME49_263090-t26_1-p1	211	K	14-3-3 protein GN=TGME49_263090	TGME49_263090	1	3.66103e-08	82.59	K(1)QAADQAQESYQK	2	0.45469	1
TGME49_263300-t26_1-p1	74	K	eukaryotic porin protein GN=TGME49_263300	TGME49_263300	1	0.0254068	45.614	MMAMGK(1)STIDVK	2	-1.1662	1
TGME49_263300-t26_1-p1	57	K	eukaryotic porin protein GN=TGME49_263300	TGME49_263300	1	3.23285e-07	79.317	LK(1)YCVSDVTTEVK	2	0.25332	2
TGME49_263300-t26_1-p1	242	K	eukaryotic porin protein GN=TGME49_263300	TGME49_263300	1	0.0132093	102.01	AK(1)LTQNAR	2	-2.6884	1
TGME49_263470-t26_1-p1	169	K	ubiquitin carboxyl-terminal hydrolase UCHL3 GN=TGME49_263470	TGME49_263470	1	0.000230087	40.968	SLASAHK(1)SFEQQGQSAVPPR	3	0.98032	1
TGME49_263870-t26_1-p1	844	K	glutamate-tRNA ligase GN=TGME49_263870	TGME49_263870	1	0.015702	49.025	LSGAK(1)ITGK	2	1.0754	1
TGME49_264190-t26_1-p1	727	K	TRUD domain-containing protein(predict) GN=TGME49_264190	TGME49_264190	1	0.0201404	60.102	K(1)PPCVVLK	2	0.43821	2
TGME49_265450-t26_1-p1	110	K	hexokinase GN=TGME49_265450	TGME49_265450	1	0.00027696	85.554	MEIIQDK(1)ICLR	2	-0.64458	2
TGME49_267690-t26_1-p1	1505	K	Putative transmembrane protein(predict) GN=TGME49_267690	TGME49_267690	1	0.00114189	69.346	HLK(1)EEVVIR	3	0.45111	1
TGME49_268200-t26_1-p1	246	K	RNA recognition motif-containing protein GN=TGME49_268200	TGME49_268200	1	2.07002e-05	69.331	DSATGTGK(1)GCAFVK	2	0.12219	2
TGME49_268200-t26_1-p1	56	K	RNA recognition motif-containing protein GN=TGME49_268200	TGME49_268200	1	1.2154e-18	78.552	ETGCAHLGAQGPK(1)AASPAPAK	3	-0.64806	1
TGME49_268370-t26_1-p1	5977	K	non-specific serine/threonine protein kinase GN=TGME49_268370	TGME49_268370	1	0.00981245	79.451	K(1)AEVAGR	2	0.34061	2
TGME49_268690-t26_1-p1	536	K	Putative transmembrane protein(predict) GN=TGME49_268690	TGME49_268690	1	0.0008582	46.88	HHDK(1)GSGSMEIR	3	-0.22365	1
TGME49_268950-t26_1-p1	41	K	La domain protein(predict) GN=TGME49_268950	TGME49_268950	1	3.26771e-05	89.911	HEGK(1)NVCNEEK	2	0.17475	4
TGME49_268950-t26_1-p1	48	K	La domain protein(predict) GN=TGME49_268950	TGME49_268950	1	3.1166e-05	90.412	NVCNEEK(1)ELSR	2	-0.03992	3
TGME49_269190-t26_1-p1	861	K	glyceraldehyde-3-phosphate dehydrogenase GAPDH2 GN=TGME49_269190	TGME49_269190	1	6.13865e-09	58.093	AAAGNIIPSATGAAK(1)AVAR	3	0.2274	1
TGME49_269190-t26_1-p1	760	K	glyceraldehyde-3-phosphate dehydrogenase GAPDH2 GN=TGME49_269190	TGME49_269190	1	0.000456518	41.798	HVNRPGGAK(1)HAIISAPAK	4	1.0393	1
TGME49_269650-t26_1-p1	407	K	FFD and TFG box motifs protein GN=TGME49_269650	TGME49_269650	1	0.00694577	42.314	GVECGEELGGEK(1)K	2	-0.15701	1
TGME49_270240-t26_1-p1	215	K	MAG1 GN=TGME49_270240	TGME49_270240	1	0.0141557	81.017	AVK(1)QLEAIK	2	0.27073	1
TGME49_270510-t26_1-p1	261	K	asparaginyl-tRNA synthetase (NOB+tRNA synthase) GN=TGME49_270510	TGME49_270510	1	8.8686e-16	118.71	SPAK(1)GQAVELAVR	2	1.1769	2
TGME49_271290-t26_1-p1	285	K	SURP motif domain-containing protein(predict) GN=TGME49_271290	TGME49_271290	1	0.000168824	66.826	K(1)SEHVGEEWIER	3	0.40146	1
TGME49_271350-t26_1-p1	374	K	bifunctional protein FolC subfamily protein GN=TGME49_271350	TGME49_271350	1	0.000320489	120.06	VVVSLTK(1)ER	2	0.19961	2
TGME49_271600-t26_1-p1	496	K	hypothetical protein GN=TGME49_271600	TGME49_271600	1	0.00928413	46.88	LQK(1)LASLLQK	2	1.5545	1
TGME49_272290-t26_1-p1	260	K	pyruvate dehydrogenase complex subunit PD-HE1Beta GN=TGME49_272290	TGME49_272290	1	1.00041e-06	61.657	GPGGVGK(1)QLGPEHSQR	3	0.054698	1
TGME49_272390-t26_1-p1	354	K	Apicoplast Toc75(predict) GN=TGME49_272390	TGME49_272390	1	0.00173768	55.66	QRPPK(1)TAPDSPR	3	0.33885	1
TGME49_272660-t26_1-p1	96	K	Inhibitor of cysteine protease 2(predict) GN=TGME49_272660	TGME49_272660	1	0.00600587	89.047	AAQEK(1)PLK	2	1.2928	1
TGME49_272910-t26_1-p1	234	K	T-complex protein 1 delta subunit GN=TGME49_272910	TGME49_272910	1	0.000278316	85.536	GIVMVEQK(1)VSK	2	0.26422	3
TGME49_273760-t26_1-p1	499	K	heat shock protein HSP70 GN=TGME49_273760	TGME49_273760	1	0.00601191	51.089	STGK(1)SNQITITNDK	2	0.015467	1
TGME49_273760-t26_1-p1	526	K	heat shock protein HSP70 GN=TGME49_273760	TGME49_273760	0.925961	0.000209816	50.358	MVQEAEK(0.926)YK(0.074)AEDEQNK	3	-0.55655	1
TGME49_273760-t26_1-p1	56	K	heat shock protein HSP70 GN=TGME49_273760	TGME49_273760	1	0.0040958	64.104	LVGDAAK(1)NQVAR	2	0.94197	2
TGME49_273760-t26_1-p1	253	K	heat shock protein HSP70 GN=TGME49_273760	TGME49_273760	1	0.00577527	86.463	GK(1)DISTNSR	2	1.3657	1
TGME49_273760-t26_1-p1	599	K	heat shock protein HSP70 GN=TGME49_273760	TGME49_273760	1	0.0213486	43.794	QK(1)EVESVCTPIITK	2	0.12792	1
TGME49_276110-t26_1-p1	193	K	cytochrome b5 family heme/steroid binding domain-containing protein GN=TGME49_276110	TGME49_276110	1	0.00461217	53.3	K(1)NCCTSATATK	2	-0.70271	1
TGME49_276890-t26_1-p1	99	K	hypothetical protein GN=TGME49_276890	TGME49_276890	1	0.0278823	42.802	RPPLVNK(1)PK	3	-0.55863	1
TGME49_278050-t26_1-p1	115	K	proteasome subunit alpha type 1, putative GN=TGME49_278050	TGME49_278050	1	0.00147903	54.103	LVLMVADK(1)SQANTQR	2	-0.033881	1
TGME49_278720-t26_1-p1	627	K	hypothetical protein GN=TGME49_278720	TGME49_278720	1	0.0187466	61.78	K(1)NMPGLIR	2	-0.26909	2
TGME49_279390-t26_1-p1	410	K	proliferation-associated protein 2G4, putative GN=TGME49_279390	TGME49_279390	1	7.4801e-05	71.279	FTLLLLPTGTK(1)K	2	0.60099	2
TGME49_280370-t26_1-p1	340	K	KH domain containing protein(predict) GN=TGME49_280370	TGME49_280370	1	0.0155992	65.179	VSEAK(1)IAVLR	2	0.40721	1
TGME49_280560-t26_1-p1	103	K	selenide, water dikinase GN=TGME49_280560	TGME49_280560	1	0.0018731	46.318	K(1)LIFCDDGRPPLR	3	-0.097843	2
TGME49_280560-t26_1-p1	860	K	selenide, water dikinase GN=TGME49_280560	TGME49_280560	1	0.000219175	53.554	RPTSDK(1)ESDGVCPGR	3	0.23601	1
TGME49_280560-t26_1-p1	691	K	selenide, water dikinase GN=TGME49_280560	TGME49_280560	1	3.14398e-16	89.859	TACGK(1)SGVSHAECIQTK	3	-0.39737	1
TGME49_280560-t26_1-p1	43	K	selenide, water dikinase GN=TGME49_280560	TGME49_280560	1	0.0151729	86.205	QPEK(1)GMR	2	-0.26128	2
TGME49_280560-t26_1-p1	744	K	selenide, water dikinase GN=TGME49_280560	TGME49_280560	1	9.38882e-06	74.141	CGGCGAK(1)VPSTVLR	2	-0.66699	1
TGME49_285980-t26_1-p1	43	K	glucosephosphate-mutase GPM1 GN=TGME49_285980	TGME49_285980	1	0.00164129	50.358	PTTAYQDQK(1)PGTSGLR	2	-0.17256	1
TGME49_286580-t26_1-p1	278	K	Inner membrane complex protein 17(predict) GN=TGME49_286580	TGME49_286580	1	6.34256e-06	69.111	K(1)EVPVEHITVQAR	2	0.06683	3
TGME49_286750-t26_1-p1	414	K	MA3 domain-containing protein GN=TGME49_286750	TGME49_286750	1	0.014236	67.207	K(1)EAACILR	2	-0.4763	1
TGME49_287270-t26_1-p1	459	K	Apicoplast PPC1(predict) GN=TGME49_287270	TGME49_287270	1	0.00994824	58.885	AVATSSIAK(1)SAR	2	-0.20561	2
TGME49_287500-t26_1-p1	59	K	T complex chaperonin, putative GN=TGME49_287500	TGME49_287500	1	0.00795772	63.624	LVVTSLGK(1)R	2	0.26118	2
TGME49_288030-t26_1-p1	306	K	Putative transmembrane protein(predict) GN=TGME49_288030	TGME49_288030	1	0.0106332	67.519	DCALEK(1)GSCR	2	0.1518	1
TGME49_288360-t26_1-p1	324	K	tryptophanyl-tRNA synthetase (TrpRS2) GN=TGME49_288360	TGME49_288360	1	0.00677548	77.662	IEALTGK(1)R	2	-0.5941	2
TGME49_288380-t26_1-p1	553	K	heat shock protein HSP90 GN=TGME49_288380	TGME49_288380	1	0.0071982	43.613	LMK(1)EVLHDK	3	-0.60948	1
TGME49_288380-t26_1-p1	384	K	heat shock protein HSP90 GN=TGME49_288380	TGME49_288380	1	0.00736779	77.744	ESLQQNK(1)ILK	2	0.5109	2
TGME49_288380-t26_1-p1	524	K	heat shock protein HSP90 GN=TGME49_288380	TGME49_288380	1	0.00219537	56.339	K(1)GLELEDDEEEK	2	-0.59868	1
TGME49_288630-t26_1-p1	18	K	nucleosome assembly protein (NAP), putative GN=TGME49_288630	TGME49_288630	1	8.57835e-10	115.12	NNAEAAACQK(1)QR	3	0.1112	4
TGME49_289000-t26_1-p1	521	K	hypothetical protein GN=TGME49_289000	TGME49_289000	1	5.08241e-06	53.565	VATK(1)ADQADHSCPQGQGR	3	0.2706	1
TGME49_289000-t26_1-p1	372	K	hypothetical protein GN=TGME49_289000	TGME49_289000	1	3.52521e-13	99.392	EHEGNEK(1)TEPCSEYR	3	-0.097544	2
TGME49_289330-t26_1-p1	1231	K	ubiquitin carboxyl-terminal hydrolase family 2 protein GN=TGME49_289330	TGME49_289330	1	0.00174867	45.618	K(1)VGEDPSDVPEALR	2	-0.00047744	1
TGME49_289650-t26_1-p1	135	K	PEP-carboxykinase I GN=TGME49_289650	TGME49_289650	0.998669	1.06598e-08	56.681	QIDANLQHHK(0.001)PGDCPLTK(0.999)K	4	0.44241	1
TGME49_289690-t26_1-p1	370	K	glyceraldehyde-3-phosphate dehydrogenase GAPDH1 GN=TGME49_289690	TGME49_289690	1	0.0192108	50.806	AVGK(1)IIPSLNGK	2	0.69762	1
TGME49_289690-t26_1-p1	366	K	glyceraldehyde-3-phosphate dehydrogenase GAPDH1 GN=TGME49_289690	TGME49_289690	1	1.45018e-08	66.467	SAGVNIIPASTGAAK(1)AVGK	2	0.70775	2
TGME49_289690-t26_1-p1	405	K	glyceraldehyde-3-phosphate dehydrogenase GAPDH1 GN=TGME49_289690	TGME49_289690	1	0.00994824	58.885	PAK(1)YEDIVAAVK	2	0.73589	1
TGME49_289690-t26_1-p1	255	K	glyceraldehyde-3-phosphate dehydrogenase GAPDH1 GN=TGME49_289690	TGME49_289690	1	5.36715e-09	104.95	EK(1)AQAHLTNGAK	2	-0.14363	2
TGME49_289690-t26_1-p1	211	K	glyceraldehyde-3-phosphate dehydrogenase GAPDH1 GN=TGME49_289690	TGME49_289690	1	4.4908e-09	64.318	YDSVHGHYPGEVSHK(1)DGK	4	-0.54314	2
TGME49_289750-t26_1-p1	48	K	ribosomal-ubiquitin protein RPL40 GN=TGME49_289750	TGME49_289750	1	0.000544334	68.044	LIFAGK(1)QLEDGR	2	-0.069895	2
TGME49_290660-t26_1-p1	99	K	RNA recognition motif-containing protein GN=TGME49_290660	TGME49_290660	1	0.000301655	75.316	LNELVVK(1)NNTQK	2	-0.092863	1
TGME49_290670-t26_1-p1	721	K	leucyl aminopeptidase LAP GN=TGME49_290670	TGME49_290670	1	0.0209561	49.298	CADMNNVGGK(1)GK	2	-0.3542	1
TGME49_290670-t26_1-p1	317	K	leucyl aminopeptidase LAP GN=TGME49_290670	TGME49_290670	1	0.0223978	56.569	DAVEAADFK(1)AK	2	0.40707	1
TGME49_290670-t26_1-p1	386	K	leucyl aminopeptidase LAP GN=TGME49_290670	TGME49_290670	1	6.63024e-23	90.475	TVAVVLPTCQK(1)VCPSAEGQR	2	-0.56852	2
TGME49_290950-t26_1-p1	1488	K	clathrin heavy chain, putative GN=TGME49_290950	TGME49_290950	1	0.00146691	43.761	AGHLAVVEK(1)YLR	3	-1.7126	1
TGME49_290950-t26_1-p1	1479	K	clathrin heavy chain, putative GN=TGME49_290950	TGME49_290950	1	0.00561387	57.106	K(1)AGHLAVVEK	3	-0.26396	1
TGME49_291680-t26_1-p1	429	K	Sec23/Sec24 trunk domain-containing protein GN=TGME49_291680	TGME49_291680	1	0.0296463	59.227	IEVLCSK(1)EFK	2	-0.2359	1
TGME49_293320-t26_1-p1	804	K	Putative transmembrane protein(predict) GN=TGME49_293320	TGME49_293320	1	0.00719748	43.592	K(1)ADALPESGGEK	2	1.3571	1
TGME49_293590-t26_1-p1	452	K	3-oxoacyl-acyl-carrier protein synthase I/II, putative GN=TGME49_293590	TGME49_293590	1	0.0186951	51.276	K(1)VFGDEQAR	2	1.2439	1
TGME49_293590-t26_1-p1	125	K	3-oxoacyl-acyl-carrier protein synthase I/II, putative GN=TGME49_293590	TGME49_293590	1	2.86163e-10	92.939	SSTETCGVK(1)GRPR	3	-0.50734	3
TGME49_293690-t26_1-p1	96	K	profilin PRF GN=TGME49_293690	TGME49_293690	1	0.030946	49.57	YK(1)VVRPEK	3	-0.56407	1
TGME49_294620-t26_1-p1	641	K	eukaryotic initiation factor-3, subunit 8, putative GN=TGME49_294620	TGME49_294620	1	8.65454e-05	60.307	HK(1)ELLAQGLSNLK	3	0.66704	1
TGME49_294800-t26_1-p1	371	K	elongation factor 1-alpha (EF-1-ALPHA), putative GN=TGME49_294800	TGME49_294800	1	0.00970105	70.438	SGK(1)TLEEAPK	2	0.33285	1
TGME49_294800-t26_1-p1	437	K	elongation factor 1-alpha (EF-1-ALPHA), putative GN=TGME49_294800	TGME49_294800	0.999991	0.00204536	59.864	KEPGAGSK(1)VTK	3	0.42591	2
TGME49_294800-t26_1-p1	225	K	elongation factor 1-alpha (EF-1-ALPHA), putative GN=TGME49_294800	TGME49_294800	1	6.56538e-12	68.42	TLVEALDTMEAPK(1)RPSDK	3	0.16638	1
TGME49_294800-t26_1-p1	230	K	elongation factor 1-alpha (EF-1-ALPHA), putative GN=TGME49_294800	TGME49_294800	1	0.0124658	43.769	RPSDK(1)PLR	3	-0.058278	1
TGME49_294800-t26_1-p1	425	K	elongation factor 1-alpha (EF-1-ALPHA), putative GN=TGME49_294800	TGME49_294800	1	4.21487e-07	75.445	QTVAVGVIK(1)SVEK	3	0.15953	3
TGME49_294800-t26_1-p1	316	K	elongation factor 1-alpha (EF-1-ALPHA), putative GN=TGME49_294800	TGME49_294800	1	0.00033812	66.387	GYVASDSK(1)NDPAK	2	0.29994	2
TGME49_294800-t26_1-p1	212	K	elongation factor 1-alpha (EF-1-ALPHA), putative GN=TGME49_294800	TGME49_294800	1	0.000371452	58.848	GK(1)TLVEALDTMEAPK	2	0.093468	1
TGME49_294800-t26_1-p1	44	K	elongation factor 1-alpha (EF-1-ALPHA), putative GN=TGME49_294800	TGME49_294800	1	0.00821614	75.088	FEK(1)ESSEMGK	2	0.24736	1
TGME49_294800-t26_1-p1	378	K	elongation factor 1-alpha (EF-1-ALPHA), putative GN=TGME49_294800	TGME49_294800	1	0.0130327	66.267	TLEEAPK(1)CIK	2	1.0764	1
TGME49_295650-t26_1-p1	206	K	hypothetical protein GN=TGME49_295650	TGME49_295650	1	2.1221e-05	80.387	LDKPDVCQQK(1)DR	3	0.61323	1
TGME49_295710-t26_1-p1	3403	K	HECT-domain (ubiquitin-transferase) domain-containing protein GN=TGME49_295710	TGME49_295710	1	0.0247389	54.898	TALGAK(1)TGSCK	2	1.0531	1
TGME49_295710-t26_1-p1	8081	K	HECT-domain (ubiquitin-transferase) domain-containing protein GN=TGME49_295710	TGME49_295710	1	0.00515021	51.726	K(1)LLLAITEGK	2	0.66383	1
TGME49_297060-t26_1-p1	189	K	phosphoglycerate mutase PGMII GN=TGME49_297060	TGME49_297060	1	5.36551e-26	124.63	HYGALQGLNK(1)AETAAK	2	0.37151	3
TGME49_297060-t26_1-p1	202	K	phosphoglycerate mutase PGMII GN=TGME49_297060	TGME49_297060	1	0.001161	58.172	HGDEQVK(1)IWR	3	0.19371	1
TGME49_300140-t26_1-p1	200	K	elongation factor 1-gamma, putative GN=TGME49_300140	TGME49_300140	1	0.026529	42.947	IFGEAK(1)AAPQAAAK	2	-0.034	2
TGME49_300140-t26_1-p1	190	K	elongation factor 1-gamma, putative GN=TGME49_300140	TGME49_300140	1	0.00902459	59.709	FYETVVNQK(1)SFK	2	0.1279	2
TGME49_300140-t26_1-p1	217	K	elongation factor 1-gamma, putative GN=TGME49_300140	TGME49_300140	1	0.000973252	50.077	AAAK(1)PAQSAGDDEEPAK	2	0.16171	1
TGME49_300140-t26_1-p1	194	K	elongation factor 1-gamma, putative GN=TGME49_300140	TGME49_300140	1	0.0284602	68.787	K(1)IFGEAK	2	0.18115	1
TGME49_300140-t26_1-p1	230	K	elongation factor 1-gamma, putative GN=TGME49_300140	TGME49_300140	0.788083	0.000140055	45.363	PAQSAGDDEEPAK(0.788)K(0.212)PAVK	3	0.60823	1
TGME49_305980-t26_1-p1	631	K	pyruvate dehydrogenase complex subunit PDH-E3I GN=TGME49_305980	TGME49_305980	1	0.00873115	74.92	K(1)AVGMNAH	2	-0.13814	1
TGME49_306560-t26_1-p1	346	K	Nucleoporin FG repeat region protein(predict) GN=TGME49_306560	TGME49_306560	1	3.39944e-07	98.942	LQQLEQQVK(1)LLR	2	-0.15424	1
TGME49_307850-t26_1-p1	280	K	6-phosphogluconate dehydrogenase GN=TGME49_307850	TGME49_307850	1	0.0237434	46.89	ILDAAGSK(1)GTGK	2	0.52834	1
TGME49_307850-t26_1-p1	37	K	6-phosphogluconate dehydrogenase GN=TGME49_307850	TGME49_307850	1	2.6269e-06	103.13	TPSK(1)ITVAVQK	2	0.11781	1
TGME49_308870-t26_1-p1	215	K	Zinc finger (CCCH type) protein, putative(predict) GN=TGME49_308870	TGME49_308870	1	0.0308549	60.717	RK(1)EYEDR	3	0.70915	1
TGME49_309210-t26_1-p1	391	K	peroxiredoxin 6, putative GN=TGME49_309210	TGME49_309210	1	0.0321366	58.172	ECPSGK(1)NYLR	2	-0.27812	1
TGME49_309570-t26_1-p1	351	K	DEAD/DEAH box helicase domain-containing protein GN=TGME49_309570	TGME49_309570	1	3.10858e-14	103.13	LQQTTETALCAEK(1)K	2	-0.14502	2
TGME49_309730-t26_1-p1	270	K	thioredoxin reductase GN=TGME49_309730	TGME49_309730	1	0.00170526	58.885	K(1)AGVTYINAYAK	2	1.231	2
TGME49_310030-t26_1-p1	72	K	cyclase-associated protein, putative GN=TGME49_310030	TGME49_310030	1	0.0162448	79.659	IDSATMK(1)QK	2	0.75291	1
TGME49_310030-t26_1-p1	126	K	cyclase-associated protein, putative GN=TGME49_310030	TGME49_310030	1	0.000118496	54.764	FQVK(1)GTCHSIAIDK	3	0.1367	1
TGME49_310490-t26_1-p1	124	K	ribosomal protein RPL27A GN=TGME49_310490	TGME49_310490	1	0.0141096	99.442	IPVIVK(1)AR	2	-0.70106	1
TGME49_310640-t26_1-p1	147	K	phosphorylase family protein GN=TGME49_310640	TGME49_310640	1	2.21868e-07	75.548	NYCHFDGEAALGNK(1)R	2	0.31287	2
TGME49_310700-t26_1-p1	140	K	serine/threonine phosophatase PP1 GN=TGME49_310700	TGME49_310700	1	0.00688246	55.261	IYGFYDECK(1)R	2	0.45625	2
TGME49_311240-t26_1-p1	46	K	DnaJ family chaperone, putative GN=TGME49_311240	TGME49_311240	1	0.0120785	72.29	TASVADIK(1)K	2	0.82573	1
TGME49_311240-t26_1-p1	242	K	DnaJ family chaperone, putative GN=TGME49_311240	TGME49_311240	1	0.00639753	53.751	NHHK(1)VIFR	3	-1.6406	2
TGME49_311290-t26_1-p1	261	K	protein tyrosine phosphatase family protein, ptpla protein GN=TGME49_311290	TGME49_311290	1	0.00678385	42.242	K(1)HLYGAGSEEK	3	-0.57712	2
TGME49_311720-t26_1-p1	276	K	chaperonin protein BiP GN=TGME49_311720	TGME49_311720	1	0.00235822	47.712	VMDHFIK(1)LVK	3	-0.078749	1
TGME49_311720-t26_1-p1	116	K	chaperonin protein BiP GN=TGME49_311720	TGME49_311720	1	0.0164264	85.29	FNEK(1)EVQK	2	0.72969	1
TGME49_311810-t26_1-p1	225	K	hypothetical protein GN=TGME49_311810	TGME49_311810	1	0.0063441	56.205	VQQLGEEVK(1)K	2	0.89923	1
TGME49_312600-t26_1-p1	10	K	heat shock protein HSP21 GN=TGME49_312600	TGME49_312600	1	0.000435447	43.476	ASPTSASSK(1)APGTESEACGHR	3	-0.080326	1
TGME49_312630-t26_1-p1	2036	K	anonymous antigen-1, putative GN=TGME49_312630	TGME49_312630	1	2.83991e-14	104.88	GLSNYDGSEEK(1)TAIR	2	0.17408	3
TGME49_313290-t26_1-p1	334	K	MORN repeat-containing protein GN=TGME49_313290	TGME49_313290	1	0.00341098	49.595	GK(1)MDGEVVEISPSGK	2	2.094	1
TGME49_313370-t26_1-p1	1436	K	Leucine rich repeat protein(predict) GN=TGME49_313370	TGME49_313370	1	3.37291e-07	46.862	SAHGGGPGSTPGDALMK(1)EDLLR	3	0.38886	2
TGME49_313640-t26_1-p1	168	K	Putative transmembrane protein(predict) GN=TGME49_313640	TGME49_313640	1	0.00922615	93.178	DVTEAK(1)GR	2	0.56644	2
TGME49_313640-t26_1-p1	184	K	Putative transmembrane protein(predict) GN=TGME49_313640	TGME49_313640	1	4.61236e-09	51.473	SVNPHQQLGELGTK(1)SAGEESCGTGNK	3	0.3903	1
TGME49_313870-t26_1-p1	5	K	zinc finger, C3HC4 type (RING finger) domain-containing protein GN=TGME49_313870	TGME49_313870	0.999498	0.0217494	46.663	K(0.001)FGK(0.999)SIR	2	-0.079048	2
TGME49_314100-t26_1-p1	313	K	tetratricopeptide repeat-containing protein GN=TGME49_314100	TGME49_314100	1	0.0295351	68.224	IINETK(1)K	2	1.1061	1
TGME49_314530-t26_1-p1	2655	K	RPAP1 family, C-terminal protein GN=TGME49_314530	TGME49_314530	1	0.0140316	46.892	SVENSSLEK(1)DFAR	2	0.33584	1
TGME49_314890-t26_1-p1	1188	K	ThiF family protein GN=TGME49_314890	TGME49_314890	1	0.0244925	46.844	ALDSLLLK(1)R	2	0.27873	2
TGME49_315860-t26_1-p1	3202	K	EF hand domain-containing protein GN=TGME49_315860	TGME49_315860	1	0.0272087	43.308	NK(1)SVAILR	2	-0.55198	1
TGME49_316540-t26_1-p1	108	K	IMC sub-compartment protein ISP3 GN=TGME49_316540	TGME49_316540	1	0.00407852	66.004	SSECADSK(1)MLR	2	0.25493	1
TGME49_318230-t26_1-p1	131	K	phosphoglycerate kinase PGKI GN=TGME49_318230	TGME49_318230	1	5.97962e-05	50.305	FHIEEEGK(1)GVDEQGNK	3	0.90176	2
TGME49_318230-t26_1-p1	141	K	phosphoglycerate kinase PGKI GN=TGME49_318230	TGME49_318230	1	0.028305	59.796	IK(1)ASPEAIAK	2	0.44395	1
TGME49_318230-t26_1-p1	139	K	phosphoglycerate kinase PGKI GN=TGME49_318230	TGME49_318230	1	1.61565e-07	122.69	GVDEQGNK(1)IK	2	0.074617	2
TGME49_320600-t26_1-p1	146	K	cold-shock DNA-binding domain-containing protein GN=TGME49_320600	TGME49_320600	1	0.00202318	40.137	K(1)AVSVTGPNGDFVQGEPR	2	0.05689	1
TGME49_321500-t26_1-p1	219	K	RNA recognition motif-containing protein GN=TGME49_321500	TGME49_321500	1	0.0298875	80.755	FAESK(1)AAR	2	-0.34647	1
TGME49_321500-t26_1-p1	178	K	RNA recognition motif-containing protein GN=TGME49_321500	TGME49_321500	1	1.4922e-09	91.355	DNVQNTGK(1)GCCFVK	2	-0.78311	2
TGME49_321520-t26_1-p1	206	K	CS domain-containing protein(predict) GN=TGME49_321520	TGME49_321520	1	2.41196e-06	104.24	ECEGEK(1)AEEHK	2	-0.50864	2
TGME49_321640-t26_1-p1	780	K	cell division protein CDC48AP GN=TGME49_321640	TGME49_321640	1	0.0310541	44.925	TLLAK(1)AVANECK	2	-0.10766	1

## Sheet: pep_quant
ID	Sequence	Length	Modifications	Modified sequence	Protein accession	Protein description	Charge	m/z	Mass error [ppm]	PEP	Score	MS/MS Count
0	AAAAIPAAASR	11	Unmodified	_AAAAIPAAASR_	TGME49_215785-t26_1-p1	rhoptry protein ROP2A GN=TGME49_215785	2	485.277	-0.47612	0.0031133	60.305	1
1	AAAAIPAAASR	11	Unmodified	_AAAAIPAAASR_	TGME49_215785-t26_1-p1	rhoptry protein ROP2A GN=TGME49_215785	2	485.277	-0.012762	0.00016274	78.513	1
2	AAAGGSAAAGLR	12	Unmodified	_AAAGGSAAAGLR_	TGME49_269690-t26_1-p1	Putative transmembrane protein(predict) GN=TGME49_269690	2	486.765		3.9215e-06	63.473	1
3	AAAGNIIPSATGAAKAVAR	19	malon(K)	_AAAGNIIPSATGAAK(ma)AVAR_	TGME49_269190-t26_1-p1	glyceraldehyde-3-phosphate dehydrogenase GAPDH2 GN=TGME49_269190	3	599.327	0.22702	6.1387e-09	58.093	1
4	AAAKPAQSAGDDEEPAK	17	malon(K)	_AAAK(ma)PAQSAGDDEEPAK_	TGME49_300140-t26_1-p1	elongation factor 1-gamma, putative GN=TGME49_300140	2	871.397	0.16153	0.00097325	50.077	1
5	AAAPLTAEEQEAVQK	15	Unmodified	_AAAPLTAEEQEAVQK_	TGME49_244560-t26_1-p1	heat shock protein 90, putative GN=TGME49_244560	2	778.402	-2.2109	6.4466e-09	80.507	1
6	AAAQEGHLER	10	Unmodified	_AAAQEGHLER_	TGME49_220270-t26_1-p1	alveolin domain containing intermediate filament IMC6 GN=TGME49_220270	3	361.184	-2.5825	0.0027445	50.452	1
7	AAAQEGHLER	10	Unmodified	_AAAQEGHLER_	TGME49_220270-t26_1-p1	alveolin domain containing intermediate filament IMC6 GN=TGME49_220270	3	361.184	0.61684	0.0034964	45.829	1
8	AAAVGTPVFTR	11	Unmodified	_AAAVGTPVFTR_	TGME49_272400-t26_1-p1	casein kinase ii regulatory subunit protein GN=TGME49_272400	2	545.306	0.77382	0.016166	41.164	1
9	AAEDSSDIEK	10	Unmodified	_AAEDSSDIEK_	TGME49_209030-t26_1-p1	actin ACT1 GN=TGME49_209030	2	532.741	0.54807	7.2114e-05	91.549	1
10	AAEDSSDIEK	10	Unmodified	_AAEDSSDIEK_	TGME49_209030-t26_1-p1	actin ACT1 GN=TGME49_209030	2	532.741	0.18214	3.5732e-06	112.13	1
11	AAGIPLTK	8	Unmodified	_AAGIPLTK_	TGME49_226960-t26_1-p1	phosphofructokinase PFKII GN=TGME49_226960	2	385.742	0.093285	0.016477	67.897	1
12	AAGLLMK	7	Unmodified	_AAGLLMK_	TGME49_318230-t26_1-p1	phosphoglycerate kinase PGKI GN=TGME49_318230	2	352.212	1.9077	0.019202	75.311	1
13	AAGQVVFHAHVHVVPR	16	Unmodified	_AAGQVVFHAHVHVVPR_	TGME49_243580-t26_1-p1	Hit family protein involved in cell-cycle regulation, putative GN=TGME49_243580	4	431.743	-0.24024	0.00073032	44.925	1
14	AAHVPVPDFSQ	11	Unmodified	_AAHVPVPDFSQ_	TGME49_227620-t26_1-p1	dense granule protein GRA2 GN=TGME49_227620	2	584.293	0.9194	0.0025307	61.765	2
15	AAHVPVPDFSQ	11	Unmodified	_AAHVPVPDFSQ_	TGME49_227620-t26_1-p1	dense granule protein GRA2 GN=TGME49_227620	2	584.293	0.47595	0.00015319	79.148	2
16	AAHVPVPDFSQ	11	Unmodified	_AAHVPVPDFSQ_	TGME49_227620-t26_1-p1	dense granule protein GRA2 GN=TGME49_227620	2	584.293	2.0649	0.0032719	59.908	1
17	AAIQKQECVLQQQK	14	malon(K)	_AAIQK(ma)QECVLQQQK_	TGME49_224960-t26_1-p1	Preprotein translocase subunit Sec66(predict) GN=TGME49_224960	2	879.446	0.68077	2.1407e-05	69.03	1
18	AAIYIGPDR	9	Unmodified	_AAIYIGPDR_	TGME49_309210-t26_1-p1	peroxiredoxin 6, putative GN=TGME49_309210	2	488.267	-0.54813	0.019679	42.312	1
19	AAIYIGPDR	9	Unmodified	_AAIYIGPDR_	TGME49_309210-t26_1-p1	peroxiredoxin 6, putative GN=TGME49_309210	2	488.267	0.98247	0.002608	81.972	1
20	AALVDGIR	8	Unmodified	_AALVDGIR_	TGME49_204530-t26_1-p1	microneme protein MIC11 GN=TGME49_204530	2	407.743		0.0091205	71.501	1
21	AAPALEPPPSHAVAVDAPVVGGGK	24	Unmodified	_AAPALEPPPSHAVAVDAPVVGGGK_	TGME49_263810-t26_1-p1	Putative transmembrane protein(predict) GN=TGME49_263810	3	736.399	0.5698	0.0069061	28.748	1
22	AAQEKPLK	8	malon(K)	_AAQEK(ma)PLK_	TGME49_272660-t26_1-p1	Inhibitor of cysteine protease 2(predict) GN=TGME49_272660	2	485.764	1.2901	0.0060059	89.047	1
23	AASAIGKSGEK	11	malon(K)	_AASAIGK(ma)SGEK_	TGME49_251930-t26_1-p1	enoyl-acyl carrier reductase ENR GN=TGME49_251930	2	552.78	-0.2075	8.101e-09	124.07	1
24	AASAIGKSGEK	11	malon(K)	_AASAIGK(ma)SGEK_	TGME49_251930-t26_1-p1	enoyl-acyl carrier reductase ENR GN=TGME49_251930	2	552.78	-0.4615	2.5923e-05	92.151	1
25	AASAIGKSGEK	11	malon(K)	_AASAIGK(ma)SGEK_	TGME49_251930-t26_1-p1	enoyl-acyl carrier reductase ENR GN=TGME49_251930	2	552.78	0.088563	0.0059452	65.043	1
26	AASSSAVSGASSSPGSVK	18	Acetyl (Protein N-term)	_(ac)AASSSAVSGASSSPGSVK_	TGME49_274060-t26_1-p1	2-oxoglutarate/malate translocase OMT GN=TGME49_274060	2	789.884	0.0066708	6.9607e-09	57.525	1
27	AATGEEGEAQGSGLGPATR	19	Unmodified	_AATGEEGEAQGSGLGPATR_	TGME49_263700-t26_1-p1	ribosomal protein RPS14 GN=TGME49_263700	2	879.916	-0.12055	3.7538e-08	57.41	1
28	AATGEEGEAQGSGLGPATR	19	Unmodified	_AATGEEGEAQGSGLGPATR_	TGME49_263700-t26_1-p1	ribosomal protein RPS14 GN=TGME49_263700	2	879.916	-0.35411	3.7705e-08	57.366	1
29	AATLAAQEQQKMR	13	malon(K)	_AATLAAQEQQK(ma)MR_	TGME49_254570-t26_1-p1	hypothetical protein GN=TGME49_254570	2	766.38	0.83081	0.0095566	51.03	1
30	AATVAAGNELFK	12	Unmodified	_AATVAAGNELFK_	TGME49_288650-t26_1-p1	dense granule protein GRA12 GN=TGME49_288650	2	596.322	0.31059	0.0050778	46.063	1
31	AATVAAGNELFK	12	Unmodified	_AATVAAGNELFK_	TGME49_288650-t26_1-p1	dense granule protein GRA12 GN=TGME49_288650	2	596.322	1.4643	0.0013067	62.088	1
32	AAVSSLATR	9	Unmodified	_AAVSSLATR_	TGME49_278830-t26_1-p1	glucose-6-phosphate 1-dehydrogenase GN=TGME49_278830	2	438.251	-0.043302	0.0082737	65.535	1
33	AAVTGHPVR	9	Unmodified	_AAVTGHPVR_	TGME49_286450-t26_1-p1	dense granule protein GRA5 GN=TGME49_286450	2	454.259	0.012523	0.00067913	104.2	1
35	ACVFVPHTAGR	11	Unmodified	_ACVFVPHTAGR_	TGME49_242330-t26_1-p1	ribosomal protein RPS5 GN=TGME49_242330	3	405.541	-0.72727	0.0012972	53.567	1
36	ACVFVPHTAGR	11	Unmodified	_ACVFVPHTAGR_	TGME49_242330-t26_1-p1	ribosomal protein RPS5 GN=TGME49_242330	3	405.541	-0.50049	0.0013753	52.391	1
37	ADAGDAAANQPK	12	Acetyl (Protein N-term)	_(ac)ADAGDAAANQPK_	TGME49_213350-t26_1-p1	ribosomal protein RPS15 GN=TGME49_213350	2	585.773	0.020432	0.00030132	57.175	1
38	ADAGDAAANQPKR	13	Acetyl (Protein N-term),malon(K)	_(ac)ADAGDAAANQPK(ma)R_	TGME49_213350-t26_1-p1	ribosomal protein RPS15 GN=TGME49_213350	2	706.824	0.022022	0.001598	52.527	1
39	ADQLNVLVLNR	11	Unmodified	_ADQLNVLVLNR_	TGME49_267400-t26_1-p1	ribosomal protein RPL32 GN=TGME49_267400	2	627.862	0.64939	0.020511	38.875	1
40	ADQLNVLVLNR	11	Unmodified	_ADQLNVLVLNR_	TGME49_267400-t26_1-p1	ribosomal protein RPL32 GN=TGME49_267400	2	627.862	0.89066	0.0002835	70.942	1
41	ADSAAAVPIHPFRPR	15	Unmodified	_ADSAAAVPIHPFRPR_	TGME49_264660-t26_1-p1	SAG-related sequence SRS44 GN=TGME49_264660	4	401.972	0.18287	0.0080616	23.362	2
42	ADSGCVIGK	9	Unmodified	_ADSGCVIGK_	TGME49_205250-t26_1-p1	rhoptry protein ROP18 GN=TGME49_205250	2	453.721	0.049979	0.0048012	74.92	1
43	ADVFEDFQGR	10	Unmodified	_ADVFEDFQGR_	TGME49_262620-t26_1-p1	RNA recognition motif-containing protein GN=TGME49_262620	2	592.273	0.76574	0.013329	47.844	1
44	ADVFEDFQGR	10	Unmodified	_ADVFEDFQGR_	TGME49_262620-t26_1-p1	RNA recognition motif-containing protein GN=TGME49_262620	2	592.273	0.4895	0.00073923	83.869	1
45	ADVMTMPDGR	10	Unmodified	_ADVMTMPDGR_	TGME49_262620-t26_1-p1	RNA recognition motif-containing protein GN=TGME49_262620	2	546.744	-0.62788	0.013329	47.844	1
46	AEATAQKR	8	Acetyl (Protein N-term),malon(K)	_(ac)AEATAQK(ma)R_	TGME49_239820-t26_1-p1	D-3-phosphoglycerate dehydrogenase GN=TGME49_239820	2	501.746	-0.3122	0.0069768	79.148	1
47	AEATVAGLNK	10	Acetyl (Protein N-term)	_(ac)AEATVAGLNK_	TGME49_310460-t26_1-p1	Rab6 GN=TGME49_310460	2	508.275	-0.99944	0.0037246	40.727	1
48	AEDGSILLSR	10	Unmodified	_AEDGSILLSR_	TGME49_221470-t26_1-p1	hypothetical protein GN=TGME49_221470	2	530.785	1.2814	0.0050677	61.344	1
49	AEDILEK	7	Unmodified	_AEDILEK_	TGME49_309820-t26_1-p1	ribosomal protein RPL11 GN=TGME49_309820	2	409.219	-0.62261	0.006974	85.212	1
50	AEDVELAK	8	Unmodified	_AEDVELAK_	TGME49_218780-t26_1-p1	phosphoserine aminotransferase, putative GN=TGME49_218780	2	437.729	0.7396	0.024658	59.597	1
51	AEFEPLCK	8	Unmodified	_AEFEPLCK_	TGME49_288380-t26_1-p1	heat shock protein HSP90 GN=TGME49_288380	2	497.239	0.36669	0.01985	64.42	1
52	AEFEPLCK	8	Unmodified	_AEFEPLCK_	TGME49_288380-t26_1-p1	heat shock protein HSP90 GN=TGME49_288380	2	497.239	0.0059933	0.024905	59.35	1
53	AEGIEAVKK	9	malon(K)	_AEGIEAVK(ma)K_	TGME49_226830-t26_1-p1	DnaK family protein GN=TGME49_226830	2	515.774		0.0074005	54.259	1
54	AEGIIPGIK	9	Unmodified	_AEGIIPGIK_	TGME49_236040-t26_1-p1	fructose-1,6-bisphosphate aldolase GN=TGME49_236040	2	449.274	-0.16053	0.020378	52.579	1
55	AEGIIPGIKVDK	12	malon(K)	_AEGIIPGIK(ma)VDK_	TGME49_236040-t26_1-p1	fructose-1,6-bisphosphate aldolase GN=TGME49_236040	2	663.369	0.18034	0.011739	57.288	1
56	AEGIIPGIKVDK	12	malon(K)	_AEGIIPGIK(ma)VDK_	TGME49_236040-t26_1-p1	fructose-1,6-bisphosphate aldolase GN=TGME49_236040	2	663.369	0.6463	0.018952	51.03	1
57	AEGQFENIVR	10	Unmodified	_AEGQFENIVR_	TGME49_288380-t26_1-p1	heat shock protein HSP90 GN=TGME49_288380	2	581.796	-0.19827	0.0018786	72.2	1
58	AEGQFENIVR	10	Unmodified	_AEGQFENIVR_	TGME49_288380-t26_1-p1	heat shock protein HSP90 GN=TGME49_288380	2	581.796	-0.52913	0.0035975	64.374	1
59	AEIMEIVQQSK	11	Unmodified	_AEIMEIVQQSK_	TGME49_235470-t26_1-p1	myosin A GN=TGME49_235470	2	638.334	-0.0098286	5.6927e-07	102.4	1
60	AELVNNLGTIAR	12	Unmodified	_AELVNNLGTIAR_	TGME49_288380-t26_1-p1	heat shock protein HSP90 GN=TGME49_288380	2	635.859	-0.56947	0.0050763	46.069	1
61	AELVNNLGTIAR	12	Unmodified	_AELVNNLGTIAR_	TGME49_288380-t26_1-p1	heat shock protein HSP90 GN=TGME49_288380	2	635.859	0.45359	0.0048835	46.88	1
62	AEMKPAAPDEDSEEEEGDLEER	22	Unmodified	_AEMKPAAPDEDSEEEEGDLEER_	TGME49_310750-t26_1-p1	emp24/gp25L/p24 family protein GN=TGME49_310750	3	826.015	0.49393	9.536e-16	70.994	1
63	AESYSSYIFK	10	Unmodified	_AESYSSYIFK_	TGME49_251870-t26_1-p1	histone H2Bb GN=TGME49_251870	2	597.788	0.50006	0.023767	42.802	1
64	AETAGEQEVTGVKK	14	malon(K)	_AETAGEQEVTGVK(ma)K_	TGME49_244880-t26_1-p1	DNA-directed RNA polymerase I RPA1 GN=TGME49_244880	2	766.876	0.096897	0.00017262	61.962	1
65	AETEAAVAEVR	11	Unmodified	_AETEAAVAEVR_	TGME49_212300-t26_1-p1	Putative transmembrane protein(predict) GN=TGME49_212300	2	573.293	0.25504	0.0039646	58.172	1
66	AETEAAVAEVR	11	Unmodified	_AETEAAVAEVR_	TGME49_212300-t26_1-p1	Putative transmembrane protein(predict) GN=TGME49_212300	2	573.293	-1.4927	0.0011678	65.179	1
67	AFAEGGWK	8	Unmodified	_AFAEGGWK_	TGME49_247350-t26_1-p1	thioredoxin domain-containing protein GN=TGME49_247350	2	433.214	1.6598	0.021719	62.546	1
68	AFAEGGWK	8	Unmodified	_AFAEGGWK_	TGME49_247350-t26_1-p1	thioredoxin domain-containing protein GN=TGME49_247350	2	433.214	0.36127	0.013395	71.501	1
69	AFLAGQEVCR	10	Unmodified	_AFLAGQEVCR_	TGME49_257990-t26_1-p1	heat shock protein 101, putative GN=TGME49_257990	2	575.787	0.085281	0.0027816	66.056	1
70	AFLVEEQK	8	Unmodified	_AFLVEEQK_	TGME49_227600-t26_1-p1	ribosomal protein RPL34 GN=TGME49_227600	2	482.261		0.0091205	71.501	1
71	AFMEPLVLEK	10	Unmodified	_AFMEPLVLEK_	TGME49_288630-t26_1-p1	nucleosome assembly protein (NAP), putative GN=TGME49_288630	2	588.82		0.025057	34.692	1
72	AFMEPLVLEK	10	Unmodified	_AFMEPLVLEK_	TGME49_288630-t26_1-p1	nucleosome assembly protein (NAP), putative GN=TGME49_288630	2	588.82	2.0918	0.0063511	58.699	1
73	AFSGLFDR	8	Unmodified	_AFSGLFDR_	TGME49_314100-t26_1-p1	tetratricopeptide repeat-containing protein GN=TGME49_314100	2	456.732	0.99187	0.014829	69.825	1
74	AFSGVEHPVIAGIVPR	16	Unmodified	_AFSGVEHPVIAGIVPR_	TGME49_208370-t26_1-p1	myosin heavy chain, putative GN=TGME49_208370	3	550.311	-0.31192	0.0089639	26.292	1
75	AFVAAAGRPEPELPAR	16	Unmodified	_AFVAAAGRPEPELPAR_	TGME49_310080-t26_1-p1	AMP-binding enzyme domain-containing protein GN=TGME49_310080	3	551.302	-0.09747	0.0064689	42.52	1
77	AGEFTLSLK	9	Unmodified	_AGEFTLSLK_	TGME49_263300-t26_1-p1	eukaryotic porin protein GN=TGME49_263300	2	483.269	0.41	0.0035011	79.148	1
78	AGEFTLSLK	9	Unmodified	_AGEFTLSLK_	TGME49_263300-t26_1-p1	eukaryotic porin protein GN=TGME49_263300	2	483.269	0.26536	0.012572	59.067	1
79	AGGVLGAR	8	Unmodified	_AGGVLGAR_	TGME49_289330-t26_1-p1	ubiquitin carboxyl-terminal hydrolase family 2 protein GN=TGME49_289330	2	350.709	-0.010232	0.023499	60.76	1
80	AGHLAVVEKYLR	12	malon(K)	_AGHLAVVEK(ma)YLR_	TGME49_290950-t26_1-p1	clathrin heavy chain, putative GN=TGME49_290950	3	481.265	-1.709	0.0014669	43.761	1
81	AGLQFPVGR	9	Unmodified	_AGLQFPVGR_	TGME49_261250-t26_1-p1	histone H2A1 GN=TGME49_261250	2	472.769	0.66495	0.0004607	89.698	1
82	AGLQFPVGR	9	Unmodified	_AGLQFPVGR_	TGME49_261250-t26_1-p1	histone H2A1 GN=TGME49_261250	2	472.769	0.28384	0.00079949	99.442	1
83	AGLQFPVGR	9	Unmodified	_AGLQFPVGR_	TGME49_261250-t26_1-p1	histone H2A1 GN=TGME49_261250	2	472.769	0.43512	0.0003291	114.28	1
84	AGLQFPVGR	9	Unmodified	_AGLQFPVGR_	TGME49_261250-t26_1-p1	histone H2A1 GN=TGME49_261250	2	472.769	0.39621	0.0024643	82.426	1
85	AGMVLTFAPVGLTTECK	17	Unmodified	_AGMVLTFAPVGLTTECK_	TGME49_294800-t26_1-p1	elongation factor 1-alpha (EF-1-ALPHA), putative GN=TGME49_294800	2	897.96	0.9456	0.0040357	39.338	1
86	AGVAGDDAPR	10	Unmodified	_AGVAGDDAPR_	TGME49_209030-t26_1-p1	actin ACT1 GN=TGME49_209030	2	464.728	0.11414	0.0039613	63.624	1
87	AGVAGDDAPR	10	Unmodified	_AGVAGDDAPR_	TGME49_209030-t26_1-p1	actin ACT1 GN=TGME49_209030	2	464.728	0.208	0.0089396	54.259	1
88	AHASMVGIEVPVR	13	Unmodified	_AHASMVGIEVPVR_	TGME49_318230-t26_1-p1	phosphoglycerate kinase PGKI GN=TGME49_318230	3	455.915	-0.21234	9.8265e-11	93.623	1
89	AHGYPPQNAFQTLGSHEFK	19	Unmodified	_AHGYPPQNAFQTLGSHEFK_	TGME49_291960-t26_1-p1	rhoptry kinase family protein ROP40 (incomplete catalytic triad) GN=TGME49_291960	3	710.345	0.016885	0.00066884	37.687	1
90	AHIVGLDIFTGK	12	Unmodified	_AHIVGLDIFTGK_	TGME49_251810-t26_1-p1	translation initiation factor eIF-5A, putative GN=TGME49_251810	3	424.243	0.15704	1.5321e-05	74.962	1
91	AHIVGLDIFTGK	12	Unmodified	_AHIVGLDIFTGK_	TGME49_251810-t26_1-p1	translation initiation factor eIF-5A, putative GN=TGME49_251810	2	635.861	0.56202	0.0042724	49.448	1
92	AHIVGLDIFTGK	12	Unmodified	_AHIVGLDIFTGK_	TGME49_251810-t26_1-p1	translation initiation factor eIF-5A, putative GN=TGME49_251810	3	424.243	0.18515	2.5801e-05	68.536	1
93	AHIVGLDIFTGKK	13	malon(K)	_AHIVGLDIFTGK(ma)K_	TGME49_251810-t26_1-p1	translation initiation factor eIF-5A, putative GN=TGME49_251810	3	495.608	0.89108	1.0841e-06	54.898	1
94	AHLYWTK	7	Unmodified	_AHLYWTK_	TGME49_312420-t26_1-p1	Putative transmembrane protein(predict) GN=TGME49_312420	2	459.745	-0.15995	0.0090881	82.671	1
95	AHMQQLFDSK	10	Unmodified	_AHMQQLFDSK_	TGME49_262670-t26_1-p1	ribosomal protein RPL18A GN=TGME49_262670	2	602.793	0.78289	0.0079891	55.649	1
97	AIAPDVEESR	10	Unmodified	_AIAPDVEESR_	TGME49_223920-t26_1-p1	rhoptry neck protein RON3 GN=TGME49_223920	2	543.775	0.34382	0.0089396	54.259	1
98	AIAPDVEESR	10	Unmodified	_AIAPDVEESR_	TGME49_223920-t26_1-p1	rhoptry neck protein RON3 GN=TGME49_223920	2	543.775	1.1104	0.0017933	73.499	1
99	AIEVLLR	7	Unmodified	_AIEVLLR_	TGME49_312480-t26_1-p1	uracil phosphoribosyltransferase FUR1, putative GN=TGME49_312480	2	407.263	0.32346	0.015687	76.847	1
100	AIGYPVLIR	9	Unmodified	_AIGYPVLIR_	TGME49_215260-t26_1-p1	carbamoylphosphate synthetase GN=TGME49_215260	2	501.311	0.1059	0.028228	47.574	1
101	AIGYPVLIR	9	Unmodified	_AIGYPVLIR_	TGME49_215260-t26_1-p1	carbamoylphosphate synthetase GN=TGME49_215260	2	501.311	-0.11231	0.031199	45.68	1
102	AILMDLEPGTMDSVR	15	Unmodified	_AILMDLEPGTMDSVR_	TGME49_266960-t26_1-p1	beta tubulin GN=TGME49_266960	2	824.408	-0.89256	4.555e-05	62.287	1
103	AIPDAFIYFNPR	12	Unmodified	_AIPDAFIYFNPR_	TGME49_227030-t26_1-p1	IMP2_N domain-containing protein(predict) GN=TGME49_227030	2	712.372	-0.21923	0.021979	35.677	1
104	AIPGAGALSGAGAK	14	Unmodified	_AIPGAGALSGAGAK_	TGME49_217460-t26_1-p1	glutaminyl-tRNA synthetase (GlnRS) GN=TGME49_217460	2	570.822	-0.28179	0.032287	31.319	1
105	AIQNALSR	8	Unmodified	_AIQNALSR_	TGME49_280380-t26_1-p1	poly(ADP-ribose) glycohydrolase GN=TGME49_280380	2	436.751	-1.3433	0.018007	66.27	1
106	AIVDMVMEKPDGR	13	Unmodified	_AIVDMVMEKPDGR_	TGME49_317720-t26_1-p1	eukaryotic translation initiation factor 3 subunit 7, putative GN=TGME49_317720	3	487.579	-1.0929	0.001498	57.434	1
107	AIVGLSLEDIKR	12	Unmodified	_AIVGLSLEDIKR_	TGME49_244320-t26_1-p1	ribosomal protein RPL24 GN=TGME49_244320	3	438.598	0.28519	0.0061587	34.768	1
108	AKAQQVLMER	10	malon(K)	_AK(ma)AQQVLMER_	TGME49_236040-t26_1-p1	fructose-1,6-bisphosphate aldolase GN=TGME49_236040	2	630.324	0.41223	0.00016181	96.745	1
109	AKAQQVLMER	10	malon(K)	_AK(ma)AQQVLMER_	TGME49_236040-t26_1-p1	fructose-1,6-bisphosphate aldolase GN=TGME49_236040	2	630.324	0.096068	3.6287e-05	105.65	1
110	AKLTQNAR	8	malon(K)	_AK(ma)LTQNAR_	TGME49_263300-t26_1-p1	eukaryotic porin protein GN=TGME49_263300	2	494.265	-2.6829	0.013209	102.01	1
111	AKSGPEGCGDSAVSLR	16	malon(K)	_AK(ma)SGPEGCGDSAVSLR_	TGME49_246090-t26_1-p1	hypothetical protein GN=TGME49_246090	2	838.881	0.087904	0.012136	43.164	1
112	ALAAEYR	7	Unmodified	_ALAAEYR_	TGME49_263090-t26_1-p1	14-3-3 protein GN=TGME49_263090	2	397.214	0.61891	0.011205	110.63	1
113	ALAAEYR	7	Unmodified	_ALAAEYR_	TGME49_263090-t26_1-p1	14-3-3 protein GN=TGME49_263090	2	397.214	-0.34415	0.0057535	91.906	1
114	ALDNLHAVNK	10	Unmodified	_ALDNLHAVNK_	TGME49_235470-t26_1-p1	myosin A GN=TGME49_235470	3	365.537	0.49163	0.0019911	55.084	1
115	ALDNLHAVNK	10	Unmodified	_ALDNLHAVNK_	TGME49_235470-t26_1-p1	myosin A GN=TGME49_235470	2	547.801	-0.49379	0.0018535	72.582	1
116	ALDNLHAVNK	10	Unmodified	_ALDNLHAVNK_	TGME49_235470-t26_1-p1	myosin A GN=TGME49_235470	3	365.537	-0.58644	0.0029709	49.06	1
117	ALDQLVDEGK	10	Unmodified	_ALDQLVDEGK_	TGME49_209600-t26_1-p1	Cgd5_3650 protein(predict) GN=TGME49_209600	2	544.285	-1.405	0.0050677	61.344	1
118	ALDSLLLKR	9	malon(K)	_ALDSLLLK(ma)R_	TGME49_314890-t26_1-p1	ThiF family protein GN=TGME49_314890	2	557.827	-0.10885	0.024492	46.844	1
119	ALDSLLLKR	9	malon(K)	_ALDSLLLK(ma)R_	TGME49_314890-t26_1-p1	ThiF family protein GN=TGME49_314890	2	557.827	0.27822	0.025136	46.352	1
120	ALDYCHSQGIMHR	13	Unmodified	_ALDYCHSQGIMHR_	TGME49_263070-t26_1-p1	CMGC kinase, CK2 family GN=TGME49_263070	4	397.684	-0.56	0.015955	33.968	1
122	ALEMDPESSK	10	Unmodified	_ALEMDPESSK_	TGME49_283850-t26_1-p1	peptidyl-prolyl cis-trans isomerase GN=TGME49_283850	2	553.755	-0.26054	0.0087843	54.486	1
124	ALGLVGMR	8	Unmodified	_ALGLVGMR_	TGME49_309740-t26_1-p1	LSM domain-containing protein GN=TGME49_309740	2	408.742	-0.25481	0.0040155	84.244	1
125	ALGSGLADLMR	11	Unmodified	_ALGSGLADLMR_	TGME49_310150-t26_1-p1	AMP-binding enzyme domain-containing protein GN=TGME49_310150	2	552.298	-0.40439	0.023796	37.144	1
126	ALLASLSK	8	Unmodified	_ALLASLSK_	TGME49_313390-t26_1-p1	ribosomal protein RPL6 GN=TGME49_313390	2	401.755	-0.30308	0.026391	57.859	1
127	ALLASLSK	8	Unmodified	_ALLASLSK_	TGME49_313390-t26_1-p1	ribosomal protein RPL6 GN=TGME49_313390	2	401.755	-0.46025	0.017586	66.692	1
128	ALLAVSVNPK	10	Unmodified	_ALLAVSVNPK_	TGME49_279390-t26_1-p1	proliferation-associated protein 2G4, putative GN=TGME49_279390	2	506.313	-0.62441	0.0050811	50.108	1
129	ALLAVSVNPK	10	Unmodified	_ALLAVSVNPK_	TGME49_279390-t26_1-p1	proliferation-associated protein 2G4, putative GN=TGME49_279390	2	506.313	-0.41657	2.3548e-05	98.044	1
130	ALLEGFLR	8	Unmodified	_ALLEGFLR_	TGME49_215775-t26_1-p1	rhoptry protein ROP8 GN=TGME49_215775	2	459.774	0.28904	4.5643e-05	121.99	1
131	ALLEGFLR	8	Unmodified	_ALLEGFLR_	TGME49_215775-t26_1-p1	rhoptry protein ROP8 GN=TGME49_215775	2	459.774	-0.16321	0.020703	63.565	1
132	ALLELQKAR	9	malon(K)	_ALLELQK(ma)AR_	TGME49_219540-t26_1-p1	cytosolic tRNA-Ala synthetase GN=TGME49_219540	2	564.325	-0.19551	0.0074805	85.355	1
133	ALLYIPKR	8	malon(K)	_ALLYIPK(ma)R_	TGME49_244560-t26_1-p1	heat shock protein 90, putative GN=TGME49_244560	2	530.313	0.71401	0.022229	57.59	1
134	ALLYIPKR	8	malon(K)	_ALLYIPK(ma)R_	TGME49_244560-t26_1-p1	heat shock protein 90, putative GN=TGME49_244560	2	530.313	0.49791	0.013506	68.224	1
135	ALLYIPKR	8	malon(K)	_ALLYIPK(ma)R_	TGME49_244560-t26_1-p1	heat shock protein 90, putative GN=TGME49_244560	2	530.313	0.77418	0.032441	49.715	1
136	ALMSNADLSR	10	Unmodified	_ALMSNADLSR_	TGME49_309120-t26_1-p1	ribosomal protein RPL4 GN=TGME49_309120	2	539.271	-0.38466	0.00052316	85.533	1
137	ALPGIPAVAPHR	12	Unmodified	_ALPGIPAVAPHR_	TGME49_227600-t26_1-p1	ribosomal protein RPL34 GN=TGME49_227600	3	400.24	-0.46697	0.0011656	46.796	1
138	ALPSNIQIIR	10	Unmodified	_ALPSNIQIIR_	TGME49_262670-t26_1-p1	ribosomal protein RPL18A GN=TGME49_262670	2	562.843	0.54715	0.024034	42.718	1
139	ALQASCLK	8	Unmodified	_ALQASCLK_	TGME49_236040-t26_1-p1	fructose-1,6-bisphosphate aldolase GN=TGME49_236040	2	445.742	-0.93951	0.019027	65.246	1
140	ALQEQLEAR	9	Unmodified	_ALQEQLEAR_	TGME49_289530-t26_1-p1	ribosomal protein RPL19 GN=TGME49_289530	2	529.285	-0.15777	0.00064201	105.52	1
141	ALQEQLEAR	9	Unmodified	_ALQEQLEAR_	TGME49_289530-t26_1-p1	ribosomal protein RPL19 GN=TGME49_289530	2	529.285	-0.46984	0.0056158	72.243	1
142	ALQFLTPK	8	Unmodified	_ALQFLTPK_	TGME49_257090-t26_1-p1	NAC domain-containing protein GN=TGME49_257090	2	459.276	0.67333	0.020309	63.961	1
143	ALVLQDR	7	Unmodified	_ALVLQDR_	TGME49_320050-t26_1-p1	ribosomal protein RPL5 GN=TGME49_320050	2	407.743		3.6335e-05	91.626	1
144	AMCPIVER	8	Unmodified	_AMCPIVER_	TGME49_242330-t26_1-p1	ribosomal protein RPS5 GN=TGME49_242330	2	488.241	0.27124	0.013499	71.379	1
145	AMCPIVER	8	Unmodified	_AMCPIVER_	TGME49_242330-t26_1-p1	ribosomal protein RPS5 GN=TGME49_242330	2	488.241	-0.1468	0.0027592	101.54	1
146	AMDVLVPK	8	Unmodified	_AMDVLVPK_	TGME49_270510-t26_1-p1	asparaginyl-tRNA synthetase (NOB+tRNA synthase) GN=TGME49_270510	2	436.749	-0.1679	0.025273	58.981	1
147	AMLFGPNNDANLFYK	15	Unmodified	_AMLFGPNNDANLFYK_	TGME49_249900-t26_1-p1	adenine nucleotide translocator, putative GN=TGME49_249900	2	857.917	-1.1234	9.4375e-07	68.972	1
148	AMLFGPNNDANLFYK	15	Unmodified	_AMLFGPNNDANLFYK_	TGME49_249900-t26_1-p1	adenine nucleotide translocator, putative GN=TGME49_249900	2	857.917	0.019497	0.013189	34.432	1
149	ANLYDPHVYLFK	12	Unmodified	_ANLYDPHVYLFK_	TGME49_216260-t26_1-p1	eukaryotic initiation factor-2B, gamma subunit, putative GN=TGME49_216260	3	493.926	0.3958	0.023685	23.468	1
150	APEIQIDPNLVQEAER	16	Unmodified	_APEIQIDPNLVQEAER_	TGME49_248340-t26_1-p1	GTP-binding nuclear protein ran/tc4 GN=TGME49_248340	2	911.471	0.21682	8.7835e-05	55.011	1
151	APEKQHLQTVFESQR	15	malon(K)	_APEK(ma)QHLQTVFESQR_	TGME49_205320-t26_1-p1	Putative serine-rich adhesin for platelets family protein(predict) GN=TGME49_205320	3	628.646	0.10184	0.00014345	48.288	1
152	APFDLFETR	9	Unmodified	_APFDLFETR_	TGME49_288380-t26_1-p1	heat shock protein HSP90 GN=TGME49_288380	2	548.277	-0.18907	0.013592	57.532	1
153	APGLGATLGR	10	Unmodified	_APGLGATLGR_	TGME49_294200-t26_1-p1	glucose-6-phosphate 1-dehydrogenase GN=TGME49_294200	2	456.767	0.4029	7.1298e-05	91.658	1
154	APGLGATLGR	10	Unmodified	_APGLGATLGR_	TGME49_294200-t26_1-p1	glucose-6-phosphate 1-dehydrogenase GN=TGME49_294200	2	456.767	1.3856	0.0041088	63.32	1
155	APHESGQSELCSSTR	15	Unmodified	_APHESGQSELCSSTR_	TGME49_283780-t26_1-p1	glucose-6-phosphate isomerase GPI GN=TGME49_283780	3	549.246	0.17264	2.1312e-07	69.431	1
156	APIDWIGCDNPR	12	Unmodified	_APIDWIGCDNPR_	TGME49_262050-t26_1-p1	rhoptry kinase family protein ROP39 GN=TGME49_262050	2	707.333	-0.39587	0.0046854	47.712	1
157	APIDWIGCDNPR	12	Unmodified	_APIDWIGCDNPR_	TGME49_262050-t26_1-p1	rhoptry kinase family protein ROP39 GN=TGME49_262050	2	707.333	-0.60814	0.0044818	48.568	1
158	APILISNVPR	10	Unmodified	_APILISNVPR_	TGME49_313140-t26_1-p1	isocitrate dehydrogenase GN=TGME49_313140	2	540.332	-0.86834	0.0063845	58.63	1
159	APPVPPR	7	Unmodified	_APPVPPR_	TGME49_254720-t26_1-p1	dense granule protein GRA8 GN=TGME49_254720	2	367.221	0.41907	0.019202	75.311	1
160	APPYKPIPESR	11	Unmodified	_APPYKPIPESR_	TGME49_232280-t26_1-p1	IMP2_N domain-containing protein(predict) GN=TGME49_232280	3	418.9	-0.45629	0.015843	46.88	1
161	APSAVFHPSTSAPAICFPKR	20	malon(K)	_APSAVFHPSTSAPAICFPK(ma)R_	TGME49_249390-t26_1-p1	glutamate/leucine/phenylalanine/valine dehydrogenase family protein GN=TGME49_249390	3	743.037	-0.14327	2.5795e-12	69.03	1
162	APSDIYSNYFDK	12	Unmodified	_APSDIYSNYFDK_	TGME49_244560-t26_1-p1	heat shock protein 90, putative GN=TGME49_244560	2	710.325	0.9775	0.000842	64.104	1
163	APTCGATITSSGVAK	15	Unmodified	_APTCGATITSSGVAK_	TGME49_249990-t26_1-p1	Microtubule-binding protein, putative(predict) GN=TGME49_249990	2	710.859	-1.0713	9.0681e-07	69.331	1
164	APTGDPSQNSDGNR	14	Unmodified	_APTGDPSQNSDGNR_	TGME49_315320-t26_1-p1	SAG-related sequence SRS52A GN=TGME49_315320	2	708.311	-0.14313	0.00060833	55.196	1
165	AQATAVYHVCK	11	Unmodified	_AQATAVYHVCK_	TGME49_233110-t26_1-p1	IMP dehydrogenas GN=TGME49_233110	3	416.545	0.41553	0.0025822	43.958	1
166	AQLFSTDEGPVSESASK	17	Unmodified	_AQLFSTDEGPVSESASK_	TGME49_203990-t26_1-p1	rhoptry protein ROP12 GN=TGME49_203990	2	876.918	0.68116	0.0010696	44.391	1
167	AQLFSTDEGPVSESASK	17	Unmodified	_AQLFSTDEGPVSESASK_	TGME49_203990-t26_1-p1	rhoptry protein ROP12 GN=TGME49_203990	2	876.918	-1.6816	0.00023591	48.907	1
168	AQQVLMER	8	Unmodified	_AQQVLMER_	TGME49_236040-t26_1-p1	fructose-1,6-bisphosphate aldolase GN=TGME49_236040	2	487.758	-0.31829	0.0027695	101.43	1
169	AQQVLMER	8	Unmodified	_AQQVLMER_	TGME49_236040-t26_1-p1	fructose-1,6-bisphosphate aldolase GN=TGME49_236040	2	487.758	0.083315	0.0018053	111.17	1
170	AQQVLMER	8	Oxidation (M)	_AQQVLM(ox)ER_	TGME49_236040-t26_1-p1	fructose-1,6-bisphosphate aldolase GN=TGME49_236040	2	495.755	-0.34293	0.014155	42.19	1
171	AQVVAVGLGR	10	Unmodified	_AQVVAVGLGR_	TGME49_273960-t26_1-p1	chaperonin GroS protein GN=TGME49_273960	2	485.296	-3.6017	0.010981	51.276	1
172	ARPIGAGPGR	10	Unmodified	_ARPIGAGPGR_	TGME49_235930-t26_1-p1	domain K- type RNA binding proteins family protein GN=TGME49_235930	2	476.278	-0.35332	0.0054165	81.099	1
173	ASAFLAKR	8	malon(K)	_ASAFLAK(ma)R_	TGME49_203420-t26_1-p1	4'-phosphopantetheinyl transferase domain-containing protein GN=TGME49_203420	2	475.259	0.75652	0.0005828	117.53	1
174	ASAFLAKR	8	malon(K)	_ASAFLAK(ma)R_	TGME49_203420-t26_1-p1	4'-phosphopantetheinyl transferase domain-containing protein GN=TGME49_203420	2	475.259	0.55469	0.0037988	83.358	1
175	ASALISKGNSMDR	13	malon(K)	_ASALISK(ma)GNSMDR_	TGME49_207640-t26_1-p1	isoleucyl-tRNA synthetase family protein GN=TGME49_207640	2	718.346	0.29199	0.0044477	55.755	1
176	ASALISKGNSMDR	13	malon(K)	_ASALISK(ma)GNSMDR_	TGME49_207640-t26_1-p1	isoleucyl-tRNA synthetase family protein GN=TGME49_207640	2	718.346	-0.048077	0.00096993	64.52	1
177	ASEEEFQK	8	Unmodified	_ASEEEFQK_	TGME49_236540-t26_1-p1	RNA recognition motif-containing protein GN=TGME49_236540	2	484.222	0.42051	0.016822	67.494	1
178	ASGMGVDENCVAR	13	Acetyl (Protein N-term),Oxidation (M)	_(ac)ASGM(ox)GVDENCVAR_	TGME49_220400-t26_1-p1	actin depolymerizing factor ADF GN=TGME49_220400	2	712.301	0.70126	0.00015347	52.576	1
179	ASGMGVDENCVAR	13	Acetyl (Protein N-term),Oxidation (M)	_(ac)ASGM(ox)GVDENCVAR_	TGME49_220400-t26_1-p1	actin depolymerizing factor ADF GN=TGME49_220400	2	712.301	-0.50389	8.5609e-07	67.997	1
180	ASGMGVDENCVAR	13	Acetyl (Protein N-term),Oxidation (M)	_(ac)ASGM(ox)GVDENCVAR_	TGME49_220400-t26_1-p1	actin depolymerizing factor ADF GN=TGME49_220400	2	712.301	0.10472	0.00035249	45.28	1
181	ASGMGVDENCVAR	13	Acetyl (Protein N-term)	_(ac)ASGMGVDENCVAR_	TGME49_220400-t26_1-p1	actin depolymerizing factor ADF GN=TGME49_220400	2	704.303	-0.4092	5.7542e-11	92.856	1
182	ASLAWGAASR	10	Unmodified	_ASLAWGAASR_	TGME49_308860-t26_1-p1	hypothetical protein GN=TGME49_308860	2	495.262	0.64643	0.0089215	54.286	1
183	ASPTSASSKAPGTESEACGHR	21	Acetyl (Protein N-term),malon(K)	_(ac)ASPTSASSK(ma)APGTESEACGHR_	TGME49_312600-t26_1-p1	heat shock protein HSP21 GN=TGME49_312600	3	739.322	-0.080216	0.00043545	43.476	1
184	ASQFYTAPTALR	12	Unmodified	_ASQFYTAPTALR_	TGME49_266640-t26_1-p1	Acetyl-coenzyme A synthetase 2, putative GN=TGME49_266640	2	663.346	0.013462	0.016366	39.006	1
185	ASQNFQVER	9	Unmodified	_ASQNFQVER_	TGME49_249390-t26_1-p1	glutamate/leucine/phenylalanine/valine dehydrogenase family protein GN=TGME49_249390	2	539.767	0.47357	0.008809	64.73	1
186	ASSVVNNVAR	10	Unmodified	_ASSVVNNVAR_	TGME49_233460-t26_1-p1	SAG-related sequence SRS29B GN=TGME49_233460	2	508.778	-0.34822	0.01384	47.097	1
187	ASSVVNNVAR	10	Unmodified	_ASSVVNNVAR_	TGME49_233460-t26_1-p1	SAG-related sequence SRS29B GN=TGME49_233460	2	508.778	0.081459	0.0077158	45.908	1
188	ASVESQLPR	9	Unmodified	_ASVESQLPR_	TGME49_203310-t26_1-p1	dense granule protein GRA7 GN=TGME49_203310	2	493.767	0.75621	0.00069752	103.55	1
189	ASVESQLPR	9	Unmodified	_ASVESQLPR_	TGME49_203310-t26_1-p1	dense granule protein GRA7 GN=TGME49_203310	2	493.767	0.52851	0.00073911	102.07	2
190	ATAEFTAK	8	Unmodified	_ATAEFTAK_	TGME49_230160-t26_1-p1	Rna binding(predict) GN=TGME49_230160	2	419.719	-1.074	0.018809	65.465	1
191	ATAEFTAK	8	Unmodified	_ATAEFTAK_	TGME49_230160-t26_1-p1	Rna binding(predict) GN=TGME49_230160	2	419.719	-3.9238	0.017978	66.299	1
192	ATAGDTHLGGEDFDNR	16	Unmodified	_ATAGDTHLGGEDFDNR_	TGME49_273760-t26_1-p1	heat shock protein HSP70 GN=TGME49_273760	2	838.369	-0.016811	2.4515e-08	71.08	1
193	ATAGDTHLGGEDFDNR	16	Unmodified	_ATAGDTHLGGEDFDNR_	TGME49_273760-t26_1-p1	heat shock protein HSP70 GN=TGME49_273760	3	559.248	0.32867	3.9382e-06	56.339	1
194	ATDAFADAASKTFLK	15	malon(K)	_ATDAFADAASK(ma)TFLK_	TGME49_256840-t26_1-p1	Putative transmembrane protein (Fragment)(predict) GN=TGME49_256840	2	821.902	0.57814	0.00028796	60.764	1
195	ATDAFADAASKTFLK	15	malon(K)	_ATDAFADAASK(ma)TFLK_	TGME49_256840-t26_1-p1	Putative transmembrane protein (Fragment)(predict) GN=TGME49_256840	2	821.902	-0.029452	0.001479	54.103	1
196	ATETAEAELPSTHPIR	16	Unmodified	_ATETAEAELPSTHPIR_	TGME49_263090-t26_1-p1	14-3-3 protein GN=TGME49_263090	3	574.96	0.67203	8.6626e-07	63.682	1
197	ATETAEAELPSTHPIR	16	Unmodified	_ATETAEAELPSTHPIR_	TGME49_263090-t26_1-p1	14-3-3 protein GN=TGME49_263090	2	861.936	0.38806	0.00045231	48.216	1
198	ATETAEAELPSTHPIR	16	Unmodified	_ATETAEAELPSTHPIR_	TGME49_263090-t26_1-p1	14-3-3 protein GN=TGME49_263090	3	574.96	0.089718	8.6626e-07	63.682	1
199	ATETAEAELPSTHPIR	16	Unmodified	_ATETAEAELPSTHPIR_	TGME49_263090-t26_1-p1	14-3-3 protein GN=TGME49_263090	3	574.96	1.0483	0.0014683	38.376	1
200	ATMGLDGLSER	11	Unmodified	_ATMGLDGLSER_	TGME49_236040-t26_1-p1	fructose-1,6-bisphosphate aldolase GN=TGME49_236040	2	575.282	-0.6912	0.0063532	50.354	1
202	AVASECSANFVSIK	14	Unmodified	_AVASECSANFVSIK_	TGME49_273090-t26_1-p1	cell division protein CDC48CY GN=TGME49_273090	2	741.866	0.32544	0.020356	33.842	1
203	AVASECSANFVSIK	14	Unmodified	_AVASECSANFVSIK_	TGME49_273090-t26_1-p1	cell division protein CDC48CY GN=TGME49_273090	2	741.866	0.86266	0.00053739	55.66	1
204	AVATSSIAKSAR	12	malon(K)	_AVATSSIAK(ma)SAR_	TGME49_287270-t26_1-p1	Apicoplast PPC1(predict) GN=TGME49_287270	2	624.333	-0.04089	0.0099482	58.885	1
205	AVATSSIAKSAR	12	malon(K)	_AVATSSIAK(ma)SAR_	TGME49_287270-t26_1-p1	Apicoplast PPC1(predict) GN=TGME49_287270	2	624.333	-0.20528	0.012592	56.527	1
206	AVDTVLGANAER	12	Unmodified	_AVDTVLGANAER_	TGME49_293870-t26_1-p1	thioredoxin, putative GN=TGME49_293870	2	608.32	0.54588	3.294e-05	80.69	1
207	AVDTVLGANAER	12	Unmodified	_AVDTVLGANAER_	TGME49_293870-t26_1-p1	thioredoxin, putative GN=TGME49_293870	2	608.32	0.95896	8.6388e-07	90.614	1
208	AVDTVLGANAER	12	Unmodified	_AVDTVLGANAER_	TGME49_293870-t26_1-p1	thioredoxin, putative GN=TGME49_293870	3	405.882	0.15788	1.6249e-05	74.392	1
209	AVEVAQASNK	10	Unmodified	_AVEVAQASNK_	TGME49_260440-t26_1-p1	nuclear factor NF3 GN=TGME49_260440	2	508.772	-0.13402	0.0026934	57.532	1
210	AVEVAQASNKK	11	malon(K)	_AVEVAQASNK(ma)K_	TGME49_260440-t26_1-p1	nuclear factor NF3 GN=TGME49_260440	2	615.82	-0.44509	0.00022816	71.558	1
211	AVEYNNTDVDGR	12	Unmodified	_AVEYNNTDVDGR_	TGME49_291930-t26_1-p1	RNA recognition motif-containing protein GN=TGME49_291930	2	676.807	0.78683	0.00010514	69.03	1
212	AVFPSIVGK	9	Unmodified	_AVFPSIVGK_	TGME49_209030-t26_1-p1	actin ACT1 GN=TGME49_209030	2	459.276	-2.238	0.025336	49.418	1
213	AVGKIIPSLNGK	12	malon(K)	_AVGK(ma)IIPSLNGK_	TGME49_289690-t26_1-p1	glyceraldehyde-3-phosphate dehydrogenase GAPDH1 GN=TGME49_289690	2	641.872	0.69652	0.019211	50.806	1
214	AVGVEVNK	8	Unmodified	_AVGVEVNK_	TGME49_245680-t26_1-p1	ribosomal protein RPL21 GN=TGME49_245680	2	408.235	-0.72431	0.022301	61.962	1
215	AVKQLEAIK	9	malon(K)	_AVK(ma)QLEAIK_	TGME49_270240-t26_1-p1	MAG1 GN=TGME49_270240	2	543.314	0.27023	0.014156	81.017	1
219	AVLLDLVEGK	10	Unmodified	_AVLLDLVEGK_	TGME49_258060-t26_1-p1	myosin heavy chain, putative GN=TGME49_258060	2	528.819	-0.035478	0.0082178	55.314	1
220	AVLSIDPAK	9	Unmodified	_AVLSIDPAK_	TGME49_236040-t26_1-p1	fructose-1,6-bisphosphate aldolase GN=TGME49_236040	2	457.271	-0.14401	0.0014362	85.676	2
221	AVLSIDPAK	9	Unmodified	_AVLSIDPAK_	TGME49_236040-t26_1-p1	fructose-1,6-bisphosphate aldolase GN=TGME49_236040	2	457.271	0.0023694	0.00058405	88.37	1
222	AVLTIPHDNFPEAQK	15	Unmodified	_AVLTIPHDNFPEAQK_	TGME49_308840-t26_1-p1	SAG-related sequence SRS51 GN=TGME49_308840	3	560.63	0.33803	1.9278e-05	58.32	1
223	AVLTIPHDNFPEAQK	15	Unmodified	_AVLTIPHDNFPEAQK_	TGME49_308840-t26_1-p1	SAG-related sequence SRS51 GN=TGME49_308840	3	560.63	0.29366	0.0019517	38.337	1
224	AVSVTGPNGDFVQGEPR	17	Unmodified	_AVSVTGPNGDFVQGEPR_	TGME49_320600-t26_1-p1	cold-shock DNA-binding domain-containing protein GN=TGME49_320600	2	865.429	-0.26008	1.8805e-15	89.358	1
225	AVTLAEVLK	9	Unmodified	_AVTLAEVLK_	TGME49_221380-t26_1-p1	alba 1 GN=TGME49_221380	2	472.295	0.5764	0.018045	54.066	1
226	AVTLAEVLK	9	Unmodified	_AVTLAEVLK_	TGME49_221380-t26_1-p1	alba 1 GN=TGME49_221380	2	472.295	-0.073245	0.01118	61.161	1
227	AVTVFNEK	8	Unmodified	_AVTVFNEK_	TGME49_289690-t26_1-p1	glyceraldehyde-3-phosphate dehydrogenase GAPDH1 GN=TGME49_289690	2	454.248	0.44311	0.0025545	103.74	1
228	AVTVFNEK	8	Unmodified	_AVTVFNEK_	TGME49_289690-t26_1-p1	glyceraldehyde-3-phosphate dehydrogenase GAPDH1 GN=TGME49_289690	2	454.248	0.33045	0.0061877	80.684	1
229	AVVAFNQK	8	Unmodified	_AVVAFNQK_	TGME49_263040-t26_1-p1	ribosomal protein RPS16 GN=TGME49_263040	2	438.751	-0.05501	0.0051984	82.305	1
230	AVVAFNQK	8	Unmodified	_AVVAFNQK_	TGME49_263040-t26_1-p1	ribosomal protein RPS16 GN=TGME49_263040	2	438.751	0.008748	0.0026057	97.602	1
231	AWKGVPENK	9	malon(K)	_AWK(ma)GVPENK_	TGME49_236040-t26_1-p1	fructose-1,6-bisphosphate aldolase GN=TGME49_236040	2	557.78	-0.2262	0.021309	76.302	1
232	AYEVLSDPEK	10	Unmodified	_AYEVLSDPEK_	TGME49_311240-t26_1-p1	DnaJ family chaperone, putative GN=TGME49_311240	2	575.785	0.29798	0.028182	41.399	1
233	AYMDIDIDGEHAGR	14	Oxidation (M)	_AYM(ox)DIDIDGEHAGR_	TGME49_221210-t26_1-p1	cyclophilin GN=TGME49_221210	3	526.9	0.63466	0.0018524	40.477	1
234	AYMDIDIDGEHAGR	14	Unmodified	_AYMDIDIDGEHAGR_	TGME49_221210-t26_1-p1	cyclophilin GN=TGME49_221210	3	521.568	-0.4317	6.112e-07	72.815	1
235	AYMPFLPECYSK	12	Unmodified	_AYMPFLPECYSK_	TGME49_211030-t26_1-p1	hypothetical protein GN=TGME49_211030	2	753.344	-0.69868	0.013888	40.475	1
236	AYNDALIQEQALK	13	Unmodified	_AYNDALIQEQALK_	TGME49_312630-t26_1-p1	anonymous antigen-1, putative GN=TGME49_312630	2	738.888	0.25339	0.0060824	43.761	1
237	CADMNNVGGKGK	12	malon(K)	_CADMNNVGGK(ma)GK_	TGME49_290670-t26_1-p1	leucyl aminopeptidase LAP GN=TGME49_290670	2	668.785	-0.35367	0.020956	49.298	1
238	CDHIVNFVNVKR	12	malon(K)	_CDHIVNFVNVK(ma)R_	TGME49_239820-t26_1-p1	D-3-phosphoglycerate dehydrogenase GN=TGME49_239820	3	529.596	0.26331	0.0024618	54.276	1
239	CGAGCSFR	8	Unmodified	_CGAGCSFR_	TGME49_270510-t26_1-p1	asparaginyl-tRNA synthetase (NOB+tRNA synthase) GN=TGME49_270510	2	457.684	-0.043164	0.016822	67.494	1
240	CGGCGAKVPSTVLR	14	malon(K)	_CGGCGAK(ma)VPSTVLR_	TGME49_280560-t26_1-p1	selenide, water dikinase GN=TGME49_280560	2	774.369	-0.66612	9.3888e-06	74.141	1
241	CPEALFQPSFLGK	13	Unmodified	_CPEALFQPSFLGK_	TGME49_209030-t26_1-p1	actin ACT1 GN=TGME49_209030	2	747.376	-0.35081	5.3317e-16	113.76	1
242	CPEALFQPSFLGK	13	Unmodified	_CPEALFQPSFLGK_	TGME49_209030-t26_1-p1	actin ACT1 GN=TGME49_209030	2	747.376	-0.2603	0.00071514	57.106	1
243	CSAQKGAPIGDGER	14	malon(K)	_CSAQK(ma)GAPIGDGER_	TGME49_243600-t26_1-p1	acetyltransferase, GNAT family protein GN=TGME49_243600	2	766.344	-0.36794	0.0057096	51.495	1
244	CSGEAGEKLCSVIK	14	malon(K)	_CSGEAGEK(ma)LCSVIK_	TGME49_227100-t26_1-p1	Glutaredoxin domain-containing protein(predict) GN=TGME49_227100	2	812.371	-0.45812	0.010201	45.618	1
245	CSGEAGEKLCSVIK	14	malon(K)	_CSGEAGEK(ma)LCSVIK_	TGME49_227100-t26_1-p1	Glutaredoxin domain-containing protein(predict) GN=TGME49_227100	2	812.371	-0.25191	0.0005442	64.454	1
246	CSSLANTAAR	10	Unmodified	_CSSLANTAAR_	TGME49_285870-t26_1-p1	SAG-related sequence SRS20A GN=TGME49_285870	2	525.753	-0.86485	0.014091	46.73	1
247	CTHFTFNDNTR	11	Unmodified	_CTHFTFNDNTR_	TGME49_208030-t26_1-p1	microneme protein MIC4 GN=TGME49_208030	3	471.539	0.3122	0.010414	32.616	1
248	CTHFTFNDNTR	11	Unmodified	_CTHFTFNDNTR_	TGME49_208030-t26_1-p1	microneme protein MIC4 GN=TGME49_208030	3	471.539	0.22074	0.0014485	51.286	1
249	CVAEAGAPAGR	11	Unmodified	_CVAEAGAPAGR_	TGME49_271050-t26_1-p1	SAG-related sequence SRS34A GN=TGME49_271050	2	529.756	-0.10784	0.00012979	80.706	1
250	CYLIGSGFSAHR	12	Unmodified	_CYLIGSGFSAHR_	TGME49_208030-t26_1-p1	microneme protein MIC4 GN=TGME49_208030	3	456.556	-0.33149	0.0010981	47.991	1
251	CYLIGSGFSAHR	12	Unmodified	_CYLIGSGFSAHR_	TGME49_208030-t26_1-p1	microneme protein MIC4 GN=TGME49_208030	3	456.556	-0.69248	0.00068688	55.261	1
252	DAAAAAAEPLIPLTK	15	Unmodified	_DAAAAAAEPLIPLTK_	TGME49_270510-t26_1-p1	asparaginyl-tRNA synthetase (NOB+tRNA synthase) GN=TGME49_270510	2	726.409	1.1471	0.019796	32.702	1
253	DAAAAAAEPLIPLTK	15	Unmodified	_DAAAAAAEPLIPLTK_	TGME49_270510-t26_1-p1	asparaginyl-tRNA synthetase (NOB+tRNA synthase) GN=TGME49_270510	2	726.409	0.77988	9.0338e-05	57.288	1
254	DADVIIVTAGVPR	13	Unmodified	_DADVIIVTAGVPR_	TGME49_318430-t26_1-p1	malate dehydrogenase MDH GN=TGME49_318430	2	663.375	0.51806	0.00056759	59.227	1
255	DAGAIAGLNVIR	12	Unmodified	_DAGAIAGLNVIR_	TGME49_311720-t26_1-p1	chaperonin protein BiP GN=TGME49_311720	2	585.335	0.39564	0.0081187	43.897	1
256	DAGTIAGLSVLR	12	Unmodified	_DAGTIAGLSVLR_	TGME49_273760-t26_1-p1	heat shock protein HSP70 GN=TGME49_273760	2	586.835	-0.57326	0.0028894	55.261	1
257	DAGTIAGLSVLR	12	Unmodified	_DAGTIAGLSVLR_	TGME49_273760-t26_1-p1	heat shock protein HSP70 GN=TGME49_273760	2	586.835	-0.23302	0.00010514	69.03	1
258	DAGTIAGLSVLR	12	Unmodified	_DAGTIAGLSVLR_	TGME49_273760-t26_1-p1	heat shock protein HSP70 GN=TGME49_273760	2	586.835	-1.3098	0.0024395	57.175	1
259	DAGTIAGLSVLR	12	Unmodified	_DAGTIAGLSVLR_	TGME49_273760-t26_1-p1	heat shock protein HSP70 GN=TGME49_273760	2	586.835	-0.5159	0.023188	34.96	1
260	DALFVLLR	8	Unmodified	_DALFVLLR_	TGME49_277270-t26_1-p1	NTPase II GN=TGME49_277270	2	473.79	-0.28033	0.0028293	98.997	1
261	DALFVLLR	8	Unmodified	_DALFVLLR_	TGME49_277270-t26_1-p1	NTPase II GN=TGME49_277270	2	473.79	-0.44554	0.015365	69.198	1
262	DAPEDKPGFLASK	13	Unmodified	_DAPEDKPGFLASK_	TGME49_228290-t26_1-p1	phospholipase/carboxylesterase GN=TGME49_228290	3	458.902	0.44132	0.0044377	50.641	1
263	DASGALQSGAVK	12	Unmodified	_DASGALQSGAVK_	TGME49_214080-t26_1-p1	toxofilin GN=TGME49_214080	2	552.288	0.87788	0.00095566	63.611	1
264	DASGALQSGAVK	12	Unmodified	_DASGALQSGAVK_	TGME49_214080-t26_1-p1	toxofilin GN=TGME49_214080	2	552.288	-0.73291	5.8264e-10	108.56	1
265	DAVEAADFK	9	Unmodified	_DAVEAADFK_	TGME49_290670-t26_1-p1	leucyl aminopeptidase LAP GN=TGME49_290670	2	483.232	-0.5623	0.023869	50.353	1
266	DAVEAADFK	9	Unmodified	_DAVEAADFK_	TGME49_290670-t26_1-p1	leucyl aminopeptidase LAP GN=TGME49_290670	2	483.232	-0.60833	0.012572	59.067	1
267	DAVEAADFKAK	11	malon(K)	_DAVEAADFK(ma)AK_	TGME49_290670-t26_1-p1	leucyl aminopeptidase LAP GN=TGME49_290670	2	625.799	0.40642	0.022398	56.569	1
268	DAVLLIFANK	10	Unmodified	_DAVLLIFANK_	TGME49_276140-t26_1-p1	ADP ribosylation factor ARF1 GN=TGME49_276140	2	552.327	-1.9708	0.0021112	68.657	1
269	DAVLLIFANK	10	Unmodified	_DAVLLIFANK_	TGME49_276140-t26_1-p1	ADP ribosylation factor ARF1 GN=TGME49_276140	2	552.327	-1.337	0.0097166	53.124	1
270	DAVLLIFANK	10	Unmodified	_DAVLLIFANK_	TGME49_276140-t26_1-p1	ADP ribosylation factor ARF1 GN=TGME49_276140	2	552.327	0.31459	0.01497	45.598	1
271	DCALEKGSCR	10	malon(K)	_DCALEK(ma)GSCR_	TGME49_288030-t26_1-p1	Putative transmembrane protein(predict) GN=TGME49_288030	2	641.264	0.15156	0.010633	67.519	1
272	DCTQIEVNPLVETHDGR	17	Unmodified	_DCTQIEVNPLVETHDGR_	TGME49_309752-t26_1-p1	succinate-Coenzyme A ligase, beta subunit, putative GN=TGME49_309752	3	661.646	-0.71254	0.0074736	26.837	1
273	DCWGIFR	7	Unmodified	_DCWGIFR_	TGME49_251690-t26_1-p1	seryl-tRNA synthetase, cytoplasmic, putative GN=TGME49_251690	2	477.219	-0.24957	0.026895	71.949	1
274	DCYVGDEAQSK	11	Unmodified	_DCYVGDEAQSK_	TGME49_209030-t26_1-p1	actin ACT1 GN=TGME49_209030	2	636.264	-0.0041704	0.0003104	69.261	1
275	DCYVGDEAQSK	11	Unmodified	_DCYVGDEAQSK_	TGME49_209030-t26_1-p1	actin ACT1 GN=TGME49_209030	2	636.264	0.26777	0.0026442	61.48	1
276	DCYVGDEAQSKR	12	malon(K)	_DCYVGDEAQSK(ma)R_	TGME49_209030-t26_1-p1	actin ACT1 GN=TGME49_209030	2	757.315	-0.21009	0.0071975	43.592	1
277	DCYVGDEAQSKR	12	malon(K)	_DCYVGDEAQSK(ma)R_	TGME49_209030-t26_1-p1	actin ACT1 GN=TGME49_209030	2	757.315	-0.23705	3.4587e-05	78.505	1
278	DDEEHFSNNPEFDTDR	16	Unmodified	_DDEEHFSNNPEFDTDR_	TGME49_235930-t26_1-p1	domain K- type RNA binding proteins family protein GN=TGME49_235930	3	656.261	0.51866	8.5796e-06	55.975	1
279	DDHEEDTIGEDGNACGK	17	Unmodified	_DDHEEDTIGEDGNACGK_	TGME49_293690-t26_1-p1	profilin PRF GN=TGME49_293690	3	621.243	-0.87698	1.2827e-09	74.783	1
280	DDIGFLTGER	10	Unmodified	_DDIGFLTGER_	TGME49_270250-t26_1-p1	dense granule protein GRA1 GN=TGME49_270250	2	561.775	0.25143	0.0011095	81.017	1
281	DDIGFLTGER	10	Unmodified	_DDIGFLTGER_	TGME49_270250-t26_1-p1	dense granule protein GRA1 GN=TGME49_270250	2	561.775	0.20191	0.0047696	61.958	1
282	DDKDPAFLAK	10	Unmodified	_DDKDPAFLAK_	TGME49_300140-t26_1-p1	elongation factor 1-gamma, putative GN=TGME49_300140	3	373.861	-1.3111	0.0088901	63.32	1
283	DDKDPAFLAK	10	Unmodified	_DDKDPAFLAK_	TGME49_300140-t26_1-p1	elongation factor 1-gamma, putative GN=TGME49_300140	3	373.861	-1.0295	0.0044239	69.672	1
284	DEFNLESK	8	Unmodified	_DEFNLESK_	TGME49_289680-t26_1-p1	Ras-related protein Rab11 GN=TGME49_289680	2	491.23	-0.45031	0.016198	68.224	1
285	DELSVEER	8	Unmodified	_DELSVEER_	TGME49_263090-t26_1-p1	14-3-3 protein GN=TGME49_263090	2	488.733	-0.41186	0.0080663	77.732	1
286	DELSVEER	8	Unmodified	_DELSVEER_	TGME49_263090-t26_1-p1	14-3-3 protein GN=TGME49_263090	2	488.733	-0.047728	0.0088422	76.825	1
287	DFASLLETR	9	Unmodified	_DFASLLETR_	TGME49_206610-t26_1-p1	pyruvate dehydrogenase complex subunit PDH-E2 GN=TGME49_206610	2	526.275	-0.912	0.022421	51.276	1
288	DFASLLETR	9	Unmodified	_DFASLLETR_	TGME49_206610-t26_1-p1	pyruvate dehydrogenase complex subunit PDH-E2 GN=TGME49_206610	2	526.275	1.2957	0.0067073	68.657	1
289	DFATPEER	8	Unmodified	_DFATPEER_	TGME49_219310-t26_1-p1	DnaK family protein GN=TGME49_219310	2	482.722	-0.63324	0.028394	56.258	1
290	DFFGGACKLQK	11	malon(K)	_DFFGGACK(ma)LQK_	TGME49_226960-t26_1-p1	phosphofructokinase PFKII GN=TGME49_226960	2	678.816	0.33479	0.0097347	63.091	1
291	DFFLKPELLR	10	Unmodified	_DFFLKPELLR_	TGME49_216860-t26_1-p1	DEAD (Asp-Glu-Ala-Asp) box polypeptide DDX39 GN=TGME49_216860	3	426.58	-0.25255	0.03032	46.844	1
292	DFGCAPSHSEEVER	14	Unmodified	_DFGCAPSHSEEVER_	TGME49_264660-t26_1-p1	SAG-related sequence SRS44 GN=TGME49_264660	3	540.563	0.85806	0.020623	29.912	1
293	DFGQLFR	7	Unmodified	_DFGQLFR_	TGME49_223920-t26_1-p1	rhoptry neck protein RON3 GN=TGME49_223920	2	441.727		0.028058	71.949	1
294	DFLHDDNSVR	10	Unmodified	_DFLHDDNSVR_	TGME49_280710-t26_1-p1	20S proteasome subunit beta 7, putative GN=TGME49_280710	3	406.523	0.15281	0.0016152	57.785	1
295	DFNTYGAR	8	Unmodified	_DFNTYGAR_	TGME49_226730-t26_1-p1	aconitate hydratase ACN/IRP GN=TGME49_226730	2	472.217	0.80035	0.018203	66.073	1
296	DFTVSSMHGDMDQK	14	Unmodified	_DFTVSSMHGDMDQK_	TGME49_250770-t26_1-p1	eukaryotic initiation factor-4A, putative GN=TGME49_250770	2	799.335	-0.59527	0.0053489	43.03	1
297	DFTVSSMHGDMDQK	14	Unmodified	_DFTVSSMHGDMDQK_	TGME49_250770-t26_1-p1	eukaryotic initiation factor-4A, putative GN=TGME49_250770	3	533.226	-1.3339	0.00032965	50.102	1
298	DFTVSSMHGDMDQK	14	Unmodified	_DFTVSSMHGDMDQK_	TGME49_250770-t26_1-p1	eukaryotic initiation factor-4A, putative GN=TGME49_250770	3	533.226	-0.78447	0.0010183	43.878	1
299	DFTVSSMHGDMDQK	14	Unmodified	_DFTVSSMHGDMDQK_	TGME49_250770-t26_1-p1	eukaryotic initiation factor-4A, putative GN=TGME49_250770	2	799.335	-0.2569	2.6916e-14	105.19	1
300	DFTVSSMHGDMDQKSR	16	malon(K)	_DFTVSSMHGDMDQK(ma)SR_	TGME49_250770-t26_1-p1	eukaryotic initiation factor-4A, putative GN=TGME49_250770	3	642.937	-0.049576	0.0002933	44.238	1
301	DGFVGTGLTCSEDPCSK	17	Unmodified	_DGFVGTGLTCSEDPCSK_	TGME49_319560-t26_1-p1	microneme protein MIC3 GN=TGME49_319560	2	915.388	-0.62386	0.031438	26.837	1
302	DGGIDDAAAIEGK	13	Unmodified	_DGGIDDAAAIEGK_	TGME49_235470-t26_1-p1	myosin A GN=TGME49_235470	2	616.294	0.43265	0.00029224	63.185	1
303	DGPMCVDGNK	10	Unmodified	_DGPMCVDGNK_	TGME49_232250-t26_1-p1	catalase GN=TGME49_232250	2	546.726	0.51431	0.01549	45.433	1
304	DGVVQDATR	9	Unmodified	_DGVVQDATR_	TGME49_318230-t26_1-p1	phosphoglycerate kinase PGKI GN=TGME49_318230	2	480.741	-0.99947	0.018781	53.597	1
305	DHAVVIGQYR	10	Unmodified	_DHAVVIGQYR_	TGME49_311430-t26_1-p1	fibrillarin GN=TGME49_311430	3	386.54	0.15174	0.0031911	47.706	1
306	DHAVVIGQYR	10	Unmodified	_DHAVVIGQYR_	TGME49_311430-t26_1-p1	fibrillarin GN=TGME49_311430	3	386.54	-0.13349	0.0015809	58.083	1
307	DHFQAVITAIGQGK	14	Unmodified	_DHFQAVITAIGQGK_	TGME49_273520-t26_1-p1	PCI domain-containing protein GN=TGME49_273520	3	495.6	0.14742	0.00024254	52.5	1
308	DHFVPVPVR	9	Unmodified	_DHFVPVPVR_	TGME49_231640-t26_1-p1	alveolin domain containing intermediate filament IMC1 GN=TGME49_231640	2	533.296	0.55097	0.012384	59.35	1
309	DHFVPVPVR	9	Unmodified	_DHFVPVPVR_	TGME49_231640-t26_1-p1	alveolin domain containing intermediate filament IMC1 GN=TGME49_231640	2	533.296	-0.07971	0.0017313	84.743	1
310	DHGEEDFVR	9	Unmodified	_DHGEEDFVR_	TGME49_286720-t26_1-p1	heat shock protein HSP28 GN=TGME49_286720	3	368.497	0.24951	0.0027105	60.828	1
311	DHGIHGEEAGLFR	13	Unmodified	_DHGIHGEEAGLFR_	TGME49_258660-t26_1-p1	rhoptry protein ROP6 GN=TGME49_258660	3	479.901	0.32566	0.03107	20.585	1
312	DHHETMYELK	10	Unmodified	_DHHETMYELK_	TGME49_228190-t26_1-p1	eukaryotic initiation factor-3, subunit 5, putative GN=TGME49_228190	3	434.864	-1.4396	0.0016444	57.532	1
313	DHKPITLQQGATLK	14	Unmodified	_DHKPITLQQGATLK_	TGME49_256760-t26_1-p1	pyruvate kinase PyK1 GN=TGME49_256760	3	517.295	0.4981	5.8244e-14	105.19	1
314	DHLFCQYR	8	Unmodified	_DHLFCQYR_	TGME49_239490-t26_1-p1	dehydrogenase E1 component family protein GN=TGME49_239490	3	380.175	-1.5497	0.0032166	71.342	1
315	DHLFCQYR	8	Unmodified	_DHLFCQYR_	TGME49_239490-t26_1-p1	dehydrogenase E1 component family protein GN=TGME49_239490	3	380.175	-0.69411	0.0032166	71.342	1
316	DIDGVPSDK	9	Unmodified	_DIDGVPSDK_	TGME49_214940-t26_1-p1	MIC2-associated protein M2AP GN=TGME49_214940	2	473.23	-0.36245	0.012572	59.067	1
317	DIDGVPSDK	9	Unmodified	_DIDGVPSDK_	TGME49_214940-t26_1-p1	MIC2-associated protein M2AP GN=TGME49_214940	2	473.23	0.035355	0.030646	46.033	1
318	DIDGVPSDK	9	Unmodified	_DIDGVPSDK_	TGME49_214940-t26_1-p1	MIC2-associated protein M2AP GN=TGME49_214940	2	473.23	0.082054	0.002832	81.263	1
319	DIELLLMHNTK	11	Unmodified	_DIELLLMHNTK_	TGME49_267400-t26_1-p1	ribosomal protein RPL32 GN=TGME49_267400	3	442.908	-0.30524	0.029433	22.578	1
320	DIIACGFDPDK	11	Unmodified	_DIIACGFDPDK_	TGME49_288360-t26_1-p1	tryptophanyl-tRNA synthetase (TrpRS2) GN=TGME49_288360	2	625.79	0.79918	0.017472	40.475	1
321	DILVAYDR	8	Unmodified	_DILVAYDR_	TGME49_263040-t26_1-p1	ribosomal protein RPS16 GN=TGME49_263040	2	482.759	0.84413	0.0080663	77.732	1
322	DIQFMDPVAEGR	12	Unmodified	_DIQFMDPVAEGR_	TGME49_228170-t26_1-p1	inner membrane complex protein IMC2A GN=TGME49_228170	2	689.327	0.14439	0.0035282	52.576	1
323	DIYQSCPVIIVVK	13	Unmodified	_DIYQSCPVIIVVK_	TGME49_264660-t26_1-p1	SAG-related sequence SRS44 GN=TGME49_264660	2	767.421	0.08461	0.013455	39.016	1
324	DKDLLPYEIINK	12	Unmodified	_DKDLLPYEIINK_	TGME49_311720-t26_1-p1	chaperonin protein BiP GN=TGME49_311720	3	487.605	0.4466	0.0042543	59.227	1
325	DKDLLPYEIINK	12	Unmodified	_DKDLLPYEIINK_	TGME49_311720-t26_1-p1	chaperonin protein BiP GN=TGME49_311720	2	730.903	0.36647	0.0086361	60.157	1
326	DKDLLPYEIINK	12	Unmodified	_DKDLLPYEIINK_	TGME49_311720-t26_1-p1	chaperonin protein BiP GN=TGME49_311720	3	487.605	0.14092	5.3642e-05	82.774	1
327	DKDLLPYEIINK	12	Unmodified	_DKDLLPYEIINK_	TGME49_311720-t26_1-p1	chaperonin protein BiP GN=TGME49_311720	2	730.903	0.1784	0.021473	49.097	1
328	DKVPGEVIIR	10	Unmodified	_DKVPGEVIIR_	TGME49_295110-t26_1-p1	rhoptry protein ROP7 GN=TGME49_295110	3	375.892	0.19251	0.0017205	83.438	1
329	DKVPGEVIIR	10	Unmodified	_DKVPGEVIIR_	TGME49_295110-t26_1-p1	rhoptry protein ROP7 GN=TGME49_295110	2	563.335	1.4602	0.0051737	51.276	1
330	DLDGIQAELQK	11	Unmodified	_DLDGIQAELQK_	TGME49_288630-t26_1-p1	nucleosome assembly protein (NAP), putative GN=TGME49_288630	2	615.322	0.4645	0.011533	43.604	1
331	DLDGIQAELQK	11	Unmodified	_DLDGIQAELQK_	TGME49_288630-t26_1-p1	nucleosome assembly protein (NAP), putative GN=TGME49_288630	2	615.322	1.0028	0.0063532	50.354	1
332	DLDLVWLCGTEK	12	Unmodified	_DLDLVWLCGTEK_	TGME49_211680-t26_1-p1	protein disulfide isomerase GN=TGME49_211680	2	724.858	0.35706	0.0048835	46.88	1
333	DLDLVWLCGTEK	12	Unmodified	_DLDLVWLCGTEK_	TGME49_211680-t26_1-p1	protein disulfide isomerase GN=TGME49_211680	2	724.858	0.66861	0.0048835	46.88	1
334	DLEEASLGR	9	Unmodified	_DLEEASLGR_	TGME49_304955-t26_1-p1	serine/threonine specific protein phosphatase GN=TGME49_304955	2	495.249	0.52723	0.01118	61.161	1
335	DLLFSTK	7	Unmodified	_DLLFSTK_	TGME49_236040-t26_1-p1	fructose-1,6-bisphosphate aldolase GN=TGME49_236040	2	412.232	0.46303	0.015204	77.058	1
336	DLVVLAVEK	9	Unmodified	_DLVVLAVEK_	TGME49_258150-t26_1-p1	proteasome subunit alpha type 7, putative GN=TGME49_258150	2	493.3	0.27819	0.013592	57.532	1
337	DLYGTAMK	8	Unmodified	_DLYGTAMK_	TGME49_300140-t26_1-p1	elongation factor 1-gamma, putative GN=TGME49_300140	2	449.721	0.32153	0.013499	71.379	1
338	DMWVLSR	7	Unmodified	_DMWVLSR_	TGME49_215775-t26_1-p1	rhoptry protein ROP8 GN=TGME49_215775	2	453.729	0.040117	0.011753	79.469	1
339	DMWVLSR	7	Unmodified	_DMWVLSR_	TGME49_215775-t26_1-p1	rhoptry protein ROP8 GN=TGME49_215775	2	453.729	-0.29267	0.0057535	91.906	1
340	DNEAFYVK	8	Unmodified	_DNEAFYVK_	TGME49_232250-t26_1-p1	catalase GN=TGME49_232250	2	493.235	-0.45922	0.0058138	81.296	1
341	DNEAFYVK	8	Unmodified	_DNEAFYVK_	TGME49_232250-t26_1-p1	catalase GN=TGME49_232250	2	493.235	-0.38649	0.0015586	91.069	1
342	DNIQGITK	8	Unmodified	_DNIQGITK_	TGME49_239260-t26_1-p1	histone H4 GN=TGME49_239260	2	444.743	-0.18147	0.002611	97.635	1
343	DNIQGITKPAIR	12	Unmodified	_DNIQGITKPAIR_	TGME49_239260-t26_1-p1	histone H4 GN=TGME49_239260	3	442.589	-1.8815	9.1285e-05	78.324	1
344	DNIQGITKPAIR	12	Unmodified	_DNIQGITKPAIR_	TGME49_239260-t26_1-p1	histone H4 GN=TGME49_239260	2	663.38	0.91153	0.013137	56.205	1
345	DNIQGITKPAIR	12	Unmodified	_DNIQGITKPAIR_	TGME49_239260-t26_1-p1	histone H4 GN=TGME49_239260	3	442.589		1.7704e-05	60.539	1
346	DNIQGITKPAIR	12	Unmodified	_DNIQGITKPAIR_	TGME49_239260-t26_1-p1	histone H4 GN=TGME49_239260	2	663.38	0.42661	0.024074	46.88	1
347	DNIQGITKPAIR	12	Unmodified	_DNIQGITKPAIR_	TGME49_239260-t26_1-p1	histone H4 GN=TGME49_239260	3	442.589		6.6206e-05	52.463	1
348	DNVHYVYICK	10	Unmodified	_DNVHYVYICK_	TGME49_310070-t26_1-p1	methyltransferase, putative GN=TGME49_310070	3	437.545	-0.024805	0.011427	35.08	1
349	DNVHYVYICK	10	Unmodified	_DNVHYVYICK_	TGME49_310070-t26_1-p1	methyltransferase, putative GN=TGME49_310070	3	437.545	0.19639	0.0019973	55.046	1
350	DNVHYVYICK	10	Unmodified	_DNVHYVYICK_	TGME49_310070-t26_1-p1	methyltransferase, putative GN=TGME49_310070	2	655.814	-0.073316	0.0045231	62.466	1
351	DNVQNTGKGCCFVK	14	malon(K)	_DNVQNTGK(ma)GCCFVK_	TGME49_321500-t26_1-p1	RNA recognition motif-containing protein GN=TGME49_321500	2	856.872	0.12429	0.016041	44.662	1
352	DNVQNTGKGCCFVK	14	malon(K)	_DNVQNTGK(ma)GCCFVK_	TGME49_321500-t26_1-p1	RNA recognition motif-containing protein GN=TGME49_321500	2	856.872	-0.78219	1.4922e-09	91.355	1
353	DPCQDLLAK	9	Unmodified	_DPCQDLLAK_	TGME49_251690-t26_1-p1	seryl-tRNA synthetase, cytoplasmic, putative GN=TGME49_251690	2	530.261	-1.2491	0.010556	50.194	1
354	DPCQDLLAK	9	Unmodified	_DPCQDLLAK_	TGME49_251690-t26_1-p1	seryl-tRNA synthetase, cytoplasmic, putative GN=TGME49_251690	2	530.261	0.080578	0.00055909	108.47	1
355	DPEEIPWADK	10	Unmodified	_DPEEIPWADK_	TGME49_269190-t26_1-p1	glyceraldehyde-3-phosphate dehydrogenase GAPDH2 GN=TGME49_269190	2	600.283	0.46257	0.0060269	59.367	1
357	DPGYQAPIDESLVK	14	Unmodified	_DPGYQAPIDESLVK_	TGME49_221380-t26_1-p1	alba 1 GN=TGME49_221380	2	766.386	-1.4296	4.8773e-06	68.044	1
358	DPKEETTK	8	Unmodified	_DPKEETTK_	TGME49_316340-t26_1-p1	Inner membrane complex protein 22(predict) GN=TGME49_316340	2	474.238	0.051866	0.0078804	91.318	1
359	DPKEETTK	8	Unmodified	_DPKEETTK_	TGME49_316340-t26_1-p1	Inner membrane complex protein 22(predict) GN=TGME49_316340	2	474.238	-0.0069053	0.014104	86.136	1
360	DQVAFLQQYGHA	12	Unmodified	_DQVAFLQQYGHA_	TGME49_292130-t26_1-p1	ribosomal protein RPL13A GN=TGME49_292130	2	688.833	0.14318	0.020894	36.32	1
361	DQYAGDGIAIR	11	Unmodified	_DQYAGDGIAIR_	TGME49_239490-t26_1-p1	dehydrogenase E1 component family protein GN=TGME49_239490	2	589.794	-0.006072	0.0034674	59.418	1
362	DQYGHPHTTLDFSR	14	Unmodified	_DQYGHPHTTLDFSR_	TGME49_258410-t26_1-p1	photosensitized INA-labeled protein PHIL1 GN=TGME49_258410	3	558.594	-0.42336	0.00017344	54.402	1
363	DQYGHPHTTLDFSR	14	Unmodified	_DQYGHPHTTLDFSR_	TGME49_258410-t26_1-p1	photosensitized INA-labeled protein PHIL1 GN=TGME49_258410	4	419.197	0.0075641	0.00093527	49.62	1
364	DRPHPAGVQLLR	12	Unmodified	_DRPHPAGVQLLR_	TGME49_212250-t26_1-p1	XPG N-terminal domain-containing protein GN=TGME49_212250	3	453.593	-0.4674	0.0055896	56.551	1
365	DRPHPAGVQLLR	12	Unmodified	_DRPHPAGVQLLR_	TGME49_212250-t26_1-p1	XPG N-terminal domain-containing protein GN=TGME49_212250	3	453.593	-0.16355	0.010283	47.429	1
366	DSAALTAMLK	10	Unmodified	_DSAALTAMLK_	TGME49_214290-t26_1-p1	DJ-1 family protein GN=TGME49_214290	2	510.773	-0.32583	0.00092771	82.417	1
367	DSAGNIQCR	9	Unmodified	_DSAGNIQCR_	TGME49_235970-t26_1-p1	eukaryotic initiation factor-2 gamma, putative GN=TGME49_235970	2	510.73	0.80087	0.0068393	68.224	1
368	DSATGTGKGCAFVK	14	malon(K)	_DSATGTGK(ma)GCAFVK_	TGME49_268200-t26_1-p1	RNA recognition motif-containing protein GN=TGME49_268200	2	742.838	0.60988	2.07e-05	69.331	1
369	DSATGTGKGCAFVK	14	malon(K)	_DSATGTGK(ma)GCAFVK_	TGME49_268200-t26_1-p1	RNA recognition motif-containing protein GN=TGME49_268200	2	742.838	0.12202	0.00098974	62.055	1
370	DSEGNLDEVATQVK	14	Unmodified	_DSEGNLDEVATQVK_	TGME49_251810-t26_1-p1	translation initiation factor eIF-5A, putative GN=TGME49_251810	2	752.86	-0.57964	2.8291e-30	146.77	1
371	DSEGNLDEVATQVK	14	Unmodified	_DSEGNLDEVATQVK_	TGME49_251810-t26_1-p1	translation initiation factor eIF-5A, putative GN=TGME49_251810	2	752.86	-0.08021	6.2519e-24	139.86	1
372	DSFTNIVR	8	Unmodified	_DSFTNIVR_	TGME49_242070-t26_1-p1	cAMP-dependent protein kinase regulatory subunit GN=TGME49_242070	2	476.248	-0.334	0.0040256	84.227	1
373	DSFTNIVR	8	Unmodified	_DSFTNIVR_	TGME49_242070-t26_1-p1	cAMP-dependent protein kinase regulatory subunit GN=TGME49_242070	2	476.248		1.4241e-05	86.833	1
374	DSLTLEETHR	10	Unmodified	_DSLTLEETHR_	TGME49_288360-t26_1-p1	tryptophanyl-tRNA synthetase (TrpRS2) GN=TGME49_288360	3	400.867	0.53919	0.00038374	76.228	1
375	DSLTLEETHR	10	Unmodified	_DSLTLEETHR_	TGME49_288360-t26_1-p1	tryptophanyl-tRNA synthetase (TrpRS2) GN=TGME49_288360	2	600.796	1.1964	0.0082178	55.314	1
377	DSQTVTCAYGSASNADVHR	19	Unmodified	_DSQTVTCAYGSASNADVHR_	TGME49_308840-t26_1-p1	SAG-related sequence SRS51 GN=TGME49_308840	3	680.301	-0.4503	4.5655e-33	111.77	1
378	DSQTVTCAYGSASNADVHR	19	Unmodified	_DSQTVTCAYGSASNADVHR_	TGME49_308840-t26_1-p1	SAG-related sequence SRS51 GN=TGME49_308840	3	680.301	-0.39875	1.1249e-27	107.72	1
379	DSSSSESTVTPADEAASESEEGDK	24	Unmodified	_DSSSSESTVTPADEAASESEEGDK_	TGME49_310780-t26_1-p1	dense granule protein GRA4 GN=TGME49_310780	3	805.665	0.1659	4.2756e-12	63.906	1
380	DSTLIMQLLR	10	Oxidation (M)	_DSTLIM(ox)QLLR_	TGME49_263090-t26_1-p1	14-3-3 protein GN=TGME49_263090	2	603.332	0.33389	0.0083025	59.908	1
381	DSTLIMQLLR	10	Unmodified	_DSTLIMQLLR_	TGME49_263090-t26_1-p1	14-3-3 protein GN=TGME49_263090	2	595.334	-1.247	0.010003	52.705	1
382	DSTLIMQLLR	10	Unmodified	_DSTLIMQLLR_	TGME49_263090-t26_1-p1	14-3-3 protein GN=TGME49_263090	2	595.334	-1.3591	0.0021112	68.657	1
383	DSVTYTEHAR	10	Unmodified	_DSVTYTEHAR_	TGME49_239260-t26_1-p1	histone H4 GN=TGME49_239260	2	589.775	-0.83355	0.0018786	72.2	1
384	DSVTYTEHAR	10	Unmodified	_DSVTYTEHAR_	TGME49_239260-t26_1-p1	histone H4 GN=TGME49_239260	2	589.775	0.18241	3.8475e-25	156.83	1
385	DSVTYTEHAR	10	Unmodified	_DSVTYTEHAR_	TGME49_239260-t26_1-p1	histone H4 GN=TGME49_239260	3	393.519		0.0019727	57.532	1
386	DSVVPEEWK	9	Unmodified	_DSVVPEEWK_	TGME49_231640-t26_1-p1	alveolin domain containing intermediate filament IMC1 GN=TGME49_231640	2	544.767	0.34813	0.010916	61.56	1
387	DSVVPEEWK	9	Unmodified	_DSVVPEEWK_	TGME49_231640-t26_1-p1	alveolin domain containing intermediate filament IMC1 GN=TGME49_231640	2	544.767	-0.23896	0.0044208	76.17	1
388	DTFDLSK	7	Unmodified	_DTFDLSK_	TGME49_235470-t26_1-p1	myosin A GN=TGME49_235470	2	413.203	0.3669	0.012706	78.324	1
389	DTQILLDMQNR	11	Unmodified	_DTQILLDMQNR_	TGME49_201680-t26_1-p1	eukaryotic initiation factor-3 subunit 10, putative GN=TGME49_201680	2	673.84	-0.49324	0.012978	42.843	1
390	DTVYELR	7	Unmodified	_DTVYELR_	TGME49_239760-t26_1-p1	ribosomal protein RPL22 GN=TGME49_239760	2	448.23	0.34326	0.0077796	84.244	1
391	DVDHLVVAK	9	Unmodified	_DVDHLVVAK_	TGME49_211680-t26_1-p1	protein disulfide isomerase GN=TGME49_211680	2	498.28	0.26099	0.00069752	103.55	1
392	DVDLVMSQVECSR	13	Unmodified	_DVDLVMSQVECSR_	TGME49_205558-t26_1-p1	NAC domain-containing protein GN=TGME49_205558	2	769.353	-0.19213	0.00075252	56.569	1
393	DVDLVMSQVECSR	13	Unmodified	_DVDLVMSQVECSR_	TGME49_205558-t26_1-p1	NAC domain-containing protein GN=TGME49_205558	2	769.353	-0.061991	0.00075252	56.569	1
394	DVEAVCNPIISK	12	Unmodified	_DVEAVCNPIISK_	TGME49_311720-t26_1-p1	chaperonin protein BiP GN=TGME49_311720	2	672.845	0.73986	0.0019663	59.227	1
395	DVEAVCNPIISK	12	Unmodified	_DVEAVCNPIISK_	TGME49_311720-t26_1-p1	chaperonin protein BiP GN=TGME49_311720	2	672.845	0.73735	0.00011223	67.997	1
396	DVGLGFQTPR	10	Unmodified	_DVGLGFQTPR_	TGME49_226970-t26_1-p1	ribosomal protein RPS11 GN=TGME49_226970	2	545.288	-0.59406	0.0018786	72.2	1
397	DVGLGFQTPR	10	Unmodified	_DVGLGFQTPR_	TGME49_226970-t26_1-p1	ribosomal protein RPS11 GN=TGME49_226970	2	545.288	0.6781	0.0045231	62.466	1
398	DVKPHNVMIDHSK	13	Unmodified	_DVKPHNVMIDHSK_	TGME49_263070-t26_1-p1	CMGC kinase, CK2 family GN=TGME49_263070	3	507.261	-0.9859	0.024199	40.477	1
399	DVLLNQLSLHALK	13	Unmodified	_DVLLNQLSLHALK_	TGME49_223270-t26_1-p1	hypothetical protein GN=TGME49_223270	3	488.624	-0.092041	0.020497	23.711	1
400	DVQATVIGTHGDCMVPLVR	19	Unmodified	_DVQATVIGTHGDCMVPLVR_	TGME49_232350-t26_1-p1	lactate dehydrogenase LDH1 GN=TGME49_232350	3	690.015	-0.39241	1.1969e-05	48.907	1
401	DVTEAKGR	8	malon(K)	_DVTEAK(ma)GR_	TGME49_313640-t26_1-p1	Putative transmembrane protein(predict) GN=TGME49_313640	2	481.233	0.42393	0.024278	82.645	1
402	DVTEAKGR	8	malon(K)	_DVTEAK(ma)GR_	TGME49_313640-t26_1-p1	Putative transmembrane protein(predict) GN=TGME49_313640	2	481.233	0.56526	0.0092261	93.178	1
403	DWESRPVDAR	10	Unmodified	_DWESRPVDAR_	TGME49_277270-t26_1-p1	NTPase II GN=TGME49_277270	3	410.867	-0.75419	0.019839	27.481	1
404	DWYLHHYK	8	Unmodified	_DWYLHHYK_	TGME49_283780-t26_1-p1	glucose-6-phosphate isomerase GPI GN=TGME49_283780	3	387.854	1.1469	0.019448	42.835	1
405	DYASSTSVTAVLAK	14	Unmodified	_DYASSTSVTAVLAK_	TGME49_231850-t26_1-p1	serine-threonine phosophatase 2C (PP2C) GN=TGME49_231850	2	706.867	0.81398	0.00026094	60.55	1
406	DYWQTLDR	8	Unmodified	_DYWQTLDR_	TGME49_318160-t26_1-p1	MSP (Major sperm protein) domain-containing protein GN=TGME49_318160	2	548.757	-0.77092	0.026659	57.59	1
407	EAADLAAR	8	Unmodified	_EAADLAAR_	TGME49_313080-t26_1-p1	Putative transmembrane protein(predict) GN=TGME49_313080	2	408.714	-0.48023	0.014829	69.825	1
408	EACSSGVNICIKK	13	malon(K)	_EACSSGVNICIK(ma)K_	TGME49_239620-t26_1-p1	5'-nucleotidase, C-terminal domain-containing protein GN=TGME49_239620	2	776.361	-1.3164	0.00049311	58.885	1
409	EACSSGVNICIKK	13	malon(K)	_EACSSGVNICIK(ma)K_	TGME49_239620-t26_1-p1	5'-nucleotidase, C-terminal domain-containing protein GN=TGME49_239620	2	776.361	-2.0591	0.0013606	52.527	1
410	EAEELVER	8	Unmodified	_EAEELVER_	TGME49_215980-t26_1-p1	Putative transmembrane protein(predict) GN=TGME49_215980	2	487.743	-0.81853	0.0014981	88.37	1
411	EAEGEVDETGVDPK	14	Unmodified	_EAEGEVDETGVDPK_	TGME49_205558-t26_1-p1	NAC domain-containing protein GN=TGME49_205558	2	737.831	-0.30714	3.3745e-14	103.83	1
412	EAFESHR	7	Unmodified	_EAFESHR_	TGME49_232410-t26_1-p1	PDI family protein GN=TGME49_232410	2	438.204	0.27675	0.0079074	95.541	1
413	EALEALTK	8	Unmodified	_EALEALTK_	TGME49_216450-t26_1-p1	peptidase, T1 family protein GN=TGME49_216450	2	437.748	-0.12545	0.0019109	93.267	1
414	EAQFLPICSGLEEGDR	16	Unmodified	_EAQFLPICSGLEEGDR_	TGME49_232410-t26_1-p1	PDI family protein GN=TGME49_232410	2	910.928	0.17772	0.00024009	52.172	1
415	EAQFLPICSGLEEGDR	16	Unmodified	_EAQFLPICSGLEEGDR_	TGME49_232410-t26_1-p1	PDI family protein GN=TGME49_232410	2	910.928	0.40521	0.0088272	34.928	1
416	EASLILNVR	9	Unmodified	_EASLILNVR_	TGME49_264660-t26_1-p1	SAG-related sequence SRS44 GN=TGME49_264660	2	507.801	0.2097	0.032565	45.368	1
417	EASVYNTYTLPK	12	Unmodified	_EASVYNTYTLPK_	TGME49_243570-t26_1-p1	ribosomal protein RPS26 GN=TGME49_243570	2	693.351	-0.57628	0.022119	35.594	1
418	EASVYNTYTLPK	12	Unmodified	_EASVYNTYTLPK_	TGME49_243570-t26_1-p1	ribosomal protein RPS26 GN=TGME49_243570	2	693.351	-0.12646	0.00031425	66.393	1
419	EAVITVPAYFNDSQR	15	Unmodified	_EAVITVPAYFNDSQR_	TGME49_273760-t26_1-p1	heat shock protein HSP70 GN=TGME49_273760	2	855.428	0.12807	8.1109e-07	70.26	1
420	EAVITVPAYFNDSQR	15	Unmodified	_EAVITVPAYFNDSQR_	TGME49_273760-t26_1-p1	heat shock protein HSP70 GN=TGME49_273760	2	855.428	0.4899	0.0030575	43.592	1
423	ECEGEKAEEHK	11	malon(K)	_ECEGEK(ma)AEEHK_	TGME49_321520-t26_1-p1	CS domain-containing protein(predict) GN=TGME49_321520	3	477.861	-0.75808	0.00083289	56.139	1
424	ECEGEKAEEHK	11	malon(K)	_ECEGEK(ma)AEEHK_	TGME49_321520-t26_1-p1	CS domain-containing protein(predict) GN=TGME49_321520	2	716.288	-0.50792	2.412e-06	104.24	1
425	ECLASSILK	9	Unmodified	_ECLASSILK_	TGME49_290670-t26_1-p1	leucyl aminopeptidase LAP GN=TGME49_290670	2	510.773		0.029357	52.579	1
426	ECPSGKNYLR	10	malon(K)	_ECPSGK(ma)NYLR_	TGME49_309210-t26_1-p1	peroxiredoxin 6, putative GN=TGME49_309210	2	655.296	-0.27769	0.032137	58.172	1
427	ECSHYTYNVK	10	Unmodified	_ECSHYTYNVK_	TGME49_208030-t26_1-p1	microneme protein MIC4 GN=TGME49_208030	3	434.192	-0.68322	0.0047858	43.958	1
428	EDDEAGAAGGDGDEETGLR	19	Unmodified	_EDDEAGAAGGDGDEETGLR_	TGME49_294670-t26_1-p1	translation initiation factor 3 subunit GN=TGME49_294670	2	932.377	-0.45828	1.7833e-16	80.316	1
429	EDEVFLR	7	Unmodified	_EDEVFLR_	TGME49_293000-t26_1-p1	3'5'-cyclic nucleotide phosphodiesterase domain-containing protein GN=TGME49_293000	2	454.23	-2.9257	0.015687	76.847	1
430	EDEVFLR	7	Unmodified	_EDEVFLR_	TGME49_293000-t26_1-p1	3'5'-cyclic nucleotide phosphodiesterase domain-containing protein GN=TGME49_293000	2	454.23	-2.2136	0.011766	79.454	1
431	EDEVFLR	7	Unmodified	_EDEVFLR_	TGME49_293000-t26_1-p1	3'5'-cyclic nucleotide phosphodiesterase domain-containing protein GN=TGME49_293000	2	454.23	-0.30672	0.0040424	88.734	1
432	EDQSAANAYR	10	Unmodified	_EDQSAANAYR_	TGME49_321680-t26_1-p1	Hyaluronan/mRNA-binding family protein(predict) GN=TGME49_321680	2	562.752	0.82565	0.011612	50.353	1
433	EDQTEYLEDR	10	Unmodified	_EDQTEYLEDR_	TGME49_288380-t26_1-p1	heat shock protein HSP90 GN=TGME49_288380	2	649.281	0.4283	0.0094132	53.567	1
434	EEAAASEPQVEAEAK	15	Unmodified	_EEAAASEPQVEAEAK_	TGME49_235540-t26_1-p1	eukaryotic initiation factor-2 beta, putative GN=TGME49_235540	2	779.865	0.13869	0.0068282	39.746	1
435	EEAAASEPQVEAEAK	15	Unmodified	_EEAAASEPQVEAEAK_	TGME49_235540-t26_1-p1	eukaryotic initiation factor-2 beta, putative GN=TGME49_235540	2	779.865	-0.14577	3.443e-07	74.789	1
436	EEEDEKVGDEDAKDEEKNEEGEADEPEEK	29	Unmodified	_EEEDEKVGDEDAKDEEKNEEGEADEPEEK_	TGME49_244560-t26_1-p1	heat shock protein 90, putative GN=TGME49_244560	4	838.347	0.18366	2.3661e-55	111.4	1
437	EEEDEKVGDEDAKDEEKNEEGEADEPEEK	29	Unmodified	_EEEDEKVGDEDAKDEEKNEEGEADEPEEK_	TGME49_244560-t26_1-p1	heat shock protein 90, putative GN=TGME49_244560	5	670.879	0.21756	0.030463	14.073	1
438	EEEERLDEVGYDDIGGCR	18	Unmodified	_EEEERLDEVGYDDIGGCR_	TGME49_273090-t26_1-p1	cell division protein CDC48CY GN=TGME49_273090	3	714.308	-0.98191	0.022821	32.858	1
439	EEELIGYCR	9	Unmodified	_EEELIGYCR_	TGME49_308090-t26_1-p1	rhoptry protein ROP5 GN=TGME49_308090	2	584.769	0.26741	0.00079949	99.442	1
440	EELQNVVSAQR	11	Unmodified	_EELQNVVSAQR_	TGME49_238250-t26_1-p1	ribosomal protein RPL36 GN=TGME49_238250	2	636.831		0.0066762	44.847	1
441	EEMINELVQR	10	Unmodified	_EEMINELVQR_	TGME49_314810-t26_1-p1	ribosomal protein RPL7 GN=TGME49_314810	2	630.816	-0.11222	0.00092895	73.885	1
442	EEMINELVQR	10	Unmodified	_EEMINELVQR_	TGME49_314810-t26_1-p1	ribosomal protein RPL7 GN=TGME49_314810	2	630.816	0.80877	0.00054634	85.355	1
443	EEVAGSSNLLK	11	Unmodified	_EEVAGSSNLLK_	TGME49_256760-t26_1-p1	pyruvate kinase PyK1 GN=TGME49_256760	2	573.804	-1.1784	0.0038292	58.511	1
444	EEYDESGPSIVHR	13	Unmodified	_EEYDESGPSIVHR_	TGME49_209030-t26_1-p1	actin ACT1 GN=TGME49_209030	3	506.567	-0.65339	0.00026408	54.871	1
445	EEYDESGPSIVHR	13	Unmodified	_EEYDESGPSIVHR_	TGME49_209030-t26_1-p1	actin ACT1 GN=TGME49_209030	2	759.347	0.28859	3.9675e-08	83.204	1
446	EEYDESGPSIVHR	13	Unmodified	_EEYDESGPSIVHR_	TGME49_209030-t26_1-p1	actin ACT1 GN=TGME49_209030	3	506.567	0.40673	1.2301e-11	98.902	1
447	EEYDESGPSIVHR	13	Unmodified	_EEYDESGPSIVHR_	TGME49_209030-t26_1-p1	actin ACT1 GN=TGME49_209030	2	759.347	-0.048689	1.5848e-06	76.357	1
448	EFADEKDEGVLER	13	Unmodified	_EFADEKDEGVLER_	TGME49_216670-t26_1-p1	FUSE-binding protein 2 / KH-type splicing regulatory protein GN=TGME49_216670	3	512.911	0.42217	0.0003527	65.043	1
449	EFAGAALQAPR	11	Unmodified	_EFAGAALQAPR_	TGME49_225160-t26_1-p1	Putative transmembrane protein(predict) GN=TGME49_225160	2	565.801	-0.39438	0.0070533	47.844	1
450	EFFFDSVR	8	Unmodified	_EFFFDSVR_	TGME49_230380-t26_1-p1	protein translocation complex, SEC61 gamma subunit GN=TGME49_230380	2	523.751	0.24953	0.0098079	75.696	1
451	EFGISASSCK	10	Unmodified	_EFGISASSCK_	TGME49_319560-t26_1-p1	microneme protein MIC3 GN=TGME49_319560	2	543.25	-0.45783	6.0551e-05	93.096	1
452	EFIVGCTQEGK	11	Unmodified	_EFIVGCTQEGK_	TGME49_308840-t26_1-p1	SAG-related sequence SRS51 GN=TGME49_308840	2	634.303	0.13793	6.0937e-07	101.39	1
453	EFIVGCTQEGK	11	Unmodified	_EFIVGCTQEGK_	TGME49_308840-t26_1-p1	SAG-related sequence SRS51 GN=TGME49_308840	2	634.303	0.31557	0.0018489	63.473	1
454	EFLFQFK	7	Unmodified	_EFLFQFK_	TGME49_235470-t26_1-p1	myosin A GN=TGME49_235470	2	479.755	-0.20031	0.021198	74.439	1
455	EFQEEIK	7	Unmodified	_EFQEEIK_	TGME49_277080-t26_1-p1	microneme protein MIC5 GN=TGME49_277080	2	461.729	0.46249	0.012047	79.116	1
456	EFQEEIKEGVEETK	14	Unmodified	_EFQEEIKEGVEETK_	TGME49_277080-t26_1-p1	microneme protein MIC5 GN=TGME49_277080	3	565.609	0.94415	0.0016983	34.444	1
457	EFTGLVDCLGK	11	Unmodified	_EFTGLVDCLGK_	TGME49_249900-t26_1-p1	adenine nucleotide translocator, putative GN=TGME49_249900	2	619.808	0.19848	0.011533	43.604	1
458	EFTSVENFKDEFSK	14	Unmodified	_EFTSVENFKDEFSK_	TGME49_316310-t26_1-p1	superoxide dismutase GN=TGME49_316310	3	569.602	0.64224	0.0022074	52.5	1
459	EFTSVENFKDEFSK	14	Unmodified	_EFTSVENFKDEFSK_	TGME49_316310-t26_1-p1	superoxide dismutase GN=TGME49_316310	3	569.602	1.7715	2.2214e-06	76.01	1
460	EGGLYLR	7	Unmodified	_EGGLYLR_	TGME49_295110-t26_1-p1	rhoptry protein ROP7 GN=TGME49_295110	2	404.222	-0.2701	0.024402	73.039	1
461	EGTASTEPTCR	11	Unmodified	_EGTASTEPTCR_	TGME49_262620-t26_1-p1	RNA recognition motif-containing protein GN=TGME49_262620	2	604.764	-0.11704	0.0026987	61.344	1
462	EGVVGGVR	8	Unmodified	_EGVVGGVR_	TGME49_309590-t26_1-p1	rhoptry protein ROP1 GN=TGME49_309590	2	386.719	0.81445	0.0043152	83.753	1
463	EGVVGGVR	8	Unmodified	_EGVVGGVR_	TGME49_309590-t26_1-p1	rhoptry protein ROP1 GN=TGME49_309590	2	386.719	0.37846	0.0024595	86.794	1
464	EGVVGGVR	8	Unmodified	_EGVVGGVR_	TGME49_309590-t26_1-p1	rhoptry protein ROP1 GN=TGME49_309590	2	386.719	0.38367	0.0024595	86.794	1
465	EHCNSAFQWASK	12	Unmodified	_EHCNSAFQWASK_	TGME49_205470-t26_1-p1	translation elongation factor 2 family protein, putative GN=TGME49_205470	3	488.882	-0.12328	0.00075782	54.007	1
466	EHCNSAFQWASK	12	Unmodified	_EHCNSAFQWASK_	TGME49_205470-t26_1-p1	translation elongation factor 2 family protein, putative GN=TGME49_205470	3	488.882	-0.34885	3.6493e-11	115.92	1
467	EHEGNEKTEPCSEYR	15	malon(K)	_EHEGNEK(ma)TEPCSEYR_	TGME49_289000-t26_1-p1	hypothetical protein GN=TGME49_289000	3	650.931	-0.25777	1.0403e-05	60.764	1
468	EHEGNEKTEPCSEYR	15	malon(K)	_EHEGNEK(ma)TEPCSEYR_	TGME49_289000-t26_1-p1	hypothetical protein GN=TGME49_289000	3	650.931	-0.097393	3.5252e-13	99.392	1
469	EHGAVQINVGQVDEHGR	17	Unmodified	_EHGAVQINVGQVDEHGR_	TGME49_259240-t26_1-p1	ribosomal protein RPS21 GN=TGME49_259240	3	615.638	0.29405	1.109e-06	57.525	1
470	EHGIPLLDVTDSK	13	Unmodified	_EHGIPLLDVTDSK_	TGME49_205340-t26_1-p1	ribosomal protein RPS12 GN=TGME49_205340	3	475.252	0.74033	0.00016459	57.434	1
471	EIAEAYLGK	9	Unmodified	_EIAEAYLGK_	TGME49_273760-t26_1-p1	heat shock protein HSP70 GN=TGME49_273760	2	497.266	0.28924	0.032565	45.368	1
472	EIAQDFK	7	Unmodified	_EIAQDFK_	TGME49_261240-t26_1-p1	histone H3 GN=TGME49_261240	2	425.719	-0.013117	0.017546	76.035	1
473	EIFEESLK	8	Unmodified	_EIFEESLK_	TGME49_242070-t26_1-p1	cAMP-dependent protein kinase regulatory subunit GN=TGME49_242070	2	497.758	-0.41405	0.002743	98.458	1
474	EIGQNIKK	8	malon(K)	_EIGQNIK(ma)K_	TGME49_232350-t26_1-p1	lactate dehydrogenase LDH1 GN=TGME49_232350	2	508.275	0.27765	0.017054	63.816	1
475	EILESLLR	8	Unmodified	_EILESLLR_	TGME49_223270-t26_1-p1	hypothetical protein GN=TGME49_223270	2	486.79	-0.27946	0.011891	73.26	1
476	EILESLLR	8	Unmodified	_EILESLLR_	TGME49_223270-t26_1-p1	hypothetical protein GN=TGME49_223270	2	486.79	-0.42377	0.011891	73.26	1
477	EILGTCNSVGCTVDGK	16	Unmodified	_EILGTCNSVGCTVDGK_	TGME49_254440-t26_1-p1	ribosomal protein RPL12 GN=TGME49_254440	2	855.395	-0.54012	0.00052336	46.892	1
478	EILGTCNSVGCTVDGK	16	Unmodified	_EILGTCNSVGCTVDGK_	TGME49_254440-t26_1-p1	ribosomal protein RPL12 GN=TGME49_254440	2	855.395	-0.12439	1.6923e-12	84.508	1
479	EIQTAVR	7	Unmodified	_EIQTAVR_	TGME49_251870-t26_1-p1	histone H2Bb GN=TGME49_251870	2	408.732	0.27303	0.029268	70.912	1
480	EIVDLSLDR	9	Unmodified	_EIVDLSLDR_	TGME49_316400-t26_1-p1	alpha tubulin TUBA1 GN=TGME49_316400	2	530.288	-0.92504	0.00079676	100.02	1
481	EIVDLSLDR	9	Unmodified	_EIVDLSLDR_	TGME49_316400-t26_1-p1	alpha tubulin TUBA1 GN=TGME49_316400	2	530.288	0.089438	0.00043919	89.08	1
482	EIVHVQGGQCGNQIGAK	17	Unmodified	_EIVHVQGGQCGNQIGAK_	TGME49_266960-t26_1-p1	beta tubulin GN=TGME49_266960	3	598.969	0.31848	0.00036569	43.592	1
483	EIVHVQGGQCGNQIGAK	17	Unmodified	_EIVHVQGGQCGNQIGAK_	TGME49_266960-t26_1-p1	beta tubulin GN=TGME49_266960	3	598.969	0.18874	2.1877e-24	113.65	1
484	EKAALVTWR	9	malon(K)	_EK(ma)AALVTWR_	TGME49_209210-t26_1-p1	KH domain-containing protein(predict) GN=TGME49_209210	2	580.309	0.64118	0.0073637	43.501	1
485	EKAEAAVHASQK	12	malon(K)	_EK(ma)AEAAVHASQK_	TGME49_218000-t26_1-p1	GATA-type domain-containing protein(predict) GN=TGME49_218000	2	677.834	-0.18996	0.00054433	68.044	1
486	EKAEAAVHASQK	12	malon(K)	_EK(ma)AEAAVHASQK_	TGME49_218000-t26_1-p1	GATA-type domain-containing protein(predict) GN=TGME49_218000	2	677.834		2.6817e-07	68.044	1
487	EKAEAAVHASQK	12	malon(K)	_EK(ma)AEAAVHASQK_	TGME49_218000-t26_1-p1	GATA-type domain-containing protein(predict) GN=TGME49_218000	2	677.834	-1.1609	0.00048174	69.92	1
488	EKAEAAVHASQK	12	malon(K)	_EK(ma)AEAAVHASQK_	TGME49_218000-t26_1-p1	GATA-type domain-containing protein(predict) GN=TGME49_218000	2	677.834	-0.040217	4.7155e-06	89.507	1
489	EKAQAHLTNGAK	12	malon(K)	_EK(ma)AQAHLTNGAK_	TGME49_289690-t26_1-p1	glyceraldehyde-3-phosphate dehydrogenase GAPDH1 GN=TGME49_289690	3	451.897	-0.19704	0.00060089	53.034	1
490	EKAQAHLTNGAK	12	malon(K)	_EK(ma)AQAHLTNGAK_	TGME49_289690-t26_1-p1	glyceraldehyde-3-phosphate dehydrogenase GAPDH1 GN=TGME49_289690	2	677.341	-0.14342	5.3671e-09	104.95	1
491	EKDGAGASGAAGR	13	malon(K)	_EK(ma)DGAGASGAAGR_	TGME49_228120-t26_1-p1	Chloroquine resistance marker(predict) GN=TGME49_228120	2	616.779	-0.36337	0.0060471	54.276	1
492	EKHSAPTLYR	10	malon(K)	_EK(ma)HSAPTLYR_	TGME49_227390-t26_1-p1	SET domain-containing protein(predict) GN=TGME49_227390	3	429.882	-0.63164	0.0025772	45.891	1
493	EKTGDRPGPR	10	malon(K)	_EK(ma)TGDRPGPR_	TGME49_227100-t26_1-p1	Glutaredoxin domain-containing protein(predict) GN=TGME49_227100	3	400.199	-0.073434	0.0062753	52.576	1
494	EKTGDRPGPR	10	malon(K)	_EK(ma)TGDRPGPR_	TGME49_227100-t26_1-p1	Glutaredoxin domain-containing protein(predict) GN=TGME49_227100	3	400.199	1.1548	0.0060804	53.034	1
495	ELADVVLYDVVK	12	Unmodified	_ELADVVLYDVVK_	TGME49_232350-t26_1-p1	lactate dehydrogenase LDH1 GN=TGME49_232350	2	681.879	-1.5774	0.0015507	61.03	1
496	ELAEEQQR	8	Unmodified	_ELAEEQQR_	TGME49_269690-t26_1-p1	Putative transmembrane protein(predict) GN=TGME49_269690	2	501.746		0.029655	60.436	1
497	ELAENAR	7	Unmodified	_ELAENAR_	TGME49_236040-t26_1-p1	fructose-1,6-bisphosphate aldolase GN=TGME49_236040	2	401.706	0.4837	0.0022784	119.56	1
498	ELAQQIQK	8	Unmodified	_ELAQQIQK_	TGME49_250770-t26_1-p1	eukaryotic initiation factor-4A, putative GN=TGME49_250770	2	479.272	0.73484	0.0049474	82.716	1
499	ELAQQIQK	8	Unmodified	_ELAQQIQK_	TGME49_250770-t26_1-p1	eukaryotic initiation factor-4A, putative GN=TGME49_250770	2	479.272	0.0045321	0.0012745	89.296	1
500	ELEAIDAR	8	Unmodified	_ELEAIDAR_	TGME49_232440-t26_1-p1	Brf1p family coiled coil protein GN=TGME49_232440	2	458.74	-1.5976	0.016375	68.016	1
501	ELEDGEDIQQK	11	Unmodified	_ELEDGEDIQQK_	TGME49_219540-t26_1-p1	cytosolic tRNA-Ala synthetase GN=TGME49_219540	2	652.304	-0.78104	0.017206	40.616	1
502	ELEDGEDIQQK	11	Unmodified	_ELEDGEDIQQK_	TGME49_219540-t26_1-p1	cytosolic tRNA-Ala synthetase GN=TGME49_219540	2	652.304	-0.24391	0.0076153	45.829	1
503	ELEQEEDEAK	10	Unmodified	_ELEQEEDEAK_	TGME49_244560-t26_1-p1	heat shock protein 90, putative GN=TGME49_244560	2	610.27	0.13013	6.4717e-05	92.538	1
504	ELESEDPDYAVR	12	Unmodified	_ELESEDPDYAVR_	TGME49_232250-t26_1-p1	catalase GN=TGME49_232250	2	711.823	0.50603	1.6707e-08	99.5	1
505	ELESEDPDYAVR	12	Unmodified	_ELESEDPDYAVR_	TGME49_232250-t26_1-p1	catalase GN=TGME49_232250	2	711.823	-0.99309	3.7624e-05	79.492	1
506	ELEVSTSKFDR	11	malon(K)	_ELEVSTSK(ma)FDR_	TGME49_240600-t26_1-p1	chaperonin cpn60, putative GN=TGME49_240600	2	698.833	-0.29978	0.031083	50.222	1
507	ELFTSLPVTFQHK	13	Unmodified	_ELFTSLPVTFQHK_	TGME49_226960-t26_1-p1	phosphofructokinase PFKII GN=TGME49_226960	3	516.28	1.0606	0.0011691	44.511	1
508	ELFTSLPVTFQHK	13	Unmodified	_ELFTSLPVTFQHK_	TGME49_226960-t26_1-p1	phosphofructokinase PFKII GN=TGME49_226960	3	516.28	0.552	0.018189	24.929	1
509	ELGGIVTVLAVGHYVK	16	Unmodified	_ELGGIVTVLAVGHYVK_	TGME49_201780-t26_1-p1	microneme protein MIC2 GN=TGME49_201780	3	552.322	-0.010966	0.0038263	32.702	1
510	ELGISAVHVK	10	Unmodified	_ELGISAVHVK_	TGME49_263700-t26_1-p1	ribosomal protein RPS14 GN=TGME49_263700	2	526.809	0.8748	0.025786	42.161	1
511	ELGISAVHVK	10	Unmodified	_ELGISAVHVK_	TGME49_263700-t26_1-p1	ribosomal protein RPS14 GN=TGME49_263700	3	351.541	-0.13325	0.011771	34.755	1
512	ELISNASDALDK	12	Unmodified	_ELISNASDALDK_	TGME49_288380-t26_1-p1	heat shock protein HSP90 GN=TGME49_288380	2	638.325	0.68728	0.0019663	59.227	1
513	ELISNASDALDK	12	Unmodified	_ELISNASDALDK_	TGME49_288380-t26_1-p1	heat shock protein HSP90 GN=TGME49_288380	2	638.325	0.15758	0.013888	40.475	1
514	ELISNAVDALEK	12	Unmodified	_ELISNAVDALEK_	TGME49_244560-t26_1-p1	heat shock protein 90, putative GN=TGME49_244560	2	651.351	-0.59281	0.0033208	53.448	1
515	ELISNAVDALEK	12	Unmodified	_ELISNAVDALEK_	TGME49_244560-t26_1-p1	heat shock protein 90, putative GN=TGME49_244560	2	651.351	-0.32534	0.0019663	59.227	1
516	ELLVAAENK	9	Unmodified	_ELLVAAENK_	TGME49_238050-t26_1-p1	nuclease and tudor domain-containing protein GN=TGME49_238050	2	493.779	1.9799	0.0070857	67.414	1
517	ELNAVNKEIGQR	12	malon(K)	_ELNAVNK(ma)EIGQR_	TGME49_251690-t26_1-p1	seryl-tRNA synthetase, cytoplasmic, putative GN=TGME49_251690	2	728.873	0.72143	0.00010316	83.692	1
518	ELQALVLGHQER	12	Unmodified	_ELQALVLGHQER_	TGME49_288360-t26_1-p1	tryptophanyl-tRNA synthetase (TrpRS2) GN=TGME49_288360	2	696.883	0.054327	1.8575e-05	84.365	1
519	ELQALVLGHQER	12	Unmodified	_ELQALVLGHQER_	TGME49_288360-t26_1-p1	tryptophanyl-tRNA synthetase (TrpRS2) GN=TGME49_288360	3	464.925	0.41083	0.0020513	43.594	1
520	ELQALVLGHQER	12	Unmodified	_ELQALVLGHQER_	TGME49_288360-t26_1-p1	tryptophanyl-tRNA synthetase (TrpRS2) GN=TGME49_288360	2	696.883	-0.38369	1.4241e-09	102.73	1
521	ELQALVLGHQER	12	Unmodified	_ELQALVLGHQER_	TGME49_288360-t26_1-p1	tryptophanyl-tRNA synthetase (TrpRS2) GN=TGME49_288360	3	464.925	0.57434	0.00083876	52.576	1
522	ELSKQHMQNK	10	Oxidation (M),malon(K)	_ELSK(ma)QHM(ox)QNK_	TGME49_263090-t26_1-p1	14-3-3 protein GN=TGME49_263090	3	448.879	-0.0045754	0.0044703	43.272	1
523	ELSKQHMQNK	10	Oxidation (M),malon(K)	_ELSK(ma)QHM(ox)QNK_	TGME49_263090-t26_1-p1	14-3-3 protein GN=TGME49_263090	2	672.814	-0.35277	0.0013152	59.153	1
524	ELSKQHMQNK	10	malon(K)	_ELSK(ma)QHMQNK_	TGME49_263090-t26_1-p1	14-3-3 protein GN=TGME49_263090	3	443.547	-0.66908	0.0009834	60.255	1
525	ELSKQHMQNK	10	malon(K)	_ELSK(ma)QHMQNK_	TGME49_263090-t26_1-p1	14-3-3 protein GN=TGME49_263090	2	664.817	-0.14775	2.4289e-17	150.46	1
526	ELSTDEVQSLLDK	13	Unmodified	_ELSTDEVQSLLDK_	TGME49_278050-t26_1-p1	proteasome subunit alpha type 1, putative GN=TGME49_278050	2	738.875	-0.30733	0.025941	33.787	1
527	ELTSLAPSTMK	11	Unmodified	_ELTSLAPSTMK_	TGME49_209030-t26_1-p1	actin ACT1 GN=TGME49_209030	2	589.31	-1.7362	0.025176	36.417	1
528	ELTSLAPSTMK	11	Unmodified	_ELTSLAPSTMK_	TGME49_209030-t26_1-p1	actin ACT1 GN=TGME49_209030	2	589.31	0.37388	0.01452	42.031	1
529	ELTSLAPSTMK	11	Unmodified	_ELTSLAPSTMK_	TGME49_209030-t26_1-p1	actin ACT1 GN=TGME49_209030	2	589.31	0.33553	7.3087e-05	84.479	1
530	ELTSLAPSTMK	11	Oxidation (M)	_ELTSLAPSTM(ox)K_	TGME49_209030-t26_1-p1	actin ACT1 GN=TGME49_209030	2	597.308	0.78714	0.020913	42.031	1
531	ELTSVVQK	8	Unmodified	_ELTSVVQK_	TGME49_232300-t26_1-p1	ribosomal protein RPS3 GN=TGME49_232300	2	452.261	0.30952	0.020063	64.207	1
532	ELVSCSNCTDYQAR	14	Unmodified	_ELVSCSNCTDYQAR_	TGME49_251690-t26_1-p1	seryl-tRNA synthetase, cytoplasmic, putative GN=TGME49_251690	2	851.862	-0.48036	0.0013888	50.088	1
533	EMEEQLSAASR	11	Unmodified	_EMEEQLSAASR_	TGME49_295110-t26_1-p1	rhoptry protein ROP7 GN=TGME49_295110	2	625.788	0.24376	0.016918	40.767	1
534	EMEEQLSAASR	11	Unmodified	_EMEEQLSAASR_	TGME49_295110-t26_1-p1	rhoptry protein ROP7 GN=TGME49_295110	2	625.788	0.74906	0.0049844	55.261	1
535	EMEEQLSAASR	11	Oxidation (M)	_EM(ox)EEQLSAASR_	TGME49_295110-t26_1-p1	rhoptry protein ROP7 GN=TGME49_295110	2	633.785	-0.15309	0.010212	47.712	1
536	EMIELPLR	8	Unmodified	_EMIELPLR_	TGME49_273090-t26_1-p1	cell division protein CDC48CY GN=TGME49_273090	2	500.778	-0.86647	0.020703	63.565	1
537	EMIELPLR	8	Unmodified	_EMIELPLR_	TGME49_273090-t26_1-p1	cell division protein CDC48CY GN=TGME49_273090	2	500.778	-0.52709	0.020703	63.565	1
538	EMIVGFLR	8	Unmodified	_EMIVGFLR_	TGME49_258580-t26_1-p1	rhoptry protein ROP17 GN=TGME49_258580	2	482.768	0.073546	0.015365	69.198	1
539	EMIVGFLR	8	Unmodified	_EMIVGFLR_	TGME49_258580-t26_1-p1	rhoptry protein ROP17 GN=TGME49_258580	2	482.768	-0.53877	0.0012745	89.296	1
540	EMLQALPPLR	10	Unmodified	_EMLQALPPLR_	TGME49_294200-t26_1-p1	glucose-6-phosphate 1-dehydrogenase GN=TGME49_294200	2	584.331	0.77483	0.01459	46.001	1
541	EMLQALPPLR	10	Unmodified	_EMLQALPPLR_	TGME49_294200-t26_1-p1	glucose-6-phosphate 1-dehydrogenase GN=TGME49_294200	2	584.331	0.50861	0.018999	44.318	1
542	ENLFQLEQLK	10	Unmodified	_ENLFQLEQLK_	TGME49_251690-t26_1-p1	seryl-tRNA synthetase, cytoplasmic, putative GN=TGME49_251690	2	631.343	-0.53388	0.0018786	72.2	1
543	ENMYLFDVEGK	11	Unmodified	_ENMYLFDVEGK_	TGME49_300260-t26_1-p1	threonyl-tRNA synthetase family protein GN=TGME49_300260	2	672.811	-0.11002	0.015179	41.684	1
544	EPLETEPDEQEEVHFR	16	Unmodified	_EPLETEPDEQEEVHFR_	TGME49_203310-t26_1-p1	dense granule protein GRA7 GN=TGME49_203310	3	661.969	-0.38359	6.5933e-17	98.943	1
545	EPLETEPDEQEEVHFR	16	Unmodified	_EPLETEPDEQEEVHFR_	TGME49_203310-t26_1-p1	dense granule protein GRA7 GN=TGME49_203310	3	661.969	-0.34636	0.00074834	42.314	1
546	EPLETEPDEQEEVHFR	16	Unmodified	_EPLETEPDEQEEVHFR_	TGME49_203310-t26_1-p1	dense granule protein GRA7 GN=TGME49_203310	2	992.45	-0.22261	0.0075444	36.597	1
547	EQATEILR	8	Unmodified	_EQATEILR_	TGME49_266640-t26_1-p1	Acetyl-coenzyme A synthetase 2, putative GN=TGME49_266640	2	480.261	-0.92441	0.020595	63.673	1
548	EQEATNILEK	10	Unmodified	_EQEATNILEK_	TGME49_242290-t26_1-p1	proteasome subunit alpha1, putative GN=TGME49_242290	2	587.801		0.029798	30.889	1
549	EQEEYDDLLEDVK	13	Unmodified	_EQEEYDDLLEDVK_	TGME49_319850-t26_1-p1	splicing factor U2AF family SnRNP auxilary factor large subunit, RRM domain-containing protein GN=TGME49_319850	2	812.865	0.57066	0.0029056	46.797	1
550	EQEPEIWNAIR	11	Unmodified	_EQEPEIWNAIR_	TGME49_289650-t26_1-p1	PEP-carboxykinase I GN=TGME49_289650	2	692.846		0.012062	37.968	1
551	EQEQAVEKPSVEGVK	15	Unmodified	_EQEQAVEKPSVEGVK_	TGME49_299050-t26_1-p1	ribosomal protein RPL17 GN=TGME49_299050	3	552.953	0.83396	0.0019543	47.301	1
552	EQEQAVEKPSVEGVK	15	Unmodified	_EQEQAVEKPSVEGVK_	TGME49_299050-t26_1-p1	ribosomal protein RPL17 GN=TGME49_299050	3	552.953	0.23681	6.4593e-05	64.04	1
553	EQIAAAAAAGSR	12	Unmodified	_EQIAAAAAAGSR_	TGME49_231140-t26_1-p1	ribosomal protein RPS25 GN=TGME49_231140	2	558.294	0.9275	0.0031238	54.276	1
554	EQIAAAAAAGSR	12	Unmodified	_EQIAAAAAAGSR_	TGME49_231140-t26_1-p1	ribosomal protein RPS25 GN=TGME49_231140	2	558.294	0.072826	6.0345e-06	87.573	1
555	EQIAEVEAK	9	Unmodified	_EQIAEVEAK_	TGME49_226730-t26_1-p1	aconitate hydratase ACN/IRP GN=TGME49_226730	2	508.767	1.8936	0.020148	52.725	1
556	EQLILTQQQNELR	13	Unmodified	_EQLILTQQQNELR_	TGME49_216670-t26_1-p1	FUSE-binding protein 2 / KH-type splicing regulatory protein GN=TGME49_216670	2	806.936	-0.44912	0.00092121	55.724	1
557	EQSPGGEAQPDHPTK	15	Unmodified	_EQSPGGEAQPDHPTK_	TGME49_291890-t26_1-p1	microneme protein MIC1 GN=TGME49_291890	3	526.578	0.0088476	0.0096445	27.263	1
558	EQSPGGEAQPDHPTK	15	Unmodified	_EQSPGGEAQPDHPTK_	TGME49_291890-t26_1-p1	microneme protein MIC1 GN=TGME49_291890	3	526.578	-0.66041	5.3282e-05	55.011	1
559	EQSPGGEAQPDHPTK	15	Unmodified	_EQSPGGEAQPDHPTK_	TGME49_291890-t26_1-p1	microneme protein MIC1 GN=TGME49_291890	2	789.363	-0.72621	0.00044289	52.527	1
560	EQVYDIYR	8	Unmodified	_EQVYDIYR_	TGME49_256770-t26_1-p1	eukaryotic translation initiation factor 4A, isoform 3, putative GN=TGME49_256770	2	543.267	0.38041	0.025273	58.981	1
561	ESATAEEEEVAEEE	14	Unmodified	_ESATAEEEEVAEEE_	TGME49_286450-t26_1-p1	dense granule protein GRA5 GN=TGME49_286450	2	776.313	0.82358	2.0394e-23	133.05	1
562	ESATAEEEEVAEEE	14	Unmodified	_ESATAEEEEVAEEE_	TGME49_286450-t26_1-p1	dense granule protein GRA5 GN=TGME49_286450	2	776.313	0.60499	0.00023478	61.235	1
563	ESGVVLVDLPAQTTDK	16	Unmodified	_ESGVVLVDLPAQTTDK_	TGME49_204050-t26_1-p1	subtilisin SUB1 GN=TGME49_204050	2	836.444	0.1591	0.024962	30.072	1
564	ESGYTYVLPKNLLK	14	Unmodified	_ESGYTYVLPKNLLK_	TGME49_231970-t26_1-p1	pre-mRNA processing splicing factor PRP8 GN=TGME49_231970	4	406.979	2.4858	0.016591	19.754	1
565	ESIASLLDK	9	Unmodified	_ESIASLLDK_	TGME49_209950-t26_1-p1	thioredoxin, putative GN=TGME49_209950	2	488.271	1.7404	0.0071101	67.334	1
566	ESLKQQQLQK	10	malon(K)	_ESLK(ma)QQQLQK_	TGME49_251500-t26_1-p1	eukaryotic initiation factor-3, subunit 3, putative GN=TGME49_251500	2	658.346	0.22248	0.012957	66.299	1
567	ESLQQNKILK	10	malon(K)	_ESLQQNK(ma)ILK_	TGME49_288380-t26_1-p1	heat shock protein HSP90 GN=TGME49_288380	2	643.851	0.99849	0.0095402	70.942	1
568	ESLQQNKILK	10	malon(K)	_ESLQQNK(ma)ILK_	TGME49_288380-t26_1-p1	heat shock protein HSP90 GN=TGME49_288380	2	643.851	0.5101	0.0073678	77.744	1
569	ESNVATAVTALR	12	Unmodified	_ESNVATAVTALR_	TGME49_288720-t26_1-p1	ribosomal protein RPL10 GN=TGME49_288720	2	616.336	0.57572	6.4271e-05	74.987	1
570	ESNVATAVTALR	12	Unmodified	_ESNVATAVTALR_	TGME49_288720-t26_1-p1	ribosomal protein RPL10 GN=TGME49_288720	2	616.336	-0.41414	0.0039277	50.897	1
571	ESSATLHVEPAK	12	Unmodified	_ESSATLHVEPAK_	TGME49_206470-t26_1-p1	pyruvate dehydrogenase complex subunit PDH-E3II GN=TGME49_206470	3	423.554	-0.91833	0.017106	31.215	1
572	ETAEQFLGK	9	Unmodified	_ETAEQFLGK_	TGME49_311720-t26_1-p1	chaperonin protein BiP GN=TGME49_311720	2	511.761	0.50602	0.0084804	65.224	1
573	ETAEQFLGK	9	Unmodified	_ETAEQFLGK_	TGME49_311720-t26_1-p1	chaperonin protein BiP GN=TGME49_311720	2	511.761	0.37264	0.0055051	72.607	1
574	ETGASNALSEEHATR	15	Unmodified	_ETGASNALSEEHATR_	TGME49_208370-t26_1-p1	myosin heavy chain, putative GN=TGME49_208370	3	524.913	0.090957	0.0023573	36.597	1
575	ETGCAHLGAQGPKAASPAPAK	21	malon(K)	_ETGCAHLGAQGPK(ma)AASPAPAK_	TGME49_268200-t26_1-p1	RNA recognition motif-containing protein GN=TGME49_268200	3	702.341	-0.64713	1.2154e-18	78.552	1
576	ETVDGAVVR	9	Unmodified	_ETVDGAVVR_	TGME49_264660-t26_1-p1	SAG-related sequence SRS44 GN=TGME49_264660	2	473.254	-0.23661	0.0098149	63.216	1
577	ETVSAPSHMTCLSK	14	Unmodified	_ETVSAPSHMTCLSK_	TGME49_205470-t26_1-p1	translation elongation factor 2 family protein, putative GN=TGME49_205470	3	516.578	-0.7813	0.0023482	39.427	1
578	EVATAIR	7	Unmodified	_EVATAIR_	TGME49_305520-t26_1-p1	ribosomal protein RPS2 GN=TGME49_305520	2	380.222	-0.91429	0.017688	75.972	1
580	EVDACQQQAENLR	13	Unmodified	_EVDACQQQAENLR_	TGME49_313080-t26_1-p1	Putative transmembrane protein(predict) GN=TGME49_313080	2	780.857	0.51525	3.9675e-08	83.204	1
581	EVEFSAER	8	Unmodified	_EVEFSAER_	TGME49_219310-t26_1-p1	DnaK family protein GN=TGME49_219310	2	483.73	0.18212	0.010861	74.464	1
582	EVEMGVVNPNYQ	12	Unmodified	_EVEMGVVNPNYQ_	TGME49_219270-t26_1-p1	multi-pass transmembrane protein GN=TGME49_219270	2	689.819	-0.7092	3.5241e-05	80.102	1
583	EVESVCTPIITK	12	Unmodified	_EVESVCTPIITK_	TGME49_273760-t26_1-p1	heat shock protein HSP70 GN=TGME49_273760	2	688.361	-0.28192	0.0015321	61.11	1
584	EVESVCTPIITK	12	Unmodified	_EVESVCTPIITK_	TGME49_273760-t26_1-p1	heat shock protein HSP70 GN=TGME49_273760	2	688.361	0.019419	0.0035282	52.576	1
585	EVEVPQGR	8	Unmodified	_EVEVPQGR_	TGME49_239100-t26_1-p1	ribosomal protein RPS7 GN=TGME49_239100	2	457.241	0.97265	0.0079035	77.923	1
586	EVEVPQGR	8	Unmodified	_EVEVPQGR_	TGME49_239100-t26_1-p1	ribosomal protein RPS7 GN=TGME49_239100	2	457.241	-0.25567	0.0016925	111.82	1
587	EVFEELCSK	9	Unmodified	_EVFEELCSK_	TGME49_219310-t26_1-p1	DnaK family protein GN=TGME49_219310	2	570.766	0.041201	0.012817	58.699	1
588	EVLHEEYESR	10	Unmodified	_EVLHEEYESR_	TGME49_300100-t26_1-p1	rhoptry neck protein RON2 GN=TGME49_300100	2	645.802	-0.49467	0.021619	39.625	1
589	EVMMIVMQR	9	Unmodified	_EVMMIVMQR_	TGME49_207440-t26_1-p1	ribosomal protein RPS4 GN=TGME49_207440	2	568.785	-0.1963	0.0068393	68.224	1
590	EVNVIQAVR	9	Unmodified	_EVNVIQAVR_	TGME49_248700-t26_1-p1	alveolin domain containing intermediate filament IMC12 GN=TGME49_248700	2	514.298	0.75258	0.013554	57.59	1
591	EVPVPVHVQR	10	Unmodified	_EVPVPVHVQR_	TGME49_231630-t26_1-p1	alveolin domain containing intermediate filament IMC4 GN=TGME49_231630	3	387.224	0.2016	0.0013138	60.398	1
592	EVPVPVHVQR	10	Unmodified	_EVPVPVHVQR_	TGME49_231630-t26_1-p1	alveolin domain containing intermediate filament IMC4 GN=TGME49_231630	3	387.224	-0.18604	0.00044464	72.325	1
593	EVVVEYEQLNK	11	Unmodified	_EVVVEYEQLNK_	TGME49_288380-t26_1-p1	heat shock protein HSP90 GN=TGME49_288380	2	675.351	0.71891	0.0002835	70.942	1
594	EVVVEYEQLNK	11	Unmodified	_EVVVEYEQLNK_	TGME49_288380-t26_1-p1	heat shock protein HSP90 GN=TGME49_288380	2	675.351	0.27048	1.8695e-06	97.734	1
595	EWVTGDSVLTGLK	13	Unmodified	_EWVTGDSVLTGLK_	TGME49_233480-t26_1-p1	SAG-related sequence SRS29C GN=TGME49_233480	2	702.872	0.25089	0.0021741	50.088	1
596	EWVTGDSVLTGLK	13	Unmodified	_EWVTGDSVLTGLK_	TGME49_233480-t26_1-p1	SAG-related sequence SRS29C GN=TGME49_233480	2	702.872	-0.18502	0.0049178	44.511	1
598	EYEVPTYGYGSR	12	Unmodified	_EYEVPTYGYGSR_	TGME49_232410-t26_1-p1	PDI family protein GN=TGME49_232410	2	710.823	0.28792	9.0421e-05	71.176	1
599	EYEVPTYGYGSR	12	Unmodified	_EYEVPTYGYGSR_	TGME49_232410-t26_1-p1	PDI family protein GN=TGME49_232410	2	710.823	-0.57371	7.492e-05	73.435	1
600	EYFTQDGR	8	Unmodified	_EYFTQDGR_	TGME49_321500-t26_1-p1	RNA recognition motif-containing protein GN=TGME49_321500	2	508.228	0.21997	0.020849	63.419	1
601	EYHLTVSSGR	10	Unmodified	_EYHLTVSSGR_	TGME49_244110-t26_1-p1	nucleosome assembly protein (nap) protein GN=TGME49_244110	3	383.528	0.065652	0.0025134	51.872	1
602	EYHLTVSSGR	10	Unmodified	_EYHLTVSSGR_	TGME49_244110-t26_1-p1	nucleosome assembly protein (nap) protein GN=TGME49_244110	3	383.528	-0.4013	0.00024047	81.771	1
603	EYHLTVSSGR	10	Unmodified	_EYHLTVSSGR_	TGME49_244110-t26_1-p1	nucleosome assembly protein (nap) protein GN=TGME49_244110	2	574.788	-0.017134	0.028182	41.399	1
604	EYQYSEFR	8	Unmodified	_EYQYSEFR_	TGME49_224460-t26_1-p1	aminopeptidase n, putative GN=TGME49_224460	2	561.249	-0.32924	0.025656	58.596	1
605	FAAEIAHNISSR	12	Unmodified	_FAAEIAHNISSR_	TGME49_267400-t26_1-p1	ribosomal protein RPL32 GN=TGME49_267400	3	439.23	-0.15646	0.0071008	35.487	1
606	FADENFSYK	9	Unmodified	_FADENFSYK_	TGME49_205700-t26_1-p1	cyclophilin precursor GN=TGME49_205700	2	560.751	-0.29927	1.0753e-05	121.73	1
607	FADENFSYK	9	Unmodified	_FADENFSYK_	TGME49_205700-t26_1-p1	cyclophilin precursor GN=TGME49_205700	2	560.751	-0.33889	0.00059464	107.21	1
608	FADENFSYK	9	Unmodified	_FADENFSYK_	TGME49_205700-t26_1-p1	cyclophilin precursor GN=TGME49_205700	2	560.751	-0.23072	0.022421	51.276	1
609	FADQVLR	7	Unmodified	_FADQVLR_	TGME49_247470-t26_1-p1	nucleolar protein, putative GN=TGME49_247470	2	424.735	-1.8198	0.012022	79.146	1
610	FAESKAAR	8	malon(K)	_FAESK(ma)AAR_	TGME49_321500-t26_1-p1	RNA recognition motif-containing protein GN=TGME49_321500	2	483.238	-0.34575	0.029887	80.755	1
611	FANSYSEVQLR	11	Unmodified	_FANSYSEVQLR_	TGME49_273460-t26_1-p1	eukaryotic translation initiation factor 3 subunit 6 interacting protein GN=TGME49_273460	2	657.328	-1.8738	0.022181	37.995	1
612	FAPEFEK	7	Unmodified	_FAPEFEK_	TGME49_249270-t26_1-p1	protein disulfide isomerase-related protein (provisional), putative GN=TGME49_249270	2	434.216	-0.30756	0.011753	79.469	1
613	FASDQFHVR	9	Unmodified	_FASDQFHVR_	TGME49_232410-t26_1-p1	PDI family protein GN=TGME49_232410	2	553.773		4.5435e-07	86.67	1
614	FCLYTASAFK	10	Unmodified	_FCLYTASAFK_	TGME49_309120-t26_1-p1	ribosomal protein RPL4 GN=TGME49_309120	2	604.294	0.039138	0.024034	42.718	1
615	FCVPNYPNIR	10	Unmodified	_FCVPNYPNIR_	TGME49_206470-t26_1-p1	pyruvate dehydrogenase complex subunit PDH-E3II GN=TGME49_206470	2	640.316	-0.1453	0.0074534	56.432	1
616	FCYVCPR	7	Unmodified	_FCYVCPR_	TGME49_264660-t26_1-p1	SAG-related sequence SRS44 GN=TGME49_264660	2	501.22	-0.46484	0.010692	103.28	1
617	FDASAMK	7	Unmodified	_FDASAMK_	TGME49_263300-t26_1-p1	eukaryotic porin protein GN=TGME49_263300	2	385.181	0.8617	0.031359	69.998	1
618	FDDENFDLK	9	Unmodified	_FDDENFDLK_	TGME49_221210-t26_1-p1	cyclophilin GN=TGME49_221210	2	571.754	0.41394	0.0020079	83.869	1
619	FDDPSVQSDMK	11	Unmodified	_FDDPSVQSDMK_	TGME49_273760-t26_1-p1	heat shock protein HSP70 GN=TGME49_273760	2	634.777		1.9699e-07	74.611	1
620	FDGGDLNAHTIR	12	Unmodified	_FDGGDLNAHTIR_	TGME49_305850-t26_1-p1	RNA recognition motif-containing protein GN=TGME49_305850	3	439.218	0.45318	0.0064238	34.264	1
621	FDIQVDK	7	Unmodified	_FDIQVDK_	TGME49_234450-t26_1-p1	ribosomal protein RPS15A GN=TGME49_234450	2	432.727	0.080603	0.0052173	87.323	1
622	FDNNANTQICEDK	13	Unmodified	_FDNNANTQICEDK_	TGME49_318230-t26_1-p1	phosphoglycerate kinase PGKI GN=TGME49_318230	2	784.836	0.08079	9.8873e-14	99.941	1
623	FDNNANTQICEDK	13	Unmodified	_FDNNANTQICEDK_	TGME49_318230-t26_1-p1	phosphoglycerate kinase PGKI GN=TGME49_318230	2	784.836	-0.2657	1.2145e-18	122.78	1
624	FDNVYGCR	8	Unmodified	_FDNVYGCR_	TGME49_225050-t26_1-p1	adenosylhomocysteinase, putative GN=TGME49_225050	2	515.724	0.25493	0.0023107	106.36	1
625	FDQEGADNLR	10	Unmodified	_FDQEGADNLR_	TGME49_223920-t26_1-p1	rhoptry neck protein RON3 GN=TGME49_223920	2	582.768	-0.12831	0.0039613	63.624	1
626	FDQEGADNLR	10	Unmodified	_FDQEGADNLR_	TGME49_223920-t26_1-p1	rhoptry neck protein RON3 GN=TGME49_223920	2	582.768	0.30451	0.0020414	69.721	1
627	FDSIGVENTEANR	13	Unmodified	_FDSIGVENTEANR_	TGME49_236040-t26_1-p1	fructose-1,6-bisphosphate aldolase GN=TGME49_236040	2	726.342	0.45292	9.6249e-14	100.22	1
628	FDVELLDSHPKPK	13	Unmodified	_FDVELLDSHPKPK_	TGME49_283850-t26_1-p1	peptidyl-prolyl cis-trans isomerase GN=TGME49_283850	4	381.957	0.53247	0.00036819	46.88	1
629	FEAGNMAMVTGGHNVGR	17	Unmodified	_FEAGNMAMVTGGHNVGR_	TGME49_207440-t26_1-p1	ribosomal protein RPS4 GN=TGME49_207440	3	583.272	0.25586	0.03268	18.234	1
630	FEDRPDYAYLR	11	Unmodified	_FEDRPDYAYLR_	TGME49_240640-t26_1-p1	casein kinase I GN=TGME49_240640	3	482.233	0.47279	0.02224	25.014	1
631	FEELNSDLFQK	11	Unmodified	_FEELNSDLFQK_	TGME49_311720-t26_1-p1	chaperonin protein BiP GN=TGME49_311720	2	685.335	-0.63432	5.8485e-06	91.313	1
632	FEELNSDLFQK	11	Unmodified	_FEELNSDLFQK_	TGME49_311720-t26_1-p1	chaperonin protein BiP GN=TGME49_311720	2	685.335	0.067094	7.3087e-05	84.479	1
633	FEILGMTDAAK	11	Unmodified	_FEILGMTDAAK_	TGME49_270510-t26_1-p1	asparaginyl-tRNA synthetase (NOB+tRNA synthase) GN=TGME49_270510	2	598.305	0.20322	0.0047212	56.205	1
634	FEKESSEMGK	10	malon(K)	_FEK(ma)ESSEMGK_	TGME49_294800-t26_1-p1	elongation factor 1-alpha (EF-1-ALPHA), putative GN=TGME49_294800	2	629.269	0.24697	0.0082161	75.088	1
635	FESGDEGTSTMSPSVAAR	18	Unmodified	_FESGDEGTSTMSPSVAAR_	TGME49_214080-t26_1-p1	toxofilin GN=TGME49_214080	2	914.905	0.53704	0.0036813	37.157	1
637	FFASASSEVR	10	Unmodified	_FFASASSEVR_	TGME49_255190-t26_1-p1	myosin C GN=TGME49_255190	2	550.772	0.39232	0.0081915	55.353	1
638	FGCSSITPELISR	13	Unmodified	_FGCSSITPELISR_	TGME49_288360-t26_1-p1	tryptophanyl-tRNA synthetase (TrpRS2) GN=TGME49_288360	2	733.869	-0.53987	0.017686	36.292	1
639	FGFEFLR	7	Unmodified	_FGFEFLR_	TGME49_212300-t26_1-p1	Putative transmembrane protein(predict) GN=TGME49_212300	2	458.24	0.20047	0.006851	85.359	1
640	FGGSSDPCAFIR	12	Unmodified	_FGGSSDPCAFIR_	TGME49_290040-t26_1-p1	macrophage migration inhibitory factor, putative GN=TGME49_290040	2	657.301	0.25546	0.0042724	49.448	1
641	FGGSSDPCAFIR	12	Unmodified	_FGGSSDPCAFIR_	TGME49_290040-t26_1-p1	macrophage migration inhibitory factor, putative GN=TGME49_290040	2	657.301	0.53038	0.0026649	56.205	1
642	FGQASQQLGGK	11	Unmodified	_FGQASQQLGGK_	TGME49_257090-t26_1-p1	NAC domain-containing protein GN=TGME49_257090	2	560.791	-2.4338	6.7789e-10	128.81	1
643	FGVYDCGNK	9	Unmodified	_FGVYDCGNK_	TGME49_220400-t26_1-p1	actin depolymerizing factor ADF GN=TGME49_220400	2	530.232	-0.2358	0.0088597	64.654	1
644	FGVYDCGNK	9	Unmodified	_FGVYDCGNK_	TGME49_220400-t26_1-p1	actin depolymerizing factor ADF GN=TGME49_220400	2	530.232	-0.4331	0.0066498	68.846	1
645	FHIEEEGKGVDEQGNK	16	malon(K)	_FHIEEEGK(ma)GVDEQGNK_	TGME49_318230-t26_1-p1	phosphoglycerate kinase PGKI GN=TGME49_318230	3	634.622	0.64535	5.9796e-05	50.305	1
646	FHIEEEGKGVDEQGNK	16	malon(K)	_FHIEEEGK(ma)GVDEQGNK_	TGME49_318230-t26_1-p1	phosphoglycerate kinase PGKI GN=TGME49_318230	3	634.622	0.90033	0.00020039	44.925	1
647	FHILPLSEYK	10	Unmodified	_FHILPLSEYK_	TGME49_235470-t26_1-p1	myosin A GN=TGME49_235470	3	416.233	-0.1473	0.0037309	45.368	1
648	FHILPLSEYK	10	Unmodified	_FHILPLSEYK_	TGME49_235470-t26_1-p1	myosin A GN=TGME49_235470	3	416.233	0.35214	0.024666	28.204	1
649	FHILPLSEYK	10	Unmodified	_FHILPLSEYK_	TGME49_235470-t26_1-p1	myosin A GN=TGME49_235470	2	623.845	0.78443	0.013028	48.284	1
650	FHILPLSEYK	10	Unmodified	_FHILPLSEYK_	TGME49_235470-t26_1-p1	myosin A GN=TGME49_235470	3	416.233	0.21751	0.0072049	40.724	1
651	FHPSVTLSVMK	11	Unmodified	_FHPSVTLSVMK_	TGME49_293180-t26_1-p1	NADP-specific glutamate dehydrogenase GN=TGME49_293180	3	415.894	0.23067	0.0017462	46.796	1
652	FIEVYPATR	9	Unmodified	_FIEVYPATR_	TGME49_236540-t26_1-p1	RNA recognition motif-containing protein GN=TGME49_236540	2	548.295	1.6312	0.0084804	65.224	1
653	FIIGEGQVIR	10	Unmodified	_FIIGEGQVIR_	TGME49_283850-t26_1-p1	peptidyl-prolyl cis-trans isomerase GN=TGME49_283850	2	566.33	0.53536	0.011612	50.353	1
654	FINLGVSNKPGADAK	15	Unmodified	_FINLGVSNKPGADAK_	TGME49_263180-t26_1-p1	myosin D GN=TGME49_263180	3	510.947	-0.28938	0.011263	41.401	1
655	FKDGYLISTGEPSK	14	Unmodified	_FKDGYLISTGEPSK_	TGME49_232300-t26_1-p1	ribosomal protein RPS3 GN=TGME49_232300	3	514.6	0.98777	0.010045	43.592	1
656	FKPPISQTYDR	11	Unmodified	_FKPPISQTYDR_	TGME49_256000-t26_1-p1	endoplasmic reticulum retention receptor GN=TGME49_256000	3	451.238		0.0033942	31.478	1
657	FLAYTGR	7	Unmodified	_FLAYTGR_	TGME49_204050-t26_1-p1	subtilisin SUB1 GN=TGME49_204050	2	414.224	0.68583	0.0052497	87.284	1
658	FLAYTGR	7	Unmodified	_FLAYTGR_	TGME49_204050-t26_1-p1	subtilisin SUB1 GN=TGME49_204050	2	414.224	0.22804	0.013641	77.741	1
659	FLDITLTR	8	Unmodified	_FLDITLTR_	TGME49_299210-t26_1-p1	CTP synthase GN=TGME49_299210	2	489.785	0.01821	0.0028515	99.136	1
660	FLEECHDDK	9	Unmodified	_FLEECHDDK_	TGME49_247510-t26_1-p1	fructose-bisphospatase II GN=TGME49_247510	3	398.169	0.010976	0.0023555	63.076	1
661	FLGPAYR	7	Unmodified	_FLGPAYR_	TGME49_312630-t26_1-p1	anonymous antigen-1, putative GN=TGME49_312630	2	412.227	-0.17936	0.012148	78.994	1
662	FLGPAYR	7	Unmodified	_FLGPAYR_	TGME49_312630-t26_1-p1	anonymous antigen-1, putative GN=TGME49_312630	2	412.227	-0.3777	0.011766	79.454	1
663	FLIQEVIR	8	Unmodified	_FLIQEVIR_	TGME49_207640-t26_1-p1	isoleucyl-tRNA synthetase family protein GN=TGME49_207640	2	509.308	-0.14115	0.014829	69.825	1
664	FLIQEVIR	8	Unmodified	_FLIQEVIR_	TGME49_207640-t26_1-p1	isoleucyl-tRNA synthetase family protein GN=TGME49_207640	2	509.308	-3.8498	0.013499	71.379	1
665	FLIQSTAVSSDAPLAR	16	Unmodified	_FLIQSTAVSSDAPLAR_	TGME49_318160-t26_1-p1	MSP (Major sperm protein) domain-containing protein GN=TGME49_318160	2	838.454	0.30763	4.475e-06	62.861	1
666	FLIQSTAVSSDAPLAR	16	Unmodified	_FLIQSTAVSSDAPLAR_	TGME49_318160-t26_1-p1	MSP (Major sperm protein) domain-containing protein GN=TGME49_318160	2	838.454	0.51232	4.7908e-05	55.755	1
667	FLIQSTAVSSDAPLAR	16	Unmodified	_FLIQSTAVSSDAPLAR_	TGME49_318160-t26_1-p1	MSP (Major sperm protein) domain-containing protein GN=TGME49_318160	3	559.305	-1.0338	0.024165	20.524	1
668	FLNDDQHNHVEEGDGEVGGR	20	Unmodified	_FLNDDQHNHVEEGDGEVGGR_	TGME49_258870-t26_1-p1	Putative transmembrane protein(predict) GN=TGME49_258870	4	556.747	0.44093	1.0423e-05	51.798	1
669	FLNDDQHNHVEEGDGEVGGR	20	Unmodified	_FLNDDQHNHVEEGDGEVGGR_	TGME49_258870-t26_1-p1	Putative transmembrane protein(predict) GN=TGME49_258870	3	741.993	0.016577	4.5499e-09	57.366	1
670	FLQCEGR	7	Unmodified	_FLQCEGR_	TGME49_230420-t26_1-p1	sarco/endoplasmic reticulum Ca2+-ATPase GN=TGME49_230420	2	455.216	0.47092	0.012047	79.116	1
671	FLQCMQR	7	Unmodified	_FLQCMQR_	TGME49_234450-t26_1-p1	ribosomal protein RPS15A GN=TGME49_234450	2	491.733	-0.73924	0.0091249	97.596	1
672	FLQCMQR	7	Unmodified	_FLQCMQR_	TGME49_234450-t26_1-p1	ribosomal protein RPS15A GN=TGME49_234450	2	491.733	-0.58984	0.01112	107.74	1
673	FLSLHDASTPPTGQTGSSQETEAEK	25	Unmodified	_FLSLHDASTPPTGQTGSSQETEAEK_	TGME49_232050-t26_1-p1	DnaJ domain-containing protein GN=TGME49_232050	3	873.412	-0.18346	0.0070985	26.5	1
674	FLTASFDQK	9	Unmodified	_FLTASFDQK_	TGME49_224460-t26_1-p1	aminopeptidase n, putative GN=TGME49_224460	2	528.772	0.64781	0.011884	60.102	1
675	FLTDVTEVSSSR	12	Unmodified	_FLTDVTEVSSSR_	TGME49_310640-t26_1-p1	phosphorylase family protein GN=TGME49_310640	2	670.838	1.0081	5.6824e-05	76.073	1
676	FLTDVTEVSSSR	12	Unmodified	_FLTDVTEVSSSR_	TGME49_310640-t26_1-p1	phosphorylase family protein GN=TGME49_310640	2	670.838	0.48103	1.3926e-05	85.554	1
677	FMLLDVAR	8	Unmodified	_FMLLDVAR_	TGME49_263180-t26_1-p1	myosin D GN=TGME49_263180	2	482.768	-0.4649	0.013499	71.379	1
678	FMLLDVAR	8	Unmodified	_FMLLDVAR_	TGME49_263180-t26_1-p1	myosin D GN=TGME49_263180	2	482.768	-0.15488	0.0091391	76.478	1
679	FMQLDVGR	8	Oxidation (M)	_FM(ox)QLDVGR_	TGME49_235470-t26_1-p1	myosin A GN=TGME49_235470	2	491.245	-0.30807	0.032119	61.962	1
680	FMSGAQALVK	10	Unmodified	_FMSGAQALVK_	TGME49_251680-t26_1-p1	histamine-releasing factor, putative GN=TGME49_251680	2	526.284	0.42982	0.014313	46.406	1
681	FMSGAQALVK	10	Unmodified	_FMSGAQALVK_	TGME49_251680-t26_1-p1	histamine-releasing factor, putative GN=TGME49_251680	2	526.284	-0.95932	0.00567	60.102	1
682	FMSGAQALVKK	11	malon(K)	_FMSGAQALVK(ma)K_	TGME49_251680-t26_1-p1	histamine-releasing factor, putative GN=TGME49_251680	2	633.332	1.0442	0.0046741	53.034	1
683	FNEKEVQK	8	malon(K)	_FNEK(ma)EVQK_	TGME49_311720-t26_1-p1	chaperonin protein BiP GN=TGME49_311720	2	554.269	0.72836	0.016426	85.29	1
684	FNQSSWGK	8	Unmodified	_FNQSSWGK_	TGME49_267060-t26_1-p1	ribosomal protein RPL14 GN=TGME49_267060	2	477.227	-0.32559	0.01446	70.256	1
685	FNQSSWGK	8	Unmodified	_FNQSSWGK_	TGME49_267060-t26_1-p1	ribosomal protein RPL14 GN=TGME49_267060	2	477.227	0.34665	0.01446	70.256	1
686	FNTGPVGK	8	Unmodified	_FNTGPVGK_	TGME49_231970-t26_1-p1	pre-mRNA processing splicing factor PRP8 GN=TGME49_231970	2	410.222	0.32294	0.022301	61.962	1
687	FPDFIHTQK	9	Unmodified	_FPDFIHTQK_	TGME49_232250-t26_1-p1	catalase GN=TGME49_232250	3	378.198	0.5505	0.016361	37.789	1
688	FPDFIHTQK	9	Unmodified	_FPDFIHTQK_	TGME49_232250-t26_1-p1	catalase GN=TGME49_232250	3	378.198	-0.39326	0.0032284	57.55	1
689	FPGQLNSDLR	10	Unmodified	_FPGQLNSDLR_	TGME49_266960-t26_1-p1	beta tubulin GN=TGME49_266960	2	573.799	-1.1329	0.0081915	55.353	1
690	FPGQLNSDLR	10	Unmodified	_FPGQLNSDLR_	TGME49_266960-t26_1-p1	beta tubulin GN=TGME49_266960	2	573.799	-0.94061	0.0011498	80.706	3
691	FPLVSDLDK	9	Unmodified	_FPLVSDLDK_	TGME49_230410-t26_1-p1	peroxiredoxin PRX3 GN=TGME49_230410	2	517.282	1.1475	0.011459	48.284	1
692	FQAQHLTGR	9	Unmodified	_FQAQHLTGR_	TGME49_243730-t26_1-p1	rhoptry protein ROP9 GN=TGME49_243730	3	353.189	0.51551	0.008294	44.882	1
693	FQAQHLTGR	9	Unmodified	_FQAQHLTGR_	TGME49_243730-t26_1-p1	rhoptry protein ROP9 GN=TGME49_243730	2	529.281	3.0337	0.0044031	76.228	1
695	FQEVWNSASTK	11	Unmodified	_FQEVWNSASTK_	TGME49_234380-t26_1-p1	hypothetical protein GN=TGME49_234380	2	648.815	-0.29376	0.0049844	55.261	1
696	FQEVWNSASTK	11	Unmodified	_FQEVWNSASTK_	TGME49_234380-t26_1-p1	hypothetical protein GN=TGME49_234380	2	648.815	0.07591	0.0047212	56.205	1
697	FQTSEEK	7	Unmodified	_FQTSEEK_	TGME49_227360-t26_1-p1	ribosomal protein RPL3 GN=TGME49_227360	2	434.706	-0.14867	0.0081883	83.753	1
698	FQVKGTCHSIAIDK	14	malon(K)	_FQVK(ma)GTCHSIAIDK_	TGME49_310030-t26_1-p1	cyclase-associated protein, putative GN=TGME49_310030	3	563.947	0.13646	0.0001185	54.764	1
699	FSAAVTPGDQLR	12	Unmodified	_FSAAVTPGDQLR_	TGME49_229140-t26_1-p1	MaoC family domain-containing protein GN=TGME49_229140	2	631.33	-0.3706	7.7342e-05	73.082	1
700	FSADNLWYR	9	Unmodified	_FSADNLWYR_	TGME49_238050-t26_1-p1	nuclease and tudor domain-containing protein GN=TGME49_238050	2	586.28	0.54111	0.0054074	72.928	1
701	FSCLGAGGAR	10	Unmodified	_FSCLGAGGAR_	TGME49_226250-t26_1-p1	DEAD (Asp-Glu-Ala-Asp) box polypeptide DDX3X GN=TGME49_226250	2	498.24	-0.57853	0.0061721	59.067	1
702	FSIQAQLQHLQSK	13	Unmodified	_FSIQAQLQHLQSK_	TGME49_314830-t26_1-p1	pre-mRNA splicing factor subunit, putative GN=TGME49_314830	3	509.947	-0.46175	0.001716	43.03	1
703	FSSGAFLSEAR	11	Unmodified	_FSSGAFLSEAR_	TGME49_311230-t26_1-p1	Putative transmembrane protein(predict) GN=TGME49_311230	2	586.291	0.78965	0.0068513	48.568	1
704	FSSQVSSSR	9	Unmodified	_FSSQVSSSR_	TGME49_248390-t26_1-p1	ribosomal protein RPL26 GN=TGME49_248390	2	492.741	-0.49021	0.00074392	101.9	1
705	FSSQVSSSR	9	Unmodified	_FSSQVSSSR_	TGME49_248390-t26_1-p1	ribosomal protein RPL26 GN=TGME49_248390	2	492.741	-0.79861	0.0005361	91.867	1
706	FTALSHPEVLEPK	13	Unmodified	_FTALSHPEVLEPK_	TGME49_244560-t26_1-p1	heat shock protein 90, putative GN=TGME49_244560	3	489.933	-1.1391	0.00069228	46.768	1
707	FTALSHPEVLEPK	13	Unmodified	_FTALSHPEVLEPK_	TGME49_244560-t26_1-p1	heat shock protein 90, putative GN=TGME49_244560	3	489.933	-0.91867	0.0006641	47.301	1
708	FTELAQER	8	Unmodified	_FTELAQER_	TGME49_249390-t26_1-p1	glutamate/leucine/phenylalanine/valine dehydrogenase family protein GN=TGME49_249390	2	497.254	-1.0913	0.010471	74.92	1
709	FTFSGLHR	8	Unmodified	_FTFSGLHR_	TGME49_306650-t26_1-p1	Glycosyl transferase, putative(predict) GN=TGME49_306650	2	482.754	-0.97212	0.0014466	90.37	1
710	FTFSGLHR	8	Unmodified	_FTFSGLHR_	TGME49_306650-t26_1-p1	Glycosyl transferase, putative(predict) GN=TGME49_306650	2	482.754	-1.06	0.0013476	89.752	1
711	FTGCIGR	7	Unmodified	_FTGCIGR_	TGME49_299050-t26_1-p1	ribosomal protein RPL17 GN=TGME49_299050	2	405.7	-0.36189	0.010384	100.07	1
712	FTGCIGR	7	Unmodified	_FTGCIGR_	TGME49_299050-t26_1-p1	ribosomal protein RPL17 GN=TGME49_299050	2	405.7	-0.13042	0.0088137	97.071	1
713	FTLCPQLVPGR	11	Unmodified	_FTLCPQLVPGR_	TGME49_231850-t26_1-p1	serine-threonine phosophatase 2C (PP2C) GN=TGME49_231850	2	644.348	0.42121	0.013941	42.336	1
714	FTLLLLPTGTKK	12	malon(K)	_FTLLLLPTGTK(ma)K_	TGME49_279390-t26_1-p1	proliferation-associated protein 2G4, putative GN=TGME49_279390	2	709.419	0.11581	0.0023174	55.724	1
715	FTLLLLPTGTKK	12	malon(K)	_FTLLLLPTGTK(ma)K_	TGME49_279390-t26_1-p1	proliferation-associated protein 2G4, putative GN=TGME49_279390	2	709.419	0.60014	7.4801e-05	71.279	1
716	FTNFFLEPLMNR	12	Unmodified	_FTNFFLEPLMNR_	TGME49_294200-t26_1-p1	glucose-6-phosphate 1-dehydrogenase GN=TGME49_294200	2	764.884	0.053676	0.0050763	46.069	1
717	FTNPVNEK	8	Unmodified	_FTNPVNEK_	TGME49_262690-t26_1-p1	ribosomal protein RPL27 GN=TGME49_262690	2	474.743	0.0082898	0.0049266	82.75	1
718	FTQAGSEVSALLGR	14	Unmodified	_FTQAGSEVSALLGR_	TGME49_261950-t26_1-p1	ATP synthase beta subunit ATP-B GN=TGME49_261950	2	718.381	-0.060744	1.8255e-10	94.717	1
719	FTQAGSEVSALLGR	14	Unmodified	_FTQAGSEVSALLGR_	TGME49_261950-t26_1-p1	ATP synthase beta subunit ATP-B GN=TGME49_261950	3	479.256	0.71601	0.011013	28.351	1
720	FTVDCQKPVDDNIIEAK	17	Unmodified	_FTVDCQKPVDDNIIEAK_	TGME49_239760-t26_1-p1	ribosomal protein RPL22 GN=TGME49_239760	3	664.663	0.039944	0.00020192	53.565	1
721	FTVDCQKPVDDNIIEAK	17	Unmodified	_FTVDCQKPVDDNIIEAK_	TGME49_239760-t26_1-p1	ribosomal protein RPL22 GN=TGME49_239760	3	664.663	-0.15348	3.7177e-08	67.646	1
722	FVCLDSDGEEPR	12	Unmodified	_FVCLDSDGEEPR_	TGME49_290290-t26_1-p1	ubiquitin-activating enzyme E1 family protein GN=TGME49_290290	2	712.312	0.44547	0.013888	40.475	1
723	FVDDLETSLK	10	Unmodified	_FVDDLETSLK_	TGME49_227100-t26_1-p1	Glutaredoxin domain-containing protein(predict) GN=TGME49_227100	2	583.801	0.65614	0.02727	41.689	1
724	FVHNAWR	7	Unmodified	_FVHNAWR_	TGME49_217890-t26_1-p1	alkyl hydroperoxide reductase/ Thiol specific antioxidant/ Mal allergen, putative GN=TGME49_217890	2	465.241	0.18435	0.0056208	86.838	1
725	FVHNAWR	7	Unmodified	_FVHNAWR_	TGME49_217890-t26_1-p1	alkyl hydroperoxide reductase/ Thiol specific antioxidant/ Mal allergen, putative GN=TGME49_217890	2	465.241	0.038939	0.011025	106.76	1
726	FVIPAEVMNR	10	Unmodified	_FVIPAEVMNR_	TGME49_221470-t26_1-p1	hypothetical protein GN=TGME49_221470	2	588.316	0.368	0.027223	41.704	1
727	FVLDLLR	7	Unmodified	_FVLDLLR_	TGME49_299050-t26_1-p1	ribosomal protein RPL17 GN=TGME49_299050	2	438.271	-0.47633	0.0088117	97.068	1
728	FVLDLLR	7	Unmodified	_FVLDLLR_	TGME49_299050-t26_1-p1	ribosomal protein RPL17 GN=TGME49_299050	2	438.271	0.125	0.0090517	97.473	1
729	FVLPEATTSLK	11	Unmodified	_FVLPEATTSLK_	TGME49_211680-t26_1-p1	protein disulfide isomerase GN=TGME49_211680	2	603.342	1.0456	0.013384	42.629	1
730	FVLPEATTSLK	11	Unmodified	_FVLPEATTSLK_	TGME49_211680-t26_1-p1	protein disulfide isomerase GN=TGME49_211680	2	603.342	0.70489	0.0073641	46.73	1
731	FVLPEATTSLK	11	Unmodified	_FVLPEATTSLK_	TGME49_211680-t26_1-p1	protein disulfide isomerase GN=TGME49_211680	2	603.342		0.007056	42.031	1
732	FVMNQNK	7	Unmodified	_FVMNQNK_	TGME49_280380-t26_1-p1	poly(ADP-ribose) glycohydrolase GN=TGME49_280380	2	440.721		6.0531e-05	88.734	1
733	FVNDPETK	8	Unmodified	_FVNDPETK_	TGME49_290600-t26_1-p1	succinyl-CoA-synthetase alpha SCSA GN=TGME49_290600	2	475.235	-0.15087	0.021039	63.227	1
734	FVVVHDAFGSQSTK	14	Unmodified	_FVVVHDAFGSQSTK_	TGME49_289830-t26_1-p1	eukaryotic initiation factor-3, delta subunit, putative GN=TGME49_289830	3	507.928	1.2241	0.00045393	46.68	1
735	FVVVHDAFGSQSTK	14	Unmodified	_FVVVHDAFGSQSTK_	TGME49_289830-t26_1-p1	eukaryotic initiation factor-3, delta subunit, putative GN=TGME49_289830	2	761.388	-0.35371	0.010209	39.163	1
736	FWSAASSR	8	Unmodified	_FWSAASSR_	TGME49_204340-t26_1-p1	Putative transmembrane protein(predict) GN=TGME49_204340	2	456.222	-0.31283	0.011545	73.665	1
737	FWSAASSR	8	Unmodified	_FWSAASSR_	TGME49_204340-t26_1-p1	Putative transmembrane protein(predict) GN=TGME49_204340	2	456.222	0.29823	0.0019281	93.374	1
738	FYAPWCGHCK	10	Unmodified	_FYAPWCGHCK_	TGME49_211680-t26_1-p1	protein disulfide isomerase GN=TGME49_211680	3	442.523	-0.091325	0.00043047	73.233	1
739	FYAPWCGHCK	10	Unmodified	_FYAPWCGHCK_	TGME49_211680-t26_1-p1	protein disulfide isomerase GN=TGME49_211680	3	442.523	0.84354	0.00082297	64.654	2
740	FYAPWCGHCK	10	Unmodified	_FYAPWCGHCK_	TGME49_211680-t26_1-p1	protein disulfide isomerase GN=TGME49_211680	2	663.281	0.53297	0.013779	47.187	1
741	FYAPWCGHCK	10	Unmodified	_FYAPWCGHCK_	TGME49_211680-t26_1-p1	protein disulfide isomerase GN=TGME49_211680	3	442.523	-0.40288	0.0045167	44.318	1
742	FYAPWCGHCK	10	Unmodified	_FYAPWCGHCK_	TGME49_211680-t26_1-p1	protein disulfide isomerase GN=TGME49_211680	3	442.523	0.48171	0.00043523	72.928	2
743	FYAPWCGHCKR	11	malon(K)	_FYAPWCGHCK(ma)R_	TGME49_211680-t26_1-p1	protein disulfide isomerase GN=TGME49_211680	3	523.224	-0.28929	0.003928	55.261	1
744	FYDEFSR	7	Unmodified	_FYDEFSR_	TGME49_244560-t26_1-p1	heat shock protein 90, putative GN=TGME49_244560	2	482.214	-0.23263	6.3244e-07	134.85	1
745	FYDEFSR	7	Unmodified	_FYDEFSR_	TGME49_244560-t26_1-p1	heat shock protein 90, putative GN=TGME49_244560	2	482.214	0.054528	0.0070537	114.78	1
746	FYEQFSK	7	Unmodified	_FYEQFSK_	TGME49_288380-t26_1-p1	heat shock protein HSP90 GN=TGME49_288380	2	474.727	0.65672	0.0060877	92.47	1
747	FYEQFSK	7	Unmodified	_FYEQFSK_	TGME49_288380-t26_1-p1	heat shock protein HSP90 GN=TGME49_288380	2	474.727	1.196	0.01523	77.046	1
748	FYEQFSK	7	Unmodified	_FYEQFSK_	TGME49_288380-t26_1-p1	heat shock protein HSP90 GN=TGME49_288380	2	474.727	0.17232	0.0096351	98.457	1
749	FYETVVNQK	9	Unmodified	_FYETVVNQK_	TGME49_300140-t26_1-p1	elongation factor 1-gamma, putative GN=TGME49_300140	2	564.29	0.10539	0.0014362	85.676	1
750	FYETVVNQK	9	Unmodified	_FYETVVNQK_	TGME49_300140-t26_1-p1	elongation factor 1-gamma, putative GN=TGME49_300140	2	564.29	-0.011665	0.00063983	94.85	1
751	FYETVVNQKSFK	12	malon(K)	_FYETVVNQK(ma)SFK_	TGME49_300140-t26_1-p1	elongation factor 1-gamma, putative GN=TGME49_300140	2	788.388	0.29084	0.0090246	59.709	1
752	FYETVVNQKSFK	12	malon(K)	_FYETVVNQK(ma)SFK_	TGME49_300140-t26_1-p1	elongation factor 1-gamma, putative GN=TGME49_300140	2	788.388	0.12774	0.016325	53.3	1
753	FYMQGQGSK	9	Unmodified	_FYMQGQGSK_	TGME49_311470-t26_1-p1	rhoptry neck protein RON5 GN=TGME49_311470	2	523.242	-1.5799	0.0035673	78.939	1
754	FYQTEINDLVSK	12	Unmodified	_FYQTEINDLVSK_	TGME49_228170-t26_1-p1	inner membrane complex protein IMC2A GN=TGME49_228170	2	728.87	0.44124	8.6095e-05	71.806	1
755	FYTDDTPGLK	10	Unmodified	_FYTDDTPGLK_	TGME49_211040-t26_1-p1	Sec61beta family protein GN=TGME49_211040	2	578.78	0.2134	0.0074719	56.404	1
756	FYTDDTPGLK	10	Unmodified	_FYTDDTPGLK_	TGME49_211040-t26_1-p1	Sec61beta family protein GN=TGME49_211040	2	578.78	-0.079883	0.0073947	56.548	1
757	FYTFSNK	7	Unmodified	_FYTFSNK_	TGME49_280380-t26_1-p1	poly(ADP-ribose) glycohydrolase GN=TGME49_280380	2	453.721	0.59014	0.017317	76.134	1
758	FYTFSNK	7	Unmodified	_FYTFSNK_	TGME49_280380-t26_1-p1	poly(ADP-ribose) glycohydrolase GN=TGME49_280380	2	453.721	0.34936	0.017317	76.134	1
759	GAAEAFCR	8	Unmodified	_GAAEAFCR_	TGME49_271888-t26_1-p1	3-ketoacyl-CoA reductase, putative GN=TGME49_271888	2	441.2	-0.67639	0.0084508	77.282	1
764	GAGTANPLDSPR	12	Unmodified	_GAGTANPLDSPR_	TGME49_251430-t26_1-p1	hypothetical protein GN=TGME49_251430	3	385.863	-1.5215	0.0013142	45.433	1
765	GAGTLEVLLR	10	Unmodified	_GAGTLEVLLR_	TGME49_224890-t26_1-p1	AMP-binding enzyme(predict) GN=TGME49_224890	2	514.809	0.43179	0.00567	60.102	1
766	GALAISGER	9	Unmodified	_GALAISGER_	TGME49_289600-t26_1-p1	heat shock protein HSP29 GN=TGME49_289600	2	437.243	-1.1573	0.014002	56.916	1
767	GALAISGERPK	11	Unmodified	_GALAISGERPK_	TGME49_289600-t26_1-p1	heat shock protein HSP29 GN=TGME49_289600	3	366.88	-0.63723	0.0058391	61.344	1
768	GALPANDCR	9	Unmodified	_GALPANDCR_	TGME49_220400-t26_1-p1	actin depolymerizing factor ADF GN=TGME49_220400	2	487.23	-0.40189	0.0012908	86.136	1
769	GALPANDCR	9	Unmodified	_GALPANDCR_	TGME49_220400-t26_1-p1	actin depolymerizing factor ADF GN=TGME49_220400	2	487.23	-0.59757	0.00066249	95.502	1
770	GAMKSEACGAAACR	14	Oxidation (M),malon(K)	_GAM(ox)K(ma)SEACGAAACR_	TGME49_226960-t26_1-p1	phosphofructokinase PFKII GN=TGME49_226960	2	771.311	0.46599	0.00016051	54.281	1
771	GAMKSEACGAAACR	14	Oxidation (M),malon(K)	_GAM(ox)K(ma)SEACGAAACR_	TGME49_226960-t26_1-p1	phosphofructokinase PFKII GN=TGME49_226960	2	771.311	-0.7388	0.00035109	48.467	1
772	GAMKSEACGAAACR	14	malon(K)	_GAMK(ma)SEACGAAACR_	TGME49_226960-t26_1-p1	phosphofructokinase PFKII GN=TGME49_226960	2	763.313	-0.7926	1.8735e-05	70.167	1
773	GAMKSEACGAAACR	14	malon(K)	_GAMK(ma)SEACGAAACR_	TGME49_226960-t26_1-p1	phosphofructokinase PFKII GN=TGME49_226960	3	509.211	-0.78931	0.00016878	52.891	1
774	GAMKSEACGAAACR	14	malon(K)	_GAMK(ma)SEACGAAACR_	TGME49_226960-t26_1-p1	phosphofructokinase PFKII GN=TGME49_226960	2	763.313	-0.58437	0.00058686	64.224	1
775	GAMKSEACGAAACR	14	malon(K)	_GAMK(ma)SEACGAAACR_	TGME49_226960-t26_1-p1	phosphofructokinase PFKII GN=TGME49_226960	3	509.211	-0.01339	6.5914e-11	89.506	1
776	GAPLAEVSFR	10	Unmodified	_GAPLAEVSFR_	TGME49_204020-t26_1-p1	ribosomal protein RPL8 GN=TGME49_204020	2	523.785	-1.5716	0.014013	46.844	1
779	GAYFGLFDTAK	11	Unmodified	_GAYFGLFDTAK_	TGME49_249900-t26_1-p1	adenine nucleotide translocator, putative GN=TGME49_249900	2	595.298	0.33438	0.011533	43.604	1
780	GAYIDVYR	8	Unmodified	_GAYIDVYR_	TGME49_260500-t26_1-p1	COPI associated protein, putative GN=TGME49_260500	2	478.745	-0.37281	0.022301	61.962	1
781	GAYTTTLLR	9	Unmodified	_GAYTTTLLR_	TGME49_312630-t26_1-p1	anonymous antigen-1, putative GN=TGME49_312630	2	498.28	-0.54463	0.0067945	68.371	1
782	GCASTVAGAAR	11	Unmodified	_GCASTVAGAAR_	TGME49_224890-t26_1-p1	AMP-binding enzyme(predict) GN=TGME49_224890	2	510.748	-2.2566	0.0091738	44.847	1
783	GCATFLAQVIVLNHPGEIK	19	Unmodified	_GCATFLAQVIVLNHPGEIK_	TGME49_294800-t26_1-p1	elongation factor 1-alpha (EF-1-ALPHA), putative GN=TGME49_294800	3	689.707	-0.112	0.011656	25.586	1
784	GCEVVVSGK	9	Unmodified	_GCEVVVSGK_	TGME49_232300-t26_1-p1	ribosomal protein RPS3 GN=TGME49_232300	2	467.737	-0.29682	0.012014	59.908	1
785	GCEVVVSGK	9	Unmodified	_GCEVVVSGK_	TGME49_232300-t26_1-p1	ribosomal protein RPS3 GN=TGME49_232300	2	467.737	-0.067796	0.020378	52.579	1
786	GCFIHIR	7	Unmodified	_GCFIHIR_	TGME49_221470-t26_1-p1	hypothetical protein GN=TGME49_221470	2	451.737	0.40064	0.012148	78.994	1
787	GCFIHIR	7	Unmodified	_GCFIHIR_	TGME49_221470-t26_1-p1	hypothetical protein GN=TGME49_221470	2	451.737	-0.34688	0.01015	111.69	1
788	GCGIVEYTNVEDAQK	15	Unmodified	_GCGIVEYTNVEDAQK_	TGME49_262620-t26_1-p1	RNA recognition motif-containing protein GN=TGME49_262620	2	841.888	0.059684	4.4926e-05	62.357	1
789	GCGIVEYTNVEDAQK	15	Unmodified	_GCGIVEYTNVEDAQK_	TGME49_262620-t26_1-p1	RNA recognition motif-containing protein GN=TGME49_262620	2	841.888	-0.2753	3.3769e-07	74.853	1
790	GCGMSVLEMSHR	12	Unmodified	_GCGMSVLEMSHR_	TGME49_218780-t26_1-p1	phosphoserine aminotransferase, putative GN=TGME49_218780	3	455.202	-0.47046	0.018886	25.982	1
791	GCLVHSELRPSIILIHSGSDR	21	Unmodified	_GCLVHSELRPSIILIHSGSDR_	TGME49_202620-t26_1-p1	Putative transmembrane protein(predict) GN=TGME49_202620	4	587.314	0.051997	5.6938e-07	47.082	1
792	GDAVILILR	9	Unmodified	_GDAVILILR_	TGME49_270830-t26_1-p1	small nuclear ribonucleoprotein GN=TGME49_270830	2	485.308	-0.011413	0.0052112	73.573	1
793	GDDAVSHSSITGDCDLNR	18	Unmodified	_GDDAVSHSSITGDCDLNR_	TGME49_283510-t26_1-p1	IMC-associated protein 1(predict) GN=TGME49_283510	3	640.278	0.41577	0.0070669	26.412	1
794	GDFFYTYPHQFTK	13	Unmodified	_GDFFYTYPHQFTK_	TGME49_297070-t26_1-p1	Alpha-carbonic anhydrase domain-containing protein(predict) GN=TGME49_297070	3	550.924	0.48953	0.025957	22.097	1
795	GDVQLDQTEEEK	12	Unmodified	_GDVQLDQTEEEK_	TGME49_244560-t26_1-p1	heat shock protein 90, putative GN=TGME49_244560	2	695.82	0.098862	3.313e-10	110.31	1
796	GDYVDIVCDPSVQK	14	Unmodified	_GDYVDIVCDPSVQK_	TGME49_245680-t26_1-p1	ribosomal protein RPL21 GN=TGME49_245680	2	797.875	0.17876	0.020356	33.842	1
797	GEEHTPIIHFLTTK	14	Unmodified	_GEEHTPIIHFLTTK_	TGME49_219270-t26_1-p1	multi-pass transmembrane protein GN=TGME49_219270	3	541.623	-0.022783	0.015812	24.084	1
798	GEEHTPIIHFLTTK	14	Unmodified	_GEEHTPIIHFLTTK_	TGME49_219270-t26_1-p1	multi-pass transmembrane protein GN=TGME49_219270	4	406.469	-0.44682	0.0066736	38.995	1
799	GEEHTPIIHFLTTK	14	Unmodified	_GEEHTPIIHFLTTK_	TGME49_219270-t26_1-p1	multi-pass transmembrane protein GN=TGME49_219270	3	541.623	-0.4363	0.00021348	53.3	1
800	GEHTPPLPDER	11	Unmodified	_GEHTPPLPDER_	TGME49_227620-t26_1-p1	dense granule protein GRA2 GN=TGME49_227620	3	416.539	0.72825	0.005935	36.528	1
801	GEHTPPLPDER	11	Unmodified	_GEHTPPLPDER_	TGME49_227620-t26_1-p1	dense granule protein GRA2 GN=TGME49_227620	3	416.539	0.80344	0.019174	27.378	2
802	GEHTPPLPDER	11	Unmodified	_GEHTPPLPDER_	TGME49_227620-t26_1-p1	dense granule protein GRA2 GN=TGME49_227620	2	624.304	0.54683	0.010978	43.897	1
803	GEKAKQTTGEK	11	2 malon(K)	_GEK(ma)AK(ma)QTTGEK_	TGME49_226840-t26_1-p1	JmjC domain-containing protein(predict) GN=TGME49_226840	2	674.815	-1.3889	0.0045912	45.992	1
804	GESDACLNR	9	Unmodified	_GESDACLNR_	TGME49_259240-t26_1-p1	ribosomal protein RPS21 GN=TGME49_259240	2	511.222	-1.2118	0.00073667	97.635	1
805	GESGSEGSLSEK	12	Unmodified	_GESGSEGSLSEK_	TGME49_319560-t26_1-p1	microneme protein MIC3 GN=TGME49_319560	2	583.762	0.13663	0.0037305	51.726	1
806	GETKNDEELSR	11	malon(K)	_GETK(ma)NDEELSR_	TGME49_222020-t26_1-p1	phosphoglycerate kinase PGKII GN=TGME49_222020	2	682.302	0.24538	9.2274e-06	97.69	1
807	GETKNDEELSR	11	malon(K)	_GETK(ma)NDEELSR_	TGME49_222020-t26_1-p1	phosphoglycerate kinase PGKII GN=TGME49_222020	2	682.302	0.30454	2.4255e-06	104.17	1
808	GFHFTTVHR	9	Unmodified	_GFHFTTVHR_	TGME49_306060-t26_1-p1	rhoptry neck protein RON8 GN=TGME49_306060	3	367.858	-0.23938	0.0022831	63.534	1
809	GFLETAELYR	10	Unmodified	_GFLETAELYR_	TGME49_223920-t26_1-p1	rhoptry neck protein RON3 GN=TGME49_223920	2	599.809	1.9518	0.012551	48.981	1
810	GFLTDYIPGAK	11	Unmodified	_GFLTDYIPGAK_	TGME49_308020-t26_1-p1	SAG-related sequence SRS57 GN=TGME49_308020	2	591.314	0.34897	0.0055562	53.211	1
811	GFLTDYIPGAK	11	Unmodified	_GFLTDYIPGAK_	TGME49_308020-t26_1-p1	SAG-related sequence SRS57 GN=TGME49_308020	2	591.314	0.95313	0.0017884	63.624	1
812	GFTLEELK	8	Unmodified	_GFTLEELK_	TGME49_263050-t26_1-p1	ribosomal protein RPL13 GN=TGME49_263050	2	468.755	0.57601	0.0038605	84.498	1
813	GFVAVGHLGDSR	12	Unmodified	_GFVAVGHLGDSR_	TGME49_231850-t26_1-p1	serine-threonine phosophatase 2C (PP2C) GN=TGME49_231850	3	405.547	-0.31812	0.0033408	40.377	1
814	GFYDGVLLVGPCAGQK	16	Unmodified	_GFYDGVLLVGPCAGQK_	TGME49_292080-t26_1-p1	leucyl-tRNA synthetase GN=TGME49_292080	2	840.924	0.67216	0.032734	27.767	1
815	GGDAEAKGGIAGK	13	malon(K)	_GGDAEAK(ma)GGIAGK_	TGME49_242890-t26_1-p1	BLM10_mid domain-containing protein (Fragment)(predict) GN=TGME49_242890	2	608.794	0.31571	0.0028767	58.885	1
816	GGDFSFR	7	Unmodified	_GGDFSFR_	TGME49_231850-t26_1-p1	serine-threonine phosophatase 2C (PP2C) GN=TGME49_231850	2	393.182	1.1402	0.0072354	94.407	1
817	GGGFQNISR	9	Unmodified	_GGGFQNISR_	TGME49_223920-t26_1-p1	rhoptry neck protein RON3 GN=TGME49_223920	2	468.238	0.047341	0.0050286	74.173	1
818	GGGMFAPNK	9	Unmodified	_GGGMFAPNK_	TGME49_309120-t26_1-p1	ribosomal protein RPL4 GN=TGME49_309120	2	439.713	-0.2584	0.024485	49.96	1
819	GGGSYYGR	8	Unmodified	_GGGSYYGR_	TGME49_235930-t26_1-p1	domain K- type RNA binding proteins family protein GN=TGME49_235930	2	408.685	0.37006	0.027525	56.721	1
820	GGLEGEEQR	9	Unmodified	_GGLEGEEQR_	TGME49_223050-t26_1-p1	ribosomal protein RPS20 GN=TGME49_223050	2	487.731	0.16044	0.0094717	52.49	1
821	GGLLFGPR	8	Unmodified	_GGLLFGPR_	TGME49_295110-t26_1-p1	rhoptry protein ROP7 GN=TGME49_295110	2	408.74	-0.31746	0.0021607	87.284	1
822	GGLLFGPR	8	Unmodified	_GGLLFGPR_	TGME49_295110-t26_1-p1	rhoptry protein ROP7 GN=TGME49_295110	2	408.74	-0.25846	0.01468	69.998	1
823	GGPAAGVVFQVHQSK	15	Unmodified	_GGPAAGVVFQVHQSK_	TGME49_221470-t26_1-p1	hypothetical protein GN=TGME49_221470	3	494.6	0.55236	0.00014133	50.806	1
824	GGPAAGVVFQVHQSK	15	Unmodified	_GGPAAGVVFQVHQSK_	TGME49_221470-t26_1-p1	hypothetical protein GN=TGME49_221470	3	494.6	-0.074723	0.010823	25.965	1
825	GGQAGDPKLTNSAK	14	malon(K)	_GGQAGDPK(ma)LTNSAK_	TGME49_240890-t26_1-p1	6-phosphofructokinase GN=TGME49_240890	2	715.35	1.0221	0.0027802	55.437	1
826	GGQAGDPKLTNSAK	14	malon(K)	_GGQAGDPK(ma)LTNSAK_	TGME49_240890-t26_1-p1	6-phosphofructokinase GN=TGME49_240890	2	715.35	-0.19057	0.00082533	62.94	1
827	GGVFLTGFEHLVR	13	Unmodified	_GGVFLTGFEHLVR_	TGME49_215775-t26_1-p1	rhoptry protein ROP8 GN=TGME49_215775	3	477.93	-0.45669	0.00038536	52.576	1
828	GGVYVQPSAGAPSEAR	16	Unmodified	_GGVYVQPSAGAPSEAR_	TGME49_301270-t26_1-p1	Tyrosine kinase-like (TKL) protein GN=TGME49_301270	3	515.927	-3.5143	0.0081855	27.263	1
829	GGYFDNYGIIR	11	Unmodified	_GGYFDNYGIIR_	TGME49_278830-t26_1-p1	glucose-6-phosphate 1-dehydrogenase GN=TGME49_278830	2	637.812		0.0064733	46.352	1
830	GGYGGASGSQGGSYSADLK	19	Unmodified	_GGYGGASGSQGGSYSADLK_	TGME49_318160-t26_1-p1	MSP (Major sperm protein) domain-containing protein GN=TGME49_318160	2	859.884	0.30506	3.5194e-08	58.024	1
831	GHCLLHVTLSAR	12	Unmodified	_GHCLLHVTLSAR_	TGME49_308840-t26_1-p1	SAG-related sequence SRS51 GN=TGME49_308840	3	455.247	-0.068649	5.9871e-05	66.663	1
832	GHCLLHVTLSAR	12	Unmodified	_GHCLLHVTLSAR_	TGME49_308840-t26_1-p1	SAG-related sequence SRS51 GN=TGME49_308840	2	682.367	0.28748	1.4053e-05	85.522	1
833	GHVFHEEQR	9	Unmodified	_GHVFHEEQR_	TGME49_205470-t26_1-p1	translation elongation factor 2 family protein, putative GN=TGME49_205470	3	380.184	1.2103	0.00089882	78.264	1
834	GHVFHEEQR	9	Unmodified	_GHVFHEEQR_	TGME49_205470-t26_1-p1	translation elongation factor 2 family protein, putative GN=TGME49_205470	3	380.184	1.4508	0.00089882	78.264	1
835	GHVFHEEQR	9	Unmodified	_GHVFHEEQR_	TGME49_205470-t26_1-p1	translation elongation factor 2 family protein, putative GN=TGME49_205470	3	380.184	3.8933	6.2721e-05	115.71	1
836	GHVSAGYGR	9	Unmodified	_GHVSAGYGR_	TGME49_310490-t26_1-p1	ribosomal protein RPL27A GN=TGME49_310490	2	452.225	-0.90367	0.0053378	73.157	1
837	GHYTIGK	7	Unmodified	_GHYTIGK_	TGME49_316400-t26_1-p1	alpha tubulin TUBA1 GN=TGME49_316400	2	388.208	0.88873	0.006851	85.359	1
838	GHYTIGK	7	Unmodified	_GHYTIGK_	TGME49_316400-t26_1-p1	alpha tubulin TUBA1 GN=TGME49_316400	2	388.208	-0.83771	0.011113	107.67	1
839	GHYTIGK	7	Unmodified	_GHYTIGK_	TGME49_316400-t26_1-p1	alpha tubulin TUBA1 GN=TGME49_316400	2	388.208	0.40435	0.009393	82.305	1
840	GIAAVYGVK	9	Unmodified	_GIAAVYGVK_	TGME49_264660-t26_1-p1	SAG-related sequence SRS44 GN=TGME49_264660	2	439.261	0.077979	0.012629	58.981	1
841	GIAAVYGVK	9	Unmodified	_GIAAVYGVK_	TGME49_264660-t26_1-p1	SAG-related sequence SRS44 GN=TGME49_264660	2	439.261	-0.04076	0.02275	51.066	1
842	GIAKLLSAPR	10	malon(K)	_GIAK(ma)LLSAPR_	TGME49_219850-t26_1-p1	prolyl-tRNA synthetase (ProRS) GN=TGME49_219850	2	556.327	0.38887	0.020527	63.091	1
843	GIFDLSERPK	10	Unmodified	_GIFDLSERPK_	TGME49_278830-t26_1-p1	glucose-6-phosphate 1-dehydrogenase GN=TGME49_278830	3	387.88	-0.12153	0.003612	75.387	1
844	GILAADESTGTIK	13	Unmodified	_GILAADESTGTIK_	TGME49_236040-t26_1-p1	fructose-1,6-bisphosphate aldolase GN=TGME49_236040	2	638.343	0.24275	2.135e-07	77.894	1
845	GILAADESTGTIKK	14	malon(K)	_GILAADESTGTIK(ma)K_	TGME49_236040-t26_1-p1	fructose-1,6-bisphosphate aldolase GN=TGME49_236040	2	745.391	0.37323	2.5488e-08	80.738	1
846	GILAADESTGTIKK	14	malon(K)	_GILAADESTGTIK(ma)K_	TGME49_236040-t26_1-p1	fructose-1,6-bisphosphate aldolase GN=TGME49_236040	2	745.391	-0.68084	9.7886e-17	118.21	1
847	GIQAATSHLLGTNFAK	16	Unmodified	_GIQAATSHLLGTNFAK_	TGME49_219850-t26_1-p1	prolyl-tRNA synthetase (ProRS) GN=TGME49_219850	3	543.63	-0.11981	0.004698	31.614	1
848	GIVMVEQKVSK	11	Oxidation (M),malon(K)	_GIVM(ox)VEQK(ma)VSK_	TGME49_272910-t26_1-p1	T-complex protein 1 delta subunit GN=TGME49_272910	2	660.347	-0.29896	0.0010168	56.139	1
849	GIVMVEQKVSK	11	malon(K)	_GIVMVEQK(ma)VSK_	TGME49_272910-t26_1-p1	T-complex protein 1 delta subunit GN=TGME49_272910	2	652.35	0.84613	0.025583	54.276	1
850	GIVMVEQKVSK	11	malon(K)	_GIVMVEQK(ma)VSK_	TGME49_272910-t26_1-p1	T-complex protein 1 delta subunit GN=TGME49_272910	2	652.35	0.26381	0.00027832	85.536	1
851	GIYSYGFEK	9	Unmodified	_GIYSYGFEK_	TGME49_250770-t26_1-p1	eukaryotic initiation factor-4A, putative GN=TGME49_250770	2	532.258	0.92154	0.0058075	71.614	1
852	GIYSYGFEKPSAIQQR	16	Unmodified	_GIYSYGFEKPSAIQQR_	TGME49_250770-t26_1-p1	eukaryotic initiation factor-4A, putative GN=TGME49_250770	3	615.316	0.97674	0.010351	40.187	1
853	GIYSYGFEKPSAIQQR	16	Unmodified	_GIYSYGFEKPSAIQQR_	TGME49_250770-t26_1-p1	eukaryotic initiation factor-4A, putative GN=TGME49_250770	3	615.316	0.70914	0.00058692	51.591	1
854	GIYSYGFEKPSAIQQR	16	Unmodified	_GIYSYGFEKPSAIQQR_	TGME49_250770-t26_1-p1	eukaryotic initiation factor-4A, putative GN=TGME49_250770	2	922.471	0.86282	0.020166	41.088	1
855	GKDISTNSR	9	malon(K)	_GK(ma)DISTNSR_	TGME49_273760-t26_1-p1	heat shock protein HSP70 GN=TGME49_273760	2	532.254	1.3631	0.0057753	86.463	1
856	GKMDGEVVEISPSGK	15	malon(K)	_GK(ma)MDGEVVEISPSGK_	TGME49_313290-t26_1-p1	MORN repeat-containing protein GN=TGME49_313290	2	809.885	2.0914	0.003411	49.595	1
857	GKPTNLSITEVAHGLAR	17	Unmodified	_GKPTNLSITEVAHGLAR_	TGME49_236040-t26_1-p1	fructose-1,6-bisphosphate aldolase GN=TGME49_236040	3	588.664	0.73738	1.8792e-06	65.467	1
858	GKPTNLSITEVAHGLAR	17	Unmodified	_GKPTNLSITEVAHGLAR_	TGME49_236040-t26_1-p1	fructose-1,6-bisphosphate aldolase GN=TGME49_236040	4	441.75	0.33311	2.1829e-09	67.685	1
859	GKPTNLSITEVAHGLAR	17	Unmodified	_GKPTNLSITEVAHGLAR_	TGME49_236040-t26_1-p1	fructose-1,6-bisphosphate aldolase GN=TGME49_236040	3	588.664	0.70522	3.7251e-06	63.682	1
860	GKPTNLSITEVAHGLAR	17	Unmodified	_GKPTNLSITEVAHGLAR_	TGME49_236040-t26_1-p1	fructose-1,6-bisphosphate aldolase GN=TGME49_236040	4	441.75	-0.4702	2.3685e-16	89.484	1
861	GKPTNLSITEVAHGLAR	17	Unmodified	_GKPTNLSITEVAHGLAR_	TGME49_236040-t26_1-p1	fructose-1,6-bisphosphate aldolase GN=TGME49_236040	2	882.492	0.33833	0.0082277	43.37	1
862	GKTLVEALDTMEAPK	15	malon(K)	_GK(ma)TLVEALDTMEAPK_	TGME49_294800-t26_1-p1	elongation factor 1-alpha (EF-1-ALPHA), putative GN=TGME49_294800	2	844.924	0.093356	0.00037145	58.848	1
863	GLASPLLAGSLDGAQASAHAK	21	Unmodified	_GLASPLLAGSLDGAQASAHAK_	TGME49_268200-t26_1-p1	RNA recognition motif-containing protein GN=TGME49_268200	3	645.681	0.97711	9.5067e-05	43.696	1
864	GLCAMAQAESLR	12	Unmodified	_GLCAMAQAESLR_	TGME49_232300-t26_1-p1	ribosomal protein RPS3 GN=TGME49_232300	2	653.816	-0.45463	0.015397	39.581	1
865	GLDCMLGSR	9	Oxidation (M)	_GLDCM(ox)LGSR_	TGME49_288650-t26_1-p1	dense granule protein GRA12 GN=TGME49_288650	2	512.731	-0.061568	0.0043409	80.688	1
866	GLDCMLGSR	9	Unmodified	_GLDCMLGSR_	TGME49_288650-t26_1-p1	dense granule protein GRA12 GN=TGME49_288650	2	504.734	-0.42722	0.013117	58.246	1
867	GLDFPLSFR	9	Unmodified	_GLDFPLSFR_	TGME49_272660-t26_1-p1	Inhibitor of cysteine protease 2(predict) GN=TGME49_272660	2	526.282	-0.50846	0.015856	55.461	1
868	GLELEDDEEEK	11	Unmodified	_GLELEDDEEEK_	TGME49_288380-t26_1-p1	heat shock protein HSP90 GN=TGME49_288380	2	653.288	-0.6665	7.3087e-05	84.479	1
869	GLELEDDEEEK	11	Unmodified	_GLELEDDEEEK_	TGME49_288380-t26_1-p1	heat shock protein HSP90 GN=TGME49_288380	2	653.288	-0.46639	9.2577e-05	83.182	1
870	GLELEDDEEEKK	12	Unmodified	_GLELEDDEEEKK_	TGME49_288380-t26_1-p1	heat shock protein HSP90 GN=TGME49_288380	3	478.56	-0.60468	0.010881	31.881	1
871	GLETLPLTDDEK	12	Unmodified	_GLETLPLTDDEK_	TGME49_236040-t26_1-p1	fructose-1,6-bisphosphate aldolase GN=TGME49_236040	2	665.84	0.50071	5.6824e-05	76.073	1
872	GLGFDTETK	9	Unmodified	_GLGFDTETK_	TGME49_226960-t26_1-p1	phosphofructokinase PFKII GN=TGME49_226960	2	484.24	-1.1343	0.0025083	82.287	1
873	GLGFDTETK	9	Unmodified	_GLGFDTETK_	TGME49_226960-t26_1-p1	phosphofructokinase PFKII GN=TGME49_226960	2	484.24	0.11343	0.00064201	105.52	1
874	GLHEVAK	7	Unmodified	_GLHEVAK_	TGME49_205340-t26_1-p1	ribosomal protein RPS12 GN=TGME49_205340	2	377.216	3.5199	0.010535	101.64	1
875	GLHTKEFFSR	10	malon(K)	_GLHTK(ma)EFFSR_	TGME49_249390-t26_1-p1	glutamate/leucine/phenylalanine/valine dehydrogenase family protein GN=TGME49_249390	3	436.551	0.26604	0.0022247	48.822	1
876	GLHTKEFFSR	10	malon(K)	_GLHTK(ma)EFFSR_	TGME49_249390-t26_1-p1	glutamate/leucine/phenylalanine/valine dehydrogenase family protein GN=TGME49_249390	3	436.551	0.24183	0.00080577	62.338	1
877	GLILYPATVGR	11	Unmodified	_GLILYPATVGR_	TGME49_309210-t26_1-p1	peroxiredoxin 6, putative GN=TGME49_309210	2	580.345	0.31232	0.0017884	63.624	1
878	GLLEEER	7	Unmodified	_GLLEEER_	TGME49_231640-t26_1-p1	alveolin domain containing intermediate filament IMC1 GN=TGME49_231640	2	423.222	0.42227	0.026462	72.138	1
879	GLLNYLEENPGK	12	Unmodified	_GLLNYLEENPGK_	TGME49_280380-t26_1-p1	poly(ADP-ribose) glycohydrolase GN=TGME49_280380	2	673.851	-0.14503	0.0046854	47.712	1
880	GLLNYLEENPGK	12	Unmodified	_GLLNYLEENPGK_	TGME49_280380-t26_1-p1	poly(ADP-ribose) glycohydrolase GN=TGME49_280380	2	673.851	0.27809	0.005055	46.159	1
881	GLLQLFTEK	9	Unmodified	_GLLQLFTEK_	TGME49_297880-t26_1-p1	dense granule protein DG32 GN=TGME49_297880	2	524.806	-0.50133	0.013233	56.013	1
882	GLLTNDCVVIGEK	13	Unmodified	_GLLTNDCVVIGEK_	TGME49_226960-t26_1-p1	phosphofructokinase PFKII GN=TGME49_226960	2	709.371	0.97798	0.00069233	57.434	1
883	GLLTNDCVVIGEK	13	Unmodified	_GLLTNDCVVIGEK_	TGME49_226960-t26_1-p1	phosphofructokinase PFKII GN=TGME49_226960	2	709.371	0.45858	0.00016301	65.043	1
884	GLNCSAETFFACQGR	15	Unmodified	_GLNCSAETFFACQGR_	TGME49_310640-t26_1-p1	phosphorylase family protein GN=TGME49_310640	2	859.375	0.040609	0.019796	32.702	1
885	GLQTLLYR	8	Unmodified	_GLQTLLYR_	TGME49_228170-t26_1-p1	inner membrane complex protein IMC2A GN=TGME49_228170	2	482.285	0.16505	3.4828e-08	133.12	1
886	GLQTLLYR	8	Unmodified	_GLQTLLYR_	TGME49_228170-t26_1-p1	inner membrane complex protein IMC2A GN=TGME49_228170	2	482.285	-0.04653	0.0016925	111.82	1
887	GLSEADACER	10	Unmodified	_GLSEADACER_	TGME49_230420-t26_1-p1	sarco/endoplasmic reticulum Ca2+-ATPase GN=TGME49_230420	2	554.24		0.026739	32.159	1
888	GLSIEESPYFK	11	Unmodified	_GLSIEESPYFK_	TGME49_214320-t26_1-p1	facilitative glucose transporter GT1 GN=TGME49_214320	2	635.322	-1.0266	0.0076644	45.653	1
889	GLSLVAQSSK	10	Unmodified	_GLSLVAQSSK_	TGME49_294250-t26_1-p1	WD domain, G-beta repeat-containing protein GN=TGME49_294250	2	495.285	0.66857	0.008014	45.433	1
890	GLSNYDGSEEK	11	Unmodified	_GLSNYDGSEEK_	TGME49_312630-t26_1-p1	anonymous antigen-1, putative GN=TGME49_312630	2	599.765	-0.068278	3.708e-06	94.767	1
891	GLSNYDGSEEKTAIR	15	malon(K)	_GLSNYDGSEEK(ma)TAIR_	TGME49_312630-t26_1-p1	anonymous antigen-1, putative GN=TGME49_312630	2	863.4	0.030514	0.019447	42.633	1
892	GLSNYDGSEEKTAIR	15	malon(K)	_GLSNYDGSEEK(ma)TAIR_	TGME49_312630-t26_1-p1	anonymous antigen-1, putative GN=TGME49_312630	2	863.4	-0.095523	2.8399e-14	104.88	1
893	GLSNYDGSEEKTAIR	15	malon(K)	_GLSNYDGSEEK(ma)TAIR_	TGME49_312630-t26_1-p1	anonymous antigen-1, putative GN=TGME49_312630	2	863.4	0.17387	3.0055e-08	80.859	1
894	GLVNFAR	7	Unmodified	_GLVNFAR_	TGME49_288650-t26_1-p1	dense granule protein GRA12 GN=TGME49_288650	2	388.724	-0.28401	0.0094282	82.263	1
895	GLVSEVIR	8	Unmodified	_GLVSEVIR_	TGME49_295350-t26_1-p1	nucleoside diphosphate kinase, putative GN=TGME49_295350	2	436.764	0.59096	0.0014148	113.41	1
896	GLYHLEGHR	9	Unmodified	_GLYHLEGHR_	TGME49_218780-t26_1-p1	phosphoserine aminotransferase, putative GN=TGME49_218780	3	361.189	-0.92035	0.02501	35.269	1
897	GLYQITK	7	Unmodified	_GLYQITK_	TGME49_221380-t26_1-p1	alba 1 GN=TGME49_221380	2	411.74	0.12568	0.0046296	88.029	1
898	GMDDGAFVR	9	Unmodified	_GMDDGAFVR_	TGME49_258870-t26_1-p1	Putative transmembrane protein(predict) GN=TGME49_258870	2	484.219	0.21879	0.0062207	70.256	1
899	GMGSLDAMR	9	Unmodified	_GMGSLDAMR_	TGME49_233110-t26_1-p1	IMP dehydrogenas GN=TGME49_233110	2	469.215	1.2318	0.030695	46.001	1
900	GMPYSYYHGR	10	Unmodified	_GMPYSYYHGR_	TGME49_245680-t26_1-p1	ribosomal protein RPL21 GN=TGME49_245680	3	410.85	0.014642	0.0094544	37.717	1
901	GMVGIVAGGGR	11	Unmodified	_GMVGIVAGGGR_	TGME49_204020-t26_1-p1	ribosomal protein RPL8 GN=TGME49_204020	2	487.266	-0.020585	0.00034125	67.334	1
902	GMVGIVAGGGR	11	Unmodified	_GMVGIVAGGGR_	TGME49_204020-t26_1-p1	ribosomal protein RPL8 GN=TGME49_204020	2	487.266	-1.4462	0.00031017	69.275	1
903	GMVGVLAVDCGESAK	15	Unmodified	_GMVGVLAVDCGESAK_	TGME49_209950-t26_1-p1	thioredoxin, putative GN=TGME49_209950	2	746.86	-0.48753	6.1126e-05	60.549	1
904	GNACQKPVR	9	malon(K)	_GNACQK(ma)PVR_	TGME49_242380-t26_1-p1	fatty acid elongase GN=TGME49_242380	2	558.267	-1.07	0.023471	74.841	1
905	GNACQKPVR	9	malon(K)	_GNACQK(ma)PVR_	TGME49_242380-t26_1-p1	fatty acid elongase GN=TGME49_242380	2	558.267	-0.84994	0.003904	99.53	1
906	GNADEFR	7	Unmodified	_GNADEFR_	TGME49_220400-t26_1-p1	actin depolymerizing factor ADF GN=TGME49_220400	2	404.683	-0.088264	0.0042502	89.369	1
907	GNADEFR	7	Unmodified	_GNADEFR_	TGME49_220400-t26_1-p1	actin depolymerizing factor ADF GN=TGME49_220400	2	404.683	0.827	0.0052497	87.284	1
908	GNADSQLMNTAK	12	Unmodified	_GNADSQLMNTAK_	TGME49_249900-t26_1-p1	adenine nucleotide translocator, putative GN=TGME49_249900	2	625.296	1.4141	0.00958	43.03	1
909	GNADSQLMNTAK	12	Unmodified	_GNADSQLMNTAK_	TGME49_249900-t26_1-p1	adenine nucleotide translocator, putative GN=TGME49_249900	2	625.296	-0.22314	0.00094374	63.662	1
910	GNAPGFTASSR	11	Unmodified	_GNAPGFTASSR_	TGME49_216670-t26_1-p1	FUSE-binding protein 2 / KH-type splicing regulatory protein GN=TGME49_216670	2	532.76	0.71787	0.0068513	48.568	1
911	GNECIFAGPR	10	Unmodified	_GNECIFAGPR_	TGME49_264660-t26_1-p1	SAG-related sequence SRS44 GN=TGME49_264660	2	560.764	-2.2624	0.0021981	67.334	1
912	GNECIFAGPR	10	Unmodified	_GNECIFAGPR_	TGME49_264660-t26_1-p1	SAG-related sequence SRS44 GN=TGME49_264660	2	560.764	-2.0703	0.0039079	63.734	1
913	GNPCKVVDYSTSK	13	malon(K)	_GNPCK(ma)VVDYSTSK_	TGME49_251810-t26_1-p1	translation initiation factor eIF-5A, putative GN=TGME49_251810	2	770.851	-0.094833	0.0012764	63.614	1
914	GNPCKVVDYSTSK	13	malon(K)	_GNPCK(ma)VVDYSTSK_	TGME49_251810-t26_1-p1	translation initiation factor eIF-5A, putative GN=TGME49_251810	2	770.851	-0.17815	0.012924	47.916	1
915	GNSLGDAGGAGDR	13	Unmodified	_GNSLGDAGGAGDR_	TGME49_273090-t26_1-p1	cell division protein CDC48CY GN=TGME49_273090	2	573.76	-0.22395	0.00022836	64.104	1
916	GNYVSIHASGFR	12	Unmodified	_GNYVSIHASGFR_	TGME49_216860-t26_1-p1	DEAD (Asp-Glu-Ala-Asp) box polypeptide DDX39 GN=TGME49_216860	3	436.555	0.70505	0.0008933	51.612	1
917	GNYVSIHASGFR	12	Unmodified	_GNYVSIHASGFR_	TGME49_216860-t26_1-p1	DEAD (Asp-Glu-Ala-Asp) box polypeptide DDX39 GN=TGME49_216860	2	654.328	0.62435	0.0033208	53.448	1
918	GNYVSIHASGFR	12	Unmodified	_GNYVSIHASGFR_	TGME49_216860-t26_1-p1	DEAD (Asp-Glu-Ala-Asp) box polypeptide DDX39 GN=TGME49_216860	2	654.328	2.0054	1.8078e-07	97.779	1
919	GPGGVGKQLGPEHSQR	16	malon(K)	_GPGGVGK(ma)QLGPEHSQR_	TGME49_272290-t26_1-p1	pyruvate dehydrogenase complex subunit PD-HE1Beta GN=TGME49_272290	3	563.948	0.0546	1.0004e-06	61.657	1
920	GPGPQMGPPR	10	Unmodified	_GPGPQMGPPR_	TGME49_232130-t26_1-p1	Thioredoxin-like associated protein 2, putative(predict) GN=TGME49_232130	2	497.25	-1.294	0.0018108	73.233	1
921	GPIPTAPAPQIVVR	14	Unmodified	_GPIPTAPAPQIVVR_	TGME49_245470-t26_1-p1	mitotic checkpoint protein, BUB3 family protein GN=TGME49_245470	2	708.422	0.34571	0.023045	33.273	1
922	GPLVVYAEDNGVTR	14	Unmodified	_GPLVVYAEDNGVTR_	TGME49_309120-t26_1-p1	ribosomal protein RPL4 GN=TGME49_309120	2	745.386	0.11151	0.014615	35.657	1
923	GPSLEER	7	Unmodified	_GPSLEER_	TGME49_275440-t26_1-p1	dense granule protein GRA6 GN=TGME49_275440	2	394.201	0.3375	0.0013467	120.49	1
924	GPSLEER	7	Unmodified	_GPSLEER_	TGME49_275440-t26_1-p1	dense granule protein GRA6 GN=TGME49_275440	2	394.201	0.48689	0.0003966	124.59	1
925	GPSLFTEETMGPSK	14	Unmodified	_GPSLFTEETMGPSK_	TGME49_243730-t26_1-p1	rhoptry protein ROP9 GN=TGME49_243730	2	740.853	0.015072	3.0963e-08	80.632	1
926	GQAVELAVR	9	Unmodified	_GQAVELAVR_	TGME49_270510-t26_1-p1	asparaginyl-tRNA synthetase (NOB+tRNA synthase) GN=TGME49_270510	2	471.772	1.1549	0.0019829	83.948	1
927	GQAVELAVR	9	Unmodified	_GQAVELAVR_	TGME49_270510-t26_1-p1	asparaginyl-tRNA synthetase (NOB+tRNA synthase) GN=TGME49_270510	2	471.772	0.93848	0.0006575	95.358	1
928	GQDSPANVR	9	Unmodified	_GQDSPANVR_	TGME49_311470-t26_1-p1	rhoptry neck protein RON5 GN=TGME49_311470	2	472.233	-0.22465	0.0048012	74.92	1
929	GQDVPSLMK	9	Unmodified	_GQDVPSLMK_	TGME49_300140-t26_1-p1	elongation factor 1-gamma, putative GN=TGME49_300140	2	487.752	-3.2182	0.018539	53.751	1
930	GQPTGPAPPR	10	Unmodified	_GQPTGPAPPR_	TGME49_305850-t26_1-p1	RNA recognition motif-containing protein GN=TGME49_305850	2	489.262	-0.56889	0.0061721	59.067	1
931	GQQVISLGPSLK	12	Unmodified	_GQQVISLGPSLK_	TGME49_291960-t26_1-p1	rhoptry kinase family protein ROP40 (incomplete catalytic triad) GN=TGME49_291960	2	613.859	-0.11195	1.1342e-06	75.088	1
932	GQQVISLGPSLK	12	Unmodified	_GQQVISLGPSLK_	TGME49_291960-t26_1-p1	rhoptry kinase family protein ROP40 (incomplete catalytic triad) GN=TGME49_291960	2	613.859	0.23535	0.0050763	46.069	1
933	GQTPSQIGVTLR	12	Unmodified	_GQTPSQIGVTLR_	TGME49_270380-t26_1-p1	ribosomal protein RPS13 GN=TGME49_270380	2	628.852	0.31439	0.0031079	54.343	1
934	GQVVVIGATNR	11	Unmodified	_GQVVVIGATNR_	TGME49_273090-t26_1-p1	cell division protein CDC48CY GN=TGME49_273090	2	557.322	0.2925	0.012726	42.976	1
935	GQVVVIGATNR	11	Unmodified	_GQVVVIGATNR_	TGME49_273090-t26_1-p1	cell division protein CDC48CY GN=TGME49_273090	2	557.322	-0.6777	0.00017571	77.674	1
936	GRIVKASLHTQGDVEFLEGRLR	22	Unmodified	_GRIVKASLHTQGDVEFLEGRLR_	TGME49_297180-t26_1-p1	CRAL-TRIO domain-containing protein(predict) GN=TGME49_297180	5	497.08	-1.3995	0.00015436	32.833	1
937	GSALALDHIASVYR	14	Unmodified	_GSALALDHIASVYR_	TGME49_216590-t26_1-p1	HEAT repeat-containing protein GN=TGME49_216590	3	491.6	0.054628	0.012246	27.255	1
938	GSAVTGPVGK	10	Unmodified	_GSAVTGPVGK_	TGME49_312090-t26_1-p1	ribosomal protein RPL23 GN=TGME49_312090	2	436.745	0.17942	0.013678	47.334	1
939	GSDDAAEVSR	10	Unmodified	_GSDDAAEVSR_	TGME49_295110-t26_1-p1	rhoptry protein ROP7 GN=TGME49_295110	2	503.725	-0.035406	2.7394e-08	124.33	1
940	GSDDAAEVSR	10	Unmodified	_GSDDAAEVSR_	TGME49_295110-t26_1-p1	rhoptry protein ROP7 GN=TGME49_295110	2	503.725	0.61984	1.3832e-17	144.77	1
941	GSGWGGNWGPGGYGGR	16	Unmodified	_GSGWGGNWGPGGYGGR_	TGME49_264610-t26_1-p1	RNA recognition motif-containing protein GN=TGME49_264610	2	761.335	-0.73587	1.932e-06	65.374	1
942	GSGWGGNWGPGGYGGR	16	Unmodified	_GSGWGGNWGPGGYGGR_	TGME49_264610-t26_1-p1	RNA recognition motif-containing protein GN=TGME49_264610	2	761.335	-0.3286	1.05e-06	66.246	1
943	GSISQPGENSPFR	13	Unmodified	_GSISQPGENSPFR_	TGME49_217460-t26_1-p1	glutaminyl-tRNA synthetase (GlnRS) GN=TGME49_217460	2	688.334	0.41541	0.0088866	35.118	1
944	GSKMEELVHNIR	12	malon(K)	_GSK(ma)MEELVHNIR_	TGME49_205470-t26_1-p1	translation elongation factor 2 family protein, putative GN=TGME49_205470	3	500.249	0.21481	0.00078761	48.568	1
945	GSLVWQGAR	9	Unmodified	_GSLVWQGAR_	TGME49_219280-t26_1-p1	actin like protein ALP1 GN=TGME49_219280	2	487.264	0.042875	0.0039453	77.732	1
946	GSRPGKPVQLTEAEIR	16	Unmodified	_GSRPGKPVQLTEAEIR_	TGME49_310700-t26_1-p1	serine/threonine phosophatase PP1 GN=TGME49_310700	4	435.246	1.7427	0.0011277	36.597	1
947	GSSTSVCGCPK	11	Unmodified	_GSSTSVCGCPK_	TGME49_226960-t26_1-p1	phosphofructokinase PFKII GN=TGME49_226960	2	570.245	0.20682	0.025359	36.32	1
948	GTADGAGVADETHQGPRPPLR	21	Unmodified	_GTADGAGVADETHQGPRPPLR_	TGME49_308090-t26_1-p1	rhoptry protein ROP5 GN=TGME49_308090	3	701.351	0.57069	2.5086e-13	73.057	1
949	GTADGAGVADETHQGPRPPLR	21	Unmodified	_GTADGAGVADETHQGPRPPLR_	TGME49_308090-t26_1-p1	rhoptry protein ROP5 GN=TGME49_308090	4	526.265	0.90935	2.1771e-07	52.866	1
950	GTADGAGVADETHQGPRPPLR	21	Unmodified	_GTADGAGVADETHQGPRPPLR_	TGME49_308090-t26_1-p1	rhoptry protein ROP5 GN=TGME49_308090	3	701.351	0.53296	1.2647e-13	75.533	1
951	GTALTELLK	9	Unmodified	_GTALTELLK_	TGME49_204400-t26_1-p1	ATPase synthase subunit alpha, putative GN=TGME49_204400	2	473.284	-1.2543	0.0087354	64.841	1
952	GTALTELLK	9	Unmodified	_GTALTELLK_	TGME49_204400-t26_1-p1	ATPase synthase subunit alpha, putative GN=TGME49_204400	2	473.284	-1.2641	0.01077	61.78	1
953	GTCHSIAIDK	10	Unmodified	_GTCHSIAIDK_	TGME49_310030-t26_1-p1	cyclase-associated protein, putative GN=TGME49_310030	2	551.271	-0.29354	0.0079415	55.718	1
954	GTDDHLTTSMDK	12	Unmodified	_GTDDHLTTSMDK_	TGME49_203310-t26_1-p1	dense granule protein GRA7 GN=TGME49_203310	3	440.863	-0.18524	8.1763e-08	96.067	1
955	GTDDHLTTSMDK	12	Unmodified	_GTDDHLTTSMDK_	TGME49_203310-t26_1-p1	dense granule protein GRA7 GN=TGME49_203310	3	440.863	-0.379	3.1458e-10	103.43	1
956	GTDDHLTTSMDK	12	Unmodified	_GTDDHLTTSMDK_	TGME49_203310-t26_1-p1	dense granule protein GRA7 GN=TGME49_203310	2	660.79	0.96617	1.8568e-09	99.732	1
957	GTDMCHIPVK	10	Unmodified	_GTDMCHIPVK_	TGME49_297060-t26_1-p1	phosphoglycerate mutase PGMII GN=TGME49_297060	3	386.52	-0.81643	0.0031911	47.706	1
958	GTDMCHIPVK	10	Unmodified	_GTDMCHIPVK_	TGME49_297060-t26_1-p1	phosphoglycerate mutase PGMII GN=TGME49_297060	3	386.52	-0.70812	0.0026104	51.276	1
959	GTHIVGAPTTK	11	Unmodified	_GTHIVGAPTTK_	TGME49_305520-t26_1-p1	ribosomal protein RPS2 GN=TGME49_305520	3	361.205	-0.060022	0.0032739	42.425	1
960	GTHIVGAPTTK	11	Unmodified	_GTHIVGAPTTK_	TGME49_305520-t26_1-p1	ribosomal protein RPS2 GN=TGME49_305520	2	541.304	-0.081742	5.3053e-06	92.19	1
961	GTLLSIGR	8	Unmodified	_GTLLSIGR_	TGME49_313080-t26_1-p1	Putative transmembrane protein(predict) GN=TGME49_313080	2	408.751	-0.61656	0.0041047	73.208	1
962	GTLLSIGR	8	Unmodified	_GTLLSIGR_	TGME49_313080-t26_1-p1	Putative transmembrane protein(predict) GN=TGME49_313080	2	408.751	-0.3017	0.010241	66.351	1
963	GTPDGFR	7	Unmodified	_GTPDGFR_	TGME49_232250-t26_1-p1	catalase GN=TGME49_232250	2	375.182	0.045026	0.021252	74.415	1
964	GTSASVSIDDIAK	13	Unmodified	_GTSASVSIDDIAK_	TGME49_280380-t26_1-p1	poly(ADP-ribose) glycohydrolase GN=TGME49_280380	2	632.325	1.6923	0.012205	39.82	1
965	GTVAALATEEK	11	Unmodified	_GTVAALATEEK_	TGME49_300260-t26_1-p1	threonyl-tRNA synthetase family protein GN=TGME49_300260	2	545.293	1.0884	0.00034257	67.252	1
966	GVAMNPVEHPHGGGNHQHIGHPSTVSR	27	Unmodified	_GVAMNPVEHPHGGGNHQHIGHPSTVSR_	TGME49_204020-t26_1-p1	ribosomal protein RPL8 GN=TGME49_204020	4	703.092	-0.35235	0.00705	29.492	1
967	GVAMNPVEHPHGGGNHQHIGHPSTVSR	27	Unmodified	_GVAMNPVEHPHGGGNHQHIGHPSTVSR_	TGME49_204020-t26_1-p1	ribosomal protein RPL8 GN=TGME49_204020	5	562.675	0.23825	0.012914	19.655	1
968	GVAMNPVEHPHGGGNHQHIGHPSTVSR	27	Unmodified	_GVAMNPVEHPHGGGNHQHIGHPSTVSR_	TGME49_204020-t26_1-p1	ribosomal protein RPL8 GN=TGME49_204020	5	562.675	-0.51353	8.371e-06	39.795	1
969	GVAMNPVEHPHGGGNHQHIGHPSTVSR	27	Unmodified	_GVAMNPVEHPHGGGNHQHIGHPSTVSR_	TGME49_204020-t26_1-p1	ribosomal protein RPL8 GN=TGME49_204020	4	703.092	0.24735	0.0093165	27.753	1
970	GVDEQGNKIK	10	malon(K)	_GVDEQGNK(ma)IK_	TGME49_318230-t26_1-p1	phosphoglycerate kinase PGKI GN=TGME49_318230	2	587.291	-0.49601	0.00018055	96.229	1
971	GVDEQGNKIK	10	malon(K)	_GVDEQGNK(ma)IK_	TGME49_318230-t26_1-p1	phosphoglycerate kinase PGKI GN=TGME49_318230	2	587.291	0.074489	1.6157e-07	122.69	1
972	GVECGEELGGEKK	13	malon(K)	_GVECGEELGGEK(ma)K_	TGME49_269650-t26_1-p1	FFD and TFG box motifs protein GN=TGME49_269650	2	739.327	-0.1568	0.0069458	42.314	1
973	GVEDVVVGR	9	Unmodified	_GVEDVVVGR_	TGME49_216860-t26_1-p1	DEAD (Asp-Glu-Ala-Asp) box polypeptide DDX39 GN=TGME49_216860	2	465.256	-0.14752	0.0099083	63.076	1
974	GVGIQIESK	9	Unmodified	_GVGIQIESK_	TGME49_310030-t26_1-p1	cyclase-associated protein, putative GN=TGME49_310030	2	465.766	0.61536	0.01118	61.161	1
975	GVGTVLFSTPEGAQR	15	Unmodified	_GVGTVLFSTPEGAQR_	TGME49_262620-t26_1-p1	RNA recognition motif-containing protein GN=TGME49_262620	2	759.899	0.038085	0.00081075	48.351	1
976	GVLFYGPPGCGK	12	Unmodified	_GVLFYGPPGCGK_	TGME49_273090-t26_1-p1	cell division protein CDC48CY GN=TGME49_273090	2	626.313	-1.1225	0.016587	38.875	1
977	GVLGVTSGPK	10	Unmodified	_GVLGVTSGPK_	TGME49_208030-t26_1-p1	microneme protein MIC4 GN=TGME49_208030	2	457.769	0.40431	2.3516e-05	98.048	1
978	GVLGVTSGPK	10	Unmodified	_GVLGVTSGPK_	TGME49_208030-t26_1-p1	microneme protein MIC4 GN=TGME49_208030	2	457.769	0.21715	0.00052316	85.533	1
979	GVLLYGPPGSGK	12	Unmodified	_GVLLYGPPGSGK_	TGME49_273090-t26_1-p1	cell division protein CDC48CY GN=TGME49_273090	2	572.822	-1.004	0.0042724	49.448	1
980	GVPALITHDGR	11	Unmodified	_GVPALITHDGR_	TGME49_207440-t26_1-p1	ribosomal protein RPS4 GN=TGME49_207440	2	568.315	1.1922	0.0097518	44.543	1
981	GVPASSQGILR	11	Unmodified	_GVPASSQGILR_	TGME49_211040-t26_1-p1	Sec61beta family protein GN=TGME49_211040	2	542.809	-0.078723	0.02512	36.447	1
982	GVSDLAQHFLVK	12	Unmodified	_GVSDLAQHFLVK_	TGME49_205440-t26_1-p1	CCT chaperonin gamma subunit GN=TGME49_205440	3	438.579	0.087938	0.0317	21.039	1
983	GVSDLAQHFLVK	12	Unmodified	_GVSDLAQHFLVK_	TGME49_205440-t26_1-p1	CCT chaperonin gamma subunit GN=TGME49_205440	3	438.579	0.0042468	0.0002431	63.32	1
984	GVSEETTTGVHR	12	Unmodified	_GVSEETTTGVHR_	TGME49_225050-t26_1-p1	adenosylhomocysteinase, putative GN=TGME49_225050	2	636.813	0.13415	0.023949	34.75	1
985	GVVDSDDLPLNVSR	14	Unmodified	_GVVDSDDLPLNVSR_	TGME49_244560-t26_1-p1	heat shock protein 90, putative GN=TGME49_244560	2	743.381	-0.65441	2.2831e-10	93.478	1
986	GVVDSDDLPLNVSR	14	Unmodified	_GVVDSDDLPLNVSR_	TGME49_244560-t26_1-p1	heat shock protein 90, putative GN=TGME49_244560	2	743.381	-1.7763	3.0147e-14	104.55	1
987	GVVDSEDLPLNISR	14	Unmodified	_GVVDSEDLPLNISR_	TGME49_288380-t26_1-p1	heat shock protein HSP90 GN=TGME49_288380	2	757.396	-0.42303	0.0057864	42.682	1
988	GWGSCLNR	8	Unmodified	_GWGSCLNR_	TGME49_312090-t26_1-p1	ribosomal protein RPL23 GN=TGME49_312090	2	475.219	-0.22581	0.014692	69.984	1
989	GYFFTGDGVFR	11	Unmodified	_GYFFTGDGVFR_	TGME49_266640-t26_1-p1	Acetyl-coenzyme A synthetase 2, putative GN=TGME49_266640	2	633.301	0.77216	0.0074694	46.352	1
990	GYFFTGDGVFR	11	Unmodified	_GYFFTGDGVFR_	TGME49_266640-t26_1-p1	Acetyl-coenzyme A synthetase 2, putative GN=TGME49_266640	2	633.301	0.41635	0.020511	38.875	1
991	GYGFIEYATADAAK	14	Unmodified	_GYGFIEYATADAAK_	TGME49_202770-t26_1-p1	RNA recognition motif-containing protein GN=TGME49_202770	2	738.854	0.33918	0.017563	34.432	1
992	GYGFTTSAEK	10	Unmodified	_GYGFTTSAEK_	TGME49_209030-t26_1-p1	actin ACT1 GN=TGME49_209030	2	530.751	0.032083	0.0037289	64.103	1
993	GYGFTTSAEK	10	Unmodified	_GYGFTTSAEK_	TGME49_209030-t26_1-p1	actin ACT1 GN=TGME49_209030	2	530.751	-0.063189	0.0017933	73.499	1
994	GYGFVHYENEESAR	14	Unmodified	_GYGFVHYENEESAR_	TGME49_224850-t26_1-p1	polyadenylate binding protein, putative GN=TGME49_224850	3	553.246	1.2542	0.0026738	38.337	1
995	GYGFVHYENEESAR	14	Unmodified	_GYGFVHYENEESAR_	TGME49_224850-t26_1-p1	polyadenylate binding protein, putative GN=TGME49_224850	3	553.246	0.41182	0.012017	27.458	1
996	GYIGDFEIVDDHR	13	Unmodified	_GYIGDFEIVDDHR_	TGME49_234450-t26_1-p1	ribosomal protein RPS15A GN=TGME49_234450	3	512.576	0.18658	0.00010379	61.11	1
997	GYISPYFITNSK	12	Unmodified	_GYISPYFITNSK_	TGME49_247550-t26_1-p1	heat shock protein HSP60 GN=TGME49_247550	2	695.356	0.71361	0.0042724	49.448	1
998	GYSSDAVR	8	Unmodified	_GYSSDAVR_	TGME49_204050-t26_1-p1	subtilisin SUB1 GN=TGME49_204050	2	427.704	0.542	0.0046486	83.206	1
999	GYVASDSK	8	Unmodified	_GYVASDSK_	TGME49_294800-t26_1-p1	elongation factor 1-alpha (EF-1-ALPHA), putative GN=TGME49_294800	2	413.701	0.29787	0.0038605	84.498	1
1000	GYVASDSKNDPAK	13	malon(K)	_GYVASDSK(ma)NDPAK_	TGME49_294800-t26_1-p1	elongation factor 1-alpha (EF-1-ALPHA), putative GN=TGME49_294800	2	719.328	0.13674	0.0015314	62.861	1
1001	GYVASDSKNDPAK	13	malon(K)	_GYVASDSK(ma)NDPAK_	TGME49_294800-t26_1-p1	elongation factor 1-alpha (EF-1-ALPHA), putative GN=TGME49_294800	2	719.328	0.29952	0.00033812	66.387	1
1002	HAFEIIHLMTDK	12	Unmodified	_HAFEIIHLMTDK_	TGME49_242330-t26_1-p1	ribosomal protein RPS5 GN=TGME49_242330	3	485.587	1.6881	0.00063351	56.205	1
1003	HAFEIIHLMTDK	12	Unmodified	_HAFEIIHLMTDK_	TGME49_242330-t26_1-p1	ribosomal protein RPS5 GN=TGME49_242330	3	485.587	0.62112	1.3436e-10	108.68	1
1004	HAHNLSSNVGEFQR	14	Unmodified	_HAHNLSSNVGEFQR_	TGME49_215220-t26_1-p1	hypothetical protein GN=TGME49_215220	3	532.594	-0.040133	2.5889e-24	137.62	1
1005	HAHNLSSNVGEFQR	14	Unmodified	_HAHNLSSNVGEFQR_	TGME49_215220-t26_1-p1	hypothetical protein GN=TGME49_215220	4	399.697	0.41477	0.00022166	58.32	1
1006	HALMNLHSR	9	Unmodified	_HALMNLHSR_	TGME49_290660-t26_1-p1	RNA recognition motif-containing protein GN=TGME49_290660	3	360.191	0.27645	0.0023333	63.216	1
1007	HALMNLHSR	9	Unmodified	_HALMNLHSR_	TGME49_290660-t26_1-p1	RNA recognition motif-containing protein GN=TGME49_290660	3	360.191	-0.56757	0.0042897	54.066	1
1008	HAMAQIPANR	10	Unmodified	_HAMAQIPANR_	TGME49_217740-t26_1-p1	3-ketoacyl-(acyl-carrier-protein) reductase GN=TGME49_217740	2	554.788	-0.5401	6.2478e-05	92.838	1
1009	HAVACLGHFAQNR	13	Unmodified	_HAVACLGHFAQNR_	TGME49_216590-t26_1-p1	HEAT repeat-containing protein GN=TGME49_216590	3	494.246	-0.49079	1.3588e-10	91.313	1
1010	HAVSEGTKAVTK	12	malon(K)	_HAVSEGTK(ma)AVTK_	TGME49_251870-t26_1-p1	histone H2Bb GN=TGME49_251870	3	438.561	0.47765	3.9605e-06	83.351	1
1011	HAVSEGTKAVTK	12	malon(K)	_HAVSEGTK(ma)AVTK_	TGME49_251870-t26_1-p1	histone H2Bb GN=TGME49_251870	3	438.561	-0.16754	7.537e-05	65.895	1
1012	HAVSEGTKAVTK	12	malon(K)	_HAVSEGTK(ma)AVTK_	TGME49_251870-t26_1-p1	histone H2Bb GN=TGME49_251870	2	657.338	0.21273	0.012206	56.872	1
1013	HAYIAGTLAER	11	Unmodified	_HAYIAGTLAER_	TGME49_235930-t26_1-p1	domain K- type RNA binding proteins family protein GN=TGME49_235930	3	401.216	-0.21043	0.0011091	56.404	1
1014	HAYIAGTLAER	11	Unmodified	_HAYIAGTLAER_	TGME49_235930-t26_1-p1	domain K- type RNA binding proteins family protein GN=TGME49_235930	2	601.32	1.9444	0.0052638	54.259	1
1015	HAYIAGTLAER	11	Unmodified	_HAYIAGTLAER_	TGME49_235930-t26_1-p1	domain K- type RNA binding proteins family protein GN=TGME49_235930	3	401.216	-0.4127	1.3556e-06	91.549	1
1016	HCGLPTTCVK	10	Unmodified	_HCGLPTTCVK_	TGME49_200250-t26_1-p1	microneme protein MIC17A GN=TGME49_200250	2	586.781	0.68742	0.010981	51.276	1
1017	HCILTPQEDLGTGK	14	Unmodified	_HCILTPQEDLGTGK_	TGME49_238050-t26_1-p1	nuclease and tudor domain-containing protein GN=TGME49_238050	3	523.596	0.036438	0.00015545	54.898	1
1018	HCNLVLTDVR	10	Unmodified	_HCNLVLTDVR_	TGME49_270830-t26_1-p1	small nuclear ribonucleoprotein GN=TGME49_270830	3	409.549	-0.25872	0.0073751	40.496	1
1019	HCNLVLTDVR	10	Unmodified	_HCNLVLTDVR_	TGME49_270830-t26_1-p1	small nuclear ribonucleoprotein GN=TGME49_270830	2	613.819	0.60816	0.014822	45.661	1
1020	HDGDTFSIK	9	Unmodified	_HDGDTFSIK_	TGME49_288500-t26_1-p1	FAD Malate-dehydrogenase (MDH-FAD) GN=TGME49_288500	2	510.243	0.84564	0.025251	49.472	1
1021	HDGDTFSIK	9	Unmodified	_HDGDTFSIK_	TGME49_288500-t26_1-p1	FAD Malate-dehydrogenase (MDH-FAD) GN=TGME49_288500	2	510.243	0.27554	0.0056158	72.243	1
1022	HDTIGQAQSGTGK	13	Unmodified	_HDTIGQAQSGTGK_	TGME49_250770-t26_1-p1	eukaryotic initiation factor-4A, putative GN=TGME49_250770	3	433.881	-0.63432	1.0422e-06	73.219	1
1023	HDTIGQAQSGTGK	13	Unmodified	_HDTIGQAQSGTGK_	TGME49_250770-t26_1-p1	eukaryotic initiation factor-4A, putative GN=TGME49_250770	2	650.318	0.92384	0.0011049	54.898	1
1024	HEGKNVCNEEK	11	malon(K)	_HEGK(ma)NVCNEEK_	TGME49_268950-t26_1-p1	La domain protein(predict) GN=TGME49_268950	3	477.205	-1.4039	0.0013198	46.206	1
1025	HEGKNVCNEEK	11	malon(K)	_HEGK(ma)NVCNEEK_	TGME49_268950-t26_1-p1	La domain protein(predict) GN=TGME49_268950	2	715.304	-0.79557	0.007769	64.104	1
1026	HEGKNVCNEEK	11	malon(K)	_HEGK(ma)NVCNEEK_	TGME49_268950-t26_1-p1	La domain protein(predict) GN=TGME49_268950	3	477.205	0.024035	0.0003432	63.212	1
1027	HEGKNVCNEEK	11	malon(K)	_HEGK(ma)NVCNEEK_	TGME49_268950-t26_1-p1	La domain protein(predict) GN=TGME49_268950	2	715.304	0.17451	3.2677e-05	89.911	1
1028	HELPASEVPLYYNR	14	Unmodified	_HELPASEVPLYYNR_	TGME49_320220-t26_1-p1	ubiquinol cytochrome c oxidoreductase, putative GN=TGME49_320220	3	563.286	-0.058885	0.0030898	36.944	1
1029	HEVVMVLR	8	Unmodified	_HEVVMVLR_	TGME49_313230-t26_1-p1	eukaryotic initiation factor-2, alpha subunit GN=TGME49_313230	2	491.779	-0.10588	0.0019281	93.374	1
1030	HFAGLPQPK	9	Unmodified	_HFAGLPQPK_	TGME49_236210-t26_1-p1	peptidase M16 family potein, putative GN=TGME49_236210	2	497.777	-0.066852	0.02436	50.04	1
1031	HFAPFGNVISCK	12	Unmodified	_HFAPFGNVISCK_	TGME49_240070-t26_1-p1	RNA recognition motif-containing protein GN=TGME49_240070	3	459.564		0.0067436	29.264	1
1032	HFASAFEK	8	Unmodified	_HFASAFEK_	TGME49_219310-t26_1-p1	DnaK family protein GN=TGME49_219310	2	468.732	0.10448	0.0030282	85.862	1
1033	HFDILPYPPLK	11	Unmodified	_HFDILPYPPLK_	TGME49_228190-t26_1-p1	eukaryotic initiation factor-3, subunit 5, putative GN=TGME49_228190	2	670.374	0.28695	0.0097518	44.543	1
1034	HFEEGLAGAR	10	Unmodified	_HFEEGLAGAR_	TGME49_273090-t26_1-p1	cell division protein CDC48CY GN=TGME49_273090	2	543.77	-0.16357	0.020723	43.77	1
1035	HFEEGLAGAR	10	Unmodified	_HFEEGLAGAR_	TGME49_273090-t26_1-p1	cell division protein CDC48CY GN=TGME49_273090	2	543.77	-0.41871	6.5032e-07	119.68	1
1036	HFGAAPGTPGSK	12	Unmodified	_HFGAAPGTPGSK_	TGME49_300000-t26_1-p1	ribosomal protein RPL18 GN=TGME49_300000	2	563.786	0.20637	0.00044125	65.842	1
1037	HFGAAPGTPGSK	12	Unmodified	_HFGAAPGTPGSK_	TGME49_300000-t26_1-p1	ribosomal protein RPL18 GN=TGME49_300000	3	376.193	-0.58907	1.749e-05	73.632	1
1038	HFGAAYK	7	Unmodified	_HFGAAYK_	TGME49_249180-t26_1-p1	bifunctional dihydrofolate reductase-thymidylate synthase GN=TGME49_249180	2	397.203	-1.6438	0.032655	69.432	1
1039	HFGAAYK	7	Unmodified	_HFGAAYK_	TGME49_249180-t26_1-p1	bifunctional dihydrofolate reductase-thymidylate synthase GN=TGME49_249180	2	397.203	1.2001	0.006217	86.121	1
1040	HFGSATHLSHQELYELR	17	Unmodified	_HFGSATHLSHQELYELR_	TGME49_249390-t26_1-p1	glutamate/leucine/phenylalanine/valine dehydrogenase family protein GN=TGME49_249390	4	507.004	-0.18637	3.3717e-16	96.773	1
1041	HFGSATHLSHQELYELR	17	Unmodified	_HFGSATHLSHQELYELR_	TGME49_249390-t26_1-p1	glutamate/leucine/phenylalanine/valine dehydrogenase family protein GN=TGME49_249390	4	507.004	-0.61836	8.4135e-48	157.58	1
1042	HFGVCGSVVR	10	Unmodified	_HFGVCGSVVR_	TGME49_305850-t26_1-p1	RNA recognition motif-containing protein GN=TGME49_305850	2	559.282	-0.90888	0.015236	41.704	1
1043	HFLYGTAK	8	Unmodified	_HFLYGTAK_	TGME49_222170-t26_1-p1	dense-granule antigen DG32 GN=TGME49_222170	2	468.751	0.82155	9.9235e-09	140.09	1
1044	HFLYGTAK	8	Unmodified	_HFLYGTAK_	TGME49_222170-t26_1-p1	dense-granule antigen DG32 GN=TGME49_222170	2	468.751	0.39141	3.4099e-14	153.04	1
1045	HFMSEVQNK	9	Unmodified	_HFMSEVQNK_	TGME49_279390-t26_1-p1	proliferation-associated protein 2G4, putative GN=TGME49_279390	2	560.266	-1.0118	0.014334	56.432	1
1046	HFMSEVQNK	9	Unmodified	_HFMSEVQNK_	TGME49_279390-t26_1-p1	proliferation-associated protein 2G4, putative GN=TGME49_279390	2	560.266	-0.88906	0.0048012	74.92	1
1047	HFPSVNWTTSFSK	13	Unmodified	_HFPSVNWTTSFSK_	TGME49_256970-t26_1-p1	vacuolar ATP synthase subunit A, putative GN=TGME49_256970	3	513.253	-0.13487	0.018189	24.929	1
1048	HGDEQVKIWR	10	malon(K)	_HGDEQVK(ma)IWR_	TGME49_297060-t26_1-p1	phosphoglycerate mutase PGMII GN=TGME49_297060	3	451.89	0.19328	0.001161	58.172	1
1049	HGEHFDVLDVR	11	Unmodified	_HGEHFDVLDVR_	TGME49_221470-t26_1-p1	hypothetical protein GN=TGME49_221470	3	441.886	-0.30676	5.2095e-05	74.962	1
1050	HGESTWNK	8	Unmodified	_HGESTWNK_	TGME49_297060-t26_1-p1	phosphoglycerate mutase PGMII GN=TGME49_297060	2	479.722	-0.222	0.0027861	101.25	1
1051	HGMPAVSR	8	Unmodified	_HGMPAVSR_	TGME49_245680-t26_1-p1	ribosomal protein RPL21 GN=TGME49_245680	2	427.719		0.027131	61.962	1
1052	HHDKGSGSMEIR	12	malon(K)	_HHDK(ma)GSGSMEIR_	TGME49_268690-t26_1-p1	Putative transmembrane protein(predict) GN=TGME49_268690	3	480.549	-0.22318	0.0008582	46.88	1
1053	HHLNLHQIATIAAR	14	Unmodified	_HHLNLHQIATIAAR_	TGME49_276170-t26_1-p1	phosphatidylinositol 3- and 4-kinase GN=TGME49_276170	4	399.479	-0.51926	0.00015342	61.11	1
1054	HHPAFNQIR	9	Unmodified	_HHPAFNQIR_	TGME49_295340-t26_1-p1	UV excision repair protein Rad23 protein GN=TGME49_295340	3	373.865	-0.76449	0.0062372	45.972	1
1055	HIELQQPDRPPYR	13	Unmodified	_HIELQQPDRPPYR_	TGME49_255260-t26_1-p1	apical membrane antigen AMA1 GN=TGME49_255260	4	412.969	-0.24534	9.0469e-11	89.301	1
1056	HIGKLSLQK	9	malon(K)	_HIGK(ma)LSLQK_	TGME49_217000-t26_1-p1	hypothetical protein GN=TGME49_217000	2	555.319	-0.50867	0.0036935	101.35	1
1057	HINQCAQNSGLPLTHEK	17	Unmodified	_HINQCAQNSGLPLTHEK_	TGME49_254120-t26_1-p1	autophagy-related protein 8 atg8, putative GN=TGME49_254120	3	649.655	0.80347	0.029884	18.935	1
1058	HINQCAQNSGLPLTHEK	17	Unmodified	_HINQCAQNSGLPLTHEK_	TGME49_254120-t26_1-p1	autophagy-related protein 8 atg8, putative GN=TGME49_254120	3	649.655	0.38441	0.00087959	39.91	1
1059	HIPKPVEVPMTHYR	14	Unmodified	_HIPKPVEVPMTHYR_	TGME49_231630-t26_1-p1	alveolin domain containing intermediate filament IMC4 GN=TGME49_231630	3	568.64	0.22853	2.2317e-10	96.866	1
1060	HIPKPVEVPMTHYR	14	Unmodified	_HIPKPVEVPMTHYR_	TGME49_231630-t26_1-p1	alveolin domain containing intermediate filament IMC4 GN=TGME49_231630	4	426.732	0.1063	4.6696e-11	89.747	1
1061	HIQLAVR	7	Unmodified	_HIQLAVR_	TGME49_261250-t26_1-p1	histone H2A1 GN=TGME49_261250	2	418.759	-0.04254	0.0071158	114.72	1
1062	HIQLAVR	7	Unmodified	_HIQLAVR_	TGME49_261250-t26_1-p1	histone H2A1 GN=TGME49_261250	2	418.759	0.81036	0.00019593	128.38	1
1063	HISASLEQGQK	11	Unmodified	_HISASLEQGQK_	TGME49_227970-t26_1-p1	histone family DNA-binding protein GN=TGME49_227970	2	599.315	0.30098	0.0076153	45.829	1
1064	HISASLEQGQK	11	Unmodified	_HISASLEQGQK_	TGME49_227970-t26_1-p1	histone family DNA-binding protein GN=TGME49_227970	3	399.879	1.4335	4.2307e-05	77.533	1
1065	HIVDIPSFMVR	11	Unmodified	_HIVDIPSFMVR_	TGME49_248480-t26_1-p1	ribosomal protein RPS9 GN=TGME49_248480	2	657.355	-0.47098	0.0097518	44.543	1
1066	HIVDIPSFMVR	11	Unmodified	_HIVDIPSFMVR_	TGME49_248480-t26_1-p1	ribosomal protein RPS9 GN=TGME49_248480	3	438.573	-0.42464	0.00032026	64.73	1
1067	HKEDYESLMRPDLHLETR	18	Unmodified	_HKEDYESLMRPDLHLETR_	TGME49_201680-t26_1-p1	eukaryotic initiation factor-3 subunit 10, putative GN=TGME49_201680	5	454.626	-0.083319	0.00027464	40.968	1
1068	HKELLAQGLSNLK	13	malon(K)	_HK(ma)ELLAQGLSNLK_	TGME49_294620-t26_1-p1	eukaryotic initiation factor-3, subunit 8, putative GN=TGME49_294620	3	512.951	0.66573	8.6545e-05	60.307	1
1069	HKIETDEQK	9	malon(K)	_HK(ma)IETDEQK_	TGME49_226960-t26_1-p1	phosphofructokinase PFKII GN=TGME49_226960	2	607.288	0.54485	0.0028903	88.338	1
1070	HLALASADHEPGR	13	Unmodified	_HLALASADHEPGR_	TGME49_278830-t26_1-p1	glucose-6-phosphate 1-dehydrogenase GN=TGME49_278830	3	458.569	0.13839	2.3326e-14	100.02	1
1071	HLCIQNKGATEK	12	malon(K)	_HLCIQNK(ma)GATEK_	TGME49_227000-t26_1-p1	hypothetical protein GN=TGME49_227000	3	495.577	-0.3174	0.0001862	63.16	1
1072	HLCIQNKGATEK	12	malon(K)	_HLCIQNK(ma)GATEK_	TGME49_227000-t26_1-p1	hypothetical protein GN=TGME49_227000	3	495.577	0.41249	2.1114e-05	67.234	1
1073	HLCIQNKGATEK	12	malon(K)	_HLCIQNK(ma)GATEK_	TGME49_227000-t26_1-p1	hypothetical protein GN=TGME49_227000	2	742.862	0.019172	8e-09	101.2	1
1075	HLFHPEQLISGK	12	Unmodified	_HLFHPEQLISGK_	TGME49_316400-t26_1-p1	alpha tubulin TUBA1 GN=TGME49_316400	3	469.258	0.045371	3.1426e-10	103.44	1
1076	HLFHPEQLISGK	12	Unmodified	_HLFHPEQLISGK_	TGME49_316400-t26_1-p1	alpha tubulin TUBA1 GN=TGME49_316400	2	703.383	-0.083845	7.1859e-05	73.881	1
1077	HLFHPEQLISGK	12	Unmodified	_HLFHPEQLISGK_	TGME49_316400-t26_1-p1	alpha tubulin TUBA1 GN=TGME49_316400	3	469.258	-0.17869	4.598e-06	84.169	1
1078	HLFHPEQLISGK	12	Unmodified	_HLFHPEQLISGK_	TGME49_316400-t26_1-p1	alpha tubulin TUBA1 GN=TGME49_316400	2	703.383	0.30454	4.724e-13	127.71	1
1079	HLFHPEQLISGK	12	Unmodified	_HLFHPEQLISGK_	TGME49_316400-t26_1-p1	alpha tubulin TUBA1 GN=TGME49_316400	3	469.258	-0.51986	3.5587e-08	98.105	1
1080	HLFLSSYHR	9	Unmodified	_HLFLSSYHR_	TGME49_245730-t26_1-p1	phosphatidylinositol-4-phosphate 5-Kinase GN=TGME49_245730	3	387.205	-0.62909	0.00034143	85.676	1
1081	HLGGFDIIHLR	11	Unmodified	_HLGGFDIIHLR_	TGME49_207440-t26_1-p1	ribosomal protein RPS4 GN=TGME49_207440	3	426.575	0.24685	3.0214e-08	115.78	1
1082	HLGGFDIIHLR	11	Unmodified	_HLGGFDIIHLR_	TGME49_207440-t26_1-p1	ribosomal protein RPS4 GN=TGME49_207440	3	426.575	0.3129	3.9811e-07	98.048	1
1083	HLGGFDIIHLR	11	Unmodified	_HLGGFDIIHLR_	TGME49_207440-t26_1-p1	ribosomal protein RPS4 GN=TGME49_207440	3	426.575	0.46602	4.7276e-05	76.228	1
1084	HLIASGQATWEDVKR	15	Unmodified	_HLIASGQATWEDVKR_	TGME49_289600-t26_1-p1	heat shock protein HSP29 GN=TGME49_289600	3	570.969	0.23859	8.8972e-08	74.789	1
1085	HLINADK	7	Unmodified	_HLINADK_	TGME49_239820-t26_1-p1	D-3-phosphoglycerate dehydrogenase GN=TGME49_239820	2	405.727	-0.038447	0.0048431	90.37	1
1086	HLINNPSPAHGYK	13	Unmodified	_HLINNPSPAHGYK_	TGME49_277270-t26_1-p1	NTPase II GN=TGME49_277270	3	483.253	-0.14347	1.2391e-06	72.29	1
1087	HLINNPSPAHGYK	13	Unmodified	_HLINNPSPAHGYK_	TGME49_277270-t26_1-p1	NTPase II GN=TGME49_277270	3	483.253	-0.71387	1.4948e-06	71.085	1
1088	HLINNPSPAHGYK	13	Unmodified	_HLINNPSPAHGYK_	TGME49_277270-t26_1-p1	NTPase II GN=TGME49_277270	3	483.253	-0.57247	0.000292	54.343	1
1089	HLINNPSPAHGYK	13	Unmodified	_HLINNPSPAHGYK_	TGME49_277270-t26_1-p1	NTPase II GN=TGME49_277270	2	724.376	-0.50766	0.0027022	47.712	1
1090	HLKEEVVIR	9	malon(K)	_HLK(ma)EEVVIR_	TGME49_267690-t26_1-p1	Putative transmembrane protein(predict) GN=TGME49_267690	3	403.559	0.44999	0.0011419	69.346	1
1091	HLNVLDTAIQTAR	13	Unmodified	_HLNVLDTAIQTAR_	TGME49_312630-t26_1-p1	anonymous antigen-1, putative GN=TGME49_312630	3	484.604	-0.23409	0.00029553	54.276	1
1092	HLPDFDKEYDAIR	13	Unmodified	_HLPDFDKEYDAIR_	TGME49_286630-t26_1-p1	redoxin domain-containing protein GN=TGME49_286630	3	540.267	0.37638	1.5114e-09	89.46	1
1093	HLPDFDKEYDAIR	13	Unmodified	_HLPDFDKEYDAIR_	TGME49_286630-t26_1-p1	redoxin domain-containing protein GN=TGME49_286630	3	540.267	-0.061816	0.0004941	64.104	1
1094	HLPVDIQK	8	Unmodified	_HLPVDIQK_	TGME49_284560-t26_1-p1	ribosomal protein RPL9 GN=TGME49_284560	2	475.277	0.3615	0.017731	66.546	1
1095	HLPVDIQK	8	Unmodified	_HLPVDIQK_	TGME49_284560-t26_1-p1	ribosomal protein RPL9 GN=TGME49_284560	2	475.277	0.25991	0.011936	73.208	1
1096	HLQALEAAESQR	12	Unmodified	_HLQALEAAESQR_	TGME49_207370-t26_1-p1	hypothetical protein GN=TGME49_207370	3	451.569	0.0016007	0.00078944	53.448	1
1097	HLTGEFEK	8	Unmodified	_HLTGEFEK_	TGME49_248340-t26_1-p1	GTP-binding nuclear protein ran/tc4 GN=TGME49_248340	2	480.743	-0.11077	3.6851e-13	146.81	1
1098	HLTGEFEK	8	Unmodified	_HLTGEFEK_	TGME49_248340-t26_1-p1	GTP-binding nuclear protein ran/tc4 GN=TGME49_248340	2	480.743	-0.042677	0.00011735	120.87	1
1099	HLTSILTR	8	Unmodified	_HLTSILTR_	TGME49_289380-t26_1-p1	Transmembrane protein(predict) GN=TGME49_289380	2	470.782	-1.4982	0.026659	57.59	1
1103	HLVDNNVSPATVQPAF	16	Unmodified	_HLVDNNVSPATVQPAF_	TGME49_235470-t26_1-p1	myosin A GN=TGME49_235470	2	854.936	0.36844	3.0515e-15	91.812	1
1104	HLVISSVK	8	Unmodified	_HLVISSVK_	TGME49_239100-t26_1-p1	ribosomal protein RPS7 GN=TGME49_239100	2	441.774	-0.28869	0.0052144	82.279	1
1105	HLVISSVK	8	Unmodified	_HLVISSVK_	TGME49_239100-t26_1-p1	ribosomal protein RPS7 GN=TGME49_239100	2	441.774	0.26903	0.00083817	116.73	1
1106	HLVISSVK	8	Unmodified	_HLVISSVK_	TGME49_239100-t26_1-p1	ribosomal protein RPS7 GN=TGME49_239100	2	441.774	0.4348	0.010221	75.213	1
1107	HLYYLGCIQAVR	12	Unmodified	_HLYYLGCIQAVR_	TGME49_292220-t26_1-p1	PCI domain-containing protein GN=TGME49_292220	3	498.262	-0.42606	2.273e-10	105.98	1
1108	HLYYLGCIQAVR	12	Unmodified	_HLYYLGCIQAVR_	TGME49_292220-t26_1-p1	PCI domain-containing protein GN=TGME49_292220	2	746.89	-1.6741	0.005009	46.352	1
1109	HMHAKGVVHRDLK	13	Unmodified	_HMHAKGVVHRDLK_	TGME49_237860-t26_1-p1	protein kinase domain-containing protein GN=TGME49_237860	4	382.714	1.6135	0.0016722	40.475	2
1110	HMHAKGVVHRDLK	13	Unmodified	_HMHAKGVVHRDLK_	TGME49_237860-t26_1-p1	protein kinase domain-containing protein GN=TGME49_237860	4	382.714	4.3229	0.0046071	32.933	1
1111	HMHAKGVVHRDLK	13	Unmodified	_HMHAKGVVHRDLK_	TGME49_237860-t26_1-p1	protein kinase domain-containing protein GN=TGME49_237860	4	382.714	1.6404	0.030254	15.545	1
1112	HMHAKGVVHRDLK	13	Unmodified	_HMHAKGVVHRDLK_	TGME49_237860-t26_1-p1	protein kinase domain-containing protein GN=TGME49_237860	4	382.714	1.0058	0.017485	21.55	2
1113	HMLLYGAPGTGK	12	Unmodified	_HMLLYGAPGTGK_	TGME49_234420-t26_1-p1	ATPase, AAA family protein GN=TGME49_234420	3	415.553	0.81457	0.0028171	41.684	1
1114	HMLPNGFFK	9	Unmodified	_HMLPNGFFK_	TGME49_267400-t26_1-p1	ribosomal protein RPL32 GN=TGME49_267400	2	545.779	-0.50362	0.00074884	101.72	1
1115	HMLPNGFFK	9	Unmodified	_HMLPNGFFK_	TGME49_267400-t26_1-p1	ribosomal protein RPL32 GN=TGME49_267400	2	545.779	0.0040748	0.00068946	103.83	1
1116	HMYHSMYMR	9	Unmodified	_HMYHSMYMR_	TGME49_289530-t26_1-p1	ribosomal protein RPL19 GN=TGME49_289530	3	419.177	-0.89782	0.0007353	80.438	1
1117	HMYHSMYMR	9	Unmodified	_HMYHSMYMR_	TGME49_289530-t26_1-p1	ribosomal protein RPL19 GN=TGME49_289530	3	419.177	-0.098104	0.0055745	48.794	1
1118	HNDLEDVGK	9	Unmodified	_HNDLEDVGK_	TGME49_219540-t26_1-p1	cytosolic tRNA-Ala synthetase GN=TGME49_219540	2	513.746	-0.95405	0.00027024	115.57	1
1119	HNHYATGSNR	10	Unmodified	_HNHYATGSNR_	TGME49_227600-t26_1-p1	ribosomal protein RPL34 GN=TGME49_227600	3	386.18	-0.098959	0.030042	25.474	1
1120	HNQHAVFEGFFR	12	Unmodified	_HNQHAVFEGFFR_	TGME49_208530-t26_1-p1	nicotinate phosphoribosyltransferase GN=TGME49_208530	3	496.909	-0.38548	0.00086728	52.071	1
1121	HPAPPPPPPPPPPPPR	16	Unmodified	_HPAPPPPPPPPPPPPR_	TGME49_207760-t26_1-p1	DnaJ C terminal region domain-containing protein GN=TGME49_207760	3	548.972	-0.14895	1.1057e-09	76.728	1
1122	HPAPPPPPPPPPPPPR	16	Unmodified	_HPAPPPPPPPPPPPPR_	TGME49_207760-t26_1-p1	DnaJ C terminal region domain-containing protein GN=TGME49_207760	4	411.981	0.18811	0.021561	21.886	1
1123	HPAPPPPPPPPPPPPR	16	Unmodified	_HPAPPPPPPPPPPPPR_	TGME49_207760-t26_1-p1	DnaJ C terminal region domain-containing protein GN=TGME49_207760	3	548.972	0.61127	4.9255e-13	83.53	1
1124	HPGHVGATHTYNWDEFR	17	Unmodified	_HPGHVGATHTYNWDEFR_	TGME49_312600-t26_1-p1	heat shock protein HSP21 GN=TGME49_312600	4	506.734	0.73986	1.3648e-27	129.01	1
1125	HPGHVGATHTYNWDEFR	17	Unmodified	_HPGHVGATHTYNWDEFR_	TGME49_312600-t26_1-p1	heat shock protein HSP21 GN=TGME49_312600	3	675.31	0.14566	1.6973e-05	54.281	1
1126	HPGHVGATHTYNWDEFR	17	Unmodified	_HPGHVGATHTYNWDEFR_	TGME49_312600-t26_1-p1	heat shock protein HSP21 GN=TGME49_312600	4	506.734	-0.25995	8.3068e-09	70.197	1
1127	HPGHVGATHTYNWDEFR	17	Unmodified	_HPGHVGATHTYNWDEFR_	TGME49_312600-t26_1-p1	heat shock protein HSP21 GN=TGME49_312600	3	675.31	-0.43306	1.4221e-09	74.428	1
1128	HPGHVGATHTYNWDEFR	17	Unmodified	_HPGHVGATHTYNWDEFR_	TGME49_312600-t26_1-p1	heat shock protein HSP21 GN=TGME49_312600	4	506.734	-0.091789	0.021077	26.362	1
1129	HPVLPLGISPDLSSHR	16	Unmodified	_HPVLPLGISPDLSSHR_	TGME49_272400-t26_1-p1	casein kinase ii regulatory subunit protein GN=TGME49_272400	3	575.653	0.15411	0.0089639	26.292	1
1130	HPVLPLGISPDLSSHR	16	Unmodified	_HPVLPLGISPDLSSHR_	TGME49_272400-t26_1-p1	casein kinase ii regulatory subunit protein GN=TGME49_272400	3	575.653	-0.64363	0.0089639	26.292	1
1131	HQALAIGLFQK	11	Unmodified	_HQALAIGLFQK_	TGME49_295110-t26_1-p1	rhoptry protein ROP7 GN=TGME49_295110	2	613.356	-0.53845	0.0003555	67.214	1
1132	HQALAIGLFQK	11	Unmodified	_HQALAIGLFQK_	TGME49_295110-t26_1-p1	rhoptry protein ROP7 GN=TGME49_295110	2	613.356	-1.334	0.00032201	68.536	1
1133	HSASYWLGR	9	Unmodified	_HSASYWLGR_	TGME49_300260-t26_1-p1	threonyl-tRNA synthetase family protein GN=TGME49_300260	2	538.767	0.59733	0.0032362	79.986	1
1134	HSDLSLCQHHFEALK	15	Unmodified	_HSDLSLCQHHFEALK_	TGME49_213940-t26_1-p1	CHCH domain-containing protein GN=TGME49_213940	4	456.223	2.1857	0.007447	34.851	1
1135	HSIHGETASTIR	12	Unmodified	_HSIHGETASTIR_	TGME49_265450-t26_1-p1	hexokinase GN=TGME49_265450	2	654.836	1.0625	0.0044818	48.568	1
1136	HSIHGETASTIR	12	Unmodified	_HSIHGETASTIR_	TGME49_265450-t26_1-p1	hexokinase GN=TGME49_265450	3	436.893	-0.12898	2.4469e-05	69.352	1
1137	HSISHGAQLAIPK	13	Unmodified	_HSISHGAQLAIPK_	TGME49_216260-t26_1-p1	eukaryotic initiation factor-2B, gamma subunit, putative GN=TGME49_216260	3	453.589	-1.174	0.01676	25.982	1
1138	HSPGFFGLR	9	Unmodified	_HSPGFFGLR_	TGME49_277760-t26_1-p1	adenylosuccinate lyase, putative GN=TGME49_277760	2	509.267	0.22928	0.0037011	78.516	1
1139	HSSESLFPR	9	Unmodified	_HSSESLFPR_	TGME49_279100-t26_1-p1	mitochondrial association factor 1(predict) GN=TGME49_279100	2	530.265	-0.079879	0.0027492	81.525	1
1140	HSSESLFPR	9	Unmodified	_HSSESLFPR_	TGME49_279100-t26_1-p1	mitochondrial association factor 1(predict) GN=TGME49_279100	2	530.265	0.78876	0.0013774	85.862	1
1141	HSSESLFPR	9	Unmodified	_HSSESLFPR_	TGME49_279100-t26_1-p1	mitochondrial association factor 1(predict) GN=TGME49_279100	3	353.845	-0.019895	2.4438e-06	122.19	1
1142	HTDNIHFKCSCDAEEK	16	malon(K)	_HTDNIHFK(ma)CSCDAEEK_	TGME49_216650-t26_1-p1	S15 sporozoite-expressed protein GN=TGME49_216650	3	692.951	-0.23758	2.1343e-13	85.737	1
1143	HTDNIHFKCSCDAEEK	16	malon(K)	_HTDNIHFK(ma)CSCDAEEK_	TGME49_216650-t26_1-p1	S15 sporozoite-expressed protein GN=TGME49_216650	3	692.951	-0.018835	0.00010185	45.844	1
1144	HTDTIELK	8	Unmodified	_HTDTIELK_	TGME49_316250-t26_1-p1	hypothetical protein GN=TGME49_316250	2	478.756	0.41265	0.00040576	119.21	1
1145	HTFEGCTRPVEVR	13	Unmodified	_HTFEGCTRPVEVR_	TGME49_321500-t26_1-p1	RNA recognition motif-containing protein GN=TGME49_321500	3	529.928	-1.4031	0.0080555	45.28	1
1146	HTGTGTAQLK	10	Unmodified	_HTGTGTAQLK_	TGME49_309120-t26_1-p1	ribosomal protein RPL4 GN=TGME49_309120	2	507.272	3.7098	5.6595e-12	134.84	1
1147	HTGTGTAQLK	10	Unmodified	_HTGTGTAQLK_	TGME49_309120-t26_1-p1	ribosomal protein RPL4 GN=TGME49_309120	2	507.272	1.3129	4.8284e-12	136.02	1
1148	HTIGVNYFGTK	11	Unmodified	_HTIGVNYFGTK_	TGME49_290890-t26_1-p1	carbonyl reductase 1, putative GN=TGME49_290890	3	412.884	0.81356	2.7929e-05	81.525	1
1149	HTLCLQNK	8	Unmodified	_HTLCLQNK_	TGME49_245460-t26_1-p1	ribosomal protein RPS8 GN=TGME49_245460	2	507.263	-0.61118	1.4319e-27	171.53	1
1150	HTLCLQNKHR	10	malon(K)	_HTLCLQNK(ma)HR_	TGME49_245460-t26_1-p1	ribosomal protein RPS8 GN=TGME49_245460	3	464.898	-0.77883	3.2748e-07	116.55	1
1151	HTLFPSHQ	8	Unmodified	_HTLFPSHQ_	TGME49_305290-t26_1-p1	vacuolar atp synthase subunit e, putative GN=TGME49_305290	2	483.743	1.1073	0.0013139	89.542	1
1154	HTLSWQTHR	9	Unmodified	_HTLSWQTHR_	TGME49_215590-t26_1-p1	flavoprotein subunit of succinate dehydrogenase GN=TGME49_215590	3	389.2	0.14645	0.00012743	109.29	1
1155	HTQAKLLHALGAAR	14	malon(K)	_HTQAK(ma)LLHALGAAR_	TGME49_244050-t26_1-p1	PPR repeat protein(predict) GN=TGME49_244050	3	524.958	-1.0275	1.5227e-07	76.341	1
1156	HTVLATGGYGR	11	Unmodified	_HTVLATGGYGR_	TGME49_215590-t26_1-p1	flavoprotein subunit of succinate dehydrogenase GN=TGME49_215590	3	377.868		0.017399	23.804	1
1157	HTWQDMER	8	Unmodified	_HTWQDMER_	TGME49_258660-t26_1-p1	rhoptry protein ROP6 GN=TGME49_258660	2	551.74	0.21004	0.028394	56.258	1
1158	HVDYAITSPFGGGR	14	Unmodified	_HVDYAITSPFGGGR_	TGME49_248480-t26_1-p1	ribosomal protein RPS9 GN=TGME49_248480	3	492.913	0.22644	3.5911e-06	66.989	1
1159	HVEQQVSMMHTTLK	14	Unmodified	_HVEQQVSMMHTTLK_	TGME49_246130-t26_1-p1	serpin (serine proteinase inhibitor) superfamily protein GN=TGME49_246130	3	556.945	-0.57232	0.0022527	39.746	1
1160	HVIEFIKTK	9	malon(K)	_HVIEFIK(ma)TK_	TGME49_208390-t26_1-p1	Capping protein alpha-like subunit, putative(predict) GN=TGME49_208390	3	400.892	-0.077829	0.0051935	46.73	1
1161	HVNRPGGAKHAIISAPAK	18	malon(K)	_HVNRPGGAK(ma)HAIISAPAK_	TGME49_269190-t26_1-p1	glyceraldehyde-3-phosphate dehydrogenase GAPDH2 GN=TGME49_269190	4	478.264	1.0371	0.00045652	41.798	1
1162	HVPAAATTGLR	11	Unmodified	_HVPAAATTGLR_	TGME49_264660-t26_1-p1	SAG-related sequence SRS44 GN=TGME49_264660	2	547.309	0.48142	0.0070394	47.894	1
1163	HVPAAATTGLR	11	Unmodified	_HVPAAATTGLR_	TGME49_264660-t26_1-p1	SAG-related sequence SRS44 GN=TGME49_264660	3	365.209	-0.26068	0.0011091	56.404	1
1164	HVQLCVDENK	10	Unmodified	_HVQLCVDENK_	TGME49_201680-t26_1-p1	eukaryotic initiation factor-3 subunit 10, putative GN=TGME49_201680	2	621.301	0.86527	0.029458	40.994	1
1165	HVSGVFR	7	Unmodified	_HVSGVFR_	TGME49_309590-t26_1-p1	rhoptry protein ROP1 GN=TGME49_309590	2	401.222	0.21563	0.011238	108.98	1
1166	HVSGVFR	7	Unmodified	_HVSGVFR_	TGME49_309590-t26_1-p1	rhoptry protein ROP1 GN=TGME49_309590	2	401.222	0.73237	0.0090517	97.473	1
1167	HVSHFSPVQK	10	Unmodified	_HVSHFSPVQK_	TGME49_226410-t26_1-p1	EF-1 guanine nucleotide exchange domain-containing protein GN=TGME49_226410	3	389.209	0.21646	0.00012437	85.533	1
1168	HVSHFSPVQK	10	Unmodified	_HVSHFSPVQK_	TGME49_226410-t26_1-p1	EF-1 guanine nucleotide exchange domain-containing protein GN=TGME49_226410	3	389.209	0.20055	9.6322e-06	95.775	1
1169	HVSYELEDAEEEPAEK	16	Unmodified	_HVSYELEDAEEEPAEK_	TGME49_221670-t26_1-p1	transcriptional elongation factor FACT140 GN=TGME49_221670	3	625.615	1.7071	0.0033366	33.313	1
1170	HVVGWLR	7	Unmodified	_HVVGWLR_	TGME49_292080-t26_1-p1	leucyl-tRNA synthetase GN=TGME49_292080	2	433.753	-0.2792	0.0052995	91.14	1
1171	HVVGWLR	7	Unmodified	_HVVGWLR_	TGME49_292080-t26_1-p1	leucyl-tRNA synthetase GN=TGME49_292080	2	433.753	-0.59	0.012606	78.445	1
1172	HWNDTTSICR	10	Unmodified	_HWNDTTSICR_	TGME49_215980-t26_1-p1	Putative transmembrane protein(predict) GN=TGME49_215980	3	430.528	-0.35556	0.017671	31.758	1
1173	HWNDTTSICR	10	Unmodified	_HWNDTTSICR_	TGME49_215980-t26_1-p1	Putative transmembrane protein(predict) GN=TGME49_215980	2	645.288	0.55641	0.0013451	79.201	1
1174	HWNDTTSICR	10	Unmodified	_HWNDTTSICR_	TGME49_215980-t26_1-p1	Putative transmembrane protein(predict) GN=TGME49_215980	3	430.528	-1.2428	0.0029837	48.981	1
1175	HWNDTTSICR	10	Unmodified	_HWNDTTSICR_	TGME49_215980-t26_1-p1	Putative transmembrane protein(predict) GN=TGME49_215980	3	430.528	-0.56977	0.0034835	45.908	1
1176	HYEALGYYPNR	11	Unmodified	_HYEALGYYPNR_	TGME49_306670-t26_1-p1	NADH-ubiquinone reductase complex 1 MLRQ subunit(predict) GN=TGME49_306670	2	691.828	-0.15485	0.00010642	82.261	1
1177	HYFHVYVPDTLR	12	Unmodified	_HYFHVYVPDTLR_	TGME49_208390-t26_1-p1	Capping protein alpha-like subunit, putative(predict) GN=TGME49_208390	3	516.265	0.18323	0.0010439	48.948	1
1178	HYGALQGLNK	10	Unmodified	_HYGALQGLNK_	TGME49_297060-t26_1-p1	phosphoglycerate mutase PGMII GN=TGME49_297060	2	550.796	-0.12885	3.8341e-06	111.46	1
1179	HYGALQGLNK	10	Unmodified	_HYGALQGLNK_	TGME49_297060-t26_1-p1	phosphoglycerate mutase PGMII GN=TGME49_297060	2	550.796	0.17285	6.1373e-18	149.72	1
1180	HYGALQGLNK	10	Unmodified	_HYGALQGLNK_	TGME49_297060-t26_1-p1	phosphoglycerate mutase PGMII GN=TGME49_297060	3	367.533	-0.25132	0.0022497	53.493	1
1181	HYGALQGLNK	10	Unmodified	_HYGALQGLNK_	TGME49_297060-t26_1-p1	phosphoglycerate mutase PGMII GN=TGME49_297060	2	550.796	-1.0235	0.0018519	72.607	1
1182	HYGALQGLNKAETAAK	16	malon(K)	_HYGALQGLNK(ma)AETAAK_	TGME49_297060-t26_1-p1	phosphoglycerate mutase PGMII GN=TGME49_297060	3	586.632	1.0017	6.5422e-05	49.708	1
1183	HYGALQGLNKAETAAK	16	malon(K)	_HYGALQGLNK(ma)AETAAK_	TGME49_297060-t26_1-p1	phosphoglycerate mutase PGMII GN=TGME49_297060	3	586.632	0.8089	5.9581e-09	68.41	1
1184	HYGALQGLNKAETAAK	16	malon(K)	_HYGALQGLNK(ma)AETAAK_	TGME49_297060-t26_1-p1	phosphoglycerate mutase PGMII GN=TGME49_297060	2	879.444	0.37109	5.3655e-26	124.63	1
1185	HYGHVDCPGHADYVK	15	Unmodified	_HYGHVDCPGHADYVK_	TGME49_262380-t26_1-p1	elongation factor Tu, putative GN=TGME49_262380	4	439.448	-0.29564	4.0123e-09	80.746	1
1186	HYTEEEGIR	9	Unmodified	_HYTEEEGIR_	TGME49_291890-t26_1-p1	microneme protein MIC1 GN=TGME49_291890	2	567.265	-0.54187	0.0053145	73.233	1
1187	HYYLLDEAELK	11	Unmodified	_HYYLLDEAELK_	TGME49_297060-t26_1-p1	phosphoglycerate mutase PGMII GN=TGME49_297060	2	697.354	0.28284	3.3239e-07	108.35	1
1188	HYYTVFR	7	Unmodified	_HYYTVFR_	TGME49_246550-t26_1-p1	aspartyl protease ASP3 GN=TGME49_246550	2	493.248	0.61291	0.0098267	81.784	1
1189	HYYTVFR	7	Unmodified	_HYYTVFR_	TGME49_246550-t26_1-p1	aspartyl protease ASP3 GN=TGME49_246550	2	493.248	0.29439	0.029268	70.912	1
1190	IAAALSAACER	11	Unmodified	_IAAALSAACER_	TGME49_290040-t26_1-p1	macrophage migration inhibitory factor, putative GN=TGME49_290040	2	566.793	-0.1677	0.00018206	72.152	1
1191	IAAPHHWMLDK	11	Unmodified	_IAAPHHWMLDK_	TGME49_207440-t26_1-p1	ribosomal protein RPS4 GN=TGME49_207440	3	440.229	0.08084	0.00037801	64.121	1
1192	IACIGAWHPAR	11	Unmodified	_IACIGAWHPAR_	TGME49_227360-t26_1-p1	ribosomal protein RPL3 GN=TGME49_227360	3	417.885	-0.47791	0.00089247	58.699	1
1193	IACIGAWHPAR	11	Unmodified	_IACIGAWHPAR_	TGME49_227360-t26_1-p1	ribosomal protein RPL3 GN=TGME49_227360	2	626.324	-0.4262	0.0067361	48.981	1
1194	IACIGAWHPAR	11	Unmodified	_IACIGAWHPAR_	TGME49_227360-t26_1-p1	ribosomal protein RPL3 GN=TGME49_227360	3	417.885	-0.089479	4.3607e-05	77.192	1
1195	IACIGAWHPAR	11	Unmodified	_IACIGAWHPAR_	TGME49_227360-t26_1-p1	ribosomal protein RPL3 GN=TGME49_227360	2	626.324	0.13114	1.6747e-06	98.048	1
1196	IACYVTVR	8	Unmodified	_IACYVTVR_	TGME49_309820-t26_1-p1	ribosomal protein RPL11 GN=TGME49_309820	2	491.263	-0.70289	0.013232	71.692	1
1197	IADFSELYK	9	Unmodified	_IADFSELYK_	TGME49_294620-t26_1-p1	eukaryotic initiation factor-3, subunit 8, putative GN=TGME49_294620	2	543.279	0.23973	0.02552	49.3	1
1198	IAEIQAPAEIR	11	Unmodified	_IAEIQAPAEIR_	TGME49_232940-t26_1-p1	heat shock protein HSP20 GN=TGME49_232940	2	605.843	0.3751	0.00040929	67.08	1
1199	IAEIQAPAEIR	11	Unmodified	_IAEIQAPAEIR_	TGME49_232940-t26_1-p1	heat shock protein HSP20 GN=TGME49_232940	2	605.843	0.29816	0.003555	59.198	1
1200	IAESSLNELR	10	Unmodified	_IAESSLNELR_	TGME49_308860-t26_1-p1	hypothetical protein GN=TGME49_308860	2	566.304		0.013587	55.314	1
1201	IAGLEVLR	8	Unmodified	_IAGLEVLR_	TGME49_251780-t26_1-p1	heat shock protein GN=TGME49_251780	2	435.774	-0.53407	0.0051084	82.452	1
1202	IALTDQYLK	9	Unmodified	_IALTDQYLK_	TGME49_267060-t26_1-p1	ribosomal protein RPL14 GN=TGME49_267060	2	532.803	0.56965	0.018539	53.751	1
1203	IASMISGAAK	10	Unmodified	_IASMISGAAK_	TGME49_312630-t26_1-p1	anonymous antigen-1, putative GN=TGME49_312630	2	474.763	0.47434	0.0089396	54.259	1
1207	ICGVSIVR	8	Unmodified	_ICGVSIVR_	TGME49_312480-t26_1-p1	uracil phosphoribosyltransferase FUR1, putative GN=TGME49_312480	2	452.258	-0.49534	0.0046486	83.206	1
1208	ICHDILQLLTDK	12	Unmodified	_ICHDILQLLTDK_	TGME49_263090-t26_1-p1	14-3-3 protein GN=TGME49_263090	3	490.266	-0.44871	7.8929e-06	80.623	1
1209	ICHDILQLLTDK	12	Unmodified	_ICHDILQLLTDK_	TGME49_263090-t26_1-p1	14-3-3 protein GN=TGME49_263090	2	734.895	-0.50387	6.4801e-13	126.1	1
1210	IDAFADEETPESADGIR	17	Unmodified	_IDAFADEETPESADGIR_	TGME49_247470-t26_1-p1	nucleolar protein, putative GN=TGME49_247470	2	918.418	1.1239	0.028725	27.714	1
1211	IDAVAEEDDPDAGVR	15	Unmodified	_IDAVAEEDDPDAGVR_	TGME49_226830-t26_1-p1	DnaK family protein GN=TGME49_226830	2	786.363	1.1446	0.02395	31.614	1
1212	IDDVLSGVR	9	Unmodified	_IDDVLSGVR_	TGME49_205440-t26_1-p1	CCT chaperonin gamma subunit GN=TGME49_205440	2	487.269	-2.1892	0.020148	52.725	1
1213	IDEVPELPLVVSEK	14	Unmodified	_IDEVPELPLVVSEK_	TGME49_309120-t26_1-p1	ribosomal protein RPL4 GN=TGME49_309120	2	783.935	0.27621	0.023082	33.265	1
1214	IDFAGVPGFR	10	Unmodified	_IDFAGVPGFR_	TGME49_294200-t26_1-p1	glucose-6-phosphate 1-dehydrogenase GN=TGME49_294200	2	539.788	0.11701	0.011612	50.353	1
1215	IDFAGVPGFR	10	Unmodified	_IDFAGVPGFR_	TGME49_294200-t26_1-p1	glucose-6-phosphate 1-dehydrogenase GN=TGME49_294200	2	539.788	0.746	0.0055266	60.398	1
1216	IDGLSIDIDK	10	Unmodified	_IDGLSIDIDK_	TGME49_206470-t26_1-p1	pyruvate dehydrogenase complex subunit PDH-E3II GN=TGME49_206470	2	544.795	-1.1363	0.0055959	60.255	1
1217	IDHWSEGVR	9	Unmodified	_IDHWSEGVR_	TGME49_217820-t26_1-p1	PCI domain-containing protein GN=TGME49_217820	3	366.849	0.28903	0.0063939	48.423	1
1218	IDKPQAASEEELR	13	Unmodified	_IDKPQAASEEELR_	TGME49_215060-t26_1-p1	small GTP-binding protein sar1, putative GN=TGME49_215060	3	495.923	0.24246	1.5853e-05	69.92	1
1219	IDKPQAASEEELR	13	Unmodified	_IDKPQAASEEELR_	TGME49_215060-t26_1-p1	small GTP-binding protein sar1, putative GN=TGME49_215060	3	495.923	-0.52388	1.3293e-09	90.689	1
1220	IDSATMKQK	9	malon(K)	_IDSATMK(ma)QK_	TGME49_310030-t26_1-p1	cyclase-associated protein, putative GN=TGME49_310030	2	554.271	0.75154	0.016245	79.659	1
1221	IEADDIEAMYK	11	Unmodified	_IEADDIEAMYK_	TGME49_320050-t26_1-p1	ribosomal protein RPL5 GN=TGME49_320050	2	649.303	0.44193	0.00024358	73.435	1
1222	IEALTGKR	8	malon(K)	_IEALTGK(ma)R_	TGME49_288360-t26_1-p1	tryptophanyl-tRNA synthetase (TrpRS2) GN=TGME49_288360	2	487.269	-0.86719	0.021001	59.067	1
1223	IEALTGKR	8	malon(K)	_IEALTGK(ma)R_	TGME49_288360-t26_1-p1	tryptophanyl-tRNA synthetase (TrpRS2) GN=TGME49_288360	2	487.269	-0.59287	0.0067755	77.662	1
1224	IECTGQGAGARPPFFR	16	Unmodified	_IECTGQGAGARPPFFR_	TGME49_311470-t26_1-p1	rhoptry neck protein RON5 GN=TGME49_311470	3	588.626	-0.74154	0.022207	34.432	1
1225	IECTGQGAGARPPFFR	16	Unmodified	_IECTGQGAGARPPFFR_	TGME49_311470-t26_1-p1	rhoptry neck protein RON5 GN=TGME49_311470	3	588.626		0.0011672	32.702	1
1226	IEENCPFR	8	Unmodified	_IEENCPFR_	TGME49_288360-t26_1-p1	tryptophanyl-tRNA synthetase (TrpRS2) GN=TGME49_288360	2	532.745	-0.46783	0.0020633	109.01	1
1227	IEENCPFR	8	Unmodified	_IEENCPFR_	TGME49_288360-t26_1-p1	tryptophanyl-tRNA synthetase (TrpRS2) GN=TGME49_288360	2	532.745	-0.40852	0.00089987	116.37	1
1228	IEESLGSDCQYAGAGFR	17	Unmodified	_IEESLGSDCQYAGAGFR_	TGME49_268850-t26_1-p1	enolase 2 GN=TGME49_268850	2	930.415	-0.013142	1.3286e-15	92.38	1
1229	IEFDADAK	8	Unmodified	_IEFDADAK_	TGME49_244560-t26_1-p1	heat shock protein 90, putative GN=TGME49_244560	2	454.722	1.357	0.028394	56.258	1
1230	IEFDADAK	8	Unmodified	_IEFDADAK_	TGME49_244560-t26_1-p1	heat shock protein 90, putative GN=TGME49_244560	2	454.722	0.44958	0.016477	67.897	1
1231	IENTKIVVEK	10	malon(K)	_IENTK(ma)IVVEK_	TGME49_220400-t26_1-p1	actin depolymerizing factor ADF GN=TGME49_220400	2	629.848	0.28328	0.0079016	76.073	1
1232	IEQFCSNLLPSR	12	Unmodified	_IEQFCSNLLPSR_	TGME49_234450-t26_1-p1	ribosomal protein RPS15A GN=TGME49_234450	2	732.369	0.20552	0.0070832	44.511	1
1233	IETKENIIQRPK	12	malon(K)	_IETK(ma)ENIIQRPK_	TGME49_231640-t26_1-p1	alveolin domain containing intermediate filament IMC1 GN=TGME49_231640	2	777.928	0.62237	1.6817e-06	91.812	1
1234	IEVLCSKEFK	10	malon(K)	_IEVLCSK(ma)EFK_	TGME49_291680-t26_1-p1	Sec23/Sec24 trunk domain-containing protein GN=TGME49_291680	2	669.834	-0.23554	0.029646	59.227	1
1235	IFAASKPVIIDK	12	malon(K)	_IFAASK(ma)PVIIDK_	TGME49_234250-t26_1-p1	Putative neurofilament triplet protein M(predict) GN=TGME49_234250	2	694.395	0.6349	0.0099482	58.885	1
1236	IFAGVNAEK	9	Unmodified	_IFAGVNAEK_	TGME49_215590-t26_1-p1	flavoprotein subunit of succinate dehydrogenase GN=TGME49_215590	2	474.761	0.27591	0.024118	50.194	1
1237	IFGEAKAAPQAAAK	14	malon(K)	_IFGEAK(ma)AAPQAAAK_	TGME49_300140-t26_1-p1	elongation factor 1-gamma, putative GN=TGME49_300140	2	729.883	-0.14154	0.026529	42.947	1
1238	IFGEAKAAPQAAAK	14	malon(K)	_IFGEAK(ma)AAPQAAAK_	TGME49_300140-t26_1-p1	elongation factor 1-gamma, putative GN=TGME49_300140	2	729.883	-0.033953	0.030394	42.314	1
1239	IFSLFDDDR	9	Unmodified	_IFSLFDDDR_	TGME49_250340-t26_1-p1	centrin 2 GN=TGME49_250340	2	564.272	-0.19135	0.0071101	67.334	1
1240	IFTPLLHEIEEK	12	Unmodified	_IFTPLLHEIEEK_	TGME49_278830-t26_1-p1	glucose-6-phosphate 1-dehydrogenase GN=TGME49_278830	3	490.273	-0.76805	0.0006217	56.414	1
1241	IFVVDNDGLQR	11	Unmodified	_IFVVDNDGLQR_	TGME49_211030-t26_1-p1	hypothetical protein GN=TGME49_211030	2	638.338	1.2275	0.0055489	53.237	1
1242	IFVVDNDGLQR	11	Unmodified	_IFVVDNDGLQR_	TGME49_211030-t26_1-p1	hypothetical protein GN=TGME49_211030	2	638.338	0.21646	0.00030304	69.721	1
1243	IFVVDNDGLQR	11	Unmodified	_IFVVDNDGLQR_	TGME49_211030-t26_1-p1	hypothetical protein GN=TGME49_211030	2	638.338	-0.13732	0.022232	37.968	1
1244	IGELVGGSQR	10	Unmodified	_IGELVGGSQR_	TGME49_270510-t26_1-p1	asparaginyl-tRNA synthetase (NOB+tRNA synthase) GN=TGME49_270510	2	508.28	-0.16111	0.0089396	54.259	1
1245	IGELVGGSQR	10	Unmodified	_IGELVGGSQR_	TGME49_270510-t26_1-p1	asparaginyl-tRNA synthetase (NOB+tRNA synthase) GN=TGME49_270510	2	508.28	0.017293	0.00074012	83.862	1
1246	IGGIGTVPVGR	11	Unmodified	_IGGIGTVPVGR_	TGME49_294800-t26_1-p1	elongation factor 1-alpha (EF-1-ALPHA), putative GN=TGME49_294800	2	513.309	0.93446	2.8737e-06	96.113	1
1247	IGGIGTVPVGR	11	Unmodified	_IGGIGTVPVGR_	TGME49_294800-t26_1-p1	elongation factor 1-alpha (EF-1-ALPHA), putative GN=TGME49_294800	2	513.309	-0.40888	6.6312e-06	90.05	1
1248	IGGIGTVPVGR	11	Unmodified	_IGGIGTVPVGR_	TGME49_294800-t26_1-p1	elongation factor 1-alpha (EF-1-ALPHA), putative GN=TGME49_294800	2	513.309	0.28824	0.00017459	77.744	1
1249	IGIMPGYIHAK	11	Unmodified	_IGIMPGYIHAK_	TGME49_290600-t26_1-p1	succinyl-CoA-synthetase alpha SCSA GN=TGME49_290600	3	400.558	-0.32816	0.0096233	33.088	1
1250	IGLFGGAGVGK	11	Unmodified	_IGLFGGAGVGK_	TGME49_261950-t26_1-p1	ATP synthase beta subunit ATP-B GN=TGME49_261950	2	488.285	0.21204	0.024667	33.89	1
1251	IGSAGVVR	8	Unmodified	_IGSAGVVR_	TGME49_242330-t26_1-p1	ribosomal protein RPS5 GN=TGME49_242330	2	379.73	-0.33126	0.0097715	75.738	1
1252	IHGQGVAHFASGNR	14	Unmodified	_IHGQGVAHFASGNR_	TGME49_310440-t26_1-p1	membrane occupation and recognition nexus protein MORN1 GN=TGME49_310440	3	484.248	-0.51034	4.6261e-05	62.287	1
1253	IHHAVAYGGVPK	12	Unmodified	_IHHAVAYGGVPK_	TGME49_236650-t26_1-p1	DEAD (Asp-Glu-Ala-Asp) box polypeptide 17 GN=TGME49_236650	3	416.9	0.77396	0.0070172	33.87	1
1254	IIDLLGPANAQR	12	Unmodified	_IIDLLGPANAQR_	TGME49_238050-t26_1-p1	nuclease and tudor domain-containing protein GN=TGME49_238050	2	640.87	1.0792	0.0070294	44.543	1
1255	IIELLKIGTAATTK	14	malon(K)	_IIELLK(ma)IGTAATTK_	TGME49_238250-t26_1-p1	ribosomal protein RPL36 GN=TGME49_238250	2	779.459	-0.34591	0.0052065	52.172	1
1256	IIELLKIGTAATTK	14	malon(K)	_IIELLK(ma)IGTAATTK_	TGME49_238250-t26_1-p1	ribosomal protein RPL36 GN=TGME49_238250	2	779.459	0.11084	0.0096093	46.249	1
1257	IINEPTAAAIAYGLDK	16	Unmodified	_IINEPTAAAIAYGLDK_	TGME49_273760-t26_1-p1	heat shock protein HSP70 GN=TGME49_273760	2	830.451	0.37815	1.9757e-08	72.433	1
1258	IINEPTAAAIAYGLDK	16	Unmodified	_IINEPTAAAIAYGLDK_	TGME49_273760-t26_1-p1	heat shock protein HSP70 GN=TGME49_273760	3	553.97	0.18808	0.007092	28.627	1
1259	IINEPTAAAIAYGLDK	16	Unmodified	_IINEPTAAAIAYGLDK_	TGME49_273760-t26_1-p1	heat shock protein HSP70 GN=TGME49_273760	2	830.451	0.59701	7.6448e-06	59.728	1
1260	IINEPTAAAIAYGLDK	16	Unmodified	_IINEPTAAAIAYGLDK_	TGME49_273760-t26_1-p1	heat shock protein HSP70 GN=TGME49_273760	3	553.97	0.29126	0.0037013	32.858	1
1261	IINETKK	7	malon(K)	_IINETK(ma)K_	TGME49_314100-t26_1-p1	tetratricopeptide repeat-containing protein GN=TGME49_314100	2	466.258	1.1037	0.029535	68.224	1
1262	IIPQFMCQGGDFTR	14	Unmodified	_IIPQFMCQGGDFTR_	TGME49_205700-t26_1-p1	cyclophilin precursor GN=TGME49_205700	2	835.395	-0.11398	0.007974	40.941	1
1263	IIPSLNGK	8	Unmodified	_IIPSLNGK_	TGME49_289690-t26_1-p1	glyceraldehyde-3-phosphate dehydrogenase GAPDH1 GN=TGME49_289690	2	421.261	-2.3156	0.014089	70.69	1
1264	IIQVDQSLK	9	Unmodified	_IIQVDQSLK_	TGME49_269980-t26_1-p1	preprotein translocase Sec61, putative GN=TGME49_269980	2	522.308	1.2259	0.0087354	64.841	1
1265	IIQVDQSLK	9	Unmodified	_IIQVDQSLK_	TGME49_269980-t26_1-p1	preprotein translocase Sec61, putative GN=TGME49_269980	2	522.308	1.4478	0.00047643	90.15	1
1266	IIQVDQSLKEDR	12	Unmodified	_IIQVDQSLKEDR_	TGME49_269980-t26_1-p1	preprotein translocase Sec61, putative GN=TGME49_269980	3	481.932	-0.13549	0.0037905	60.157	1
1267	IISSVEQK	8	Unmodified	_IISSVEQK_	TGME49_263090-t26_1-p1	14-3-3 protein GN=TGME49_263090	2	452.261	0.13023	0.0024244	105.14	1
1268	IISSVEQKELSK	12	malon(K)	_IISSVEQK(ma)ELSK_	TGME49_263090-t26_1-p1	14-3-3 protein GN=TGME49_263090	2	723.888	0.19136	0.00038237	72.898	1
1269	IISSVEQKELSK	12	malon(K)	_IISSVEQK(ma)ELSK_	TGME49_263090-t26_1-p1	14-3-3 protein GN=TGME49_263090	3	482.928	-0.94399	0.00062207	52.527	1
1270	IKASPEAIAK	10	malon(K)	_IK(ma)ASPEAIAK_	TGME49_318230-t26_1-p1	phosphoglycerate kinase PGKI GN=TGME49_318230	2	557.311	0.44315	0.028305	59.796	1
1271	IKVVAPPER	9	malon(K)	_IK(ma)VVAPPER_	TGME49_209030-t26_1-p1	actin ACT1 GN=TGME49_209030	2	547.814	0.13341	0.027174	72.34	1
1272	ILAEGLQK	8	Unmodified	_ILAEGLQK_	TGME49_225050-t26_1-p1	adenosylhomocysteinase, putative GN=TGME49_225050	2	436.266	0.43972	0.0045832	83.313	1
1273	ILAEVSDCELGGR	13	Unmodified	_ILAEVSDCELGGR_	TGME49_219310-t26_1-p1	DnaK family protein GN=TGME49_219310	2	709.851	0.077951	0.00050291	60.157	1
1274	ILAEVSDCELGGR	13	Unmodified	_ILAEVSDCELGGR_	TGME49_219310-t26_1-p1	DnaK family protein GN=TGME49_219310	2	709.851	0.017448	0.00056759	59.227	1
1275	ILCMACMPGDGDPR	14	Unmodified	_ILCMACMPGDGDPR_	TGME49_319350-t26_1-p1	SAG-related sequence SRS17B GN=TGME49_319350	2	796.838	-0.80552	0.00089801	53.3	1
1276	ILDAAGSKGTGK	12	malon(K)	_ILDAAGSK(ma)GTGK_	TGME49_307850-t26_1-p1	6-phosphogluconate dehydrogenase GN=TGME49_307850	2	602.314	0.52745	0.023743	46.89	1
1277	ILEIYIEK	8	Unmodified	_ILEIYIEK_	TGME49_311240-t26_1-p1	DnaJ family chaperone, putative GN=TGME49_311240	2	510.802	0.61091	0.010471	74.92	1
1278	ILEIYIEK	8	Unmodified	_ILEIYIEK_	TGME49_311240-t26_1-p1	DnaJ family chaperone, putative GN=TGME49_311240	2	510.802	0.73773	0.0020433	87.476	1
1279	ILELSPGLR	9	Unmodified	_ILELSPGLR_	TGME49_219540-t26_1-p1	cytosolic tRNA-Ala synthetase GN=TGME49_219540	2	499.306	-1.7957	0.0053145	73.233	1
1280	ILELSPGLRPYGGK	14	Unmodified	_ILELSPGLRPYGGK_	TGME49_219540-t26_1-p1	cytosolic tRNA-Ala synthetase GN=TGME49_219540	3	500.624	0.42719	0.003005	50.088	1
1281	ILEPLVQER	9	Unmodified	_ILEPLVQER_	TGME49_231630-t26_1-p1	alveolin domain containing intermediate filament IMC4 GN=TGME49_231630	2	548.822	0.27888	0.0039665	77.662	1
1282	ILEPLVQER	9	Unmodified	_ILEPLVQER_	TGME49_231630-t26_1-p1	alveolin domain containing intermediate filament IMC4 GN=TGME49_231630	2	548.822	0.03047	0.00054424	88.495	1
1283	ILEQSMGPITVK	12	Unmodified	_ILEQSMGPITVK_	TGME49_321500-t26_1-p1	RNA recognition motif-containing protein GN=TGME49_321500	2	658.368	0.3441	0.0010754	63.091	1
1284	ILEQSMGPITVK	12	Unmodified	_ILEQSMGPITVK_	TGME49_321500-t26_1-p1	RNA recognition motif-containing protein GN=TGME49_321500	2	658.368	-0.15936	0.015144	39.73	1
1285	ILETLGCTAELER	13	Unmodified	_ILETLGCTAELER_	TGME49_309120-t26_1-p1	ribosomal protein RPL4 GN=TGME49_309120	2	752.887	-0.69411	0.00022836	64.104	1
1286	ILFLGLDNAGK	11	Unmodified	_ILFLGLDNAGK_	TGME49_215060-t26_1-p1	small GTP-binding protein sar1, putative GN=TGME49_215060	2	580.837	1.216	0.022232	37.968	1
1287	ILFLGLDNAGK	11	Unmodified	_ILFLGLDNAGK_	TGME49_215060-t26_1-p1	small GTP-binding protein sar1, putative GN=TGME49_215060	2	580.837	0.6917	0.0039646	58.172	1
1288	ILHCIMEHAFR	11	Unmodified	_ILHCIMEHAFR_	TGME49_256990-t26_1-p1	glycyl-tRNA synthetase GN=TGME49_256990	3	476.241	-0.746	3.4594e-05	79.659	1
1289	ILHCIMEHAFR	11	Unmodified	_ILHCIMEHAFR_	TGME49_256990-t26_1-p1	glycyl-tRNA synthetase GN=TGME49_256990	3	476.241	-0.90311	0.0015704	49.448	1
1290	ILMVGLDAAGK	11	Unmodified	_ILMVGLDAAGK_	TGME49_276140-t26_1-p1	ADP ribosylation factor ARF1 GN=TGME49_276140	2	544.313	0.4443	0.023728	37.18	1
1291	ILMVGLDAAGK	11	Unmodified	_ILMVGLDAAGK_	TGME49_276140-t26_1-p1	ADP ribosylation factor ARF1 GN=TGME49_276140	2	544.313	0.17658	0.02512	36.447	1
1292	ILMVGLDAAGK	11	Unmodified	_ILMVGLDAAGK_	TGME49_276140-t26_1-p1	ADP ribosylation factor ARF1 GN=TGME49_276140	2	544.313	0.2763	0.0031332	60.255	1
1293	ILNTNVDGR	9	Unmodified	_ILNTNVDGR_	TGME49_225080-t26_1-p1	ribosomal protein RPS18 GN=TGME49_225080	2	501.272	1.6661	0.0035011	79.148	1
1294	ILNTNVDGR	9	Unmodified	_ILNTNVDGR_	TGME49_225080-t26_1-p1	ribosomal protein RPS18 GN=TGME49_225080	2	501.272	2.4568	0.00075095	101.65	1
1295	ILNVISKK	8	malon(K)	_ILNVISK(ma)K_	TGME49_244560-t26_1-p1	heat shock protein 90, putative GN=TGME49_244560	2	500.805	0.16496	0.015839	65.278	1
1296	ILSGSFNPHVR	11	Unmodified	_ILSGSFNPHVR_	TGME49_263060-t26_1-p1	Proteasome/cyclosome repeat-containing protein GN=TGME49_263060	3	409.56	0.86935	0.0052851	37.968	1
1297	ILSVTVNNAR	10	Unmodified	_ILSVTVNNAR_	TGME49_283540-t26_1-p1	MIC20(predict) GN=TGME49_283540	2	543.817	0.70268	6.019e-06	107.79	1
1298	ILSVTVNNAR	10	Unmodified	_ILSVTVNNAR_	TGME49_283540-t26_1-p1	MIC20(predict) GN=TGME49_283540	2	543.817	0.27055	3.7764e-05	96.143	1
1299	ILTPMQGVEGGR	12	Unmodified	_ILTPMQGVEGGR_	TGME49_243710-t26_1-p1	t-complex protein beta subunit GN=TGME49_243710	2	629.335	-0.25534	0.027022	34.264	1
1300	ILVNQVEK	8	Unmodified	_ILVNQVEK_	TGME49_228170-t26_1-p1	inner membrane complex protein IMC2A GN=TGME49_228170	2	471.785	-0.2187	0.010366	75.043	1
1301	ILVNQVEK	8	Unmodified	_ILVNQVEK_	TGME49_228170-t26_1-p1	inner membrane complex protein IMC2A GN=TGME49_228170	2	471.785	0.21097	0.0013389	89.698	1
1302	ILYAFHPGGCHPER	14	Unmodified	_ILYAFHPGGCHPER_	TGME49_228170-t26_1-p1	inner membrane complex protein IMC2A GN=TGME49_228170	3	551.937	-0.21331	0.0085215	30.567	1
1303	ILYAFHPGGCHPER	14	Unmodified	_ILYAFHPGGCHPER_	TGME49_228170-t26_1-p1	inner membrane complex protein IMC2A GN=TGME49_228170	4	414.204	0.16007	0.0013461	45.614	1
1304	ILYAFHPGGCHPER	14	Unmodified	_ILYAFHPGGCHPER_	TGME49_228170-t26_1-p1	inner membrane complex protein IMC2A GN=TGME49_228170	3	551.937	0.26215	0.014645	25.122	1
1305	ILYAFHPGGCHPER	14	Unmodified	_ILYAFHPGGCHPER_	TGME49_228170-t26_1-p1	inner membrane complex protein IMC2A GN=TGME49_228170	4	414.204	0.32985	0.00072482	51.771	1
1306	ILYLHGLEGGR	11	Unmodified	_ILYLHGLEGGR_	TGME49_304500-t26_1-p1	Putative transmembrane protein(predict) GN=TGME49_304500	3	409.9	0.48583	0.0014299	51.567	1
1307	ILYLHGLEGGR	11	Unmodified	_ILYLHGLEGGR_	TGME49_304500-t26_1-p1	Putative transmembrane protein(predict) GN=TGME49_304500	2	614.346	-0.74462	0.014605	38.783	1
1308	ILYLHGLEGGR	11	Unmodified	_ILYLHGLEGGR_	TGME49_304500-t26_1-p1	Putative transmembrane protein(predict) GN=TGME49_304500	3	409.9	0.075462	5.2095e-05	74.962	1
1309	IMDIQPSELHQR	12	Unmodified	_IMDIQPSELHQR_	TGME49_247510-t26_1-p1	fructose-bisphospatase II GN=TGME49_247510	3	489.586	-0.24965	0.00017076	64.64	1
1310	IMDIQPSELHQR	12	Unmodified	_IMDIQPSELHQR_	TGME49_247510-t26_1-p1	fructose-bisphospatase II GN=TGME49_247510	3	489.586	-0.053506	0.00020892	63.944	1
1311	IMDIQPSELHQR	12	Unmodified	_IMDIQPSELHQR_	TGME49_247510-t26_1-p1	fructose-bisphospatase II GN=TGME49_247510	2	733.875	0.40514	0.020732	36.417	1
1312	IMGQVGEAIK	10	Unmodified	_IMGQVGEAIK_	TGME49_318430-t26_1-p1	malate dehydrogenase MDH GN=TGME49_318430	2	523.289	-0.15923	0.0085807	54.784	1
1313	IMIGASTETEQKEK	14	malon(K)	_IMIGASTETEQK(ma)EK_	TGME49_240600-t26_1-p1	chaperonin cpn60, putative GN=TGME49_240600	2	825.898	0.18466	0.0005442	64.454	1
1314	IMNVIGEPVDECGPVPAK	18	Unmodified	_IMNVIGEPVDECGPVPAK_	TGME49_261950-t26_1-p1	ATP synthase beta subunit ATP-B GN=TGME49_261950	2	962.979	0.44383	0.029727	26.412	1
1315	IMVATDLFGR	10	Unmodified	_IMVATDLFGR_	TGME49_216860-t26_1-p1	DEAD (Asp-Glu-Ala-Asp) box polypeptide DDX39 GN=TGME49_216860	2	561.802	0.09353	0.0017052	74.841	1
1316	IMVATDLFGR	10	Unmodified	_IMVATDLFGR_	TGME49_216860-t26_1-p1	DEAD (Asp-Glu-Ala-Asp) box polypeptide DDX39 GN=TGME49_216860	2	561.802	-0.14243	0.0016142	76.228	1
1317	INVFYNEATGGR	12	Unmodified	_INVFYNEATGGR_	TGME49_266960-t26_1-p1	beta tubulin GN=TGME49_266960	2	670.833	0.6333	0.0057865	45.28	1
1318	INVFYNEATGGR	12	Unmodified	_INVFYNEATGGR_	TGME49_266960-t26_1-p1	beta tubulin GN=TGME49_266960	2	670.833	0.6364	0.0045511	48.277	1
1319	INWVVPR	7	Unmodified	_INWVVPR_	TGME49_229920-t26_1-p1	Putative transmembrane protein(predict) GN=TGME49_229920	2	442.261		0.0080398	78.616	1
1320	IPGFYAR	7	Unmodified	_IPGFYAR_	TGME49_218820-t26_1-p1	alba 2 GN=TGME49_218820	2	412.227	-0.098932	0.026895	71.949	1
1321	IPVIVKAR	8	malon(K)	_IPVIVK(ma)AR_	TGME49_310490-t26_1-p1	ribosomal protein RPL27A GN=TGME49_310490	2	491.308	-0.69962	0.01411	99.442	1
1322	IPYGGAAPPR	10	Unmodified	_IPYGGAAPPR_	TGME49_254720-t26_1-p1	dense granule protein GRA8 GN=TGME49_254720	2	499.775	-0.087572	0.0045246	62.463	1
1323	IQDALCATK	9	Unmodified	_IQDALCATK_	TGME49_247550-t26_1-p1	heat shock protein HSP60 GN=TGME49_247550	2	510.263	-0.21153	0.0031995	80.102	1
1326	IQGCPALVTEACSK	14	Unmodified	_IQGCPALVTEACSK_	TGME49_312630-t26_1-p1	anonymous antigen-1, putative GN=TGME49_312630	2	767.374	-0.13617	0.00077731	54.09	1
1327	IQLLENPDDAK	11	Unmodified	_IQLLENPDDAK_	TGME49_319340-t26_1-p1	Putative kelch motif protein(predict) GN=TGME49_319340	2	628.33	1.9434	0.023448	37.327	1
1328	IQQLITDFFNGK	12	Unmodified	_IQQLITDFFNGK_	TGME49_273760-t26_1-p1	heat shock protein HSP70 GN=TGME49_273760	2	712.383		3.231e-28	110.08	1
1329	IQQLITDFFNGK	12	Unmodified	_IQQLITDFFNGK_	TGME49_273760-t26_1-p1	heat shock protein HSP70 GN=TGME49_273760	2	712.383	-0.58818	6.8929e-41	168.3	1
1330	IQSDEQEFIYGK	12	Unmodified	_IQSDEQEFIYGK_	TGME49_211030-t26_1-p1	hypothetical protein GN=TGME49_211030	2	728.851	-0.23371	0.021979	35.677	1
1331	IQYANFVK	8	Unmodified	_IQYANFVK_	TGME49_269442-t26_1-p1	calmodulin, putative GN=TGME49_269442	2	491.771	1.234	0.014089	70.69	1
1332	IQYANFVK	8	Unmodified	_IQYANFVK_	TGME49_269442-t26_1-p1	calmodulin, putative GN=TGME49_269442	2	491.771	1.0773	0.0021369	87.323	1
1333	ISAGSSSPTR	10	Unmodified	_ISAGSSSPTR_	TGME49_226430-t26_1-p1	reticulon protein GN=TGME49_226430	2	481.749	0.11581	6.9542e-06	106.4	1
1334	ISAGYHLR	8	Unmodified	_ISAGYHLR_	TGME49_311470-t26_1-p1	rhoptry neck protein RON5 GN=TGME49_311470	2	458.754	0.44933	0.011891	73.26	1
1335	ISATGAQVVLSR	12	Unmodified	_ISATGAQVVLSR_	TGME49_297500-t26_1-p1	T-complex protein 1 eta subunit GN=TGME49_297500	2	601.349	0.11041	0.00040376	66.004	1
1336	ISCIQTHEK	9	Unmodified	_ISCIQTHEK_	TGME49_232940-t26_1-p1	heat shock protein HSP20 GN=TGME49_232940	2	558.279	-2.0567	0.00068479	96.143	1
1337	ISCIQTHEK	9	Unmodified	_ISCIQTHEK_	TGME49_232940-t26_1-p1	heat shock protein HSP20 GN=TGME49_232940	2	558.279	0.27549	0.0014813	85.533	1
1338	ISCIQTHEK	9	Unmodified	_ISCIQTHEK_	TGME49_232940-t26_1-p1	heat shock protein HSP20 GN=TGME49_232940	3	372.522	-0.78356	0.002063	64.927	1
1339	ISEDLSTLR	9	Unmodified	_ISEDLSTLR_	TGME49_272155-t26_1-p1	Putative transmembrane protein(predict) GN=TGME49_272155	2	517.28	0.32822	0.003398	79.474	1
1340	ISFPLLADVSHK	12	Unmodified	_ISFPLLADVSHK_	TGME49_217890-t26_1-p1	alkyl hydroperoxide reductase/ Thiol specific antioxidant/ Mal allergen, putative GN=TGME49_217890	3	442.919	-0.063694	0.02123	24.425	1
1341	ISFPLLADVSHK	12	Unmodified	_ISFPLLADVSHK_	TGME49_217890-t26_1-p1	alkyl hydroperoxide reductase/ Thiol specific antioxidant/ Mal allergen, putative GN=TGME49_217890	3	442.919	0.27528	0.022076	23.956	1
1342	ISFPLLADVSHK	12	Unmodified	_ISFPLLADVSHK_	TGME49_217890-t26_1-p1	alkyl hydroperoxide reductase/ Thiol specific antioxidant/ Mal allergen, putative GN=TGME49_217890	3	442.919	-0.23956	0.00047351	59.116	2
1343	ISGLIYEEIR	10	Unmodified	_ISGLIYEEIR_	TGME49_239260-t26_1-p1	histone H4 GN=TGME49_239260	2	596.832	1.291	0.0016074	76.332	1
1344	ISGLIYEEIR	10	Unmodified	_ISGLIYEEIR_	TGME49_239260-t26_1-p1	histone H4 GN=TGME49_239260	2	596.832	0.95679	0.0021192	68.536	1
1345	ISGLIYEEIR	10	Unmodified	_ISGLIYEEIR_	TGME49_239260-t26_1-p1	histone H4 GN=TGME49_239260	2	596.832	1.9858	0.031023	40.496	1
1346	ISGTQALIQR	10	Unmodified	_ISGTQALIQR_	TGME49_208370-t26_1-p1	myosin heavy chain, putative GN=TGME49_208370	2	543.817	-0.73855	3.7764e-05	96.143	1
1347	ISLSQFK	7	Unmodified	_ISLSQFK_	TGME49_217890-t26_1-p1	alkyl hydroperoxide reductase/ Thiol specific antioxidant/ Mal allergen, putative GN=TGME49_217890	2	411.74	0.69131	0.011089	107.43	1
1348	ISLYVTSYPK	10	Unmodified	_ISLYVTSYPK_	TGME49_234380-t26_1-p1	hypothetical protein GN=TGME49_234380	2	585.824	-0.33078	0.0096388	53.237	1
1349	ISLYVTSYPK	10	Unmodified	_ISLYVTSYPK_	TGME49_234380-t26_1-p1	hypothetical protein GN=TGME49_234380	2	585.824	-0.49274	0.0096388	53.237	1
1350	ISPLYLGQR	9	Unmodified	_ISPLYLGQR_	TGME49_239752-t26_1-p1	Glucosaminyltransferase, putative(predict) GN=TGME49_239752	2	523.803	0.15708	0.0084804	65.224	1
1351	ISPSEMSR	8	Unmodified	_ISPSEMSR_	TGME49_204400-t26_1-p1	ATPase synthase subunit alpha, putative GN=TGME49_204400	2	453.721	-1.7799	0.018007	66.27	1
1352	ISQFFDDVEAGK	12	Unmodified	_ISQFFDDVEAGK_	TGME49_211680-t26_1-p1	protein disulfide isomerase GN=TGME49_211680	2	678.328	0.42846	2.1837e-05	83.53	1
1353	ISQMAIDAVR	10	Unmodified	_ISQMAIDAVR_	TGME49_205440-t26_1-p1	CCT chaperonin gamma subunit GN=TGME49_205440	2	552.298		0.0038784	61.344	1
1354	ISQQAYNQAGSTDSSAGSEGTGSESGDKK	29	Unmodified	_ISQQAYNQAGSTDSSAGSEGTGSESGDKK_	TGME49_251780-t26_1-p1	heat shock protein GN=TGME49_251780	3	949.755	0.31232	0.013924	21.024	1
1355	ISQYQVVGR	9	Unmodified	_ISQYQVVGR_	TGME49_262670-t26_1-p1	ribosomal protein RPL18A GN=TGME49_262670	2	525.291	-0.016513	0.00044116	111.82	1
1357	ISTAMPIPK	9	Unmodified	_ISTAMPIPK_	TGME49_263050-t26_1-p1	ribosomal protein RPL13 GN=TGME49_263050	2	479.276	0.80585	0.032565	45.368	1
1358	ITDIGLLE	8	Unmodified	_ITDIGLLE_	TGME49_221210-t26_1-p1	cyclophilin GN=TGME49_221210	1	873.493	0.13262	0.011041	39.218	1
1359	ITITNDK	7	Unmodified	_ITITNDK_	TGME49_311720-t26_1-p1	chaperonin protein BiP GN=TGME49_311720	2	402.727	-1.4438	0.011121	80.229	1
1360	ITITNDK	7	Unmodified	_ITITNDK_	TGME49_311720-t26_1-p1	chaperonin protein BiP GN=TGME49_311720	2	402.727	-0.51917	0.011144	108	1
1361	ITLSAVEPR	9	Unmodified	_ITLSAVEPR_	TGME49_262050-t26_1-p1	rhoptry kinase family protein ROP39 GN=TGME49_262050	2	493.287	1.0852	0.024254	50.108	1
1362	ITPATNHATIVCGPYGGISPLDYK	24	Unmodified	_ITPATNHATIVCGPYGGISPLDYK_	TGME49_233450-t26_1-p1	SAG-related sequence SRS29A GN=TGME49_233450	3	849.097	0.55977	0.026045	21.647	1
1363	ITPSYVAFTDDDR	13	Unmodified	_ITPSYVAFTDDDR_	TGME49_311720-t26_1-p1	chaperonin protein BiP GN=TGME49_311720	2	750.354	-0.16347	0.0012844	54.09	1
1364	ITPSYVAFTDDDR	13	Unmodified	_ITPSYVAFTDDDR_	TGME49_311720-t26_1-p1	chaperonin protein BiP GN=TGME49_311720	2	750.354	0.56685	0.0003547	62.287	1
1365	ITPSYVAFTDDDRK	14	Unmodified	_ITPSYVAFTDDDRK_	TGME49_311720-t26_1-p1	chaperonin protein BiP GN=TGME49_311720	3	543.27	1.7492	3.5099e-11	95.981	1
1366	ITYFGTLTQK	10	Unmodified	_ITYFGTLTQK_	TGME49_308020-t26_1-p1	SAG-related sequence SRS57 GN=TGME49_308020	2	586.322	0.3163	0.0045231	62.466	1
1367	ITYFGTLTQK	10	Unmodified	_ITYFGTLTQK_	TGME49_308020-t26_1-p1	SAG-related sequence SRS57 GN=TGME49_308020	2	586.322	0.47859	0.01549	45.433	1
1368	IVAAGGYVTNGR	12	Unmodified	_IVAAGGYVTNGR_	TGME49_232340-t26_1-p1	protein phosphatase 2C domain-containing protein GN=TGME49_232340	2	589.32	0.18536	0.023949	34.75	1
1369	IVALNPNR	8	Unmodified	_IVALNPNR_	TGME49_270830-t26_1-p1	small nuclear ribonucleoprotein GN=TGME49_270830	2	448.769	0.036913	0.0020704	94.262	1
1370	IVAYDPENVFK	11	Unmodified	_IVAYDPENVFK_	TGME49_243580-t26_1-p1	Hit family protein involved in cell-cycle regulation, putative GN=TGME49_243580	2	647.838	1.2716	0.0074694	46.352	1
1371	IVDLYIPR	8	Unmodified	_IVDLYIPR_	TGME49_259240-t26_1-p1	ribosomal protein RPS21 GN=TGME49_259240	2	494.795	0.30511	0.0038178	84.568	1
1372	IVDLYIPR	8	Unmodified	_IVDLYIPR_	TGME49_259240-t26_1-p1	ribosomal protein RPS21 GN=TGME49_259240	2	494.795	-0.04828	0.0021147	108.46	1
1373	IVEFINAER	9	Unmodified	_IVEFINAER_	TGME49_269885-t26_1-p1	rhoptry metalloprotease toxolysin TLN1 GN=TGME49_269885	2	545.798	-1.2364	0.030401	39.848	1
1374	IVELDLTPEEK	11	Unmodified	_IVELDLTPEEK_	TGME49_318430-t26_1-p1	malate dehydrogenase MDH GN=TGME49_318430	2	643.348	-0.085522	0.0063532	50.354	1
1375	IVETIKPVVK	10	Unmodified	_IVETIKPVVK_	TGME49_216000-t26_1-p1	alveolin domain containing intermediate filament IMC3 GN=TGME49_216000	3	375.913	-0.30632	0.013354	59.067	1
1376	IVGEHHHSQYIYTR	14	Unmodified	_IVGEHHHSQYIYTR_	TGME49_231140-t26_1-p1	ribosomal protein RPS25 GN=TGME49_231140	3	580.625	1.6468	0.00041911	47.639	1
1377	IVGEHHHSQYIYTR	14	Unmodified	_IVGEHHHSQYIYTR_	TGME49_231140-t26_1-p1	ribosomal protein RPS25 GN=TGME49_231140	4	435.721	0.84137	1.2123e-08	83.869	1
1378	IVGEHHHSQYIYTR	14	Unmodified	_IVGEHHHSQYIYTR_	TGME49_231140-t26_1-p1	ribosomal protein RPS25 GN=TGME49_231140	3	580.625	2.051	0.0014847	42.317	1
1379	IVGEHHHSQYIYTR	14	Unmodified	_IVGEHHHSQYIYTR_	TGME49_231140-t26_1-p1	ribosomal protein RPS25 GN=TGME49_231140	4	435.721	0.21124	1.0008e-10	95.428	1
1380	IVIELLGR	8	Unmodified	_IVIELLGR_	TGME49_234450-t26_1-p1	ribosomal protein RPS15A GN=TGME49_234450	2	456.797	1.3681	0.00234	106.04	1
1381	IVIELLGR	8	Unmodified	_IVIELLGR_	TGME49_234450-t26_1-p1	ribosomal protein RPS15A GN=TGME49_234450	2	456.797	0.50894	0.0019601	110.12	1
1382	IVKPQGVEPTEIENEVAK	18	Unmodified	_IVKPQGVEPTEIENEVAK_	TGME49_239100-t26_1-p1	ribosomal protein RPS7 GN=TGME49_239100	3	660.693	0.11468	0.00017701	48.288	1
1383	IVLEQTHDANTPITDTMK	18	Unmodified	_IVLEQTHDANTPITDTMK_	TGME49_316330-t26_1-p1	superoxide dismutase SOD2 GN=TGME49_316330	3	676.342	-0.64381	0.0061461	27.714	1
1384	IVLSFDVAK	9	Unmodified	_IVLSFDVAK_	TGME49_283540-t26_1-p1	MIC20(predict) GN=TGME49_283540	2	496.295	0.74858	0.01499	56.013	1
1385	IVLSFDVAK	9	Unmodified	_IVLSFDVAK_	TGME49_283540-t26_1-p1	MIC20(predict) GN=TGME49_283540	2	496.295	0.2052	0.018045	54.066	1
1386	IVNSEEIQR	9	Unmodified	_IVNSEEIQR_	TGME49_309120-t26_1-p1	ribosomal protein RPL4 GN=TGME49_309120	2	544.291	0.69998	0.0031585	80.231	1
1387	IWEAAYLPR	9	Unmodified	_IWEAAYLPR_	TGME49_271888-t26_1-p1	3-ketoacyl-CoA reductase, putative GN=TGME49_271888	2	559.803	0.73169	0.0077854	66.27	1
1388	IWHHTFYNELR	11	Unmodified	_IWHHTFYNELR_	TGME49_209030-t26_1-p1	actin ACT1 GN=TGME49_209030	3	505.921	0.084948	2.2055e-19	143.5	1
1389	IWHHTFYNELR	11	Unmodified	_IWHHTFYNELR_	TGME49_209030-t26_1-p1	actin ACT1 GN=TGME49_209030	4	379.693	0.16077	0.0026382	57.785	1
1390	IWHHTFYNELR	11	Unmodified	_IWHHTFYNELR_	TGME49_209030-t26_1-p1	actin ACT1 GN=TGME49_209030	2	758.378	0.12362	6.6312e-06	90.05	1
1391	IWHHTFYNELR	11	Unmodified	_IWHHTFYNELR_	TGME49_209030-t26_1-p1	actin ACT1 GN=TGME49_209030	3	505.921	0.044073	4.6177e-08	112.83	1
1392	IWHHTFYNELR	11	Unmodified	_IWHHTFYNELR_	TGME49_209030-t26_1-p1	actin ACT1 GN=TGME49_209030	3	505.921	0.028126	4.1557e-08	113.69	1
1393	IWHHTFYNELR	11	Unmodified	_IWHHTFYNELR_	TGME49_209030-t26_1-p1	actin ACT1 GN=TGME49_209030	4	379.693	-0.48155	3.4747e-05	85.733	1
1394	IWHHTFYNELR	11	Unmodified	_IWHHTFYNELR_	TGME49_209030-t26_1-p1	actin ACT1 GN=TGME49_209030	2	758.378	0.050322	1.3213e-09	125.72	1
1395	IWHHTFYNELR	11	Unmodified	_IWHHTFYNELR_	TGME49_209030-t26_1-p1	actin ACT1 GN=TGME49_209030	3	505.921	0.28423	1.6935e-08	118.23	2
1396	IWHHTFYNELR	11	Unmodified	_IWHHTFYNELR_	TGME49_209030-t26_1-p1	actin ACT1 GN=TGME49_209030	4	379.693	-0.18364	0.00020305	68.847	1
1397	IWHHTFYNELR	11	Unmodified	_IWHHTFYNELR_	TGME49_209030-t26_1-p1	actin ACT1 GN=TGME49_209030	2	758.378	0.041423	5.0023e-05	86.014	1
1398	IYGFYDECK	9	Unmodified	_IYGFYDECK_	TGME49_310700-t26_1-p1	serine/threonine phosophatase PP1 GN=TGME49_310700	2	597.76	1.2069	0.015856	55.461	1
1399	IYGFYDECKR	10	malon(K)	_IYGFYDECK(ma)R_	TGME49_310700-t26_1-p1	serine/threonine phosophatase PP1 GN=TGME49_310700	2	718.811	0.63057	0.023912	41.242	1
1400	IYGFYDECKR	10	malon(K)	_IYGFYDECK(ma)R_	TGME49_310700-t26_1-p1	serine/threonine phosophatase PP1 GN=TGME49_310700	2	718.811	0.45561	0.0068825	55.261	1
1401	IYHFDEPYFTDK	12	Unmodified	_IYHFDEPYFTDK_	TGME49_289830-t26_1-p1	eukaryotic initiation factor-3, delta subunit, putative GN=TGME49_289830	3	525.577	0.16552	0.0025201	42.425	1
1402	IYQGIAPEPR	10	Unmodified	_IYQGIAPEPR_	TGME49_212300-t26_1-p1	Putative transmembrane protein(predict) GN=TGME49_212300	2	572.311	-0.63614	0.024034	42.718	1
1403	IYTTFTNK	8	Unmodified	_IYTTFTNK_	TGME49_290040-t26_1-p1	macrophage migration inhibitory factor, putative GN=TGME49_290040	2	494.261	-0.12705	0.0015579	91.064	1
1404	IYVANFAR	8	Unmodified	_IYVANFAR_	TGME49_313290-t26_1-p1	MORN repeat-containing protein GN=TGME49_313290	2	477.264	0.46018	0.02707	57.177	1
1405	KADALPESGGEK	12	malon(K)	_K(ma)ADALPESGGEK_	TGME49_293320-t26_1-p1	Putative transmembrane protein(predict) GN=TGME49_293320	2	644.307	1.355	0.0071975	43.592	1
1406	KADTSNLNLQAAGVETTETGK	21	Unmodified	_KADTSNLNLQAAGVETTETGK_	TGME49_309730-t26_1-p1	thioredoxin reductase GN=TGME49_309730	3	716.697	1.0954	0.00014709	42.863	1
1407	KADTSNLNLQAAGVETTETGK	21	Unmodified	_KADTSNLNLQAAGVETTETGK_	TGME49_309730-t26_1-p1	thioredoxin reductase GN=TGME49_309730	3	716.697	0.50116	4.5593e-14	70.452	1
1408	KAEEAGAIAQASAEEE	16	Unmodified	_KAEEAGAIAQASAEEE_	TGME49_309120-t26_1-p1	ribosomal protein RPL4 GN=TGME49_309120	2	802.376	0.30058	9.1827e-08	71.08	1
1409	KAEVAGR	7	malon(K)	_K(ma)AEVAGR_	TGME49_268370-t26_1-p1	non-specific serine/threonine protein kinase GN=TGME49_268370	2	408.714		0.018046	54.774	1
1410	KAEVAGR	7	malon(K)	_K(ma)AEVAGR_	TGME49_268370-t26_1-p1	non-specific serine/threonine protein kinase GN=TGME49_268370	2	408.714	0.33977	0.0098125	79.451	1
1411	KAGAGETLQK	10	malon(K)	_K(ma)AGAGETLQK_	TGME49_232800-t26_1-p1	hypothetical protein GN=TGME49_232800	2	544.783	-0.2913	0.017302	43.761	1
1412	KAGHLAVVEK	10	malon(K)	_K(ma)AGHLAVVEK_	TGME49_290950-t26_1-p1	clathrin heavy chain, putative GN=TGME49_290950	3	379.88	-0.26326	0.0056139	57.106	1
1413	KAGVTYINAYAK	12	malon(K)	_K(ma)AGVTYINAYAK_	TGME49_309730-t26_1-p1	thioredoxin reductase GN=TGME49_309730	2	692.859	0.60429	0.00378	48.351	1
1414	KAGVTYINAYAK	12	malon(K)	_K(ma)AGVTYINAYAK_	TGME49_309730-t26_1-p1	thioredoxin reductase GN=TGME49_309730	2	692.859	1.2293	0.0017053	58.885	1
1415	KAMCPIVER	9	malon(K)	_K(ma)AMCPIVER_	TGME49_242330-t26_1-p1	ribosomal protein RPS5 GN=TGME49_242330	2	595.289	2.5596	0.021086	49.448	1
1416	KAMCPIVER	9	malon(K)	_K(ma)AMCPIVER_	TGME49_242330-t26_1-p1	ribosomal protein RPS5 GN=TGME49_242330	2	595.289	-2.3543	0.024207	47.062	1
1417	KATVLCQR	8	malon(K)	_K(ma)ATVLCQR_	TGME49_251630-t26_1-p1	slc30a2 protein GN=TGME49_251630	2	531.274	0.22651	0.001496	92.538	1
1418	KAVEVAQASNK	11	malon(K)	_K(ma)AVEVAQASNK_	TGME49_260440-t26_1-p1	nuclear factor NF3 GN=TGME49_260440	2	615.82	0.16067	0.0038531	56.527	1
1419	KAVGMNAH	8	malon(K)	_K(ma)AVGMNAH_	TGME49_305980-t26_1-p1	pyruvate dehydrogenase complex subunit PDH-E3I GN=TGME49_305980	2	457.213	-0.13784	0.0087312	74.92	1
1420	KAVSVTGPNGDFVQGEPR	18	malon(K)	_K(ma)AVSVTGPNGDFVQGEPR_	TGME49_320600-t26_1-p1	cold-shock DNA-binding domain-containing protein GN=TGME49_320600	2	972.477	0.056831	0.0020232	40.137	1
1421	KCPVCYQK	8	Unmodified	_KCPVCYQK_	TGME49_257680-t26_1-p1	myosin light chain MLC1 GN=TGME49_257680	3	361.509	-0.027477	0.027982	32.142	1
1422	KDDEVMVVR	9	Unmodified	_KDDEVMVVR_	TGME49_248390-t26_1-p1	ribosomal protein RPL26 GN=TGME49_248390	3	364.19	-1.7644	0.023222	27.772	1
1423	KDLLLQQLNLLEER	14	Unmodified	_KDLLLQQLNLLEER_	TGME49_289300-t26_1-p1	methionyl-tRNA synthetase GN=TGME49_289300	4	432.003	4.1355	0.024024	19.678	1
1424	KDVQNIFMATPK	12	malon(K)	_K(ma)DVQNIFMATPK_	TGME49_216860-t26_1-p1	DEAD (Asp-Glu-Ala-Asp) box polypeptide DDX39 GN=TGME49_216860	2	739.371	1.8316	0.0098652	41.695	1
1425	KEAACILR	8	malon(K)	_K(ma)EAACILR_	TGME49_286750-t26_1-p1	MA3 domain-containing protein GN=TGME49_286750	2	523.769	-0.47538	0.014236	67.207	1
1426	KEAEEAAEK	9	malon(K)	_K(ma)EAEEAAEK_	TGME49_216900-t26_1-p1	cytokine induced apoptosis inhibitor 1 family protein GN=TGME49_216900	2	545.749	0.67384	0.010115	59.731	1
1427	KEAEEAAEKEER	12	malon(K)	_K(ma)EAEEAAEKEER_	TGME49_216900-t26_1-p1	cytokine induced apoptosis inhibitor 1 family protein GN=TGME49_216900	2	752.842	0.16524	0.0095063	49.595	1
1428	KEDKNEEQDLEDEEDEEPLAR	21	Unmodified	_KEDKNEEQDLEDEEDEEPLAR_	TGME49_246580-t26_1-p1	Putative transmembrane protein(predict) GN=TGME49_246580	3	854.044	-0.23032	0.013568	37.683	1
1429	KEDQAELEAQCK	12	malon(K)	_K(ma)EDQAELEAQCK_	TGME49_261570-t26_1-p1	ribosomal protein RPL7A GN=TGME49_261570	2	767.838	0.61855	8.373e-06	86.548	1
1430	KEEDDDDIDLFGEDDADKEAVK	22	Unmodified	_KEEDDDDIDLFGEDDADKEAVK_	TGME49_226410-t26_1-p1	EF-1 guanine nucleotide exchange domain-containing protein GN=TGME49_226410	4	628.528	0.53726	1.5011e-07	51.431	1
1431	KEEDDDDIDLFGEDDADKEAVK	22	Unmodified	_KEEDDDDIDLFGEDDADKEAVK_	TGME49_226410-t26_1-p1	EF-1 guanine nucleotide exchange domain-containing protein GN=TGME49_226410	3	837.701	0.30105	5.7531e-29	98.684	1
1432	KEEDDDDIDLFGEDDADKEAVK	22	Unmodified	_KEEDDDDIDLFGEDDADKEAVK_	TGME49_226410-t26_1-p1	EF-1 guanine nucleotide exchange domain-containing protein GN=TGME49_226410	4	628.528	0.72358	2.3589e-11	59.539	1
1433	KEEDDDDIDLFGEDDADKEAVK	22	Unmodified	_KEEDDDDIDLFGEDDADKEAVK_	TGME49_226410-t26_1-p1	EF-1 guanine nucleotide exchange domain-containing protein GN=TGME49_226410	3	837.701	0.72079	1.1418e-81	164.94	1
1434	KEEDDDDIDLFGEDDADKEAVKK	23	Unmodified	_KEEDDDDIDLFGEDDADKEAVKK_	TGME49_226410-t26_1-p1	EF-1 guanine nucleotide exchange domain-containing protein GN=TGME49_226410	4	660.552	0.93228	1.0792e-17	76.21	1
1435	KELNAVNK	8	malon(K)	_K(ma)ELNAVNK_	TGME49_251690-t26_1-p1	seryl-tRNA synthetase, cytoplasmic, putative GN=TGME49_251690	2	501.267	0.33255	0.0011138	89.679	1
1436	KEPGAGSKVTK	11	malon(K)	_KEPGAGSK(ma)VTK_	TGME49_294800-t26_1-p1	elongation factor 1-alpha (EF-1-ALPHA), putative GN=TGME49_294800	3	396.547	0.42482	0.0020454	59.864	1
1437	KEPGAGSKVTK	11	malon(K)	_KEPGAGSK(ma)VTK_	TGME49_294800-t26_1-p1	elongation factor 1-alpha (EF-1-ALPHA), putative GN=TGME49_294800	3	396.547	0.99476	0.0024415	58.268	1
1438	KEVPVEHITVQAR	13	malon(K)	_K(ma)EVPVEHITVQAR_	TGME49_286580-t26_1-p1	Inner membrane complex protein 17(predict) GN=TGME49_286580	3	531.286	-1.0471	0.00012121	65.175	1
1439	KEVPVEHITVQAR	13	malon(K)	_K(ma)EVPVEHITVQAR_	TGME49_286580-t26_1-p1	Inner membrane complex protein 17(predict) GN=TGME49_286580	3	531.286	-0.21174	6.3426e-06	69.111	1
1440	KEVPVEHITVQAR	13	malon(K)	_K(ma)EVPVEHITVQAR_	TGME49_286580-t26_1-p1	Inner membrane complex protein 17(predict) GN=TGME49_286580	2	796.426	0.066746	0.0004876	58.98	1
1441	KFDKPVYHAEIDR	13	Unmodified	_KFDKPVYHAEIDR_	TGME49_216970-t26_1-p1	coronin, putative GN=TGME49_216970	4	405.215	-0.36943	0.0010665	39.629	1
1442	KFGKSIR	7	Acetyl (Protein N-term),malon(K)	_(ac)KFGK(ma)SIR_	TGME49_313870-t26_1-p1	zinc finger, C3HC4 type (RING finger) domain-containing protein GN=TGME49_313870	2	482.267	1.2253	0.021749	46.663	1
1443	KFGKSIR	7	Acetyl (Protein N-term),malon(K)	_(ac)KFGK(ma)SIR_	TGME49_313870-t26_1-p1	zinc finger, C3HC4 type (RING finger) domain-containing protein GN=TGME49_313870	2	482.267	-0.078883	0.021749	46.663	1
1444	KGEEHHVQHLLNVHAASHGPAAQGGAGPLGAGAQK	35	Unmodified	_KGEEHHVQHLLNVHAASHGPAAQGGAGPLGAGAQK_	TGME49_268200-t26_1-p1	RNA recognition motif-containing protein GN=TGME49_268200	5	687.154	-0.064045	0.00031474	31.977	1
1445	KGLELEDDEEEK	12	malon(K)	_K(ma)GLELEDDEEEK_	TGME49_288380-t26_1-p1	heat shock protein HSP90 GN=TGME49_288380	2	760.336	-0.59789	0.0021954	56.339	1
1446	KGLELEDDEEEK	12	Unmodified	_KGLELEDDEEEK_	TGME49_288380-t26_1-p1	heat shock protein HSP90 GN=TGME49_288380	3	478.56	1.3393	0.0099835	32.43	1
1447	KGNADSQLMNTAK	13	malon(K)	_K(ma)GNADSQLMNTAK_	TGME49_249900-t26_1-p1	adenine nucleotide translocator, putative GN=TGME49_249900	2	732.343	-0.082696	0.0090463	40.693	1
1448	KGPGGPAPGAQAGAAAGAGQER	22	Unmodified	_KGPGGPAPGAQAGAAAGAGQER_	TGME49_243960-t26_1-p1	nuclear transport factor 2 (ntf2) domain-containing protein GN=TGME49_243960	3	625.986	0.37736	4.9127e-07	46.953	1
1449	KHAMAQIPANR	11	malon(K)	_K(ma)HAMAQIPANR_	TGME49_217740-t26_1-p1	3-ketoacyl-(acyl-carrier-protein) reductase GN=TGME49_217740	3	441.559	-0.25236	0.00012598	78.705	1
1450	KHAMAQIPANR	11	malon(K)	_K(ma)HAMAQIPANR_	TGME49_217740-t26_1-p1	3-ketoacyl-(acyl-carrier-protein) reductase GN=TGME49_217740	2	661.835	0.28032	0.00024776	70.089	1
1451	KHDLDLICR	9	Unmodified	_KHDLDLICR_	TGME49_310700-t26_1-p1	serine/threonine phosophatase PP1 GN=TGME49_310700	3	390.541	-0.46137	0.00012074	89.886	1
1452	KHLYGAGSEEK	11	malon(K)	_K(ma)HLYGAGSEEK_	TGME49_311290-t26_1-p1	protein tyrosine phosphatase family protein, ptpla protein GN=TGME49_311290	3	435.542	-0.57579	0.014065	40.278	1
1453	KHWNDTTSICR	11	Unmodified	_KHWNDTTSICR_	TGME49_215980-t26_1-p1	Putative transmembrane protein(predict) GN=TGME49_215980	3	473.226	-1.8628	0.0048943	39.702	1
1454	KHWNDTTSICR	11	Unmodified	_KHWNDTTSICR_	TGME49_215980-t26_1-p1	Putative transmembrane protein(predict) GN=TGME49_215980	3	473.226	-1.0397	8.3213e-05	68.536	1
1455	KICGGLR	7	Unmodified	_KICGGLR_	TGME49_228470-t26_1-p1	ribosomal protein RPL15 GN=TGME49_228470	2	402.231		0.031621	35.249	1
1456	KIELQQHAK	9	Unmodified	_KIELQQHAK_	TGME49_300190-t26_1-p1	ribosomal protein RPL37A GN=TGME49_300190	3	365.549	-0.3602	0.0012765	74.464	1
1457	KIFGEAK	7	malon(K)	_K(ma)IFGEAK_	TGME49_300140-t26_1-p1	elongation factor 1-gamma, putative GN=TGME49_300140	2	439.735	0.18074	0.02846	68.787	1
1458	KKDEWEQVNTQK	12	Unmodified	_KKDEWEQVNTQK_	TGME49_244560-t26_1-p1	heat shock protein 90, putative GN=TGME49_244560	4	383.948	1.77	0.012791	25.014	1
1459	KKDEWEQVNTQK	12	Unmodified	_KKDEWEQVNTQK_	TGME49_244560-t26_1-p1	heat shock protein 90, putative GN=TGME49_244560	3	511.595	0.66826	6.2172e-05	87.216	1
1460	KKDEWEQVNTQK	12	Unmodified	_KKDEWEQVNTQK_	TGME49_244560-t26_1-p1	heat shock protein 90, putative GN=TGME49_244560	4	383.948	0.46307	0.031302	15.558	1
1461	KKELLADDWR	10	malon(K)	_K(ma)KELLADDWR_	TGME49_310080-t26_1-p1	AMP-binding enzyme domain-containing protein GN=TGME49_310080	3	453.902	-0.54662	0.0044298	57.106	1
1462	KKHLYGAGSEEK	12	malon(K)	_K(ma)KHLYGAGSEEK_	TGME49_311290-t26_1-p1	protein tyrosine phosphatase family protein, ptpla protein GN=TGME49_311290	3	478.24	0.57447	0.0067839	42.242	1
1463	KKPSGGFPVDK	11	Unmodified	_KKPSGGFPVDK_	TGME49_249970-t26_1-p1	PH domain-containing protein(predict) GN=TGME49_249970	2	580.327	-1.0849	0.0038824	58.172	1
1464	KKPSGGFPVDK	11	Unmodified	_KKPSGGFPVDK_	TGME49_249970-t26_1-p1	PH domain-containing protein(predict) GN=TGME49_249970	2	580.327	0.075259	0.0018106	63.473	1
1465	KLIFCDDGRPPLR	13	malon(K)	_K(ma)LIFCDDGRPPLR_	TGME49_280560-t26_1-p1	selenide, water dikinase GN=TGME49_280560	3	558.287	0.012463	0.0018731	46.318	1
1466	KLIFCDDGRPPLR	13	malon(K)	_K(ma)LIFCDDGRPPLR_	TGME49_280560-t26_1-p1	selenide, water dikinase GN=TGME49_280560	3	558.287	-0.097666	0.0030581	44.511	1
1468	KLLLAITEGK	10	malon(K)	_K(ma)LLLAITEGK_	TGME49_295710-t26_1-p1	HECT-domain (ubiquitin-transferase) domain-containing protein GN=TGME49_295710	2	586.35		0.0051502	51.726	1
1469	KLPQQSQPR	9	Unmodified	_KLPQQSQPR_	TGME49_311230-t26_1-p1	Putative transmembrane protein(predict) GN=TGME49_311230	3	361.209	-0.82026	0.014947	32.751	1
1470	KLSVDALK	8	malon(K)	_K(ma)LSVDALK_	TGME49_244560-t26_1-p1	heat shock protein 90, putative GN=TGME49_244560	2	480.274	-0.4334	0.014774	66.56	1
1471	KNAEWAEEIGR	11	malon(K)	_K(ma)NAEWAEEIGR_	TGME49_222840-t26_1-p1	Ser/Thr phosphatase family protein GN=TGME49_222840	2	694.826	0.42655	0.0060687	47.037	1
1472	KNCAFGEKPEPVNTHLR	17	malon(K)	_K(ma)NCAFGEKPEPVNTHLR_	TGME49_213350-t26_1-p1	ribosomal protein RPS15 GN=TGME49_213350	4	521.506	0.13973	0.00064472	42.059	1
1473	KNCCTSATATK	11	malon(K)	_K(ma)NCCTSATATK_	TGME49_276110-t26_1-p1	cytochrome b5 family heme/steroid binding domain-containing protein GN=TGME49_276110	2	664.284	-0.70164	0.0046122	53.3	1
1474	KNDRPAYIK	9	Unmodified	_KNDRPAYIK_	TGME49_316310-t26_1-p1	superoxide dismutase GN=TGME49_316310	2	552.812	1.1707	0.00016992	117.7	1
1475	KNDRPAYIK	9	Unmodified	_KNDRPAYIK_	TGME49_316310-t26_1-p1	superoxide dismutase GN=TGME49_316310	2	552.812	1.158	0.0070756	67.113	1
1476	KNKLNLEEVK	10	malon(K)	_K(ma)NKLNLEEVK_	TGME49_206610-t26_1-p1	pyruvate dehydrogenase complex subunit PDH-E2 GN=TGME49_206610	3	434.242	-0.086985	0.00085558	78.964	1
1477	KNMNLPNVK	9	malon(K)	_K(ma)NMNLPNVK_	TGME49_256760-t26_1-p1	pyruvate kinase PyK1 GN=TGME49_256760	2	572.295	0.12231	0.0025084	80.706	1
1478	KNMPGLIR	8	malon(K)	_K(ma)NMPGLIR_	TGME49_278720-t26_1-p1	hypothetical protein GN=TGME49_278720	2	507.774	0.66711	0.028063	54.611	1
1479	KNMPGLIR	8	malon(K)	_K(ma)NMPGLIR_	TGME49_278720-t26_1-p1	hypothetical protein GN=TGME49_278720	2	507.774	-0.26856	0.018747	61.78	1
1480	KNPDLVVLVHPLHNK	15	Unmodified	_KNPDLVVLVHPLHNK_	TGME49_219850-t26_1-p1	prolyl-tRNA synthetase (ProRS) GN=TGME49_219850	3	575.005	0.71885	0.0046763	33.147	1
1481	KNPDLVVLVHPLHNK	15	Unmodified	_KNPDLVVLVHPLHNK_	TGME49_219850-t26_1-p1	prolyl-tRNA synthetase (ProRS) GN=TGME49_219850	4	431.506	-0.22497	0.0015987	36.059	1
1482	KPASAAPPAGTNHGR	15	Unmodified	_KPASAAPPAGTNHGR_	TGME49_261950-t26_1-p1	ATP synthase beta subunit ATP-B GN=TGME49_261950	2	716.376	2.0898	0.0089339	31.04	1
1483	KPATPGVTVPK	11	Unmodified	_KPATPGVTVPK_	TGME49_230960-t26_1-p1	splicing factor 3b, subunit 3, putative GN=TGME49_230960	3	365.557	0.40896	0.0056128	38.238	1
1484	KPCIVYNYPK	10	Unmodified	_KPCIVYNYPK_	TGME49_270510-t26_1-p1	asparaginyl-tRNA synthetase (NOB+tRNA synthase) GN=TGME49_270510	3	427.894	0.48261	0.0030573	50.034	1
1485	KPCIVYNYPK	10	Unmodified	_KPCIVYNYPK_	TGME49_270510-t26_1-p1	asparaginyl-tRNA synthetase (NOB+tRNA synthase) GN=TGME49_270510	2	641.337	-0.56406	0.018589	61.56	1
1486	KPGSAGYMGAIGDDPR	16	Unmodified	_KPGSAGYMGAIGDDPR_	TGME49_250880-t26_1-p1	kinase, pfkB family protein GN=TGME49_250880	3	531.256	0.034907	0.0040234	32.858	1
1487	KPLDWVPSK	9	Unmodified	_KPLDWVPSK_	TGME49_235470-t26_1-p1	myosin A GN=TGME49_235470	3	357.206	-0.44415	0.0047703	42.312	1
1488	KPPAAINK	8	Unmodified	_KPPAAINK_	TGME49_295630-t26_1-p1	Putative transmembrane protein(predict) GN=TGME49_295630	2	419.761	2.8355	0.0081676	87.251	1
1489	KPPCVVLK	8	malon(K)	_K(ma)PPCVVLK_	TGME49_264190-t26_1-p1	TRUD domain-containing protein(predict) GN=TGME49_264190	2	513.786	0.17824	0.021094	58.955	1
1490	KPPCVVLK	8	malon(K)	_K(ma)PPCVVLK_	TGME49_264190-t26_1-p1	TRUD domain-containing protein(predict) GN=TGME49_264190	2	513.786	0.43735	0.02014	60.102	1
1491	KPPTVVAYGDVSTVPHYEEVR	21	Unmodified	_KPPTVVAYGDVSTVPHYEEVR_	TGME49_202680-t26_1-p1	peptidase M16, alpha subunit, putative GN=TGME49_202680	4	586.555	0.6716	0.015786	23.509	1
1492	KPSSASTAANASLR	14	malon(K)	_K(ma)PSSASTAANASLR_	TGME49_248120-t26_1-p1	Putative RSC6/BAF60A-like with A SWIB domain, related protein(predict) GN=TGME49_248120	2	723.863	0.17981	0.004876	42.633	1
1493	KPTEQGTVLLQVK	13	Unmodified	_KPTEQGTVLLQVK_	TGME49_232280-t26_1-p1	IMP2_N domain-containing protein(predict) GN=TGME49_232280	3	480.952	0.54812	0.0002142	56.139	1
1494	KQAADQAQESYQK	13	malon(K)	_K(ma)QAADQAQESYQK_	TGME49_263090-t26_1-p1	14-3-3 protein GN=TGME49_263090	2	790.863	0.45411	3.661e-08	82.59	1
1495	KRPQESSLPR	10	Unmodified	_KRPQESSLPR_	TGME49_221720-t26_1-p1	Putative Tbc domain,related protein(predict) GN=TGME49_221720	3	399.895		0.0038319	40.496	1
1496	KRPSPAAVEAAAK	13	Unmodified	_KRPSPAAVEAAAK_	TGME49_246170-t26_1-p1	ARID/BRIGHT DNA binding domain-containing protein GN=TGME49_246170	3	432.586	-0.18123	0.011887	53.479	1
1497	KRPSPAAVEAAAK	13	Unmodified	_KRPSPAAVEAAAK_	TGME49_246170-t26_1-p1	ARID/BRIGHT DNA binding domain-containing protein GN=TGME49_246170	3	432.586	-0.57994	6.5562e-05	69.352	1
1498	KSEHVGEEWIER	12	malon(K)	_K(ma)SEHVGEEWIER_	TGME49_271290-t26_1-p1	SURP motif domain-containing protein(predict) GN=TGME49_271290	3	528.914	0.4007	0.00016882	66.826	1
1499	KSGALVTVTSDSK	13	malon(K)	_K(ma)SGALVTVTSDSK_	TGME49_229140-t26_1-p1	MaoC family domain-containing protein GN=TGME49_229140	2	689.857	0.093685	0.0013075	52.814	1
1500	KVAEIQQRERR	11	malon(K)	_K(ma)VAEIQQRERR_	TGME49_207110-t26_1-p1	hypothetical protein GN=TGME49_207110	2	749.908	1.8826	0.0075039	63.292	1
1501	KVDFLTSK	8	Unmodified	_KVDFLTSK_	TGME49_250770-t26_1-p1	eukaryotic initiation factor-4A, putative GN=TGME49_250770	2	469.271	-0.16963	0.010669	100.58	1
1502	KVDFLTSK	8	Unmodified	_KVDFLTSK_	TGME49_250770-t26_1-p1	eukaryotic initiation factor-4A, putative GN=TGME49_250770	2	469.271	0.025181	6.4057e-08	138.08	1
1503	KVEEELSLLR	10	Unmodified	_KVEEELSLLR_	TGME49_227280-t26_1-p1	dense granule protein GRA3 GN=TGME49_227280	3	405.903	0.30417	0.00023973	82.417	1
1504	KVEVEGVHEVPIIKPR	16	Unmodified	_KVEVEGVHEVPIIKPR_	TGME49_248700-t26_1-p1	alveolin domain containing intermediate filament IMC12 GN=TGME49_248700	4	458.022	-0.19128	2.5296e-13	84.508	1
1505	KVFGDEQAR	9	malon(K)	_K(ma)VFGDEQAR_	TGME49_293590-t26_1-p1	3-oxoacyl-acyl-carrier protein synthase I/II, putative GN=TGME49_293590	2	568.273	1.2417	0.018695	51.276	1
1506	KVGEDPSDVPEALR	14	malon(K)	_K(ma)VGEDPSDVPEALR_	TGME49_289330-t26_1-p1	ubiquitin carboxyl-terminal hydrolase family 2 protein GN=TGME49_289330	2	799.389	-0.00047684	0.0017487	45.618	1
1507	KVLESLGILDSK	12	Unmodified	_KVLESLGILDSK_	TGME49_234380-t26_1-p1	hypothetical protein GN=TGME49_234380	3	434.594	-0.24739	0.0099835	32.43	1
1510	KVPVAFGLYK	10	malon(K)	_K(ma)VPVAFGLYK_	TGME49_226410-t26_1-p1	EF-1 guanine nucleotide exchange domain-containing protein GN=TGME49_226410	2	604.34	1.0118	0.013086	45.368	1
1511	KVQAESGEAQNTLTAETK	18	Unmodified	_KVQAESGEAQNTLTAETK_	TGME49_232710-t26_1-p1	ribosomal protein RPS3A GN=TGME49_232710	3	635.657	-0.4053	0.0089268	24.793	1
1512	KVTPEEAK	8	malon(K)	_K(ma)VTPEEAK_	TGME49_225990-t26_1-p1	acyl transferase domain-containing protein GN=TGME49_225990	2	494.253	0.18565	0.015869	65.241	1
1513	KYEDVCPTSHNMEVPNVK	18	malon(K)	_K(ma)YEDVCPTSHNMEVPNVK_	TGME49_251810-t26_1-p1	translation initiation factor eIF-5A, putative GN=TGME49_251810	3	745.002	0.60313	7.918e-22	91.565	1
1514	KYHVGLQNCSK	11	malon(K)	_K(ma)YHVGLQNCSK_	TGME49_225930-t26_1-p1	triose-phosphate isomerase TPI-I GN=TGME49_225930	3	473.894	-0.16292	0.0037019	56.29	1
1515	KYYEAGAR	8	malon(K)	_K(ma)YYEAGAR_	TGME49_236040-t26_1-p1	fructose-1,6-bisphosphate aldolase GN=TGME49_236040	2	522.243	0.081267	0.013877	67.704	1
1516	KYYEAGAR	8	Unmodified	_KYYEAGAR_	TGME49_236040-t26_1-p1	fructose-1,6-bisphosphate aldolase GN=TGME49_236040	2	479.243	0.80147	0.015078	84.227	1
1517	LAAAPAGGANKPNAPAGK	18	Unmodified	_LAAAPAGGANKPNAPAGK_	TGME49_219850-t26_1-p1	prolyl-tRNA synthetase (ProRS) GN=TGME49_219850	3	525.958	-0.015314	0.0054567	39.91	1
1518	LAAAPAGGANKPNAPAGK	18	Unmodified	_LAAAPAGGANKPNAPAGK_	TGME49_219850-t26_1-p1	prolyl-tRNA synthetase (ProRS) GN=TGME49_219850	3	525.958	0.10112	1.6743e-21	93.424	1
1519	LAALLDGGEASVEK	14	Unmodified	_LAALLDGGEASVEK_	TGME49_270510-t26_1-p1	asparaginyl-tRNA synthetase (NOB+tRNA synthase) GN=TGME49_270510	2	686.87	0.73509	0.00072959	54.402	1
1520	LAALLDGGEASVEK	14	Unmodified	_LAALLDGGEASVEK_	TGME49_270510-t26_1-p1	asparaginyl-tRNA synthetase (NOB+tRNA synthase) GN=TGME49_270510	2	686.87	1.0077	0.00094911	52.966	1
1521	LAANLQSK	8	Unmodified	_LAANLQSK_	TGME49_308090-t26_1-p1	rhoptry protein ROP5 GN=TGME49_308090	2	422.748	0.4952	0.0016696	111.95	1
1522	LAASTGDPFASLLK	14	Unmodified	_LAASTGDPFASLLK_	TGME49_217460-t26_1-p1	glutaminyl-tRNA synthetase (GlnRS) GN=TGME49_217460	2	695.882	0.55919	0.0018549	47.037	1
1523	LADAVGVTLGPK	12	Unmodified	_LADAVGVTLGPK_	TGME49_247550-t26_1-p1	heat shock protein HSP60 GN=TGME49_247550	2	570.835	0.18763	0.022239	35.523	1
1524	LADDDTFEDDR	11	Unmodified	_LADDDTFEDDR_	TGME49_211290-t26_1-p1	rhoptry protein ROP15 GN=TGME49_211290	2	656.27	-1.1856	0.0073223	46.88	1
1525	LADEAVR	7	Unmodified	_LADEAVR_	TGME49_209910-t26_1-p1	histone H2Bv GN=TGME49_209910	2	387.211	-0.99808	0.010802	111.04	1
1526	LADKIEEDDKK	11	Unmodified	_LADKIEEDDKK_	TGME49_311720-t26_1-p1	chaperonin protein BiP GN=TGME49_311720	2	652.341	0.30558	0.0029173	60.641	1
1527	LADKIEEDDKK	11	Unmodified	_LADKIEEDDKK_	TGME49_311720-t26_1-p1	chaperonin protein BiP GN=TGME49_311720	3	435.23	-0.23044	0.0075053	41.242	1
1528	LADKIEEDDKK	11	Unmodified	_LADKIEEDDKK_	TGME49_311720-t26_1-p1	chaperonin protein BiP GN=TGME49_311720	3	435.23	0.20092	4.7646e-06	102.4	1
1529	LADKIEEDDKK	11	Unmodified	_LADKIEEDDKK_	TGME49_311720-t26_1-p1	chaperonin protein BiP GN=TGME49_311720	2	652.341		2.5935e-08	74.698	1
1530	LADLTNDPNIHFR	13	Unmodified	_LADLTNDPNIHFR_	TGME49_306060-t26_1-p1	rhoptry neck protein RON8 GN=TGME49_306060	3	509.263	3.3465	0.0026595	40.475	1
1531	LAELMQMDVK	10	Unmodified	_LAELMQMDVK_	TGME49_229480-t26_1-p1	calcium binding protein precursor, putative GN=TGME49_229480	2	589.301	0.81033	0.030647	40.616	1
1532	LAEQAER	7	Unmodified	_LAEQAER_	TGME49_263090-t26_1-p1	14-3-3 protein GN=TGME49_263090	2	408.714	-0.47634	0.0055876	91.626	1
1533	LAEQAER	7	Unmodified	_LAEQAER_	TGME49_263090-t26_1-p1	14-3-3 protein GN=TGME49_263090	2	408.714	-0.95966	0.0039018	117.93	1
1534	LAFENAK	7	Unmodified	_LAFENAK_	TGME49_288360-t26_1-p1	tryptophanyl-tRNA synthetase (TrpRS2) GN=TGME49_288360	2	396.716	0.25699	0.013641	77.741	1
1535	LAIFGELR	8	Unmodified	_LAIFGELR_	TGME49_235930-t26_1-p1	domain K- type RNA binding proteins family protein GN=TGME49_235930	2	459.774	-0.45225	0.022583	61.679	1
1536	LAIFGELR	8	Unmodified	_LAIFGELR_	TGME49_235930-t26_1-p1	domain K- type RNA binding proteins family protein GN=TGME49_235930	2	459.774	-0.057928	0.011001	74.301	1
1537	LAIVDPATGK	10	Unmodified	_LAIVDPATGK_	TGME49_253430-t26_1-p1	asparagine synthetase, putative GN=TGME49_253430	2	492.79	0.51037	0.0045231	62.466	1
1538	LAIVDPATGK	10	Unmodified	_LAIVDPATGK_	TGME49_253430-t26_1-p1	asparagine synthetase, putative GN=TGME49_253430	2	492.79	-0.68651	0.01549	45.433	1
1539	LAKQAIFALHR	11	malon(K)	_LAK(ma)QAIFALHR_	TGME49_226720-t26_1-p1	translin family protein GN=TGME49_226720	3	451.926	-0.87543	2.8813e-07	98.105	1
1542	LASYNPEEELIK	12	Unmodified	_LASYNPEEELIK_	TGME49_269442-t26_1-p1	calmodulin, putative GN=TGME49_269442	2	703.364	-1.1359	5.2943e-07	94.122	1
1543	LATDLGIMDPEEK	13	Unmodified	_LATDLGIMDPEEK_	TGME49_309210-t26_1-p1	peroxiredoxin 6, putative GN=TGME49_309210	2	716.355	0.54929	0.0037231	45.28	1
1544	LAVTGVAEAAK	11	Unmodified	_LAVTGVAEAAK_	TGME49_226830-t26_1-p1	DnaK family protein GN=TGME49_226830	2	515.301	-1.0891	0.012873	39.625	1
1545	LAVVLDYTR	9	Unmodified	_LAVVLDYTR_	TGME49_291890-t26_1-p1	microneme protein MIC1 GN=TGME49_291890	2	525.303	0.46352	0.010893	61.593	1
1546	LAVVLDYTR	9	Unmodified	_LAVVLDYTR_	TGME49_291890-t26_1-p1	microneme protein MIC1 GN=TGME49_291890	2	525.303	-0.91135	0.00047643	90.15	1
1547	LAVVLDYTR	9	Unmodified	_LAVVLDYTR_	TGME49_291890-t26_1-p1	microneme protein MIC1 GN=TGME49_291890	2	525.303	0.44547	0.022156	51.445	1
1548	LCADVTGGR	9	Unmodified	_LCADVTGGR_	TGME49_260500-t26_1-p1	COPI associated protein, putative GN=TGME49_260500	2	474.732	-0.80449	0.0026147	81.95	1
1549	LCCEDIQGR	9	Unmodified	_LCCEDIQGR_	TGME49_232710-t26_1-p1	ribosomal protein RPS3A GN=TGME49_232710	2	575.753	-0.0051789	0.025741	49.16	1
1550	LCDAFTDVAIRE	12	Unmodified	_LCDAFTDVAIRE_	TGME49_216650-t26_1-p1	S15 sporozoite-expressed protein GN=TGME49_216650	2	705.34	-0.80348	0.013216	52.576	1
1551	LCNFWPHSCR	10	Unmodified	_LCNFWPHSCR_	TGME49_268570-t26_1-p1	zinc finger (CCCH type) motif-containing protein GN=TGME49_268570	3	459.538	-3.0966	0.010955	35.71	1
1552	LCSVIKSHK	9	malon(K)	_LCSVIK(ma)SHK_	TGME49_227100-t26_1-p1	Glutaredoxin domain-containing protein(predict) GN=TGME49_227100	3	386.538	-0.97439	0.0022742	58.511	1
1553	LCVVQYGPDAGK	12	Unmodified	_LCVVQYGPDAGK_	TGME49_267060-t26_1-p1	ribosomal protein RPL14 GN=TGME49_267060	2	653.827	-0.6574	0.0028894	55.261	1
1554	LCYLCVR	7	Unmodified	_LCYLCVR_	TGME49_264660-t26_1-p1	SAG-related sequence SRS44 GN=TGME49_264660	2	492.244	0.19508	0.0091249	97.596	1
1555	LCYLCVR	7	Unmodified	_LCYLCVR_	TGME49_264660-t26_1-p1	SAG-related sequence SRS44 GN=TGME49_264660	2	492.244	-0.2743	0.00041093	124.32	1
1556	LDADEHLSK	9	Unmodified	_LDADEHLSK_	TGME49_209950-t26_1-p1	thioredoxin, putative GN=TGME49_209950	2	514.256	1.1273	0.0014813	85.533	1
1557	LDADEHLSK	9	Unmodified	_LDADEHLSK_	TGME49_209950-t26_1-p1	thioredoxin, putative GN=TGME49_209950	2	514.256	-1.4462	0.0051161	73.885	1
1558	LDAELEEK	8	Unmodified	_LDAELEEK_	TGME49_203990-t26_1-p1	rhoptry protein ROP12 GN=TGME49_203990	2	473.74	0.06327	0.0025783	97.431	1
1559	LDATSNSITAK	11	Unmodified	_LDATSNSITAK_	TGME49_247350-t26_1-p1	thioredoxin domain-containing protein GN=TGME49_247350	2	560.796	0.10922	0.0032672	46.88	1
1560	LDAYYDTAAHK	11	Unmodified	_LDAYYDTAAHK_	TGME49_312600-t26_1-p1	heat shock protein HSP21 GN=TGME49_312600	2	634.301	0.80863	0.00073375	66.267	1
1561	LDEVAFLR	8	Unmodified	_LDEVAFLR_	TGME49_207770-t26_1-p1	PCI domain-containing protein GN=TGME49_207770	2	481.769	-0.26614	0.023349	60.91	1
1562	LDHGACFVGK	10	Unmodified	_LDHGACFVGK_	TGME49_288650-t26_1-p1	dense granule protein GRA12 GN=TGME49_288650	3	368.515	0.36658	0.00042028	73.887	1
1563	LDHGACFVGK	10	Unmodified	_LDHGACFVGK_	TGME49_288650-t26_1-p1	dense granule protein GRA12 GN=TGME49_288650	2	552.269	-0.080188	0.010075	52.6	1
1564	LDHGACFVGK	10	Unmodified	_LDHGACFVGK_	TGME49_288650-t26_1-p1	dense granule protein GRA12 GN=TGME49_288650	3	368.515	0.33091	0.00043649	72.848	1
1565	LDHGACFVGK	10	Unmodified	_LDHGACFVGK_	TGME49_288650-t26_1-p1	dense granule protein GRA12 GN=TGME49_288650	2	552.269	0.28624	4.2718e-06	110.38	1
1566	LDKPDVCQQKDR	12	malon(K)	_LDKPDVCQQK(ma)DR_	TGME49_295650-t26_1-p1	hypothetical protein GN=TGME49_295650	3	529.919	0.61207	2.1221e-05	80.387	1
1567	LDLSCVHSDNK	11	Unmodified	_LDLSCVHSDNK_	TGME49_208030-t26_1-p1	microneme protein MIC4 GN=TGME49_208030	2	644.304	-1.2022	0.0074694	46.352	1
1568	LDLTVEKPEAR	11	malon(K)	_LDLTVEK(ma)PEAR_	TGME49_243600-t26_1-p1	acetyltransferase, GNAT family protein GN=TGME49_243600	2	678.854	-1.7173	0.018998	58.32	1
1569	LDPLLEEQFNTGR	13	Unmodified	_LDPLLEEQFNTGR_	TGME49_245460-t26_1-p1	ribosomal protein RPS8 GN=TGME49_245460	2	766.391	0.35738	5.5796e-06	71.879	1
1570	LDPLLEEQFNTGR	13	Unmodified	_LDPLLEEQFNTGR_	TGME49_245460-t26_1-p1	ribosomal protein RPS8 GN=TGME49_245460	2	766.391	-0.1137	0.011184	40.477	1
1571	LDTGNYSWSSQK	12	Unmodified	_LDTGNYSWSSQK_	TGME49_245460-t26_1-p1	ribosomal protein RPS8 GN=TGME49_245460	2	693.32	0.55757	0.0083473	43.761	1
1572	LDTGNYSWSSQK	12	Unmodified	_LDTGNYSWSSQK_	TGME49_245460-t26_1-p1	ribosomal protein RPS8 GN=TGME49_245460	2	693.32	0.5698	0.0041202	50.088	1
1573	LDVASAK	7	Unmodified	_LDVASAK_	TGME49_300140-t26_1-p1	elongation factor 1-gamma, putative GN=TGME49_300140	2	352.203	0.65118	0.028284	71.342	1
1574	LEAAAAAVIK	10	Unmodified	_LEAAAAAVIK_	TGME49_300260-t26_1-p1	threonyl-tRNA synthetase family protein GN=TGME49_300260	2	478.792	1.7036	0.028347	41.347	1
1575	LEAACQCIR	9	Unmodified	_LEAACQCIR_	TGME49_309752-t26_1-p1	succinate-Coenzyme A ligase, beta subunit, putative GN=TGME49_309752	2	560.766	-0.10621	0.00073667	97.635	1
1576	LEADELESER	10	Unmodified	_LEADELESER_	TGME49_270240-t26_1-p1	MAG1 GN=TGME49_270240	2	595.78	0.39785	0.010316	52.247	1
1577	LEADELESER	10	Unmodified	_LEADELESER_	TGME49_270240-t26_1-p1	MAG1 GN=TGME49_270240	2	595.78	0.36862	0.0015683	76.927	1
1578	LEADYAGLLR	10	Unmodified	_LEADYAGLLR_	TGME49_290950-t26_1-p1	clathrin heavy chain, putative GN=TGME49_290950	2	560.803	0.20952	0.0021981	67.334	1
1579	LEDFAASVDAAR	12	Unmodified	_LEDFAASVDAAR_	TGME49_290950-t26_1-p1	clathrin heavy chain, putative GN=TGME49_290950	2	632.812	2.961	0.0046854	47.712	1
1580	LEDQANKAK	9	malon(K)	_LEDQANK(ma)AK_	TGME49_219310-t26_1-p1	DnaK family protein GN=TGME49_219310	2	551.772	0.499	0.018588	78.136	1
1581	LEDYSYALGQR	11	Unmodified	_LEDYSYALGQR_	TGME49_235930-t26_1-p1	domain K- type RNA binding proteins family protein GN=TGME49_235930	2	657.82	0.89183	0.022232	37.968	1
1582	LEEECAK	7	Unmodified	_LEEECAK_	TGME49_288630-t26_1-p1	nucleosome assembly protein (NAP), putative GN=TGME49_288630	2	439.7	-1.0077	0.031359	69.998	1
1583	LEELGIGYQLHR	12	Unmodified	_LEELGIGYQLHR_	TGME49_219850-t26_1-p1	prolyl-tRNA synthetase (ProRS) GN=TGME49_219850	3	476.593	1.0824	0.00045979	59.367	1
1584	LEELQAVGGK	10	Unmodified	_LEELQAVGGK_	TGME49_219310-t26_1-p1	DnaK family protein GN=TGME49_219310	2	522.29	0.15514	0.0041088	63.32	1
1585	LEEVNQEEDAGTPEGR	16	Unmodified	_LEEVNQEEDAGTPEGR_	TGME49_205558-t26_1-p1	NAC domain-containing protein GN=TGME49_205558	2	886.9	0.12627	2.0108e-15	94.487	1
1586	LEEVNQEEDAGTPEGR	16	Unmodified	_LEEVNQEEDAGTPEGR_	TGME49_205558-t26_1-p1	NAC domain-containing protein GN=TGME49_205558	2	886.9	0.021376	1.0311e-84	191.78	1
1587	LEGNVALVCR	10	Unmodified	_LEGNVALVCR_	TGME49_312630-t26_1-p1	anonymous antigen-1, putative GN=TGME49_312630	2	565.803	-1.1387	6.019e-06	107.79	1
1588	LENILAEPFAR	11	Unmodified	_LENILAEPFAR_	TGME49_270510-t26_1-p1	asparaginyl-tRNA synthetase (NOB+tRNA synthase) GN=TGME49_270510	2	636.851	0.42969	0.01442	42.083	1
1589	LENILAEPFAR	11	Unmodified	_LENILAEPFAR_	TGME49_270510-t26_1-p1	asparaginyl-tRNA synthetase (NOB+tRNA synthase) GN=TGME49_270510	2	636.851	0.71615	0.0063532	50.354	1
1590	LEQIEADAK	9	Unmodified	_LEQIEADAK_	TGME49_232340-t26_1-p1	protein phosphatase 2C domain-containing protein GN=TGME49_232340	2	508.767	0.77783	0.021639	58.699	1
1591	LEQIEADAK	9	Unmodified	_LEQIEADAK_	TGME49_232340-t26_1-p1	protein phosphatase 2C domain-containing protein GN=TGME49_232340	2	508.767	-0.085343	0.010597	50.108	1
1592	LFALLEK	7	Unmodified	_LFALLEK_	TGME49_218410-t26_1-p1	ribosomal protein RPP0 GN=TGME49_218410	2	417.26	0.069238	0.028284	71.342	1
1593	LFAPFDR	7	Unmodified	_LFAPFDR_	TGME49_305050-t26_1-p1	calmodulin, putative GN=TGME49_305050	2	433.232	0.40216	0.0073134	94.539	1
1594	LFEEVANESR	10	Unmodified	_LFEEVANESR_	TGME49_211680-t26_1-p1	protein disulfide isomerase GN=TGME49_211680	2	597.293	1.2333	0.014708	45.829	1
1595	LFEEVANESR	10	Unmodified	_LFEEVANESR_	TGME49_211680-t26_1-p1	protein disulfide isomerase GN=TGME49_211680	2	597.293	0.46726	6.3909e-12	133.81	1
1596	LFHAQAEQMQR	11	Unmodified	_LFHAQAEQMQR_	TGME49_311400-t26_1-p1	WD domain, G-beta repeat-containing protein GN=TGME49_311400	3	453.559	-0.12077	0.0003117	64.82	1
1597	LFLGDFGTYR	10	Unmodified	_LFLGDFGTYR_	TGME49_205250-t26_1-p1	rhoptry protein ROP18 GN=TGME49_205250	2	594.806	0.093539	0.0137	47.302	1
1598	LFLLDLDGSR	10	Unmodified	_LFLLDLDGSR_	TGME49_232050-t26_1-p1	DnaJ domain-containing protein GN=TGME49_232050	2	574.819	-0.81558	0.013295	47.894	1
1599	LFTCLHQQQK	10	Unmodified	_LFTCLHQQQK_	TGME49_280610-t26_1-p1	signal recognition particle receptor alpha subunit GN=TGME49_280610	3	434.892	0.82639	0.001469	59.052	1
1600	LFTLNPETR	9	Unmodified	_LFTLNPETR_	TGME49_234380-t26_1-p1	hypothetical protein GN=TGME49_234380	2	545.798	0.042998	0.00045088	111.61	1
1601	LFTLNPETR	9	Unmodified	_LFTLNPETR_	TGME49_234380-t26_1-p1	hypothetical protein GN=TGME49_234380	2	545.798	0.19517	0.011688	60.398	1
1602	LFTLNPETR	9	Unmodified	_LFTLNPETR_	TGME49_234380-t26_1-p1	hypothetical protein GN=TGME49_234380	2	545.798	-0.9319	0.012014	59.908	1
1603	LFVGGISDDVNDESLR	16	Unmodified	_LFVGGISDDVNDESLR_	TGME49_264610-t26_1-p1	RNA recognition motif-containing protein GN=TGME49_264610	2	868.428	-0.33677	0.02662	29.58	1
1604	LFVHWASHNEVK	12	Unmodified	_LFVHWASHNEVK_	TGME49_311470-t26_1-p1	rhoptry neck protein RON5 GN=TGME49_311470	4	367.444	-0.40751	0.002272	52.495	1
1605	LFVHWASHNEVK	12	Unmodified	_LFVHWASHNEVK_	TGME49_311470-t26_1-p1	rhoptry neck protein RON5 GN=TGME49_311470	4	367.444	-0.32675	0.0095396	39.878	1
1606	LFYLEAPEHK	10	Unmodified	_LFYLEAPEHK_	TGME49_229920-t26_1-p1	Putative transmembrane protein(predict) GN=TGME49_229920	3	416.22	-0.19556	0.019189	34.087	1
1607	LGCYEDDTNR	10	Unmodified	_LGCYEDDTNR_	TGME49_244560-t26_1-p1	heat shock protein 90, putative GN=TGME49_244560	2	621.756	0.61416	0.0017933	73.499	1
1608	LGCYEDDTNR	10	Unmodified	_LGCYEDDTNR_	TGME49_244560-t26_1-p1	heat shock protein 90, putative GN=TGME49_244560	2	621.756	-0.37191	7.5509e-05	91.095	1
1609	LGIHEDTSNR	10	Unmodified	_LGIHEDTSNR_	TGME49_288380-t26_1-p1	heat shock protein HSP90 GN=TGME49_288380	3	381.191	2.3198	0.0073751	40.496	1
1610	LGIHEDTSNR	10	Unmodified	_LGIHEDTSNR_	TGME49_288380-t26_1-p1	heat shock protein HSP90 GN=TGME49_288380	3	381.191	0.53201	0.0019536	55.314	1
1611	LGIHEDTSNR	10	Unmodified	_LGIHEDTSNR_	TGME49_288380-t26_1-p1	heat shock protein HSP90 GN=TGME49_288380	3	381.191	-0.84654	0.0019536	55.314	1
1612	LGIQDVGAQLTGK	13	Unmodified	_LGIQDVGAQLTGK_	TGME49_318230-t26_1-p1	phosphoglycerate kinase PGKI GN=TGME49_318230	2	650.367	-0.033984	0.00045117	60.901	1
1613	LHAQFVR	7	Unmodified	_LHAQFVR_	TGME49_232830-t26_1-p1	vacuolar proton translocating ATPase subunit A, putative GN=TGME49_232830	2	435.751	0.36127	0.0040424	88.734	1
1614	LHEATFAAAR	10	Unmodified	_LHEATFAAAR_	TGME49_308090-t26_1-p1	rhoptry protein ROP5 GN=TGME49_308090	3	362.861	-1.1835	1.4248e-05	93.178	1
1615	LHEATFAAAR	10	Unmodified	_LHEATFAAAR_	TGME49_308090-t26_1-p1	rhoptry protein ROP5 GN=TGME49_308090	2	543.788	-0.16709	0.00152	77.662	1
1616	LHEATFAAAR	10	Unmodified	_LHEATFAAAR_	TGME49_308090-t26_1-p1	rhoptry protein ROP5 GN=TGME49_308090	3	362.861	-0.55778	1.4853e-05	92.838	2
1617	LHEATFAAAR	10	Unmodified	_LHEATFAAAR_	TGME49_308090-t26_1-p1	rhoptry protein ROP5 GN=TGME49_308090	2	543.788	-0.49757	0.0033811	64.82	1
1618	LHEATFAAAR	10	Unmodified	_LHEATFAAAR_	TGME49_308090-t26_1-p1	rhoptry protein ROP5 GN=TGME49_308090	3	362.861	-0.17127	0.01452	33.359	1
1619	LHGEFEKR	8	malon(K)	_LHGEFEK(ma)R_	TGME49_217890-t26_1-p1	alkyl hydroperoxide reductase/ Thiol specific antioxidant/ Mal allergen, putative GN=TGME49_217890	3	367.849	-0.80129	0.029338	53.493	1
1620	LHLTGQK	7	Unmodified	_LHLTGQK_	TGME49_226970-t26_1-p1	ribosomal protein RPS11 GN=TGME49_226970	2	398.737	0.033469	0.026462	72.138	1
1621	LHLVMINAEK	10	Unmodified	_LHLVMINAEK_	TGME49_209950-t26_1-p1	thioredoxin, putative GN=TGME49_209950	2	584.331	0.010736	0.0020446	69.672	1
1622	LHSCAGGEESSGQCLEKQGAGAR	23	malon(K)	_LHSCAGGEESSGQCLEK(ma)QGAGAR_	TGME49_240810-t26_1-p1	Putative transporter(predict) GN=TGME49_240810	3	825.692	-0.1108	2.3982e-23	80.813	1
1623	LHSCAGGEESSGQCLEKQGAGAR	23	malon(K)	_LHSCAGGEESSGQCLEK(ma)QGAGAR_	TGME49_240810-t26_1-p1	Putative transporter(predict) GN=TGME49_240810	3	825.692	-0.069568	2.8494e-36	101.45	1
1627	LHVTEPVVVSASDDK	15	Unmodified	_LHVTEPVVVSASDDK_	TGME49_320210-t26_1-p1	WD domain, G-beta repeat domain containing protein GN=TGME49_320210	3	532.614	-0.73209	3.9676e-05	55.66	1
1628	LIAPPQYVVVTSCYDK	16	Unmodified	_LIAPPQYVVVTSCYDK_	TGME49_313230-t26_1-p1	eukaryotic initiation factor-2, alpha subunit GN=TGME49_313230	2	926.979	1.3144	0.00048818	47.548	1
1629	LICASADQK	9	Unmodified	_LICASADQK_	TGME49_289830-t26_1-p1	eukaryotic initiation factor-3, delta subunit, putative GN=TGME49_289830	2	503.255	-0.44339	0.010969	61.48	1
1630	LIDFLESR	8	Unmodified	_LIDFLESR_	TGME49_236650-t26_1-p1	DEAD (Asp-Glu-Ala-Asp) box polypeptide 17 GN=TGME49_236650	2	496.774	0.96148	0.0077342	78.149	1
1631	LIDLHSPSDVVK	12	Unmodified	_LIDLHSPSDVVK_	TGME49_223050-t26_1-p1	ribosomal protein RPS20 GN=TGME49_223050	3	441.582	0.45364	0.00063351	56.205	1
1632	LIDLHSPSDVVK	12	Unmodified	_LIDLHSPSDVVK_	TGME49_223050-t26_1-p1	ribosomal protein RPS20 GN=TGME49_223050	2	661.869	-0.2394	2.3198e-05	83.182	1
1633	LIDLHSPSDVVK	12	Unmodified	_LIDLHSPSDVVK_	TGME49_223050-t26_1-p1	ribosomal protein RPS20 GN=TGME49_223050	3	441.582		2.0046e-11	75.088	1
1634	LIEALEAMK	9	Unmodified	_LIEALEAMK_	TGME49_258870-t26_1-p1	Putative transmembrane protein(predict) GN=TGME49_258870	2	509.286	-0.062832	0.030695	46.001	1
1635	LIEALEAMK	9	Unmodified	_LIEALEAMK_	TGME49_258870-t26_1-p1	Putative transmembrane protein(predict) GN=TGME49_258870	2	509.286	0.10898	0.01077	61.78	1
1636	LIEALEAMK	9	Unmodified	_LIEALEAMK_	TGME49_258870-t26_1-p1	Putative transmembrane protein(predict) GN=TGME49_258870	2	509.286	0.6458	0.018045	54.066	1
1637	LIEVLYNK	8	Unmodified	_LIEVLYNK_	TGME49_214290-t26_1-p1	DJ-1 family protein GN=TGME49_214290	2	496.295	0.22203	0.0051084	82.452	1
1638	LIEVLYNK	8	Unmodified	_LIEVLYNK_	TGME49_214290-t26_1-p1	DJ-1 family protein GN=TGME49_214290	2	496.295	-0.2142	0.0023107	106.36	1
1639	LIEVLYNKEQAK	12	malon(K)	_LIEVLYNK(ma)EQAK_	TGME49_214290-t26_1-p1	DJ-1 family protein GN=TGME49_214290	2	767.412	0.78891	0.024405	46.318	1
1640	LIEVLYNKEQAK	12	malon(K)	_LIEVLYNK(ma)EQAK_	TGME49_214290-t26_1-p1	DJ-1 family protein GN=TGME49_214290	2	767.412	0.18217	0.00054433	68.044	1
1641	LIFAGKQLEDGR	12	malon(K)	_LIFAGK(ma)QLEDGR_	TGME49_289750-t26_1-p1	ribosomal-ubiquitin protein RPL40 GN=TGME49_289750	2	716.875	0.18972	0.00054433	68.044	1
1642	LIFAGKQLEDGR	12	malon(K)	_LIFAGK(ma)QLEDGR_	TGME49_289750-t26_1-p1	ribosomal-ubiquitin protein RPL40 GN=TGME49_289750	2	716.875	-0.069797	0.00054433	68.044	1
1643	LIGFSCDDVSSHK	13	Unmodified	_LIGFSCDDVSSHK_	TGME49_309210-t26_1-p1	peroxiredoxin 6, putative GN=TGME49_309210	3	488.898	-0.8866	0.0018383	40.278	1
1644	LIGQQVEFK	9	Unmodified	_LIGQQVEFK_	TGME49_238050-t26_1-p1	nuclease and tudor domain-containing protein GN=TGME49_238050	2	531.303	0.60256	0.0088597	64.654	1
1645	LILADECR	8	Unmodified	_LILADECR_	TGME49_240600-t26_1-p1	chaperonin cpn60, putative GN=TGME49_240600	2	495.258	0.12069	0.0069257	79.474	1
1646	LILDLYR	7	Unmodified	_LILDLYR_	TGME49_289380-t26_1-p1	Transmembrane protein(predict) GN=TGME49_289380	2	453.276	-0.23613	0.029268	70.912	1
1647	LILSEGR	7	Unmodified	_LILSEGR_	TGME49_304955-t26_1-p1	serine/threonine specific protein phosphatase GN=TGME49_304955	2	394.237	0.19803	0.029823	70.67	1
1648	LILVGDGGVGK	11	Unmodified	_LILVGDGGVGK_	TGME49_248340-t26_1-p1	GTP-binding nuclear protein ran/tc4 GN=TGME49_248340	2	514.311	0.6441	0.023448	37.327	1
1649	LILVGDGGVGK	11	Unmodified	_LILVGDGGVGK_	TGME49_248340-t26_1-p1	GTP-binding nuclear protein ran/tc4 GN=TGME49_248340	2	514.311	0.11187	0.00012512	81.017	1
1650	LINIELK	7	Unmodified	_LINIELK_	TGME49_261570-t26_1-p1	ribosomal protein RPL7A GN=TGME49_261570	2	421.771	-0.30943	0.023895	73.26	1
1651	LINPSVEAR	9	Unmodified	_LINPSVEAR_	TGME49_295110-t26_1-p1	rhoptry protein ROP7 GN=TGME49_295110	2	499.785	-0.26233	0.01118	61.161	1
1652	LIQCLLSSDAR	11	Unmodified	_LIQCLLSSDAR_	TGME49_229180-t26_1-p1	HEAT repeat-containing protein GN=TGME49_229180	2	638.34	0.99183	0.0091738	44.847	1
1653	LIQEEEEAEHPELVGR	16	Unmodified	_LIQEEEEAEHPELVGR_	TGME49_270320-t26_1-p1	protein phosphatase 2C domain-containing protein GN=TGME49_270320	3	626.646	-0.020725	0.0081855	27.263	1
1654	LKDPSTAAQAEEDVQR	16	Unmodified	_LKDPSTAAQAEEDVQR_	TGME49_236570-t26_1-p1	lysine decarboxylase family protein GN=TGME49_236570	3	586.627	0.17592	1.8177e-05	58.98	1
1655	LKDVEAVCNPIISK	14	Unmodified	_LKDVEAVCNPIISK_	TGME49_311720-t26_1-p1	chaperonin protein BiP GN=TGME49_311720	2	793.435	0.46151	0.00037831	65.374	1
1656	LKDVEAVCNPIISK	14	Unmodified	_LKDVEAVCNPIISK_	TGME49_311720-t26_1-p1	chaperonin protein BiP GN=TGME49_311720	3	529.292	-0.056866	0.012035	29.099	1
1657	LKYCVSDVTTEVK	13	malon(K)	_LK(ma)YCVSDVTTEVK_	TGME49_263300-t26_1-p1	eukaryotic porin protein GN=TGME49_263300	2	814.398	0.29473	4.5507e-05	67.646	1
1658	LKYCVSDVTTEVK	13	malon(K)	_LK(ma)YCVSDVTTEVK_	TGME49_263300-t26_1-p1	eukaryotic porin protein GN=TGME49_263300	2	814.398	0.25301	3.2329e-07	79.317	1
1659	LLAELKPSLGELK	13	Unmodified	_LLAELKPSLGELK_	TGME49_310150-t26_1-p1	AMP-binding enzyme domain-containing protein GN=TGME49_310150	3	470.957	0.032217	0.0077944	45.357	1
1660	LLALQAIETPEYR	13	Unmodified	_LLALQAIETPEYR_	TGME49_295125-t26_1-p1	rhoptry protein ROP4 GN=TGME49_295125	2	758.922	0.85705	4.7201e-05	66.708	1
1661	LLALQATETPEYR	13	Unmodified	_LLALQATETPEYR_	TGME49_295110-t26_1-p1	rhoptry protein ROP7 GN=TGME49_295110	2	752.904	-0.9395	2.8067e-06	74.987	1
1662	LLALQATETPEYR	13	Unmodified	_LLALQATETPEYR_	TGME49_295110-t26_1-p1	rhoptry protein ROP7 GN=TGME49_295110	2	752.904	0.034096	1.062e-18	123.95	1
1663	LLATCGILPLPLDK	14	Unmodified	_LLATCGILPLPLDK_	TGME49_232280-t26_1-p1	IMP2_N domain-containing protein(predict) GN=TGME49_232280	2	762.447	-0.46793	0.00089801	53.3	1
1664	LLDEIKK	7	Unmodified	_LLDEIKK_	TGME49_316310-t26_1-p1	superoxide dismutase GN=TGME49_316310	2	429.768	0.28899	0.019044	90.777	1
1665	LLDVVKDPASR	11	malon(K)	_LLDVVK(ma)DPASR_	TGME49_263070-t26_1-p1	CMGC kinase, CK2 family GN=TGME49_263070	2	649.851	-0.35821	0.022398	56.569	1
1666	LLDVVKDPASR	11	malon(K)	_LLDVVK(ma)DPASR_	TGME49_263070-t26_1-p1	CMGC kinase, CK2 family GN=TGME49_263070	2	649.851	0.26111	0.025583	54.276	1
1667	LLEDAANFAK	10	Unmodified	_LLEDAANFAK_	TGME49_230420-t26_1-p1	sarco/endoplasmic reticulum Ca2+-ATPase GN=TGME49_230420	2	546.29	-1.5823	0.022211	43.297	1
1668	LLEDAQK	7	Unmodified	_LLEDAQK_	TGME49_313380-t26_1-p1	G2 protein(predict) GN=TGME49_313380	2	408.727	0.78753	0.026462	72.138	1
1669	LLFQYVPQMHEGAK	14	Unmodified	_LLFQYVPQMHEGAK_	TGME49_277270-t26_1-p1	NTPase II GN=TGME49_277270	3	554.289	0.046808	0.017902	23.456	1
1670	LLGAPNATK	9	Unmodified	_LLGAPNATK_	TGME49_226410-t26_1-p1	EF-1 guanine nucleotide exchange domain-containing protein GN=TGME49_226410	2	442.764	0.54921	0.022156	51.445	1
1671	LLGAPNATK	9	Unmodified	_LLGAPNATK_	TGME49_226410-t26_1-p1	EF-1 guanine nucleotide exchange domain-containing protein GN=TGME49_226410	2	442.764	0.22715	0.010893	61.593	1
1672	LLGAPNATKFVDASR	15	malon(K)	_LLGAPNATK(ma)FVDASR_	TGME49_226410-t26_1-p1	EF-1 guanine nucleotide exchange domain-containing protein GN=TGME49_226410	2	823.431	0.42106	0.0042315	47.68	1
1673	LLGAPNATKFVDASR	15	malon(K)	_LLGAPNATK(ma)FVDASR_	TGME49_226410-t26_1-p1	EF-1 guanine nucleotide exchange domain-containing protein GN=TGME49_226410	2	823.431	1.5592	0.024789	41.513	1
1674	LLGESPEEAR	10	Unmodified	_LLGESPEEAR_	TGME49_308090-t26_1-p1	rhoptry protein ROP5 GN=TGME49_308090	2	550.783	0.64148	0.0034249	64.73	1
1675	LLGPGLNK	8	Unmodified	_LLGPGLNK_	TGME49_215470-t26_1-p1	ribosomal protein RPL10A GN=TGME49_215470	2	406.255	-0.11244	0.016406	67.981	1
1676	LLGSGLTELLR	11	Unmodified	_LLGSGLTELLR_	TGME49_310080-t26_1-p1	AMP-binding enzyme domain-containing protein GN=TGME49_310080	2	586.356	-0.012994	0.020686	38.783	1
1677	LLGVVYNASNNELVR	15	Unmodified	_LLGVVYNASNNELVR_	TGME49_245460-t26_1-p1	ribosomal protein RPS8 GN=TGME49_245460	2	830.954	0.60696	0.00098987	46.318	1
1678	LLGVVYNASNNELVR	15	Unmodified	_LLGVVYNASNNELVR_	TGME49_245460-t26_1-p1	ribosomal protein RPS8 GN=TGME49_245460	2	830.954	0.093159	0.0069431	39.629	1
1679	LLHFLDQLTNWYVR	14	Unmodified	_LLHFLDQLTNWYVR_	TGME49_207640-t26_1-p1	isoleucyl-tRNA synthetase family protein GN=TGME49_207640	5	364.4	0.10005	0.0319	11.709	1
1680	LLILALER	8	Unmodified	_LLILALER_	TGME49_231970-t26_1-p1	pre-mRNA processing splicing factor PRP8 GN=TGME49_231970	2	470.813	-0.69777	0.025273	58.981	1
1682	LLLGPGPSNSHPEVLR	16	Unmodified	_LLLGPGPSNSHPEVLR_	TGME49_239530-t26_1-p1	alanine-glyoxylate aminotransferase GN=TGME49_239530	3	562.649	0.46145	9.8826e-05	48.899	1
1683	LLLPGELSK	9	Unmodified	_LLLPGELSK_	TGME49_209910-t26_1-p1	histone H2Bv GN=TGME49_209910	2	485.303	0.37569	0.012817	58.699	1
1684	LLMQMTESELQK	12	Unmodified	_LLMQMTESELQK_	TGME49_226960-t26_1-p1	phosphofructokinase PFKII GN=TGME49_226960	2	725.868	-0.090076	0.00083794	64.121	1
1685	LLNQFEQR	8	Unmodified	_LLNQFEQR_	TGME49_294200-t26_1-p1	glucose-6-phosphate 1-dehydrogenase GN=TGME49_294200	2	524.283	-0.37679	0.0025783	97.431	1
1686	LLNQFEQR	8	Unmodified	_LLNQFEQR_	TGME49_294200-t26_1-p1	glucose-6-phosphate 1-dehydrogenase GN=TGME49_294200	2	524.283	-0.32225	0.0077563	78.113	1
1687	LLQADVAAGSEK	12	Unmodified	_LLQADVAAGSEK_	TGME49_202870-t26_1-p1	SAP domain-containing protein GN=TGME49_202870	2	601.325	-2.2634	0.016366	39.006	1
1688	LLQANEFSK	9	Unmodified	_LLQANEFSK_	TGME49_312630-t26_1-p1	anonymous antigen-1, putative GN=TGME49_312630	2	525.285	-0.0026222	0.0035011	79.148	1
1689	LLQMAKKK	8	Oxidation (M),malon(K)	_LLQM(ox)AKK(ma)K_	TGME49_225050-t26_1-p1	adenosylhomocysteinase, putative GN=TGME49_225050	2	531.305	-2.4875	0.017649	40.352	1
1690	LLQSLAEK	8	Unmodified	_LLQSLAEK_	TGME49_283710-t26_1-p1	longevity-assurance protein (LAG1) domain-containing protein GN=TGME49_283710	2	451.271	0.68091	0.0051247	82.426	1
1691	LLSDVLPGATLGSR	14	Unmodified	_LLSDVLPGATLGSR_	TGME49_264660-t26_1-p1	SAG-related sequence SRS44 GN=TGME49_264660	2	699.901	-0.57871	0.014615	35.657	1
1692	LLTEQNMR	8	Unmodified	_LLTEQNMR_	TGME49_221380-t26_1-p1	alba 1 GN=TGME49_221380	2	502.763	-0.54411	0.014829	69.825	1
1693	LLTPDLAQR	9	Unmodified	_LLTPDLAQR_	TGME49_226030-t26_1-p1	AGC kinase GN=TGME49_226030	2	513.801	-0.011563	0.014334	56.432	1
1694	LLTPDLAQR	9	Unmodified	_LLTPDLAQR_	TGME49_226030-t26_1-p1	AGC kinase GN=TGME49_226030	2	513.801	-0.37933	0.00059807	93.649	1
1695	LLTQYLK	7	Unmodified	_LLTQYLK_	TGME49_313390-t26_1-p1	ribosomal protein RPL6 GN=TGME49_313390	2	439.771	0.41346	0.027432	71.715	1
1698	LMELHGEAEDVGR	13	Unmodified	_LMELHGEAEDVGR_	TGME49_232710-t26_1-p1	ribosomal protein RPS3A GN=TGME49_232710	3	485.901	-1.0965	9.0267e-07	73.877	1
1699	LMKEVLHDK	9	malon(K)	_LMK(ma)EVLHDK_	TGME49_288380-t26_1-p1	heat shock protein HSP90 GN=TGME49_288380	3	400.209	-0.60795	0.0071982	43.613	1
1700	LMKGGLEGEEQR	12	malon(K)	_LMK(ma)GGLEGEEQR_	TGME49_223050-t26_1-p1	ribosomal protein RPS20 GN=TGME49_223050	2	716.84	-2.025	0.017219	52.527	1
1701	LMVEELDGTK	10	Oxidation (M)	_LM(ox)VEELDGTK_	TGME49_268850-t26_1-p1	enolase 2 GN=TGME49_268850	2	575.787	0.72433	0.012876	54.259	1
1702	LMVEELDGTK	10	Unmodified	_LMVEELDGTK_	TGME49_268850-t26_1-p1	enolase 2 GN=TGME49_268850	2	567.789	0.81109	0.002066	69.346	1
1703	LMVEELDGTK	10	Unmodified	_LMVEELDGTK_	TGME49_268850-t26_1-p1	enolase 2 GN=TGME49_268850	2	567.789	0.36269	0.0019612	70.942	1
1704	LMVEELDGTK	10	Unmodified	_LMVEELDGTK_	TGME49_268850-t26_1-p1	enolase 2 GN=TGME49_268850	2	567.789	0.1282	0.0137	47.302	1
1705	LMVEELDGTK	10	Unmodified	_LMVEELDGTK_	TGME49_268850-t26_1-p1	enolase 2 GN=TGME49_268850	2	567.789	-3.3322	0.031023	40.496	1
1706	LNCGVDGVTYSNHCVR	16	Unmodified	_LNCGVDGVTYSNHCVR_	TGME49_208450-t26_1-p1	protease inhibitor PI2 GN=TGME49_208450	3	617.614	0.97185	0.00063276	42.947	1
1707	LNELVVK	7	Unmodified	_LNELVVK_	TGME49_290660-t26_1-p1	RNA recognition motif-containing protein GN=TGME49_290660	2	407.755	0.2019	0.0073866	94.662	1
1708	LNELVVKNNTQK	12	malon(K)	_LNELVVK(ma)NNTQK_	TGME49_290660-t26_1-p1	RNA recognition motif-containing protein GN=TGME49_290660	2	743.399	-0.092737	0.00030166	75.316	1
1709	LNESLLR	7	Unmodified	_LNESLLR_	TGME49_250770-t26_1-p1	eukaryotic initiation factor-4A, putative GN=TGME49_250770	2	422.748	0.73305	0.0098267	81.784	1
1710	LNESLLR	7	Unmodified	_LNESLLR_	TGME49_250770-t26_1-p1	eukaryotic initiation factor-4A, putative GN=TGME49_250770	2	422.748	0.55563	0.012047	79.116	1
1711	LNEYLASR	8	Unmodified	_LNEYLASR_	TGME49_226410-t26_1-p1	EF-1 guanine nucleotide exchange domain-containing protein GN=TGME49_226410	2	483.256	1.0814	0.0025724	103.55	1
1712	LNEYLASR	8	Unmodified	_LNEYLASR_	TGME49_226410-t26_1-p1	EF-1 guanine nucleotide exchange domain-containing protein GN=TGME49_226410	2	483.256	0.75992	0.0005583	118.33	1
1713	LNFSHGDHETHAR	13	Unmodified	_LNFSHGDHETHAR_	TGME49_256760-t26_1-p1	pyruvate kinase PyK1 GN=TGME49_256760	4	380.93	0.25581	0.00018739	63.181	1
1714	LNLANPQAGMQK	12	Unmodified	_LNLANPQAGMQK_	TGME49_210690-t26_1-p1	ribosomal protein RPS6 GN=TGME49_210690	2	642.84	-0.57251	0.019445	37.18	1
1715	LNLATCCNR	9	Unmodified	_LNLATCCNR_	TGME49_283850-t26_1-p1	peptidyl-prolyl cis-trans isomerase GN=TGME49_283850	2	561.263	-0.50033	0.0058075	71.614	1
1716	LNLATCCNR	9	Unmodified	_LNLATCCNR_	TGME49_283850-t26_1-p1	peptidyl-prolyl cis-trans isomerase GN=TGME49_283850	2	561.263	-0.71434	0.018531	53.756	1
1717	LNLVHFYDCLR	11	Unmodified	_LNLVHFYDCLR_	TGME49_253430-t26_1-p1	asparagine synthetase, putative GN=TGME49_253430	3	483.915	-0.21482	0.00074485	60.255	1
1719	LNQLGASEQR	10	Unmodified	_LNQLGASEQR_	TGME49_249990-t26_1-p1	Microtubule-binding protein, putative(predict) GN=TGME49_249990	2	558.294	1.5028	0.0015683	76.927	1
1720	LNVCDNCVDR	10	Unmodified	_LNVCDNCVDR_	TGME49_266640-t26_1-p1	Acetyl-coenzyme A synthetase 2, putative GN=TGME49_266640	2	632.774	-0.62894	0.031023	40.496	1
1721	LPFDELNLLQSHQR	14	Unmodified	_LPFDELNLLQSHQR_	TGME49_292080-t26_1-p1	leucyl-tRNA synthetase GN=TGME49_292080	3	570.637	-0.12907	0.0049001	33.787	1
1722	LPIIHQTLGPDYDER	15	Unmodified	_LPIIHQTLGPDYDER_	TGME49_243950-t26_1-p1	prohibitin, putative GN=TGME49_243950	3	589.641	-0.073953	0.010526	26.292	1
1723	LPLDVALER	9	Unmodified	_LPLDVALER_	TGME49_239740-t26_1-p1	dense granule protein GRA14 GN=TGME49_239740	2	513.303	0.81323	0.012014	59.908	1
1724	LPLQDVYK	8	Unmodified	_LPLQDVYK_	TGME49_294800-t26_1-p1	elongation factor 1-alpha (EF-1-ALPHA), putative GN=TGME49_294800	2	488.279	0.6159	0.0058138	81.296	1
1725	LPLQDVYK	8	Unmodified	_LPLQDVYK_	TGME49_294800-t26_1-p1	elongation factor 1-alpha (EF-1-ALPHA), putative GN=TGME49_294800	2	488.279	0.33446	0.028394	56.258	1
1726	LPLQDVYK	8	Unmodified	_LPLQDVYK_	TGME49_294800-t26_1-p1	elongation factor 1-alpha (EF-1-ALPHA), putative GN=TGME49_294800	2	488.279	0.24044	0.0013389	89.698	1
1727	LPQPADGSR	9	Unmodified	_LPQPADGSR_	TGME49_317720-t26_1-p1	eukaryotic translation initiation factor 3 subunit 7, putative GN=TGME49_317720	2	470.746	0.61399	0.018531	53.756	1
1728	LPSCPPDEEAR	11	Unmodified	_LPSCPPDEEAR_	TGME49_219540-t26_1-p1	cytosolic tRNA-Ala synthetase GN=TGME49_219540	2	635.79	-0.31063	0.00034043	67.385	1
1729	LPSCPPDEEAR	11	Unmodified	_LPSCPPDEEAR_	TGME49_219540-t26_1-p1	cytosolic tRNA-Ala synthetase GN=TGME49_219540	2	635.79	0.57078	0.004613	56.548	1
1730	LPSEEYQLGK	10	Unmodified	_LPSEEYQLGK_	TGME49_235470-t26_1-p1	myosin A GN=TGME49_235470	2	582.301	1.248	0.0074719	56.404	1
1731	LPSEEYQLGK	10	Unmodified	_LPSEEYQLGK_	TGME49_235470-t26_1-p1	myosin A GN=TGME49_235470	2	582.301	-0.13884	0.00074012	83.862	1
1732	LPTQYVQTVR	10	Unmodified	_LPTQYVQTVR_	TGME49_224460-t26_1-p1	aminopeptidase n, putative GN=TGME49_224460	2	602.838	-0.025642	0.014708	45.829	1
1733	LPYTTLEPIIR	11	Unmodified	_LPYTTLEPIIR_	TGME49_313380-t26_1-p1	G2 protein(predict) GN=TGME49_313380	2	658.385	0.99285	0.025176	36.417	1
1734	LQANDIVSQHLGK	13	Unmodified	_LQANDIVSQHLGK_	TGME49_314810-t26_1-p1	ribosomal protein RPL7 GN=TGME49_314810	3	474.928	0.11796	0.00055672	49.333	1
1735	LQDCANQDIYEK	12	Unmodified	_LQDCANQDIYEK_	TGME49_252290-t26_1-p1	importin alpha, putative GN=TGME49_252290	2	748.838	0.56659	0.00011223	67.997	1
1738	LQETPFSK	8	Unmodified	_LQETPFSK_	TGME49_251680-t26_1-p1	histamine-releasing factor, putative GN=TGME49_251680	2	475.253	0.2364	0.0094928	76.064	1
1739	LQETPFSK	8	Unmodified	_LQETPFSK_	TGME49_251680-t26_1-p1	histamine-releasing factor, putative GN=TGME49_251680	2	475.253	-0.13087	0.00149	90.64	1
1740	LQHIIILQNK	10	Unmodified	_LQHIIILQNK_	TGME49_235970-t26_1-p1	eukaryotic initiation factor-2 gamma, putative GN=TGME49_235970	3	407.256	-0.2828	0.00041434	74.267	1
1741	LQKLASLLQK	10	malon(K)	_LQK(ma)LASLLQK_	TGME49_271600-t26_1-p1	hypothetical protein GN=TGME49_271600	2	614.369		0.0092841	46.88	1
1742	LQLTLKR	7	malon(K)	_LQLTLK(ma)R_	TGME49_257090-t26_1-p1	NAC domain-containing protein GN=TGME49_257090	2	479.29	-0.30563	0.010716	78.149	1
1743	LQNFLVDK	8	Unmodified	_LQNFLVDK_	TGME49_258580-t26_1-p1	rhoptry protein ROP17 GN=TGME49_258580	2	488.777	0.36629	0.019049	65.224	1
1745	LQQLEQQVKLLR	12	malon(K)	_LQQLEQQVK(ma)LLR_	TGME49_306560-t26_1-p1	Nucleoporin FG repeat region protein(predict) GN=TGME49_306560	2	791.452	-0.15405	3.3994e-07	98.942	1
1746	LQQTTETALCAEKK	14	malon(K)	_LQQTTETALCAEK(ma)K_	TGME49_309570-t26_1-p1	DEAD/DEAH box helicase domain-containing protein GN=TGME49_309570	2	853.917	-0.5552	1.053e-08	85.563	1
1747	LQQTTETALCAEKK	14	malon(K)	_LQQTTETALCAEK(ma)K_	TGME49_309570-t26_1-p1	DEAD/DEAH box helicase domain-containing protein GN=TGME49_309570	2	853.917	-0.14485	3.1086e-14	103.13	1
1748	LQVFEGVPTMVER	13	Unmodified	_LQVFEGVPTMVER_	TGME49_292130-t26_1-p1	ribosomal protein RPL13A GN=TGME49_292130	2	752.895	-0.12756	0.015634	37.613	1
1749	LSAEGPTTMTLVCGK	15	Unmodified	_LSAEGPTTMTLVCGK_	TGME49_233460-t26_1-p1	SAG-related sequence SRS29B GN=TGME49_233460	2	782.889	0.067484	6.8653e-05	59.709	1
1750	LSAEGPTTMTLVCGK	15	Unmodified	_LSAEGPTTMTLVCGK_	TGME49_233460-t26_1-p1	SAG-related sequence SRS29B GN=TGME49_233460	2	782.889	0.017829	4.8636e-11	93.237	1
1751	LSCIVTDVDK	10	Unmodified	_LSCIVTDVDK_	TGME49_310150-t26_1-p1	AMP-binding enzyme domain-containing protein GN=TGME49_310150	2	575.295	-2.1335	0.021006	43.68	1
1752	LSCIVTDVDK	10	Unmodified	_LSCIVTDVDK_	TGME49_310150-t26_1-p1	AMP-binding enzyme domain-containing protein GN=TGME49_310150	2	575.295	-3.3633	0.026196	42.031	1
1753	LSCSGEKDEGETK	13	malon(K)	_LSCSGEK(ma)DEGETK_	TGME49_233838-t26_1-p1	PET112 family, C terminal region domain-containing protein GN=TGME49_233838	2	763.32	-0.089298	0.0025916	59.728	1
1754	LSDQLNKCGAYVR	13	malon(K)	_LSDQLNK(ma)CGAYVR_	TGME49_228190-t26_1-p1	eukaryotic initiation factor-3, subunit 5, putative GN=TGME49_228190	2	805.386	0.35214	3.2787e-29	144.8	1
1755	LSDQLNKCGAYVR	13	malon(K)	_LSDQLNK(ma)CGAYVR_	TGME49_228190-t26_1-p1	eukaryotic initiation factor-3, subunit 5, putative GN=TGME49_228190	2	805.386	0.62202	1.2729e-13	107.74	1
1756	LSEEAEEEEDEKPR	14	Unmodified	_LSEEAEEEEDEKPR_	TGME49_205510-t26_1-p1	nucleolar protein 5, putative GN=TGME49_205510	3	563.92	0.069687	0.0016205	54.276	1
1757	LSEEVDSSPDSTCK	14	Unmodified	_LSEEVDSSPDSTCK_	TGME49_211030-t26_1-p1	hypothetical protein GN=TGME49_211030	2	777.335	-0.16679	0.0001946	62.287	1
1758	LSEEVDSSPDSTCK	14	Unmodified	_LSEEVDSSPDSTCK_	TGME49_211030-t26_1-p1	hypothetical protein GN=TGME49_211030	2	777.335	0.13519	2.3302e-19	128.76	1
1760	LSEPITR	7	Unmodified	_LSEPITR_	TGME49_278990-t26_1-p1	phosphate carrier, putative GN=TGME49_278990	2	408.235	-0.31314	0.0041158	89.142	1
1761	LSEPITR	7	Unmodified	_LSEPITR_	TGME49_278990-t26_1-p1	phosphate carrier, putative GN=TGME49_278990	2	408.235	-0.37261	0.010396	100.19	1
1763	LSGAKITGK	9	malon(K)	_LSGAK(ma)ITGK_	TGME49_263870-t26_1-p1	glutamate-tRNA ligase GN=TGME49_263870	2	480.772		0.015702	49.025	1
1764	LSGDLPFPIIADPER	15	Unmodified	_LSGDLPFPIIADPER_	TGME49_309210-t26_1-p1	peroxiredoxin 6, putative GN=TGME49_309210	2	820.438	-0.26915	0.02395	31.614	1
1765	LSIMENR	7	Unmodified	_LSIMENR_	TGME49_207440-t26_1-p1	ribosomal protein RPS4 GN=TGME49_207440	2	431.726	-0.14601	0.010804	104.45	1
1766	LSLENFLLR	9	Unmodified	_LSLENFLLR_	TGME49_291960-t26_1-p1	rhoptry kinase family protein ROP40 (incomplete catalytic triad) GN=TGME49_291960	2	552.824	-0.93863	0.020378	52.579	1
1767	LSLQEDSIAK	10	Unmodified	_LSLQEDSIAK_	TGME49_266060-t26_1-p1	ribosomal protein RPSA GN=TGME49_266060	2	552.301	-0.78159	0.0053846	60.691	1
1768	LSLQEDSIAK	10	Unmodified	_LSLQEDSIAK_	TGME49_266060-t26_1-p1	ribosomal protein RPSA GN=TGME49_266060	2	552.301	-0.77804	0.00041786	86.344	1
1770	LSTDGLK	7	Unmodified	_LSTDGLK_	TGME49_215470-t26_1-p1	ribosomal protein RPL10A GN=TGME49_215470	2	367.208	0.34788	0.010926	75.189	1
1771	LTEGCSFR	8	Unmodified	_LTEGCSFR_	TGME49_217570-t26_1-p1	ribosomal protein RPS27 GN=TGME49_217570	2	485.227	-0.45375	0.012772	72.23	1
1772	LTEGCSFR	8	Unmodified	_LTEGCSFR_	TGME49_217570-t26_1-p1	ribosomal protein RPS27 GN=TGME49_217570	2	485.227	-0.46524	0.0013389	89.698	1
1773	LTGMAFR	7	Unmodified	_LTGMAFR_	TGME49_289690-t26_1-p1	glyceraldehyde-3-phosphate dehydrogenase GAPDH1 GN=TGME49_289690	2	398.213	-0.27185	0.010449	100.74	1
1774	LTGMAFR	7	Unmodified	_LTGMAFR_	TGME49_289690-t26_1-p1	glyceraldehyde-3-phosphate dehydrogenase GAPDH1 GN=TGME49_289690	2	398.213	-0.24368	0.011167	108.24	1
1775	LTGMAFR	7	Unmodified	_LTGMAFR_	TGME49_289690-t26_1-p1	glyceraldehyde-3-phosphate dehydrogenase GAPDH1 GN=TGME49_289690	2	398.213	-0.91486	0.00038108	124.89	1
1776	LTGMAFR	7	Unmodified	_LTGMAFR_	TGME49_289690-t26_1-p1	glyceraldehyde-3-phosphate dehydrogenase GAPDH1 GN=TGME49_289690	2	398.213	-1.2522	0.0055972	86.866	1
1777	LTIDAYR	7	Unmodified	_LTIDAYR_	TGME49_283540-t26_1-p1	MIC20(predict) GN=TGME49_283540	2	426.235	-1.0834	0.031359	69.998	1
1778	LTIDAYR	7	Unmodified	_LTIDAYR_	TGME49_283540-t26_1-p1	MIC20(predict) GN=TGME49_283540	2	426.235	-1.5713	0.0098267	81.784	1
1779	LTISPSGEGDVFYGK	15	Unmodified	_LTISPSGEGDVFYGK_	TGME49_271050-t26_1-p1	SAG-related sequence SRS34A GN=TGME49_271050	2	785.393	0.15342	6.5009e-11	91.076	1
1780	LTISPSGEGDVFYGK	15	Unmodified	_LTISPSGEGDVFYGK_	TGME49_271050-t26_1-p1	SAG-related sequence SRS34A GN=TGME49_271050	2	785.393	1.2203	9.4375e-07	68.972	1
1781	LTLPGQSVLR	10	Unmodified	_LTLPGQSVLR_	TGME49_240060-t26_1-p1	hypothetical protein GN=TGME49_240060	2	542.33	0.15584	0.030296	40.727	1
1782	LTLPGQSVLR	10	Unmodified	_LTLPGQSVLR_	TGME49_240060-t26_1-p1	hypothetical protein GN=TGME49_240060	2	542.33	0.43113	0.0039613	63.624	1
1783	LTNLVFESESSR	12	Unmodified	_LTNLVFESESSR_	TGME49_294620-t26_1-p1	eukaryotic initiation factor-3, subunit 8, putative GN=TGME49_294620	2	691.352	-0.2445	0.016366	39.006	1
1784	LTNLVFESESSR	12	Unmodified	_LTNLVFESESSR_	TGME49_294620-t26_1-p1	eukaryotic initiation factor-3, subunit 8, putative GN=TGME49_294620	2	691.352	0.16625	0.0037305	51.726	1
1785	LTNSAKDIR	9	malon(K)	_LTNSAK(ma)DIR_	TGME49_240890-t26_1-p1	6-phosphofructokinase GN=TGME49_240890	2	552.288	0.18584	0.0029414	93.839	1
1786	LTNSAKDIR	9	malon(K)	_LTNSAK(ma)DIR_	TGME49_240890-t26_1-p1	6-phosphofructokinase GN=TGME49_240890	2	552.288	0.092939	0.029033	71.085	1
1787	LTPEDMQTQKDNSGK	15	malon(K)	_LTPEDMQTQK(ma)DNSGK_	TGME49_206320-t26_1-p1	Putative transmembrane protein(predict) GN=TGME49_206320	2	889.399	-1.0737	2.1063e-06	73.928	1
1788	LTPEEIER	8	Unmodified	_LTPEEIER_	TGME49_311720-t26_1-p1	chaperonin protein BiP GN=TGME49_311720	2	493.761	1.0406	7.8458e-05	121.09	1
1789	LTPQGYQWGK	10	Unmodified	_LTPQGYQWGK_	TGME49_231970-t26_1-p1	pre-mRNA processing splicing factor PRP8 GN=TGME49_231970	2	589.304	2.3117	0.013779	47.187	1
1790	LTSDYDALDVANK	13	Unmodified	_LTSDYDALDVANK_	TGME49_238010-t26_1-p1	ribosomal protein RPL23A GN=TGME49_238010	2	712.849	0.3484	4.6764e-06	72.891	1
1791	LTSDYDALDVANK	13	Unmodified	_LTSDYDALDVANK_	TGME49_238010-t26_1-p1	ribosomal protein RPL23A GN=TGME49_238010	2	712.849	-0.078639	6.4628e-06	70.889	1
1792	LTTADEKFVTK	11	malon(K)	_LTTADEK(ma)FVTK_	TGME49_211030-t26_1-p1	hypothetical protein GN=TGME49_211030	2	669.843	0.56897	0.031246	50.102	1
1793	LTTSATVR	8	Unmodified	_LTTSATVR_	TGME49_215980-t26_1-p1	Putative transmembrane protein(predict) GN=TGME49_215980	2	424.745	-0.68131	0.0028191	98.933	1
1794	LTTSATVR	8	Unmodified	_LTTSATVR_	TGME49_215980-t26_1-p1	Putative transmembrane protein(predict) GN=TGME49_215980	2	424.745	-0.57628	0.0051247	82.426	1
1795	LTVCALR	7	Unmodified	_LTVCALR_	TGME49_300000-t26_1-p1	ribosomal protein RPL18 GN=TGME49_300000	2	416.739	-1.1862	0.00030925	126.24	1
1796	LTVPIEK	7	Unmodified	_LTVPIEK_	TGME49_233460-t26_1-p1	SAG-related sequence SRS29B GN=TGME49_233460	2	400.25	-1.0873	0.01469	77.282	1
1797	LTVPIEK	7	Unmodified	_LTVPIEK_	TGME49_233460-t26_1-p1	SAG-related sequence SRS29B GN=TGME49_233460	2	400.25	-0.5421	0.01469	77.282	1
1798	LVAGSAVPR	9	Unmodified	_LVAGSAVPR_	TGME49_289300-t26_1-p1	methionyl-tRNA synthetase GN=TGME49_289300	2	435.264	-0.92667	0.020378	52.579	1
1799	LVAGSAVPR	9	Unmodified	_LVAGSAVPR_	TGME49_289300-t26_1-p1	methionyl-tRNA synthetase GN=TGME49_289300	2	435.264	-0.12107	0.0088597	64.654	1
1800	LVAHLQDEGVVHGK	14	Unmodified	_LVAHLQDEGVVHGK_	TGME49_295110-t26_1-p1	rhoptry protein ROP7 GN=TGME49_295110	3	501.276	-0.43382	6.0909e-09	82.069	1
1801	LVAHLQDEGVVHGK	14	Unmodified	_LVAHLQDEGVVHGK_	TGME49_295110-t26_1-p1	rhoptry protein ROP7 GN=TGME49_295110	2	751.41	0.52104	3.5517e-15	109.83	1
1802	LVAHLQDEGVVHGK	14	Unmodified	_LVAHLQDEGVVHGK_	TGME49_295110-t26_1-p1	rhoptry protein ROP7 GN=TGME49_295110	3	501.276	0.016743	1.0528e-06	68.972	1
1803	LVDDPSAPEGK	11	Unmodified	_LVDDPSAPEGK_	TGME49_239820-t26_1-p1	D-3-phosphoglycerate dehydrogenase GN=TGME49_239820	2	564.283	0.625	0.00022475	74.611	1
1804	LVDFCVQDFK	10	Unmodified	_LVDFCVQDFK_	TGME49_273760-t26_1-p1	heat shock protein HSP70 GN=TGME49_273760	2	635.81	-0.19052	0.0019612	70.942	1
1805	LVEEGVQR	8	Unmodified	_LVEEGVQR_	TGME49_291890-t26_1-p1	microneme protein MIC1 GN=TGME49_291890	2	465.256	-0.045191	0.0097715	75.738	1
1806	LVEEGVQR	8	Unmodified	_LVEEGVQR_	TGME49_291890-t26_1-p1	microneme protein MIC1 GN=TGME49_291890	2	465.256	-0.19145	0.0019281	93.374	1
1807	LVELAHYMSVQDGA	14	Unmodified	_LVELAHYMSVQDGA_	TGME49_289690-t26_1-p1	glyceraldehyde-3-phosphate dehydrogenase GAPDH1 GN=TGME49_289690	2	766.874	0.38841	4.5721e-06	68.676	1
1808	LVELAHYMSVQDGA	14	Unmodified	_LVELAHYMSVQDGA_	TGME49_289690-t26_1-p1	glyceraldehyde-3-phosphate dehydrogenase GAPDH1 GN=TGME49_289690	2	766.874	0.40622	3.9545e-08	78.324	1
1809	LVELDTGVASPVFAR	15	Unmodified	_LVELDTGVASPVFAR_	TGME49_220950-t26_1-p1	Mitochondrial association factor 1(predict) GN=TGME49_220950	2	787.433	0.56206	0.002411	44.252	1
1810	LVELDTGVASPVFAR	15	Unmodified	_LVELDTGVASPVFAR_	TGME49_220950-t26_1-p1	Mitochondrial association factor 1(predict) GN=TGME49_220950	2	787.433	-0.19371	0.0017505	44.925	1
1811	LVEYGVVSEK	10	Unmodified	_LVEYGVVSEK_	TGME49_236570-t26_1-p1	lysine decarboxylase family protein GN=TGME49_236570	2	561.806	0.057494	0.01549	45.433	1
1812	LVEYGVVSEK	10	Unmodified	_LVEYGVVSEK_	TGME49_236570-t26_1-p1	lysine decarboxylase family protein GN=TGME49_236570	2	561.806	-0.53423	0.0061086	59.198	1
1813	LVGDAAKNQVAR	12	malon(K)	_LVGDAAK(ma)NQVAR_	TGME49_273760-t26_1-p1	heat shock protein HSP70 GN=TGME49_273760	2	664.352	0.083083	0.0040958	64.104	1
1814	LVGDAAKNQVAR	12	malon(K)	_LVGDAAK(ma)NQVAR_	TGME49_273760-t26_1-p1	heat shock protein HSP70 GN=TGME49_273760	2	664.352	0.94054	0.0051256	63.185	1
1815	LVIGMTDGESDSDFR	15	Oxidation (M)	_LVIGM(ox)TDGESDSDFR_	TGME49_201780-t26_1-p1	microneme protein MIC2 GN=TGME49_201780	2	829.372	0.51587	0.00010951	58.885	1
1816	LVIGMTDGESDSDFR	15	Unmodified	_LVIGMTDGESDSDFR_	TGME49_201780-t26_1-p1	microneme protein MIC2 GN=TGME49_201780	2	821.375	0.099092	7.6032e-05	58.885	1
1817	LVLIGDSGVGK	11	Unmodified	_LVLIGDSGVGK_	TGME49_258130-t26_1-p1	Rab1 protein GN=TGME49_258130	2	529.316	0.32635	0.010978	43.897	1
1818	LVLMVADKSQANTQR	15	malon(K)	_LVLMVADK(ma)SQANTQR_	TGME49_278050-t26_1-p1	proteasome subunit alpha type 1, putative GN=TGME49_278050	2	880.454	-0.033842	0.001479	54.103	1
1819	LVLPGELAK	9	Unmodified	_LVLPGELAK_	TGME49_251870-t26_1-p1	histone H2Bb GN=TGME49_251870	2	470.297	0.28402	0.029488	40.058	1
1820	LVLPGELAK	9	Unmodified	_LVLPGELAK_	TGME49_251870-t26_1-p1	histone H2Bb GN=TGME49_251870	2	470.297	0.33492	0.027417	48.091	1
1821	LVLPGELAKHAVSEGTK	17	malon(K)	_LVLPGELAK(ma)HAVSEGTK_	TGME49_251870-t26_1-p1	histone H2Bb GN=TGME49_251870	2	917.999	1.21	0.0012299	48.354	1
1824	LVNFNNAIEAYK	12	Unmodified	_LVNFNNAIEAYK_	TGME49_273520-t26_1-p1	PCI domain-containing protein GN=TGME49_273520	2	698.367	0.60911	0.016366	39.006	1
1825	LVQELEK	7	Unmodified	_LVQELEK_	TGME49_239100-t26_1-p1	ribosomal protein RPS7 GN=TGME49_239100	2	429.75	0.38667	0.019427	75.213	1
1826	LVQELEK	7	Unmodified	_LVQELEK_	TGME49_239100-t26_1-p1	ribosomal protein RPS7 GN=TGME49_239100	2	429.75	-0.36173	0.030155	70.525	1
1827	LVQGLCK	7	Unmodified	_LVQGLCK_	TGME49_205340-t26_1-p1	ribosomal protein RPS12 GN=TGME49_205340	2	409.234	0.80145	0.029268	70.912	1
1828	LVSASSVMTQQLGK	14	Unmodified	_LVSASSVMTQQLGK_	TGME49_256760-t26_1-p1	pyruvate kinase PyK1 GN=TGME49_256760	2	724.893	0.90383	3.3778e-08	79.875	1
1829	LVSASSVMTQQLGK	14	Unmodified	_LVSASSVMTQQLGK_	TGME49_256760-t26_1-p1	pyruvate kinase PyK1 GN=TGME49_256760	2	724.893	-0.031532	3.29e-09	88.075	1
1830	LVSGTTGETLYTHK	14	Unmodified	_LVSGTTGETLYTHK_	TGME49_219320-t26_1-p1	acid phosphatase GAP50 GN=TGME49_219320	2	753.894	0.76696	0.0026132	45.207	1
1831	LVSGTTGETLYTHK	14	Unmodified	_LVSGTTGETLYTHK_	TGME49_219320-t26_1-p1	acid phosphatase GAP50 GN=TGME49_219320	3	502.931	0.76756	0.0077117	32.252	1
1832	LVSGTTGETLYTHK	14	Unmodified	_LVSGTTGETLYTHK_	TGME49_219320-t26_1-p1	acid phosphatase GAP50 GN=TGME49_219320	3	502.931	-0.2341	0.00047892	45.992	1
1833	LVSGTTGETLYTHK	14	Unmodified	_LVSGTTGETLYTHK_	TGME49_219320-t26_1-p1	acid phosphatase GAP50 GN=TGME49_219320	2	753.894		8.794e-11	68.972	1
1834	LVSGVVATQGEAR	13	Unmodified	_LVSGVVATQGEAR_	TGME49_231630-t26_1-p1	alveolin domain containing intermediate filament IMC4 GN=TGME49_231630	2	643.857	-0.12926	0.0013337	53.869	1
1835	LVSGVVATQGEAR	13	Unmodified	_LVSGVVATQGEAR_	TGME49_231630-t26_1-p1	alveolin domain containing intermediate filament IMC4 GN=TGME49_231630	2	643.857	-0.096734	5.5796e-06	71.879	1
1836	LVSGVVATQGEAR	13	Unmodified	_LVSGVVATQGEAR_	TGME49_231630-t26_1-p1	alveolin domain containing intermediate filament IMC4 GN=TGME49_231630	3	429.574	-0.061274	7.8504e-09	84.169	1
1837	LVSLSEQELMDCSR	14	Unmodified	_LVSLSEQELMDCSR_	TGME49_321530-t26_1-p1	cathepsin CPL GN=TGME49_321530	2	833.892	1.0124	0.00065389	54.898	1
1838	LVVLDSTDKDGK	12	Unmodified	_LVVLDSTDKDGK_	TGME49_271810-t26_1-p1	lanp, putative GN=TGME49_271810	3	430.57	0.74116	0.0067245	54.343	1
1839	LVVNADCVHAYPHCWR	16	Unmodified	_LVVNADCVHAYPHCWR_	TGME49_207640-t26_1-p1	isoleucyl-tRNA synthetase family protein GN=TGME49_207640	4	499.987	-0.12059	0.009578	28.283	1
1840	LVVTSLGKR	9	malon(K)	_LVVTSLGK(ma)R_	TGME49_287500-t26_1-p1	T complex chaperonin, putative GN=TGME49_287500	2	529.814	1.2315	0.024642	46.73	1
1841	LVVTSLGKR	9	malon(K)	_LVVTSLGK(ma)R_	TGME49_287500-t26_1-p1	T complex chaperonin, putative GN=TGME49_287500	2	529.814	0.26069	0.0079577	63.624	1
1842	LVYDNNEQDFISLR	14	Unmodified	_LVYDNNEQDFISLR_	TGME49_219640-t26_1-p1	RING-type domain-containing protein(predict) GN=TGME49_219640	3	575.953	0.814	0.014822	24.964	1
1843	LVYDNNEQDFISLR	14	Unmodified	_LVYDNNEQDFISLR_	TGME49_219640-t26_1-p1	RING-type domain-containing protein(predict) GN=TGME49_219640	3	575.953	0.36356	0.015429	24.425	1
1844	LVYDNNEQDFISLR	14	Unmodified	_LVYDNNEQDFISLR_	TGME49_219640-t26_1-p1	RING-type domain-containing protein(predict) GN=TGME49_219640	3	575.953	-1.6404	0.007793	31.215	1
1845	LVYDNNEQDFISLR	14	Unmodified	_LVYDNNEQDFISLR_	TGME49_219640-t26_1-p1	RING-type domain-containing protein(predict) GN=TGME49_219640	3	575.953	0.58738	0.029234	20.236	1
1846	LWGMDALNVK	10	Unmodified	_LWGMDALNVK_	TGME49_204050-t26_1-p1	subtilisin SUB1 GN=TGME49_204050	2	573.802	-0.22773	0.00013862	88.495	1
1847	LWGNNFYNAK	10	Unmodified	_LWGNNFYNAK_	TGME49_205470-t26_1-p1	translation elongation factor 2 family protein, putative GN=TGME49_205470	2	613.801	-1.1447	0.020723	43.77	1
1848	LYASSGLTAINDDPSLGCK	19	Unmodified	_LYASSGLTAINDDPSLGCK_	TGME49_214940-t26_1-p1	MIC2-associated protein M2AP GN=TGME49_214940	2	991.48	0.67992	0.0036939	35.133	1
1849	LYEAYMR	7	Unmodified	_LYEAYMR_	TGME49_297880-t26_1-p1	dense granule protein DG32 GN=TGME49_297880	2	473.229	-0.32781	0.029268	70.912	1
1850	LYEFFEDK	8	Unmodified	_LYEFFEDK_	TGME49_301440-t26_1-p1	calcium-dependent protein kinase CDPK1 GN=TGME49_301440	2	545.758	0.37307	0.021683	62.582	1
1851	LYEFFEDK	8	Unmodified	_LYEFFEDK_	TGME49_301440-t26_1-p1	calcium-dependent protein kinase CDPK1 GN=TGME49_301440	2	545.758	0.21288	0.024237	60.019	1
1852	LYESVLAFR	9	Unmodified	_LYESVLAFR_	TGME49_215980-t26_1-p1	Putative transmembrane protein(predict) GN=TGME49_215980	2	549.303	0.23794	0.00066249	95.502	1
1853	LYESVLAFR	9	Unmodified	_LYESVLAFR_	TGME49_215980-t26_1-p1	Putative transmembrane protein(predict) GN=TGME49_215980	2	549.303	0.15312	0.0054074	72.928	1
1854	LYKDDHEEDTIGEDGNACGK	20	Unmodified	_LYKDDHEEDTIGEDGNACGK_	TGME49_293690-t26_1-p1	profilin PRF GN=TGME49_293690	3	755.99	-0.028649	7.536e-05	46.494	1
1855	LYKDDHEEDTIGEDGNACGK	20	Unmodified	_LYKDDHEEDTIGEDGNACGK_	TGME49_293690-t26_1-p1	profilin PRF GN=TGME49_293690	4	567.245	-0.3079	7.3438e-10	64.275	1
1856	LYKDDHEEDTIGEDGNACGK	20	Unmodified	_LYKDDHEEDTIGEDGNACGK_	TGME49_293690-t26_1-p1	profilin PRF GN=TGME49_293690	4	567.245	-0.67368	2.5757e-09	56.819	1
1857	LYKDDHEEDTIGEDGNACGK	20	Unmodified	_LYKDDHEEDTIGEDGNACGK_	TGME49_293690-t26_1-p1	profilin PRF GN=TGME49_293690	3	755.99	0.019517	4.3704e-27	108.14	1
1858	LYLTVQAVR	9	Unmodified	_LYLTVQAVR_	TGME49_295110-t26_1-p1	rhoptry protein ROP7 GN=TGME49_295110	2	531.819	0.48737	0.0094162	63.816	1
1859	LYNNIQLSK	9	Unmodified	_LYNNIQLSK_	TGME49_273460-t26_1-p1	eukaryotic translation initiation factor 3 subunit 6 interacting protein GN=TGME49_273460	2	546.806	-0.22583	0.02552	49.3	1
1860	LYNNIQLSK	9	Unmodified	_LYNNIQLSK_	TGME49_273460-t26_1-p1	eukaryotic translation initiation factor 3 subunit 6 interacting protein GN=TGME49_273460	2	546.806	1.0863	0.0062814	70.056	1
1861	LYSHLSTGLK	10	Unmodified	_LYSHLSTGLK_	TGME49_312420-t26_1-p1	Putative transmembrane protein(predict) GN=TGME49_312420	3	373.545	-1.9216	0.025238	27.914	1
1862	LYSRPEEEDEDAEEEEKAPETR	22	Unmodified	_LYSRPEEEDEDAEEEEKAPETR_	TGME49_317720-t26_1-p1	eukaryotic translation initiation factor 3 subunit 7, putative GN=TGME49_317720	4	663.545	-0.18549	2.8013e-11	58.093	1
1863	LYSRPEEEDEDAEEEEKAPETR	22	Unmodified	_LYSRPEEEDEDAEEEEKAPETR_	TGME49_317720-t26_1-p1	eukaryotic translation initiation factor 3 subunit 7, putative GN=TGME49_317720	3	884.391	-0.12853	5.2373e-22	86.557	1
1864	LYTYQMCR	8	Unmodified	_LYTYQMCR_	TGME49_265330-t26_1-p1	cell-cycle-associated protein kinase GSK, putative GN=TGME49_265330	2	567.757	0.094041	0.0028293	98.997	1
1865	LYTYQMCR	8	Unmodified	_LYTYQMCR_	TGME49_265330-t26_1-p1	cell-cycle-associated protein kinase GSK, putative GN=TGME49_265330	2	567.757	0.47396	0.010309	75.109	1
1866	MAGLSPDMIFCR	12	Unmodified	_MAGLSPDMIFCR_	TGME49_299210-t26_1-p1	CTP synthase GN=TGME49_299210	2	699.322	-1.1081	0.011176	42.083	1
1867	MAVGQLDEAR	10	Unmodified	_MAVGQLDEAR_	TGME49_283850-t26_1-p1	peptidyl-prolyl cis-trans isomerase GN=TGME49_283850	2	545.271	0.38972	0.0096388	53.237	1
1868	MDSCNYSEDR	10	Oxidation (M)	_M(ox)DSCNYSEDR_	TGME49_294800-t26_1-p1	elongation factor 1-alpha (EF-1-ALPHA), putative GN=TGME49_294800	2	646.73	-0.54507	0.0080597	60.255	1
1869	MDSCNYSEDR	10	Oxidation (M)	_M(ox)DSCNYSEDR_	TGME49_294800-t26_1-p1	elongation factor 1-alpha (EF-1-ALPHA), putative GN=TGME49_294800	2	646.73	-0.88221	1.6925e-17	146.11	1
1870	MDSCNYSEDR	10	Unmodified	_MDSCNYSEDR_	TGME49_294800-t26_1-p1	elongation factor 1-alpha (EF-1-ALPHA), putative GN=TGME49_294800	2	638.732	-0.041664	0.0014567	78.342	1
1871	MDSIAAADAAIR	12	Unmodified	_MDSIAAADAAIR_	TGME49_321500-t26_1-p1	RNA recognition motif-containing protein GN=TGME49_321500	2	602.803		1.7116e-05	63.091	1
1872	MDSIAAADAAIR	12	Unmodified	_MDSIAAADAAIR_	TGME49_321500-t26_1-p1	RNA recognition motif-containing protein GN=TGME49_321500	2	602.803	2.2068	0.023188	34.96	1
1873	MEAVANQGK	9	Unmodified	_MEAVANQGK_	TGME49_297060-t26_1-p1	phosphoglycerate mutase PGMII GN=TGME49_297060	2	474.234	-0.018058	0.00041427	112.41	1
1874	MEELVHNIR	9	Unmodified	_MEELVHNIR_	TGME49_205470-t26_1-p1	translation elongation factor 2 family protein, putative GN=TGME49_205470	3	380.866	-0.28517	0.030456	29.841	1
1875	MEFQAIDK	8	Unmodified	_MEFQAIDK_	TGME49_229480-t26_1-p1	calcium binding protein precursor, putative GN=TGME49_229480	2	491.239	-0.30767	0.02784	56.432	1
1876	MEIIQDK	7	Unmodified	_MEIIQDK_	TGME49_265450-t26_1-p1	hexokinase GN=TGME49_265450	2	438.728	-0.21612	0.019663	75.109	1
1877	MEIIQDK	7	Unmodified	_MEIIQDK_	TGME49_265450-t26_1-p1	hexokinase GN=TGME49_265450	2	438.728	-0.22138	0.019663	75.109	1
1878	MEIIQDKICLR	11	malon(K)	_MEIIQDK(ma)ICLR_	TGME49_265450-t26_1-p1	hexokinase GN=TGME49_265450	2	752.879	-0.51386	0.0021673	66.989	1
1879	MEIIQDKICLR	11	malon(K)	_MEIIQDK(ma)ICLR_	TGME49_265450-t26_1-p1	hexokinase GN=TGME49_265450	2	752.879	-0.64372	0.00027696	85.554	1
1880	MFTIPGR	7	Unmodified	_MFTIPGR_	TGME49_317720-t26_1-p1	eukaryotic translation initiation factor 3 subunit 7, putative GN=TGME49_317720	2	411.221	-0.59685	0.0046296	88.029	1
1881	MFTIPGR	7	Unmodified	_MFTIPGR_	TGME49_317720-t26_1-p1	eukaryotic translation initiation factor 3 subunit 7, putative GN=TGME49_317720	2	411.221	-1.2968	0.010449	100.74	1
1882	MFVDQAIR	8	Unmodified	_MFVDQAIR_	TGME49_232300-t26_1-p1	ribosomal protein RPS3 GN=TGME49_232300	2	490.255	-0.52908	0.0018995	93.195	1
1883	MFVDQAIR	8	Unmodified	_MFVDQAIR_	TGME49_232300-t26_1-p1	ribosomal protein RPS3 GN=TGME49_232300	2	490.255	-0.45001	0.0027713	101.41	1
1884	MGPSDISTHVR	11	Unmodified	_MGPSDISTHVR_	TGME49_254720-t26_1-p1	dense granule protein GRA8 GN=TGME49_254720	3	400.533	-0.24002	0.0015103	50.354	1
1885	MGPSDISTHVR	11	Unmodified	_MGPSDISTHVR_	TGME49_254720-t26_1-p1	dense granule protein GRA8 GN=TGME49_254720	3	400.533	0.038627	0.0076562	34.264	1
1886	MGYCYFR	7	Unmodified	_MGYCYFR_	TGME49_314100-t26_1-p1	tetratricopeptide repeat-containing protein GN=TGME49_314100	2	498.707	-0.3482	0.0076839	84.359	1
1887	MGYCYFR	7	Unmodified	_MGYCYFR_	TGME49_314100-t26_1-p1	tetratricopeptide repeat-containing protein GN=TGME49_314100	2	498.707	-0.55756	0.026895	71.949	1
1888	MHHHQILAR	9	Unmodified	_MHHHQILAR_	TGME49_251690-t26_1-p1	seryl-tRNA synthetase, cytoplasmic, putative GN=TGME49_251690	3	381.538	-0.39384	7.8236e-05	114.28	1
1889	MHHHQILAR	9	Unmodified	_MHHHQILAR_	TGME49_251690-t26_1-p1	seryl-tRNA synthetase, cytoplasmic, putative GN=TGME49_251690	3	381.538	-0.36288	4.4497e-07	130.27	1
1890	MHTVKSVLLRSGNPK	15	Unmodified	_MHTVKSVLLRSGNPK_	TGME49_279000-t26_1-p1	SAG-related sequence SRS59J GN=TGME49_279000	4	417.491	0.43013	0.0026377	33.265	1
1891	MIDAGMNVCR	10	Unmodified	_MIDAGMNVCR_	TGME49_256760-t26_1-p1	pyruvate kinase PyK1 GN=TGME49_256760	2	583.759	-0.59564	1.139e-05	99.815	1
1892	MIELFPSSK	9	Unmodified	_MIELFPSSK_	TGME49_236540-t26_1-p1	RNA recognition motif-containing protein GN=TGME49_236540	2	526.278	-0.14155	0.026021	48.981	1
1893	MILTPYEGK	9	Unmodified	_MILTPYEGK_	TGME49_263810-t26_1-p1	Putative transmembrane protein(predict) GN=TGME49_263810	2	526.278	-0.33627	0.030695	46.001	1
1894	MISEAEK	7	Unmodified	_MISEAEK_	TGME49_311720-t26_1-p1	chaperonin protein BiP GN=TGME49_311720	2	404.199	-1.0424	0.0055876	91.626	1
1895	MISEAEK	7	Oxidation (M)	_M(ox)ISEAEK_	TGME49_311720-t26_1-p1	chaperonin protein BiP GN=TGME49_311720	2	412.197		0.0085504	71.342	1
1896	MLGETRPLESNPGTLR	16	Unmodified	_MLGETRPLESNPGTLR_	TGME49_295350-t26_1-p1	nucleoside diphosphate kinase, putative GN=TGME49_295350	3	590.977	0.086834	0.0013218	45.614	1
1897	MLGSLGIELK	10	Unmodified	_MLGSLGIELK_	TGME49_205470-t26_1-p1	translation elongation factor 2 family protein, putative GN=TGME49_205470	2	530.807		0.00027526	64.82	1
1898	MLGSLGIELK	10	Unmodified	_MLGSLGIELK_	TGME49_205470-t26_1-p1	translation elongation factor 2 family protein, putative GN=TGME49_205470	2	530.807		0.00027526	64.82	1
1899	MLIQTQDSIPEIK	13	Oxidation (M)	_M(ox)LIQTQDSIPEIK_	TGME49_249900-t26_1-p1	adenine nucleotide translocator, putative GN=TGME49_249900	2	766.405	0.91186	0.0038919	47.712	1
1900	MLNEDELR	8	Unmodified	_MLNEDELR_	TGME49_276140-t26_1-p1	ADP ribosylation factor ARF1 GN=TGME49_276140	2	510.245	0.22165	0.0012635	114.28	1
1901	MLQNVEDNMR	10	Unmodified	_MLQNVEDNMR_	TGME49_297070-t26_1-p1	Alpha-carbonic anhydrase domain-containing protein(predict) GN=TGME49_297070	2	625.287	0.70399	0.012551	48.981	1
1902	MLSCAGADR	9	Unmodified	_MLSCAGADR_	TGME49_288720-t26_1-p1	ribosomal protein RPL10 GN=TGME49_288720	2	490.718	0.027946	0.018539	53.751	1
1903	MLSCAGADR	9	Unmodified	_MLSCAGADR_	TGME49_288720-t26_1-p1	ribosomal protein RPL10 GN=TGME49_288720	2	490.718	0.22725	0.0039665	77.662	1
1904	MLSCAGADR	9	Oxidation (M)	_M(ox)LSCAGADR_	TGME49_288720-t26_1-p1	ribosomal protein RPL10 GN=TGME49_288720	2	498.716		0.0097183	44.318	1
1905	MLSTLLSAER	10	Unmodified	_MLSTLLSAER_	TGME49_297070-t26_1-p1	Alpha-carbonic anhydrase domain-containing protein(predict) GN=TGME49_297070	2	560.805	0.4616	0.0073947	56.548	1
1906	MLTYVPSMR	9	Unmodified	_MLTYVPSMR_	TGME49_301440-t26_1-p1	calcium-dependent protein kinase CDPK1 GN=TGME49_301440	2	549.278	-0.11714	0.0054074	72.928	1
1907	MLTYVPSMR	9	Unmodified	_MLTYVPSMR_	TGME49_301440-t26_1-p1	calcium-dependent protein kinase CDPK1 GN=TGME49_301440	2	549.278	-0.27558	0.0049666	74.376	1
1908	MMAMGKSTIDVK	12	malon(K)	_MMAMGK(ma)STIDVK_	TGME49_263300-t26_1-p1	eukaryotic porin protein GN=TGME49_263300	2	699.327	-1.1645	0.025407	45.614	1
1909	MMEAEGR	7	Unmodified	_MMEAEGR_	TGME49_205700-t26_1-p1	cyclophilin precursor GN=TGME49_205700	2	412.175	-0.71883	0.0059249	86.472	1
1910	MMEAEGR	7	Unmodified	_MMEAEGR_	TGME49_205700-t26_1-p1	cyclophilin precursor GN=TGME49_205700	2	412.175	-1.4397	0.0059249	86.472	1
1911	MMHASFEGVK	10	Unmodified	_MMHASFEGVK_	TGME49_230410-t26_1-p1	peroxiredoxin PRX3 GN=TGME49_230410	3	379.512	-0.77968	0.03026	30.44	1
1912	MMNLGAQLVK	10	Unmodified	_MMNLGAQLVK_	TGME49_247550-t26_1-p1	heat shock protein HSP60 GN=TGME49_247550	2	552.799	0.16836	0.01015	52.49	1
1913	MMNLGAQLVK	10	Unmodified	_MMNLGAQLVK_	TGME49_247550-t26_1-p1	heat shock protein HSP60 GN=TGME49_247550	2	552.799	-0.26667	0.0055266	60.398	1
1914	MMNLGAQLVK	10	Oxidation (M)	_M(ox)MNLGAQLVK_	TGME49_247550-t26_1-p1	heat shock protein HSP60 GN=TGME49_247550	2	560.796	0.21043	0.021013	46.001	1
1915	MNVLADCLK	9	Unmodified	_MNVLADCLK_	TGME49_234450-t26_1-p1	ribosomal protein RPS15A GN=TGME49_234450	2	532.267	0.45631	0.010893	61.593	1
1916	MNVLADCLK	9	Unmodified	_MNVLADCLK_	TGME49_234450-t26_1-p1	ribosomal protein RPS15A GN=TGME49_234450	2	532.267	0.17786	0.02552	49.3	1
1917	MPEGTVVSNVEEK	13	Unmodified	_MPEGTVVSNVEEK_	TGME49_204020-t26_1-p1	ribosomal protein RPL8 GN=TGME49_204020	2	709.845	2.3396	0.0072182	43.03	1
1918	MPSIMLTVHEPNTK	14	Unmodified	_MPSIMLTVHEPNTK_	TGME49_264660-t26_1-p1	SAG-related sequence SRS44 GN=TGME49_264660	3	533.274	-0.24476	0.00024156	52.527	1
1919	MQKALLDAR	9	Oxidation (M),malon(K)	_M(ox)QK(ma)ALLDAR_	TGME49_246960-t26_1-p1	Metallo-beta-lactamase domain protein(predict) GN=TGME49_246960	2	574.292	0.63446	0.0028247	58.172	1
1920	MSEMPQLEK	9	Unmodified	_MSEMPQLEK_	TGME49_218410-t26_1-p1	ribosomal protein RPP0 GN=TGME49_218410	2	546.757	-1.175	0.012817	58.699	1
1921	MSQILEPR	8	Oxidation (M)	_M(ox)SQILEPR_	TGME49_256760-t26_1-p1	pyruvate kinase PyK1 GN=TGME49_256760	2	495.258		0.0068014	63.076	1
1922	MTGGVAVIK	9	Unmodified	_MTGGVAVIK_	TGME49_247550-t26_1-p1	heat shock protein HSP60 GN=TGME49_247550	2	438.255	-1.8551	0.029973	46.462	1
1923	MTGPAVTEVEGSAEDK	16	Unmodified	_MTGPAVTEVEGSAEDK_	TGME49_211680-t26_1-p1	protein disulfide isomerase GN=TGME49_211680	2	810.875	0.62093	1.1884e-05	48.288	1
1924	MTGPAVTEVEGSAEDK	16	Unmodified	_MTGPAVTEVEGSAEDK_	TGME49_211680-t26_1-p1	protein disulfide isomerase GN=TGME49_211680	2	810.875	-0.17449	0.01557	32.858	1
1925	MTGPAVTEVEGSAEDK	16	Oxidation (M)	_M(ox)TGPAVTEVEGSAEDK_	TGME49_211680-t26_1-p1	protein disulfide isomerase GN=TGME49_211680	2	818.872	-0.0018385	2.8657e-19	101.05	1
1926	MTVTITADHR	10	Unmodified	_MTVTITADHR_	TGME49_206610-t26_1-p1	pyruvate dehydrogenase complex subunit PDH-E2 GN=TGME49_206610	3	382.197	-0.79709	0.0092664	37.968	1
1927	MTYASSK	7	Unmodified	_MTYASSK_	TGME49_220400-t26_1-p1	actin depolymerizing factor ADF GN=TGME49_220400	2	394.186	-0.038471	0.029777	70.69	1
1928	MTYASSK	7	Unmodified	_MTYASSK_	TGME49_220400-t26_1-p1	actin depolymerizing factor ADF GN=TGME49_220400	2	394.186	0.00111	0.0064738	85.813	1
1929	MVAAIPR	7	Oxidation (M)	_M(ox)VAAIPR_	TGME49_226430-t26_1-p1	reticulon protein GN=TGME49_226430	2	387.221	0.61049	0.027657	75.311	1
1930	MVAAIPR	7	Unmodified	_MVAAIPR_	TGME49_226430-t26_1-p1	reticulon protein GN=TGME49_226430	2	379.223	-0.56849	0.019202	75.311	1
1931	MVNYIFECPAR	11	Unmodified	_MVNYIFECPAR_	TGME49_222220-t26_1-p1	alveolin domain containing intermediate filament IMC7 GN=TGME49_222220	2	700.328	1.0123	0.00016531	78.342	1
1932	MVPNEALPLTECLK	14	Unmodified	_MVPNEALPLTECLK_	TGME49_297060-t26_1-p1	phosphoglycerate mutase PGMII GN=TGME49_297060	2	807.915	0.20899	0.0010161	52.527	1
1933	MVQEAEK	7	Unmodified	_MVQEAEK_	TGME49_273760-t26_1-p1	heat shock protein HSP70 GN=TGME49_273760	2	417.705	-0.62494	0.010804	104.45	1
1934	MVQEAEK	7	Unmodified	_MVQEAEK_	TGME49_273760-t26_1-p1	heat shock protein HSP70 GN=TGME49_273760	2	417.705	-0.93675	0.011753	79.469	1
1935	MVQEAEKYKAEDEQNK	16	malon(K)	_MVQEAEK(ma)YKAEDEQNK_	TGME49_273760-t26_1-p1	heat shock protein HSP70 GN=TGME49_273760	3	675.974	-0.55572	0.00020982	50.358	1
1936	MVVAAAGDVDHK	12	Unmodified	_MVVAAAGDVDHK_	TGME49_236210-t26_1-p1	peptidase M16 family potein, putative GN=TGME49_236210	3	404.873	1.669	0.012871	29.98	1
1937	MVVAAAGDVDHK	12	Unmodified	_MVVAAAGDVDHK_	TGME49_236210-t26_1-p1	peptidase M16 family potein, putative GN=TGME49_236210	3	404.873	-0.079694	1.1795e-05	77.124	1
1938	MYDAGLIYR	9	Unmodified	_MYDAGLIYR_	TGME49_253290-t26_1-p1	valyl-tRNA synthetase GN=TGME49_253290	2	551.274	-0.16693	0.0048012	74.92	1
1939	MYGLSNQPDVR	11	Unmodified	_MYGLSNQPDVR_	TGME49_231850-t26_1-p1	serine-threonine phosophatase 2C (PP2C) GN=TGME49_231850	2	640.309	0.45359	0.0074694	46.352	1
1940	MYGLSNQPDVR	11	Unmodified	_MYGLSNQPDVR_	TGME49_231850-t26_1-p1	serine-threonine phosophatase 2C (PP2C) GN=TGME49_231850	2	640.309	0.40523	0.003299	59.84	1
1941	MYSGVLNQVR	10	Unmodified	_MYSGVLNQVR_	TGME49_249530-t26_1-p1	exportin 1, putative GN=TGME49_249530	2	583.803	-1.0752	0.0055266	60.398	1
1942	NAKLLFPTNTPVTK	14	malon(K)	_NAK(ma)LLFPTNTPVTK_	TGME49_253430-t26_1-p1	asparagine synthetase, putative GN=TGME49_253430	2	815.446	-0.029124	0.0062036	50.831	1
1943	NALEGYLHSMK	11	Unmodified	_NALEGYLHSMK_	TGME49_311720-t26_1-p1	chaperonin protein BiP GN=TGME49_311720	3	421.545	0.17854	0.0010598	56.936	1
1944	NALEGYLHSMK	11	Unmodified	_NALEGYLHSMK_	TGME49_311720-t26_1-p1	chaperonin protein BiP GN=TGME49_311720	2	631.814	-0.46893	0.0097518	44.543	1
1945	NALIHDGLVR	10	Unmodified	_NALIHDGLVR_	TGME49_205340-t26_1-p1	ribosomal protein RPS12 GN=TGME49_205340	2	554.317	0.070223	0.00152	77.662	1
1946	NALIHDGLVR	10	Unmodified	_NALIHDGLVR_	TGME49_205340-t26_1-p1	ribosomal protein RPS12 GN=TGME49_205340	2	554.317	0.80783	2.3516e-05	98.048	1
1947	NAMTGGNTYHFVR	13	Unmodified	_NAMTGGNTYHFVR_	TGME49_226960-t26_1-p1	phosphofructokinase PFKII GN=TGME49_226960	3	489.898	-0.088258	0.00014994	58.32	1
1948	NAMTGGNTYHFVR	13	Unmodified	_NAMTGGNTYHFVR_	TGME49_226960-t26_1-p1	phosphofructokinase PFKII GN=TGME49_226960	2	734.344	0.21527	0.00056759	59.227	1
1949	NATGGHFEYR	10	Unmodified	_NATGGHFEYR_	TGME49_223410-t26_1-p1	eukaryotic initiation factor-4E, putative GN=TGME49_223410	3	384.512	-0.24259	0.0034964	45.829	1
1950	NATTESDLTEK	11	Unmodified	_NATTESDLTEK_	TGME49_227360-t26_1-p1	ribosomal protein RPL3 GN=TGME49_227360	2	604.786	0.28653	0.0066058	49.448	1
1951	NATTESDLTEK	11	Unmodified	_NATTESDLTEK_	TGME49_227360-t26_1-p1	ribosomal protein RPL3 GN=TGME49_227360	2	604.786	0.78067	0.00022475	74.611	1
1952	NAVAVALCTQGK	12	Unmodified	_NAVAVALCTQGK_	TGME49_263040-t26_1-p1	ribosomal protein RPS16 GN=TGME49_263040	2	616.327	0.79945	0.0010754	63.091	1
1953	NAVAVALCTQGK	12	Unmodified	_NAVAVALCTQGK_	TGME49_263040-t26_1-p1	ribosomal protein RPS16 GN=TGME49_263040	2	616.327	1.5225	0.00011223	67.997	1
1954	NAVETITVEK	10	Unmodified	_NAVETITVEK_	TGME49_228170-t26_1-p1	inner membrane complex protein IMC2A GN=TGME49_228170	2	552.301	0.97384	0.018073	44.612	1
1955	NAVETITVEK	10	Unmodified	_NAVETITVEK_	TGME49_228170-t26_1-p1	inner membrane complex protein IMC2A GN=TGME49_228170	2	552.301	0.59975	0.0050677	61.344	1
1956	NAVVTVPAYFNDAQR	15	Unmodified	_NAVVTVPAYFNDAQR_	TGME49_311720-t26_1-p1	chaperonin protein BiP GN=TGME49_311720	2	832.923	0.11967	0.017646	33.265	1
1957	NAYNDVFR	8	Unmodified	_NAYNDVFR_	TGME49_283540-t26_1-p1	MIC20(predict) GN=TGME49_283540	2	499.738	1.3748	0.0063274	80.455	1
1958	NAYNDVFR	8	Unmodified	_NAYNDVFR_	TGME49_283540-t26_1-p1	MIC20(predict) GN=TGME49_283540	2	499.738	0.41654	0.0013389	89.698	1
1959	NCAFGEKPEPVNTHLR	16	malon(K)	_NCAFGEK(ma)PEPVNTHLR_	TGME49_213350-t26_1-p1	ribosomal protein RPS15 GN=TGME49_213350	3	652.307	2.0009	1.6884e-06	57.788	1
1960	NCLTDFHGMDMTR	13	Unmodified	_NCLTDFHGMDMTR_	TGME49_232710-t26_1-p1	ribosomal protein RPS3A GN=TGME49_232710	3	533.223	-0.88082	0.014338	27.767	1
1961	NCLTDFHGMDMTR	13	Unmodified	_NCLTDFHGMDMTR_	TGME49_232710-t26_1-p1	ribosomal protein RPS3A GN=TGME49_232710	3	533.223	0.3697	0.0022364	41.621	1
1962	NCPVLAIDNVR	11	Unmodified	_NCPVLAIDNVR_	TGME49_261570-t26_1-p1	ribosomal protein RPL7A GN=TGME49_261570	2	635.832	0.062005	0.023728	37.18	1
1963	NCPVLAIDNVR	11	Unmodified	_NCPVLAIDNVR_	TGME49_261570-t26_1-p1	ribosomal protein RPL7A GN=TGME49_261570	2	635.832	-0.1451	0.0063532	50.354	1
1964	NDAVEIIANDQGNR	14	Unmodified	_NDAVEIIANDQGNR_	TGME49_273760-t26_1-p1	heat shock protein HSP70 GN=TGME49_273760	2	764.871	0.049855	0.00010936	64.52	1
1965	NDEELSK	7	Unmodified	_NDEELSK_	TGME49_261250-t26_1-p1	histone H2A1 GN=TGME49_261250	2	417.696	-0.24567	0.013225	77.923	1
1966	NDELTLEGIR	10	Unmodified	_NDELTLEGIR_	TGME49_250770-t26_1-p1	eukaryotic initiation factor-4A, putative GN=TGME49_250770	2	580.301	-3.8878	0.0018786	72.2	1
1967	NDELTLEGIR	10	Unmodified	_NDELTLEGIR_	TGME49_250770-t26_1-p1	eukaryotic initiation factor-4A, putative GN=TGME49_250770	2	580.301	-1.6782	0.00092771	82.417	1
1968	NDLLPFNSK	9	Unmodified	_NDLLPFNSK_	TGME49_232350-t26_1-p1	lactate dehydrogenase LDH1 GN=TGME49_232350	2	524.277	-1.3033	0.0071631	67.207	1
1969	NDLLPFNSK	9	Unmodified	_NDLLPFNSK_	TGME49_232350-t26_1-p1	lactate dehydrogenase LDH1 GN=TGME49_232350	2	524.277	-0.06695	0.00020466	117.01	1
1970	NEAETLIYSVEK	12	Unmodified	_NEAETLIYSVEK_	TGME49_251780-t26_1-p1	heat shock protein GN=TGME49_251780	2	698.354	0.21915	0.013102	40.941	1
1971	NEAETLIYSVEK	12	Unmodified	_NEAETLIYSVEK_	TGME49_251780-t26_1-p1	heat shock protein GN=TGME49_251780	2	698.354	0.57724	0.015315	39.629	1
1972	NEATINPTNTLFDVK	15	Unmodified	_NEATINPTNTLFDVK_	TGME49_311720-t26_1-p1	chaperonin protein BiP GN=TGME49_311720	2	838.928	0.79347	0.002411	44.252	1
1973	NEATINPTNTLFDVK	15	Unmodified	_NEATINPTNTLFDVK_	TGME49_311720-t26_1-p1	chaperonin protein BiP GN=TGME49_311720	2	838.928	-0.020984	8.0784e-17	110.97	1
1974	NEATINPTNTLFDVK	15	Unmodified	_NEATINPTNTLFDVK_	TGME49_311720-t26_1-p1	chaperonin protein BiP GN=TGME49_311720	2	838.928	0.38983	0.019796	32.702	1
1975	NEEGFITDLLK	11	Unmodified	_NEEGFITDLLK_	TGME49_239740-t26_1-p1	dense granule protein GRA14 GN=TGME49_239740	2	639.832	-0.039328	0.02658	35.677	1
1977	NELSGSLTGLTR	12	Unmodified	_NELSGSLTGLTR_	TGME49_300260-t26_1-p1	threonyl-tRNA synthetase family protein GN=TGME49_300260	2	624.333	-0.12837	0.0040882	50.222	1
1978	NEWGWCK	7	Unmodified	_NEWGWCK_	TGME49_268850-t26_1-p1	enolase 2 GN=TGME49_268850	2	490.208	0.029928	0.011888	79.307	1
1979	NEWGWCK	7	Unmodified	_NEWGWCK_	TGME49_268850-t26_1-p1	enolase 2 GN=TGME49_268850	2	490.208	-0.16036	0.0073866	94.662	1
1980	NEYLATLNR	9	Unmodified	_NEYLATLNR_	TGME49_249270-t26_1-p1	protein disulfide isomerase-related protein (provisional), putative GN=TGME49_249270	2	547.285	-0.67376	0.022156	51.445	1
1981	NEYLATLNR	9	Unmodified	_NEYLATLNR_	TGME49_249270-t26_1-p1	protein disulfide isomerase-related protein (provisional), putative GN=TGME49_249270	2	547.285	-0.96404	0.0028841	81.099	1
1982	NFLQAEIR	8	Unmodified	_NFLQAEIR_	TGME49_230450-t26_1-p1	bifunctional GMP synthase/glutamine amidotransferase protein GN=TGME49_230450	2	495.772	0.51896	0.016198	68.224	1
1983	NFMNLTFNQK	10	Unmodified	_NFMNLTFNQK_	TGME49_316540-t26_1-p1	IMC sub-compartment protein ISP3 GN=TGME49_316540	2	628.808	0.51584	0.013329	47.844	1
1984	NFNASAAK	8	Unmodified	_NFNASAAK_	TGME49_208370-t26_1-p1	myosin heavy chain, putative GN=TGME49_208370	2	411.709	-0.34065	0.016822	67.494	1
1985	NFSGEDSSEIDEK	13	Unmodified	_NFSGEDSSEIDEK_	TGME49_214940-t26_1-p1	MIC2-associated protein M2AP GN=TGME49_214940	2	728.807	-0.00062166	0.0027223	47.621	1
1986	NFSGEDSSEIDEK	13	Unmodified	_NFSGEDSSEIDEK_	TGME49_214940-t26_1-p1	MIC2-associated protein M2AP GN=TGME49_214940	2	728.807	0.23629	2.2323e-16	103.11	1
1987	NFVDIVFDR	9	Unmodified	_NFVDIVFDR_	TGME49_235470-t26_1-p1	myosin A GN=TGME49_235470	2	562.79	0.21974	0.0067073	68.657	1
1988	NFYVEHPAVANMSAEEAER	19	Unmodified	_NFYVEHPAVANMSAEEAER_	TGME49_236650-t26_1-p1	DEAD (Asp-Glu-Ala-Asp) box polypeptide 17 GN=TGME49_236650	3	721.997	0.13193	8.9635e-09	57.366	1
1989	NGGSVEYLHNHNNKPFIR	18	malon(K)	_NGGSVEYLHNHNNK(ma)PFIR_	TGME49_231850-t26_1-p1	serine-threonine phosophatase 2C (PP2C) GN=TGME49_231850	4	546.266	0.44304	0.00036282	42.639	1
1990	NGGSVEYLHNHNNKPFIR	18	malon(K)	_NGGSVEYLHNHNNK(ma)PFIR_	TGME49_231850-t26_1-p1	serine-threonine phosophatase 2C (PP2C) GN=TGME49_231850	3	728.019	-0.67647	1.4791e-05	48.053	1
1991	NGILSVSAVDK	11	Unmodified	_NGILSVSAVDK_	TGME49_311720-t26_1-p1	chaperonin protein BiP GN=TGME49_311720	2	551.809	0.31675	0.00027975	71.176	1
1992	NGYSPVIDCHTAHIACK	17	Unmodified	_NGYSPVIDCHTAHIACK_	TGME49_294800-t26_1-p1	elongation factor 1-alpha (EF-1-ALPHA), putative GN=TGME49_294800	4	486.478	-0.047614	2.8312e-16	97.235	1
1993	NGYSPVIDCHTAHIACK	17	Unmodified	_NGYSPVIDCHTAHIACK_	TGME49_294800-t26_1-p1	elongation factor 1-alpha (EF-1-ALPHA), putative GN=TGME49_294800	4	486.478	0.081848	6.0839e-16	94.454	1
1994	NGYSPVIDCHTAHIACK	17	Unmodified	_NGYSPVIDCHTAHIACK_	TGME49_294800-t26_1-p1	elongation factor 1-alpha (EF-1-ALPHA), putative GN=TGME49_294800	3	648.301	-1.0337	2.3329e-07	65.231	1
1995	NHHKVIFR	8	malon(K)	_NHHK(ma)VIFR_	TGME49_311240-t26_1-p1	DnaJ family chaperone, putative GN=TGME49_311240	3	379.537	0.084884	0.0095758	48.091	1
1996	NHHKVIFR	8	malon(K)	_NHHK(ma)VIFR_	TGME49_311240-t26_1-p1	DnaJ family chaperone, putative GN=TGME49_311240	3	379.537	-1.6362	0.0063975	53.751	1
1997	NIATVFFEPSTR	12	Unmodified	_NIATVFFEPSTR_	TGME49_291640-t26_1-p1	aspartate carbamoyltransferase GN=TGME49_291640	2	691.359	-2.2479	0.0048835	46.88	1
1998	NIHYCIADDGSGK	13	Unmodified	_NIHYCIADDGSGK_	TGME49_265450-t26_1-p1	hexokinase GN=TGME49_265450	3	483.886	-1.4756	0.014106	27.938	1
1999	NIHYCIADDGSGK	13	Unmodified	_NIHYCIADDGSGK_	TGME49_265450-t26_1-p1	hexokinase GN=TGME49_265450	3	483.886	-2.2433	0.02805	28.724	1
2000	NIPGVELCK	9	Unmodified	_NIPGVELCK_	TGME49_309120-t26_1-p1	ribosomal protein RPL4 GN=TGME49_309120	2	515.274	-0.47413	0.023869	50.353	1
2001	NIPIYFVTFSDK	12	Unmodified	_NIPIYFVTFSDK_	TGME49_243730-t26_1-p1	rhoptry protein ROP9 GN=TGME49_243730	2	722.38	-0.16353	0.016366	39.006	1
2002	NIPIYFVTFSDK	12	Unmodified	_NIPIYFVTFSDK_	TGME49_243730-t26_1-p1	rhoptry protein ROP9 GN=TGME49_243730	2	722.38	-1.0677	0.013888	40.475	1
2003	NIPNWYR	7	Unmodified	_NIPNWYR_	TGME49_248340-t26_1-p1	GTP-binding nuclear protein ran/tc4 GN=TGME49_248340	2	481.746	-0.12924	0.0062194	92.692	1
2004	NIPNWYR	7	Unmodified	_NIPNWYR_	TGME49_248340-t26_1-p1	GTP-binding nuclear protein ran/tc4 GN=TGME49_248340	2	481.746	0.016969	0.010663	102.98	1
2005	NIPQPVR	7	Unmodified	_NIPQPVR_	TGME49_215775-t26_1-p1	rhoptry protein ROP8 GN=TGME49_215775	2	412.243	-0.37662	0.013623	77.748	1
2006	NIPQPVR	7	Unmodified	_NIPQPVR_	TGME49_215775-t26_1-p1	rhoptry protein ROP8 GN=TGME49_215775	2	412.243	-0.35564	0.0040424	88.734	1
2007	NIPQPVR	7	Unmodified	_NIPQPVR_	TGME49_215775-t26_1-p1	rhoptry protein ROP8 GN=TGME49_215775	2	412.243	-1.038	0.032655	69.432	1
2008	NIVDASSQR	9	Unmodified	_NIVDASSQR_	TGME49_243570-t26_1-p1	ribosomal protein RPS26 GN=TGME49_243570	2	495.254	0.4044	0.0030139	80.688	1
2009	NIVDASSQR	9	Unmodified	_NIVDASSQR_	TGME49_243570-t26_1-p1	ribosomal protein RPS26 GN=TGME49_243570	2	495.254	-0.70591	0.019577	42.336	1
2010	NIVHGSDSVESANK	14	Unmodified	_NIVHGSDSVESANK_	TGME49_295350-t26_1-p1	nucleoside diphosphate kinase, putative GN=TGME49_295350	3	486.239	-0.69706	9.4392e-07	69.92	1
2011	NIVHGSDSVESANK	14	Unmodified	_NIVHGSDSVESANK_	TGME49_295350-t26_1-p1	nucleoside diphosphate kinase, putative GN=TGME49_295350	2	728.855	-0.1884	0.00026094	60.55	1
2012	NIVVAVGGR	9	Unmodified	_NIVVAVGGR_	TGME49_309730-t26_1-p1	thioredoxin reductase GN=TGME49_309730	2	442.769	0.14937	0.004405	76.221	1
2013	NIVVAVGGR	9	Unmodified	_NIVVAVGGR_	TGME49_309730-t26_1-p1	thioredoxin reductase GN=TGME49_309730	2	442.769	-0.13179	0.0047636	75.043	1
2014	NIYDGCNTLQIQPSR	15	Unmodified	_NIYDGCNTLQIQPSR_	TGME49_290660-t26_1-p1	RNA recognition motif-containing protein GN=TGME49_290660	2	889.928	-0.07567	4.0413e-05	62.861	1
2015	NIYDGCNTLQIQPSR	15	Unmodified	_NIYDGCNTLQIQPSR_	TGME49_290660-t26_1-p1	RNA recognition motif-containing protein GN=TGME49_290660	2	889.928	0.20943	5.7628e-15	104.95	1
2016	NKSVAILR	8	malon(K)	_NK(ma)SVAILR_	TGME49_315860-t26_1-p1	EF hand domain-containing protein GN=TGME49_315860	2	493.785	-0.55085	0.027209	43.308	1
2017	NLAEGESVEFR	11	Unmodified	_NLAEGESVEFR_	TGME49_320600-t26_1-p1	cold-shock DNA-binding domain-containing protein GN=TGME49_320600	2	625.804	1.3731	0.0066058	49.448	1
2018	NLDIERPTYTNLNR	14	Unmodified	_NLDIERPTYTNLNR_	TGME49_316400-t26_1-p1	alpha tubulin TUBA1 GN=TGME49_316400	2	859.945	0.099979	0.0068464	50.088	1
2019	NLDIERPTYTNLNR	14	Unmodified	_NLDIERPTYTNLNR_	TGME49_316400-t26_1-p1	alpha tubulin TUBA1 GN=TGME49_316400	3	573.632	0.089471	0.0016818	54.09	1
2020	NLDIERPTYTNLNR	14	Unmodified	_NLDIERPTYTNLNR_	TGME49_316400-t26_1-p1	alpha tubulin TUBA1 GN=TGME49_316400	3	573.632	-0.051754	6.6074e-08	80.746	1
2021	NLELNCGGDHVTYANHCIR	19	Unmodified	_NLELNCGGDHVTYANHCIR_	TGME49_208450-t26_1-p1	protease inhibitor PI2 GN=TGME49_208450	4	561.507	-0.31955	3.7421e-12	69.935	1
2022	NLGNLTCSGKGAR	13	malon(K)	_NLGNLTCSGK(ma)GAR_	TGME49_209450-t26_1-p1	TLD protein GN=TGME49_209450	2	717.344	0.92642	3.0626e-13	103.79	1
2023	NLLQGGIYMYPPTK	14	Unmodified	_NLLQGGIYMYPPTK_	TGME49_247510-t26_1-p1	fructose-bisphospatase II GN=TGME49_247510	2	797.919	0.30522	0.014615	35.657	1
2024	NLLQGGIYMYPPTK	14	Unmodified	_NLLQGGIYMYPPTK_	TGME49_247510-t26_1-p1	fructose-bisphospatase II GN=TGME49_247510	2	797.919		1.1916e-05	47.774	1
2025	NLLQGGIYMYPPTK	14	Unmodified	_NLLQGGIYMYPPTK_	TGME49_247510-t26_1-p1	fructose-bisphospatase II GN=TGME49_247510	2	797.919	-0.33696	0.0062452	42.317	1
2026	NLLSVAYK	8	Unmodified	_NLLSVAYK_	TGME49_263090-t26_1-p1	14-3-3 protein GN=TGME49_263090	2	454.266	0.47051	0.0069257	79.474	1
2027	NLLSVAYK	8	Unmodified	_NLLSVAYK_	TGME49_263090-t26_1-p1	14-3-3 protein GN=TGME49_263090	2	454.266	0.20281	0.0069257	79.474	1
2028	NLQVAGPVR	9	Unmodified	_NLQVAGPVR_	TGME49_223050-t26_1-p1	ribosomal protein RPS20 GN=TGME49_223050	2	477.28	-0.76834	0.0049896	74.301	1
2029	NLQYYDISAR	10	Unmodified	_NLQYYDISAR_	TGME49_248340-t26_1-p1	GTP-binding nuclear protein ran/tc4 GN=TGME49_248340	2	621.809	-0.23595	0.0019612	70.942	1
2030	NLQYYDISAR	10	Unmodified	_NLQYYDISAR_	TGME49_248340-t26_1-p1	GTP-binding nuclear protein ran/tc4 GN=TGME49_248340	2	621.809	-0.18284	8.3323e-05	90.05	1
2031	NLRDEYVYK	9	Unmodified	_NLRDEYVYK_	TGME49_263090-t26_1-p1	14-3-3 protein GN=TGME49_263090	3	400.54	1.1528	0.028405	58.23	1
2032	NLRDEYVYK	9	Unmodified	_NLRDEYVYK_	TGME49_263090-t26_1-p1	14-3-3 protein GN=TGME49_263090	3	400.54	1.1223	0.0070607	40.021	1
2033	NLSFNATEESIR	12	Unmodified	_NLSFNATEESIR_	TGME49_291930-t26_1-p1	RNA recognition motif-containing protein GN=TGME49_291930	2	690.841	-0.14737	0.0050763	46.069	1
2034	NLSFNATEESIR	12	Unmodified	_NLSFNATEESIR_	TGME49_291930-t26_1-p1	RNA recognition motif-containing protein GN=TGME49_291930	2	690.841	0.12455	0.0015321	61.11	1
2035	NLVENCLDEQQPK	13	Unmodified	_NLVENCLDEQQPK_	TGME49_263090-t26_1-p1	14-3-3 protein GN=TGME49_263090	2	793.878	-1.0746	0.00181	51.726	1
2036	NLVENCLDEQQPK	13	Unmodified	_NLVENCLDEQQPK_	TGME49_263090-t26_1-p1	14-3-3 protein GN=TGME49_263090	2	793.878	-0.0090443	7.285e-14	102.73	1
2037	NLVVDPLPR	9	Unmodified	_NLVVDPLPR_	TGME49_288650-t26_1-p1	dense granule protein GRA12 GN=TGME49_288650	2	511.803	-0.11782	0.018531	53.756	1
2038	NLVVDPLPR	9	Unmodified	_NLVVDPLPR_	TGME49_288650-t26_1-p1	dense granule protein GRA12 GN=TGME49_288650	2	511.803	-0.76647	0.014002	56.916	1
2039	NLYIIAVK	8	Unmodified	_NLYIIAVK_	TGME49_312090-t26_1-p1	ribosomal protein RPL23 GN=TGME49_312090	2	467.292	0.59821	0.030719	55.531	1
2040	NLYIIAVK	8	Unmodified	_NLYIIAVK_	TGME49_312090-t26_1-p1	ribosomal protein RPL23 GN=TGME49_312090	2	467.292	0.68634	0.020006	64.265	1
2041	NMMCASDPR	9	Unmodified	_NMMCASDPR_	TGME49_266960-t26_1-p1	beta tubulin GN=TGME49_266960	2	541.215	-0.23657	0.028836	47.187	1
2042	NMSVIAHVDHGK	12	Unmodified	_NMSVIAHVDHGK_	TGME49_205470-t26_1-p1	translation elongation factor 2 family protein, putative GN=TGME49_205470	3	436.556	0.031446	0.0037348	39.394	1
2043	NMSVIAHVDHGK	12	Unmodified	_NMSVIAHVDHGK_	TGME49_205470-t26_1-p1	translation elongation factor 2 family protein, putative GN=TGME49_205470	3	436.556	0.25127	1.8074e-05	73.273	1
2044	NMSVIAHVDHGK	12	Unmodified	_NMSVIAHVDHGK_	TGME49_205470-t26_1-p1	translation elongation factor 2 family protein, putative GN=TGME49_205470	3	436.556	0.26746	1.8074e-05	73.273	1
2045	NMSVIAHVDHGK	12	Unmodified	_NMSVIAHVDHGK_	TGME49_205470-t26_1-p1	translation elongation factor 2 family protein, putative GN=TGME49_205470	2	654.33	-0.76411	0.0013067	62.088	1
2046	NNAEAAACQKQR	12	malon(K)	_NNAEAAACQK(ma)QR_	TGME49_288630-t26_1-p1	nucleosome assembly protein (NAP), putative GN=TGME49_288630	2	723.823	-0.091719	1.9804e-05	88.075	1
2047	NNAEAAACQKQR	12	malon(K)	_NNAEAAACQK(ma)QR_	TGME49_288630-t26_1-p1	nucleosome assembly protein (NAP), putative GN=TGME49_288630	3	482.885	0.21224	1.3463e-07	91.64	1
2048	NNAEAAACQKQR	12	malon(K)	_NNAEAAACQK(ma)QR_	TGME49_288630-t26_1-p1	nucleosome assembly protein (NAP), putative GN=TGME49_288630	2	723.823	-0.1964	8.5783e-10	115.12	1
2049	NNAEAAACQKQR	12	malon(K)	_NNAEAAACQK(ma)QR_	TGME49_288630-t26_1-p1	nucleosome assembly protein (NAP), putative GN=TGME49_288630	3	482.885	0.11097	3.0108e-06	84.734	1
2050	NNEFATR	7	Unmodified	_NNEFATR_	TGME49_207440-t26_1-p1	ribosomal protein RPS4 GN=TGME49_207440	2	426.204	0.46864	0.027921	71.501	1
2051	NNEIVLVK	8	Unmodified	_NNEIVLVK_	TGME49_211680-t26_1-p1	protein disulfide isomerase GN=TGME49_211680	2	464.777	-0.32402	0.0015009	90.709	1
2052	NNFPGLPR	8	Unmodified	_NNFPGLPR_	TGME49_233450-t26_1-p1	SAG-related sequence SRS29A GN=TGME49_233450	2	457.746	-0.33436	0.016406	67.981	1
2053	NNFPGLPR	8	Unmodified	_NNFPGLPR_	TGME49_233450-t26_1-p1	SAG-related sequence SRS29A GN=TGME49_233450	2	457.746	0.74501	0.018203	66.073	2
2054	NNSAAVFAWK	10	Unmodified	_NNSAAVFAWK_	TGME49_225050-t26_1-p1	adenosylhomocysteinase, putative GN=TGME49_225050	2	554.283	0.059077	0.0063507	58.699	1
[truncated: 1,248 more rows]

## Sheet: statistics
Peptide length	Number of peptides	Number of modification sites per protein	Number of proteins
7	246	1	152
8	366	2	28
9	411	3	17
10	488	5	4
11	389	6	1
12	405	9	1
13	274
14	211
15	148
16	103
17	73
18	34
19	21
20	18
21	14
22	16
23	8
24	9
25	1
26	1
27	4
28	3
29	3
35	1
